# Supplementary material for: Factors affecting relative abundance of low-mobility fishing resources: spiny lobster in the Galapagos Marine Reserve
Source: PeerJ. 2019 Jul 8;7:e7278. doi: 10.7717/peerj.7278 (PMC6622163; doi:10.7717/peerj.7278)
Supplement: Dataset S2 [file peerj-07-7278-s010.xlsx]

## Sheet: Raw data Panulirus penicillatus
No	HOME_PORT	MONTH	YEAR	SST	FISHING_SCHEDULE	DATA_SOURCE	MACROZONE	ILAND	REGION	DISTANCE	LAT	LON	DIVERS	DIVING HOURS	CPUE
1	Ayora	Sep	2002	21.5	Night	Landing	Rabida	Rabida	Centre- South	37.2	-0.435	-90.701	2	3	0.75
2	Ayora	Sep	2002	21.5	Night	Landing	Rabida	Rabida	Centre- South	37.2	-0.435	-90.701	1	3	2.13333
3	Ayora	Sep	2002	21.5	Night	Landing	Rabida	Rabida	Centre- South	37.2	-0.435	-90.701	2	3	0.916667
4	Ayora	Sep	2002	21.5	Night	Landing	Rabida	Rabida	Centre- South	37.2	-0.435	-90.701	2	3	1.5
5	Ayora	Sep	2002	21.6	Day	Landing	Wolf	Wolf	North	177	1.39131	-91.8293	6	6	1.5
6	Ayora	Sep	2002	21.2	Day	Landing	Wolf	Wolf	North	177	1.39131	-91.8293	6	10	1.67667
7	Ayora	Oct	2002	21.8	Night	Landing	Wolf	Wolf	North	177	1.39131	-91.8293	1	15	1.05333
8	Ayora	Oct	2002	21.8	Night	Landing	Wolf	Wolf	North	177	1.39131	-91.8293	5	15	0.777333
9	Ayora	Oct	2002	21.8	Night	Landing	Wolf	Wolf	North	177	1.39131	-91.8293	2	14	0.578571
10	Ayora	Oct	2002	21.8	Night	Landing	Wolf	Wolf	North	177	1.39131	-91.8293	2	15	0.876667
11	Ayora	Nov	2002	23.5	Night	Observer	Rabida	Rabida	Centre- South	37.2	-0.40335	-90.7022	2	4	1.25
12	Ayora	Nov	2002	23.5	Day	Observer	Rabida	Rabida	Centre- South	37.2	-0.40335	-90.7022	1	4	0.625
13	Baquerizo	Nov	2002	24.3	Night	Observer	Rabida	Rabida	Centre- South	89	-0.435	-90.701	2	6	0.45
14	Baquerizo	Nov	2002	24.3	Night	Observer	Rabida	Rabida	Centre- South	89	-0.435	-90.701	1	7	0.972857
15	Baquerizo	Nov	2002	24.3	Night	Observer	Rabida	Rabida	Centre- South	89	-0.435	-90.701	1	7	1.42857
16	Ayora	Nov	2002	23	Day	Observer	Wolf	Wolf	North	171	1.37883	-91.8191	2	2	1.375
17	Ayora	Nov	2002	23	Night	Observer	Wolf	Wolf	North	171	1.38009	-91.8218	2	5	0.75
18	Ayora	Nov	2002	23.1	Night	Observer	Wolf	Wolf	North	171	1.38009	-91.8218	2	5	1.7
19	Ayora	Nov	2002	23.1	Day	Observer	Wolf	Wolf	North	171	1.38009	-91.8218	2	3	0.833333
20	Ayora	Nov	2002	23.4	Night	Observer	Wolf	Wolf	North	171	1.37878	-91.8187	2	4	1.875
21	Ayora	Nov	2002	23.3	Night	Observer	Wolf	Wolf	North	171	1.38009	-91.8218	2	4	1.4375
22	Ayora	Nov	2002	23.3	Night	Landing	Wolf	Wolf	North	171	1.38009	-91.8218	1	4	3.5
23	Ayora	Nov	2002	23.3	Night	Landing	Wolf	Wolf	North	171	1.38009	-91.8218	2	4	1.3125
24	Ayora	Nov	2002	23.3	Night	Observer	Wolf	Wolf	North	171	1.38009	-91.8218	2	4	1.75
25	Ayora	Nov	2002	23	Night	Observer	Wolf	Wolf	North	171	1.38009	-91.8218	2	5	0.5
26	Ayora	Nov	2002	23.4	Night	Observer	Wolf	Wolf	North	171	1.37878	-91.8187	2	4	0.625
27	Ayora	Nov	2002	23.4	Night	Observer	Wolf	Wolf	North	171	1.37878	-91.8187	2	4	1.75
28	Ayora	Nov	2002	23.3	Night	Observer	Wolf	Wolf	North	171	1.38269	-91.8231	2	3	1.25
29	Ayora	Nov	2002	23.1	Night	Observer	Wolf	Wolf	North	171	1.38009	-91.8218	2	4	2.125
30	Ayora	Nov	2002	23.4	Night	Observer	Wolf	Wolf	North	171	1.37878	-91.8187	2	4	0.875
31	Ayora	Nov	2002	23.3	Night	Observer	Wolf	Wolf	North	171	1.38008	-91.8262	2	2	1.125
32	Ayora	Nov	2002	22.4	Day	Observer	Wolf	Wolf	North	177	1.39131	-91.8293	6	3	0.277778
33	Ayora	Sep	2002	21.6	Day	Landing	Darwin	Darwin	North	184	1.50014	-91.9143	6	9	1.7037
34	Ayora	Sep	2002	21.2	Day	Landing	Darwin	Darwin	North	184	1.50014	-91.9143	6	11	1.59848
35	Baquerizo	Sep	2002	21.3	Night	Observer	Española	Española	Centre- South	35.4	-0.79671	-90.0531	1	8	0.945833
36	Baquerizo	Sep	2002	21.3	Night	Observer	Española	Española	Centre- South	35.4	-1.36813	-89.7406	1	7	2.32857
37	Baquerizo	Sep	2002	21.3	Night	Landing	Española	Española	Centre- South	36.6	-1.3477	-89.6749	2	6	0.402778
38	Villamil	Sep	2002	20.4	Day	Landing	Floreana	Floreana	Centre- South	49.2	-1.25857	-90.3642	1	30	2.68333
39	Villamil	Sep	2002	20.4	Day	Landing	Floreana	Floreana	Centre- South	33.7	-1.2301	-90.4723	1	40	0.9525
40	Baquerizo	Sep	2002	20.4	Day	Observer	Floreana	Floreana	Centre- South	57.7	-1.31779	-90.3343	1	5	0.362
41	Baquerizo	Sep	2002	20.4	Day	Observer	Floreana	Floreana	Centre- South	57.7	-1.31779	-90.3343	1	6	0.226667
42	Baquerizo	Sep	2002	20.4	Night	Observer	Floreana	Floreana	Centre- South	71.8	-1.31943	-90.509	1	3	3.32333
43	Baquerizo	Sep	2002	20.4	Night	Observer	Floreana	Floreana	Centre- South	71.8	-1.31943	-90.509	1	4	0.225
44	Baquerizo	Sep	2002	20.4	Day	Observer	Floreana	Floreana	Centre- South	71.8	-1.31943	-90.509	2	5	0.608
45	Baquerizo	Sep	2002	20.4	Day	Observer	Floreana	Floreana	Centre- South	71.8	-1.31943	-90.509	1	5	1.994
46	Baquerizo	Sep	2002	20.4	Day	Observer	Floreana	Floreana	Centre- South	71.8	-1.31943	-90.509	1	6	2.72
47	Baquerizo	Sep	2002	20.4	Day	Observer	Floreana	Floreana	Centre- South	71.8	-1.31943	-90.509	2	3	1.965
48	Baquerizo	Sep	2002	20.4	Night	Observer	Floreana	Floreana	Centre- South	65.2	-1.23613	-90.4799	1	6	1.435
49	Baquerizo	Sep	2002	20.4	Night	Observer	Floreana	Floreana	Centre- South	65.2	-1.23613	-90.4799	1	8	1.0775
50	Baquerizo	Sep	2002	20.4	Day	Observer	Floreana	Floreana	Centre- South	69.7	-1.30332	-90.3846	1	8	0.4525
51	Baquerizo	Sep	2002	20.4	Day	Observer	Floreana	Floreana	Centre- South	69.7	-1.30332	-90.3846	2	5	0.272
52	Baquerizo	Sep	2002	20.4	Night	Observer	Floreana	Floreana	Centre- South	65.2	-1.2364	-90.4807	1	5	1.994
53	Baquerizo	Sep	2002	20.4	Night	Observer	Floreana	Floreana	Centre- South	65.2	-1.23613	-90.4799	2	4	1.13375
54	Baquerizo	Sep	2002	20.4	Day	Observer	Floreana	Floreana	Centre- South	65.2	-1.23613	-90.4799	1	3	0.3
55	Baquerizo	Sep	2002	20.4	Night	Observer	Floreana	Floreana	Centre- South	63.7	-1.23131	-90.4775	2	4	1.36
56	Baquerizo	Sep	2002	20.4	Day	Observer	Floreana	Floreana	Centre- South	69.7	-1.30332	-90.3846	2	5	0.181
57	Baquerizo	Sep	2002	20.4	Night	Observer	Floreana	Floreana	Centre- South	69.7	-1.35567	-90.463	1	4	1.1325
58	Baquerizo	Sep	2002	20.4	Day	Observer	Floreana	Floreana	Centre- South	69.7	-1.30332	-90.3846	1	5	2.176
59	Baquerizo	Sep	2002	20.4	Day	Observer	Floreana	Floreana	Centre- South	69.7	-1.36157	-90.4551	1	7	2.59143
60	Baquerizo	Sep	2002	20.4	Day	Observer	Floreana	Floreana	Centre- South	69.7	-1.35376	-90.4675	1	6	1.66167
61	Baquerizo	Sep	2002	20.4	Day	Observer	Floreana	Floreana	Centre- South	71.8	-1.31943	-90.509	2	4	1.24625
62	Baquerizo	Sep	2002	20.4	Night	Observer	Floreana	Floreana	Centre- South	60.5			1	4	2.2675
63	Baquerizo	Sep	2002	20.4	Day	Observer	Floreana	Floreana	Centre- South	69.7	-1.35954	-90.4446	1	5	2.902
64	Baquerizo	Sep	2002	20.4	Day	Observer	Floreana	Floreana	Centre- South	69.7	-1.36213	-90.4543	1	5	2.902
65	Baquerizo	Sep	2002	20.4	Day	Observer	Floreana	Floreana	Centre- South	69.7	-1.35922	-90.4448	2	6	1.13333
66	Baquerizo	Sep	2002	20.4	Day	Observer	Floreana	Floreana	Centre- South	57.7	-1.31779	-90.3343	1	6	0.755
67	Baquerizo	Sep	2002	20.4	Day	Observer	Floreana	Floreana	Centre- South	60.4	-1.3141	-90.3769	1	5	1.178
68	Baquerizo	Sep	2002	20.4	Day	Observer	Floreana	Floreana	Centre- South	60.4	-1.30802	-90.3733	1	4	4.42
69	Baquerizo	Sep	2002	20.4	Day	Observer	Floreana	Floreana	Centre- South	60.4	-1.30817	-90.3733	2	4	1.025
70	Baquerizo	Sep	2002	20.4	Day	Observer	Floreana	Floreana	Centre- South	60.4	-1.2919	-90.3585	1	5	1.994
71	Baquerizo	Sep	2002	20.4	Day	Observer	Floreana	Floreana	Centre- South	71.8	-1.30224	-90.5039	2	5	0.997
72	Baquerizo	Sep	2002	20.4	Night	Observer	Floreana	Floreana	Centre- South	71.8	-1.31943	-90.509	1	4	2.38
73	Baquerizo	Sep	2002	20.4	Night	Observer	Floreana	Floreana	Centre- South	71.8	-1.30183	-90.505	1	4	2.72
74	Baquerizo	Sep	2002	20.4	Night	Observer	Floreana	Floreana	Centre- South	71.8	-1.31943	-90.509	1	3	0.906667
75	Baquerizo	Sep	2002	20.4	Day	Observer	Floreana	Floreana	Centre- South	63.7	-1.2301	-90.4723	1	4	2.2675
76	Baquerizo	Sep	2002	20.4	Night	Observer	Floreana	Floreana	Centre- South	63.7	-1.23023	-90.475	2	6	1.73833
77	Baquerizo	Sep	2002	20.4	Night	Landing	Floreana	Floreana	Centre- South	69.2	-1.2881	-90.4968	1	4	1.5
78	Baquerizo	Sep	2002	20.4	Night	Observer	Floreana	Floreana	Centre- South	69.4	-1.29001	-90.4992	2	5	2.95
79	Baquerizo	Sep	2002	20.4	Night	Observer	Floreana	Floreana	Centre- South	69.4	-1.29001	-90.4992	2	5	3.22
80	Baquerizo	Sep	2002	20.4	Night	Observer	Floreana	Floreana	Centre- South	60.5	-1.27589	-90.039	1	5	1.08
81	Baquerizo	Sep	2002	20.4	Night	Landing	Floreana	Floreana	Centre- South	60.4	-1.3141	-90.3769	1	5	1.44
82	Baquerizo	Sep	2002	20.4	Day	Observer	Floreana	Floreana	Centre- South	69.7	-1.30332	-90.3846	5	16	0.98775
83	Ayora	Sep	2002	23.9	Day	Landing	Genovesa	Genovesa	North	71.1	0.3123	-89.9583	9	8	3.37083
84	Baquerizo	Sep	2002	23.9	Day	Landing	Genovesa	Genovesa	North	86.6	0.3123	-89.9583	1	7	1.61429
85	Baquerizo	Sep	2002	23.9	Night	Landing	Genovesa	Genovesa	North	86.6	0.3123	-89.9583	1	6	1.7
86	Baquerizo	Sep	2002	23.9	Night	Landing	Genovesa	Genovesa	North	86.6	0.3123	-89.9583	1	4	5.365
87	Ayora	Sep	2002	22.5	Day	Observer	Isabela Norte y Este	Isabela	West	36	-0.73991	-90.7976	1	4	0.125
88	Ayora	Sep	2002	22.5	Day	Observer	Isabela Norte y Este	Isabela	West	42.2	-0.60311	-90.9571	1	4	0.0416667
89	Ayora	Sep	2002	22.5	Day	Observer	Isabela Norte y Este	Isabela	West	37.4	-0.62526	-90.8769	1	4	0.125
90	Ayora	Sep	2002	22.5	Day	Observer	Isabela Norte y Este	Isabela	West	42.2	-0.60304	-90.9081	2	4	0.875
91	Ayora	Sep	2002	22.5	Day	Observer	Isabela Norte y Este	Isabela	West	42.2	-0.60304	-90.9081	2	4	0.375
92	Ayora	Sep	2002	22.5	Night	Observer	Isabela Norte y Este	Isabela	West	47.3	-0.60304	-90.9081	2	4	0.125
93	Ayora	Sep	2002	22.5	Day	Observer	Isabela Norte y Este	Isabela	West	36	-0.73991	-90.7976	2	4	0.0625
94	Ayora	Sep	2002	22.5	Night	Landing	Isabela Norte y Este	Isabela	West	90.6	0.1711	-91.3558	1	2	2.5
95	Ayora	Sep	2002	22.5	Night	Landing	Isabela Norte y Este	Isabela	West	90.6	0.1711	-91.3558	7	4	1.17857
96	Ayora	Sep	2002	22.5	Night	Landing	Isabela Norte y Este	Isabela	West	76.9	-0.017	-91.1991	7	10	1.21429
97	Ayora	Sep	2002	22.5	Night	Landing	Isabela Norte y Este	Isabela	West	67.5	-0.218	-91.1731	7	10	1.3
98	Ayora	Sep	2002	22.5	Night	Landing	Isabela Norte y Este	Isabela	West	61.2	-0.3039	-91.0875	7	3	0.904762
99	Ayora	Sep	2002	22.5	Night	Landing	Isabela Norte y Este	Isabela	West	50.3	-0.375	-90.9555	7	4	0.696429
100	Ayora	Sep	2002	22.5	Day	Landing	Isabela Norte y Este	Isabela	West	90.6	0.1711	-91.3558	6	12	1.29167
101	Ayora	Sep	2002	22.5	Day	Landing	Isabela Norte y Este	Isabela	West	67.5	-0.218	-91.1731	6	6	2.625
102	Ayora	Sep	2002	22.5	Day	Landing	Isabela Norte y Este	Isabela	West	47.3	-0.4944	-90.95	6	10	1.04167
103	Ayora	Sep	2002	22.5	Day	Landing	Isabela Norte y Este	Isabela	West	90.6	0.1711	-91.3558	6	15	0.88
104	Villamil	Sep	2002	22.5	Day	Landing	Isabela Norte y Este	Isabela	West	40.8	-0.58936	-90.9423	1	7	0.814286
105	Villamil	Sep	2002	22.5	Day	Landing	Isabela Norte y Este	Isabela	West	40.8	-0.58936	-90.9423	1	16	0.17
106	Villamil	Sep	2002	22.5	Day	Landing	Isabela Norte y Este	Isabela	West	93.6	0.1423	-91.3766	1	5	2.72
107	Baquerizo	Sep	2002	22.5	Night	Observer	Isabela Norte y Este	Isabela	West	129	-0.01733	-91.2083	1	6	1.81333
108	Baquerizo	Sep	2002	22.5	Night	Observer	Isabela Norte y Este	Isabela	West	143	0.1711	-91.3558	1	6	1.58667
109	Baquerizo	Sep	2002	22.5	Night	Observer	Isabela Norte y Este	Isabela	West	143	-0.13865	-91.3238	2	5	1.044
110	Baquerizo	Sep	2002	22.5	Night	Observer	Isabela Norte y Este	Isabela	West	129	-0.017	-91.1991	1	5	3.082
111	Baquerizo	Sep	2002	22.5	Night	Observer	Isabela Norte y Este	Isabela	West	143	0.1711	-91.3558	1	1	4.08
112	Baquerizo	Sep	2002	22.5	Night	Observer	Isabela Norte y Este	Isabela	West	129	-0.017	-91.1991	1	4	0.4525
113	Baquerizo	Sep	2002	22.5	Night	Observer	Isabela Norte y Este	Isabela	West	129	-0.01787	-91.2086	2	3	0.453333
114	Baquerizo	Sep	2002	22.5	Night	Observer	Isabela Norte y Este	Isabela	West	143	0.1711	-91.3558	2	5	0.816
115	Baquerizo	Sep	2002	22.5	Night	Observer	Isabela Norte y Este	Isabela	West	129	-0.017	-91.1991	2	6	0.566667
116	Baquerizo	Sep	2002	22.5	Night	Observer	Isabela Norte y Este	Isabela	West	143	0.1711	-91.3558	8	22	0.172614
117	Baquerizo	Sep	2002	22.5	Night	Observer	Isabela Norte y Este	Isabela	West	129	-0.017	-91.1991	8	24	0.172396
118	Villamil	Sep	2002	21.6	Day	Landing	Isabela Oeste	Isabela	West	76.7	-0.43544	-91.2364	1	30	0.589667
119	Villamil	Sep	2002	21.6	Day	Landing	Isabela Oeste	Isabela	West	76.7	-0.43544	-91.2364	1	20	1.349
120	Villamil	Sep	2002	21.6	Day	Landing	Isabela Oeste	Isabela	West	76.7	-0.43544	-91.2364	1	39	0.530769
121	Villamil	Sep	2002	21.6	Day	Landing	Isabela Oeste	Isabela	West	76.7	-0.43544	-91.2364	2	15	0.55
122	Villamil	Sep	2002	21.6	Day	Landing	Isabela Oeste	Isabela	West	76.7	-0.43544	-91.2364	1	4	0.35
123	Villamil	Sep	2002	21.6	Day	Landing	Isabela Oeste	Isabela	West	76.7	-0.43544	-91.2364	1	5	1.1
124	Villamil	Sep	2002	21.6	Night	Landing	Isabela Oeste	Isabela	West	76.7	-0.43544	-91.2364	1	41	0.334146
125	Villamil	Sep	2002	21.6	Day	Landing	Isabela Oeste	Isabela	West	77.3	-0.679682	-91.2618	1	4	0.175
126	Villamil	Sep	2002	21.2	Night	Landing	Isabela Sur	Isabela	West	17	-0.79173	-90.8193	2	7	1.25
127	Villamil	Sep	2002	21.2	Day	Landing	Isabela Sur	Isabela	West	17	-0.79173	-90.8193	1	10	1.043
128	Villamil	Sep	2002	21.2	Day	Landing	Isabela Sur	Isabela	West	17	-0.79173	-90.8193	1	15	1.23933
129	Villamil	Sep	2002	21.2	Day	Landing	Isabela Sur	Isabela	West	17	-0.79173	-90.8193	1	12	2.2675
130	Villamil	Sep	2002	21.2	Day	Landing	Isabela Sur	Isabela	West	4.83	-1.0041	-91.039	1	4	0.375
131	Villamil	Sep	2002	21.2	Day	Landing	Isabela Sur	Isabela	West	4.83	-1.0041	-91.039	1	3	2.2
132	Villamil	Sep	2002	21.2	Day	Landing	Isabela Sur	Isabela	West	4.83	-1.0041	-91.039	1	4	1.02
133	Villamil	Sep	2002	21.2	Day	Landing	Isabela Sur	Isabela	West	4.83	-1.0041	-91.039	1	5	1.724
134	Villamil	Sep	2002	21.2	Day	Landing	Isabela Sur	Isabela	West	4.83	-1.0041	-91.039	1	4	0.34
135	Villamil	Sep	2002	21.2	Day	Landing	Isabela Sur	Isabela	West	14.7	-1.05069	-91.1743	1	16	0.92125
136	Villamil	Sep	2002	21.2	Day	Landing	Isabela Sur	Isabela	West	14.7	-1.05069	-91.1743	1	5	0.18
137	Villamil	Sep	2002	21.2	Day	Landing	Isabela Sur	Isabela	West	14.7	-1.05069	-91.1743	1	3	2
138	Villamil	Sep	2002	21.2	Day	Landing	Isabela Sur	Isabela	West	14.7	-1.05069	-91.1743	1	3	2.11667
139	Villamil	Sep	2002	21.2	Day	Landing	Isabela Sur	Isabela	West	14.7	-1.05069	-91.1743	1	12	1.48167
140	Villamil	Sep	2002	21.2	Day	Landing	Isabela Sur	Isabela	West	1.93	-0.97723	-90.988	1	3.5	0.171429
141	Villamil	Sep	2002	21.2	Night	Landing	Isabela Sur	Isabela	West	1.93	-0.97723	-90.988	1	3	0.756667
142	Villamil	Sep	2002	21.2	Day	Landing	Isabela Sur	Isabela	West	12.2	-1.0394	-91.1467	1	4	0.17
143	Villamil	Sep	2002	21.2	Day	Landing	Isabela Sur	Isabela	West	12.2	-1.0394	-91.1467	1	10	0.431
144	Villamil	Sep	2002	21.2	Night	Observer	Isabela Sur	Isabela	West	12.2	-1.02824	-91.2458	2	2.5	3.9
145	Villamil	Sep	2002	21.2	Night	Observer	Isabela Sur	Isabela	West	12.2	-1.02824	-91.2957	2	2.5	3.356
146	Villamil	Sep	2002	21.2	Night	Observer	Isabela Sur	Isabela	West	12.2	-1.05417	-91.1637	2	3	5.51833
147	Villamil	Sep	2002	21.2	Day	Landing	Isabela Sur	Isabela	West	12.2	-1.0394	-91.1467	1	15	0.378
148	Villamil	Sep	2002	21.2	Day	Observer	Isabela Sur	Isabela	West	34.2	-1.01267	-91.4131	1	3	0.766667
149	Villamil	Sep	2002	21.2	Day	Observer	Isabela Sur	Isabela	West	34.2	-0.92011	-91.5063	1	3	3.03
150	Villamil	Sep	2002	21.2	Day	Observer	Isabela Sur	Isabela	West	34.2	-0.92011	-91.5063	1	2	1.02
151	Villamil	Sep	2002	21.2	Day	Observer	Isabela Sur	Isabela	West	34.2	-0.91959	-91.5065	1	3	0.0666667
152	Villamil	Sep	2002	21.2	Day	Observer	Isabela Sur	Isabela	West	34.2	-1.01322	-91.4195	2	3	0.0333333
153	Villamil	Sep	2002	21.2	Day	Landing	Isabela Sur	Isabela	West	34.2	-0.95519	-91.461	1	12	1.47417
154	Villamil	Sep	2002	21.2	Day	Landing	Isabela Sur	Isabela	West	34.2	-0.95519	-91.461	1	6	0.75
155	Villamil	Sep	2002	21.2	Day	Landing	Isabela Sur	Isabela	West	34.2	-0.95519	-91.461	1	6	1.36667
156	Villamil	Sep	2002	21.2	Day	Observer	Isabela Sur	Isabela	West	9.18	-0.95802	-90.9637	1	6.5	0.104615
157	Villamil	Sep	2002	21.2	Day	Landing	Isabela Sur	Isabela	West	9.18	-1.02	-91.1	1	5	0.26
158	Villamil	Sep	2002	21.2	Day	Landing	Isabela Sur	Isabela	West	1.21	-0.978203	-90.9576	1	3	0.0666667
159	Villamil	Sep	2002	21.2	Day	Landing	Isabela Sur	Isabela	West	1.21	-0.978203	-90.9576	1	4	0.175
160	Villamil	Sep	2002	21.2	Night	Landing	Isabela Sur	Isabela	West	1.21	-0.978203	-90.9576	1	4	2.3325
161	Villamil	Sep	2002	21.2	Day	Landing	Isabela Sur	Isabela	West	1.21	-0.978203	-90.9576	1	4	0.5675
162	Villamil	Sep	2002	21.2	Day	Landing	Isabela Sur	Isabela	West	2.1	-0.9711	-90.9343	1	3	0.466667
163	Villamil	Sep	2002	21.2	Night	Landing	Isabela Sur	Isabela	West	2.1	-0.9711	-90.9343	1	2.5	2.36
164	Villamil	Sep	2002	21.2	Day	Landing	Isabela Sur	Isabela	West	14.3	-0.85295	-90.7848	1	4	2.55
165	Villamil	Sep	2002	21.2	Day	Landing	Isabela Sur	Isabela	West	14.9	-1.04912	-91.1846	1	6	0.983333
166	Villamil	Sep	2002	21.2	Day	Landing	Isabela Sur	Isabela	West	14.9	-1.04912	-91.1846	1	6	0.908333
167	Villamil	Sep	2002	21.2	Day	Landing	Isabela Sur	Isabela	West	14.9	-1.04912	-91.1846	1	12	2.75917
168	Villamil	Sep	2002	21.2	Night	Observer	Isabela Sur	Isabela	West	14.9	-1.04831	-91.1649	1	2.5	2.088
169	Villamil	Sep	2002	21.2	Day	Observer	Isabela Sur	Isabela	West	14.9	-1.04711	-91.1681	2	4	0.70875
170	Villamil	Sep	2002	21.2	Day	Observer	Isabela Sur	Isabela	West	14.9	-1.04716	-91.1609	1	4	0.34
171	Villamil	Sep	2002	21.2	Day	Landing	Isabela Sur	Isabela	West	14.9	-1.04912	-91.1846	1	8	0.79375
172	Villamil	Sep	2002	21.2	Day	Landing	Isabela Sur	Isabela	West	14.9	-1.04912	-91.1846	2	10	0.59
173	Villamil	Sep	2002	21.2	Day	Observer	Isabela Sur	Isabela	West	14.9	-1.0474	-91.1683	2	3	0.453333
174	Villamil	Sep	2002	21.2	Day	Observer	Isabela Sur	Isabela	West	14.9	-1.04912	-91.1846	1	1	0.23
175	Villamil	Sep	2002	21.2	Day	Landing	Isabela Sur	Isabela	West	14.9	-1.04912	-91.1846	2	15	0.378
176	Villamil	Sep	2002	21.2	Night	Observer	Isabela Sur	Isabela	West	14.9	-1.0477	-91.2042	2	2	4.475
177	Villamil	Sep	2002	21.2	Day	Landing	Isabela Sur	Isabela	West	14.9	-1.04912	-91.1846	2	15	0.468667
178	Villamil	Sep	2002	21.2	Day	Landing	Isabela Sur	Isabela	West	6.56	-1.01864	-91.0558	1	4	0.625
179	Villamil	Sep	2002	21.2	Day	Landing	Isabela Sur	Isabela	West	6.56	-1.01864	-91.0558	1	5	0.44
180	Villamil	Sep	2002	21.2	Day	Landing	Isabela Sur	Isabela	West	9.22	-1.03944	-91.0943	1	3	0.0666667
181	Villamil	Sep	2002	21.2	Day	Landing	Isabela Sur	Isabela	West	9.22	-1.03944	-91.0943	1	3	1.66667
182	Villamil	Sep	2002	21.2	Day	Observer	Isabela Sur	Isabela	West	18	-1.03199	-91.2286	2	3	2.11667
183	Villamil	Sep	2002	21.2	Day	Observer	Isabela Sur	Isabela	West	18	-1.0477	-91.2042	2	3	0.983333
184	Villamil	Sep	2002	21.2	Day	Landing	Isabela Sur	Isabela	West	18	-1.0358	-91.2282	1	5	0.28
185	Villamil	Sep	2002	21.2	Day	Landing	Isabela Sur	Isabela	West	18	-1.0358	-91.2282	2	20	0.1975
186	Villamil	Sep	2002	21.2	Day	Landing	Isabela Sur	Isabela	West	18	-1.0358	-91.2282	1	20	0.69
187	Villamil	Sep	2002	21.2	Day	Landing	Isabela Sur	Isabela	West	18	-1.0358	-91.2282	1	12	0.0191667
188	Villamil	Sep	2002	21.2	Day	Landing	Isabela Sur	Isabela	West	18	-1.0358	-91.2282	1	12	1.65833
189	Villamil	Sep	2002	21.2	Day	Landing	Isabela Sur	Isabela	West	18	-1.0358	-91.2282	1	20	0.905
190	Villamil	Sep	2002	21.2	Day	Landing	Isabela Sur	Isabela	West	18	-1.0358	-91.2282	1	12	0.3025
191	Villamil	Sep	2002	21.2	Day	Landing	Isabela Sur	Isabela	West	18	-1.0358	-91.2282	1	20	0.395
192	Villamil	Sep	2002	21.2	Day	Landing	Isabela Sur	Isabela	West	18	-1.0358	-91.2282	1	12	0.0941667
193	Ayora	Sep	2002	23	Night	Observer	Marchena	Marchena	North	81.3	0.34456	-90.5468	1	3	0.5
194	Ayora	Sep	2002	23	Day	Observer	Marchena	Marchena	North	86	0.36777	-90.4385	1	4	0.875
195	Ayora	Sep	2002	23	Night	Observer	Marchena	Marchena	North	81.3	0.34456	-90.5468	1	3	0.333333
196	Ayora	Sep	2002	23	Day	Observer	Marchena	Marchena	North	86	0.36689	-90.4116	2	4	0.4375
197	Ayora	Sep	2002	23	Night	Observer	Marchena	Marchena	North	81.3	0.34456	-90.5468	2	3	1.33333
198	Ayora	Sep	2002	23	Day	Observer	Marchena	Marchena	North	86	0.36777	-90.4486	2	3	0.0833333
199	Ayora	Sep	2002	23	Day	Observer	Marchena	Marchena	North	86	0.36689	-90.4116	2	4	0.375
200	Ayora	Sep	2002	23	Night	Observer	Marchena	Marchena	North	81.3	0.34456	-90.5468	2	3	0.0833333
201	Baquerizo	Sep	2002	23	Night	Observer	Marchena	Marchena	North	104	0.366883	-90.4402	1	2	2.945
202	Baquerizo	Sep	2002	23	Night	Observer	Marchena	Marchena	North	104	0.366883	-90.4402	2	2	0.905
203	Baquerizo	Sep	2002	23	Night	Observer	Marchena	Marchena	North	104	0.366883	-90.4402	8	8	0.290469
204	Ayora	Oct	2002	23	Day	Landing	Darwin	Darwin	North	184	1.50014	-91.9143	1	20	1.325
205	Ayora	Oct	2002	23	Day	Landing	Darwin	Darwin	North	184	1.50014	-91.9143	5	20	0.789
206	Ayora	Oct	2002	23	Day	Landing	Darwin	Darwin	North	184	1.50014	-91.9143	2	20	0.4875
207	Ayora	Oct	2002	23	Day	Landing	Darwin	Darwin	North	184	1.50014	-91.9143	2	20	0.8225
208	Baquerizo	Oct	2002	22.3	Night	Landing	Española	Española	Centre- South	37.9	-1.409	-89.6251	1	5	3.628
209	Baquerizo	Oct	2002	22.3	Night	Observer	Española	Española	Centre- South	35.4	-1.36813	-89.7406	1	3	3.63333
210	Baquerizo	Oct	2002	22.3	Night	Observer	Española	Española	Centre- South	35.4	-1.36813	-89.7406	1	5	4.36
211	Baquerizo	Oct	2002	22.3	Night	Observer	Española	Española	Centre- South	35.4	-1.36813	-89.7406	1	5	4.82
212	Baquerizo	Oct	2002	22.3	Night	Landing	Española	Española	Centre- South	36.6	-1.3477	-89.6749	1	5	2.26
213	Baquerizo	Oct	2002	22.3	Night	Observer	Española	Española	Centre- South	33.8	-1.20919	-89.3889	1	5	0.908
214	Baquerizo	Oct	2002	22.3	Night	Observer	Española	Española	Centre- South	33.8	-1.3467	-89.6421	1	3	2
215	Baquerizo	Oct	2002	22.3	Night	Observer	Española	Española	Centre- South	33.8	-1.3467	-89.6421	1	3	1.74
216	Ayora	Oct	2002	21.7	Day	Landing	Floreana	Floreana	Centre- South	34	-1.3141	-90.3769	1	10	2.3
217	Villamil	Oct	2002	21.7	Day	Landing	Floreana	Floreana	Centre- South	33.7	-1.2301	-90.4723	2	30	0.9675
218	Baquerizo	Oct	2002	21.7	Night	Observer	Floreana	Floreana	Centre- South	69.4	-1.29001	-90.4992	2	5	3.81
219	Baquerizo	Oct	2002	21.7	Night	Observer	Floreana	Floreana	Centre- South	60.4	-1.3141	-90.3769	2	5	3
220	Baquerizo	Oct	2002	21.7	Night	Observer	Floreana	Floreana	Centre- South	60.4	-1.3141	-90.3769	2	5	1.36
221	Baquerizo	Oct	2002	21.7	Night	Observer	Floreana	Floreana	Centre- South	60.4	-1.3141	-90.3769	2	5	2.636
222	Baquerizo	Oct	2002	21.7	Night	Observer	Floreana	Floreana	Centre- South	69.4	-1.29001	-90.4992	2	5	2.54
223	Baquerizo	Oct	2002	21.7	Night	Observer	Floreana	Floreana	Centre- South	60.4	-1.3141	-90.3769	2	5	1.72
224	Baquerizo	Oct	2002	21.7	Night	Observer	Floreana	Floreana	Centre- South	69.4	-1.27584	-90.4902	2	5	1.18
225	Baquerizo	Oct	2002	21.7	Night	Observer	Floreana	Floreana	Centre- South	60.4	-1.3141	-90.3769	1	6	0.6
226	Baquerizo	Oct	2002	21.7	Night	Observer	Floreana	Floreana	Centre- South	69.4	-1.29001	-90.4992	1	5	3.08
227	Baquerizo	Oct	2002	21.7	Night	Observer	Floreana	Floreana	Centre- South	69.4	-1.29001	-90.4992	1	3	4.36667
228	Baquerizo	Oct	2002	21.7	Night	Observer	Floreana	Floreana	Centre- South	69.4	-1.29001	-90.4992	1	5	3.26
229	Baquerizo	Oct	2002	21.7	Night	Observer	Floreana	Floreana	Centre- South	57.7	-1.31779	-90.3343	1	5	3.54
230	Baquerizo	Oct	2002	21.7	Night	Observer	Floreana	Floreana	Centre- South	60.4	-1.3141	-90.3769	1	5	0.72
231	Baquerizo	Oct	2002	21.7	Night	Observer	Floreana	Floreana	Centre- South	65.2	-1.27584	-90.4902	1	6	2.26667
232	Baquerizo	Oct	2002	21.7	Night	Observer	Floreana	Floreana	Centre- South	60.9	-1.2206	-90.428	1	5	4
233	Baquerizo	Oct	2002	21.7	Night	Observer	Floreana	Floreana	Centre- South	69.4	-1.29001	-90.4992	1	5	4
234	Baquerizo	Oct	2002	21.7	Night	Observer	Floreana	Floreana	Centre- South	69.4	-1.29001	-90.4992	1	6	2.53333
235	Baquerizo	Oct	2002	21.7	Night	Observer	Floreana	Floreana	Centre- South	57.7	-1.15928	-90.214	1	6	1.515
236	Baquerizo	Oct	2002	21.7	Night	Observer	Floreana	Floreana	Centre- South	71.8	-1.18898	-90.3076	1	5	0.544
237	Baquerizo	Oct	2002	21.7	Night	Observer	Floreana	Floreana	Centre- South	57.7	-1.16363	-90.2118	1	6	1.06
238	Baquerizo	Oct	2002	21.7	Night	Observer	Floreana	Floreana	Centre- South	71.8	-1.31943	-90.509	1	6	4.24167
239	Baquerizo	Oct	2002	21.7	Night	Observer	Floreana	Floreana	Centre- South	69.7	-1.21226	-90.2805	1	6	1.36333
240	Baquerizo	Oct	2002	21.7	Night	Observer	Floreana	Floreana	Centre- South	69.7	-1.2434	-90.2778	1	8	2.2725
241	Ayora	Oct	2002	22.6	Night	Observer	Isabela Norte y Este	Isabela	West	113	-0.27378	-91.6215	2	4	2.1875
242	Ayora	Oct	2002	22.6	Night	Observer	Isabela Norte y Este	Isabela	West	42.2	-0.58936	-90.9423	2	3	0.666667
243	Ayora	Oct	2002	22.6	Day	Observer	Isabela Norte y Este	Isabela	West	59.9	-0.4191	-90.9605	2	5	0.03
244	Ayora	Oct	2002	22.6	Night	Observer	Isabela Norte y Este	Isabela	West	113	-0.2656	-91.6215	1	3	2.16667
245	Ayora	Oct	2002	22.6	Night	Observer	Isabela Norte y Este	Isabela	West	42.2	-0.58936	-90.9423	1	6	0.0833333
246	Ayora	Oct	2002	22.6	Night	Landing	Isabela Norte y Este	Isabela	West	47.3	-0.4944	-90.95	1	10	1.99
247	Ayora	Oct	2002	22.6	Night	Landing	Isabela Norte y Este	Isabela	West	50.3	-0.375	-90.9555	1	10	1.2
248	Ayora	Oct	2002	22.6	Night	Observer	Isabela Norte y Este	Isabela	West	42.2	-0.58936	-90.9423	3	3	0.5
249	Ayora	Oct	2002	22.6	Day	Observer	Isabela Norte y Este	Isabela	West	59.9	-0.42424	-90.9511	3	5	0.02
250	Ayora	Oct	2002	22.6	Night	Observer	Isabela Norte y Este	Isabela	West	113	0.271987	-91.6254	3	3	2.66667
251	Ayora	Oct	2002	22	Night	Observer	Isabela Oeste	Isabela	West	128	-0.26002	-91.3715	2	4	0.375
252	Ayora	Oct	2002	22	Day	Observer	Isabela Oeste	Isabela	West	46.8	-0.55177	-90.8579	2	3	0.0833333
253	Ayora	Oct	2002	22	Night	Observer	Isabela Oeste	Isabela	West	128	-0.26755	-91.3725	1	4	1.25
254	Ayora	Oct	2002	22	Day	Observer	Isabela Oeste	Isabela	West	46.8	-0.5488	-90.8567	1	3	0.5
255	Ayora	Oct	2002	22	Night	Observer	Isabela Oeste	Isabela	West	128	-0.26409	-91.3723	3	4	0.666667
256	Villamil	Oct	2002	22	Day	Landing	Isabela Oeste	Isabela	West	76.7	-0.43544	-91.2364	1	3	0.966667
257	Villamil	Oct	2002	22	Day	Landing	Isabela Oeste	Isabela	West	76.7	-0.43544	-91.2364	2	20	0.669
258	Villamil	Oct	2002	22	Day	Landing	Isabela Oeste	Isabela	West	43.5	-0.84428	-91.4873	1	3	1.13333
259	Baquerizo	Oct	2002	22	Night	Observer	Isabela Oeste	Isabela	West	157	-0.74136	-91.3916	1	6	1.06
260	Baquerizo	Oct	2002	22	Night	Observer	Isabela Oeste	Isabela	West	157	-1.17605	-90.2156	1	5	1.818
261	Baquerizo	Oct	2002	22	Night	Observer	Isabela Oeste	Isabela	West	157	-0.74136	-91.3916	1	4	3.5225
262	Baquerizo	Oct	2002	22	Night	Observer	Isabela Oeste	Isabela	West	157	-0.74136	-91.3916	1	6	2.80167
263	Villamil	Oct	2002	21.6	Day	Landing	Isabela Sur	Isabela	West	3.7	-0.99697	-91.016	2	5	0.136
264	Villamil	Oct	2002	21.6	Day	Landing	Isabela Sur	Isabela	West	3.7	-0.99697	-91.016	1	6	0.075
265	Villamil	Oct	2002	21.6	Day	Landing	Isabela Sur	Isabela	West	3.7	-0.99697	-91.016	1	4.5	0.1
266	Villamil	Oct	2002	21.6	Day	Landing	Isabela Sur	Isabela	West	17	-0.79173	-90.8193	1	10	1.043
267	Villamil	Oct	2002	21.6	Day	Landing	Isabela Sur	Isabela	West	17	-0.79173	-90.8193	1	6	1.43667
268	Villamil	Oct	2002	21.6	Day	Landing	Isabela Sur	Isabela	West	17	-0.79173	-90.8193	1	3	0.15
269	Villamil	Oct	2002	21.6	Day	Landing	Isabela Sur	Isabela	West	17	-0.79173	-90.8193	1	10	0.068
270	Villamil	Oct	2002	21.6	Day	Landing	Isabela Sur	Isabela	West	17	-0.79173	-90.8193	1	8	1.105
271	Villamil	Oct	2002	21.6	Day	Landing	Isabela Sur	Isabela	West	17	-0.79173	-90.8193	1	3	1.5
272	Villamil	Oct	2002	21.6	Day	Landing	Isabela Sur	Isabela	West	4.83	-1.0041	-91.039	2	5	0.18
273	Villamil	Oct	2002	21.6	Day	Landing	Isabela Sur	Isabela	West	4.83	-1.0041	-91.039	1	3	0.0766667
274	Villamil	Oct	2002	21.6	Day	Landing	Isabela Sur	Isabela	West	4.83	-1.0041	-91.039	2	4	0.17
275	Villamil	Oct	2002	21.6	Day	Landing	Isabela Sur	Isabela	West	4.83	-1.0041	-91.039	1	2	0.115
276	Villamil	Oct	2002	21.6	Day	Landing	Isabela Sur	Isabela	West	4.83	-1.0041	-91.039	1	3.5	1.03714
277	Villamil	Oct	2002	21.6	Day	Landing	Isabela Sur	Isabela	West	4.83	-1.0041	-91.039	2	5	0.045
278	Villamil	Oct	2002	21.6	Day	Landing	Isabela Sur	Isabela	West	4.83	-1.0041	-91.039	1	3.5	1.03714
279	Villamil	Oct	2002	21.6	Day	Landing	Isabela Sur	Isabela	West	4.83	-1.0041	-91.039	1	3.5	0.777143
280	Villamil	Oct	2002	21.6	Night	Landing	Isabela Sur	Isabela	West	4.83	-1.0041	-91.039	1	2	1.135
281	Villamil	Oct	2002	21.6	Day	Landing	Isabela Sur	Isabela	West	4.83	-1.0041	-91.039	1	5	1.452
282	Villamil	Oct	2002	21.6	Day	Landing	Isabela Sur	Isabela	West	4.83	-1.0041	-91.039	1	4	0.2275
283	Villamil	Oct	2002	21.6	Day	Landing	Isabela Sur	Isabela	West	4.83	-1.0041	-91.039	1	4.5	0.1
284	Villamil	Oct	2002	21.6	Day	Landing	Isabela Sur	Isabela	West	4.83	-1.0041	-91.039	1	4	0.2275
285	Villamil	Oct	2002	21.6	Day	Landing	Isabela Sur	Isabela	West	4.83	-1.0041	-91.039	1	5	0.182
286	Villamil	Oct	2002	21.6	Day	Landing	Isabela Sur	Isabela	West	4.83	-1.0041	-91.039	1	4	0.17
287	Villamil	Oct	2002	21.6	Day	Landing	Isabela Sur	Isabela	West	4.83	-1.0041	-91.039	1	5	0.136
288	Villamil	Oct	2002	21.6	Day	Landing	Isabela Sur	Isabela	West	4.83	-1.0041	-91.039	2	5	0.068
289	Villamil	Oct	2002	21.6	Day	Landing	Isabela Sur	Isabela	West	4.83	-1.0041	-91.039	1	3	0.68
290	Villamil	Oct	2002	21.6	Day	Landing	Isabela Sur	Isabela	West	4.83	-1.0041	-91.039	1	4	0.17
291	Villamil	Oct	2002	21.6	Day	Landing	Isabela Sur	Isabela	West	4.83	-1.0041	-91.039	1	3	1.96667
292	Villamil	Oct	2002	21.6	Day	Landing	Isabela Sur	Isabela	West	4.83	-1.0041	-91.039	1	4	0.5675
293	Villamil	Oct	2002	21.6	Day	Landing	Isabela Sur	Isabela	West	4.83	-1.0041	-91.039	1	5	0.09
294	Villamil	Oct	2002	21.6	Day	Landing	Isabela Sur	Isabela	West	4.83	-1.0041	-91.039	1	3	0.376667
295	Villamil	Oct	2002	21.6	Day	Landing	Isabela Sur	Isabela	West	4.83	-1.0041	-91.039	1	3	1.51333
296	Villamil	Oct	2002	21.6	Day	Landing	Isabela Sur	Isabela	West	4.83	-1.0041	-91.039	1	3	0.756667
297	Villamil	Oct	2002	21.6	Day	Landing	Isabela Sur	Isabela	West	4.83	-1.0041	-91.039	1	5	1.406
298	Villamil	Oct	2002	21.6	Day	Landing	Isabela Sur	Isabela	West	4.83	-1.0041	-91.039	1	5	0.862
299	Villamil	Oct	2002	21.6	Day	Observer	Isabela Sur	Isabela	West	4.83	-0.97961	-91.0022	1	3	0.226667
300	Villamil	Oct	2002	21.6	Day	Landing	Isabela Sur	Isabela	West	4.83	-1.0041	-91.039	1	4	1.135
301	Villamil	Oct	2002	21.6	Day	Landing	Isabela Sur	Isabela	West	14.7	-1.05069	-91.1743	1	10	1.769
302	Villamil	Oct	2002	21.6	Day	Landing	Isabela Sur	Isabela	West	14.7	-1.05069	-91.1743	1	4	1.475
303	Villamil	Oct	2002	21.6	Day	Landing	Isabela Sur	Isabela	West	14.7	-1.05069	-91.1743	1	12	1.13417
304	Villamil	Oct	2002	21.6	Day	Landing	Isabela Sur	Isabela	West	14.7	-1.05069	-91.1743	2	5	0.272
305	Villamil	Oct	2002	21.6	Day	Landing	Isabela Sur	Isabela	West	14.7	-1.05069	-91.1743	2	13	0.610385
306	Villamil	Oct	2002	21.6	Day	Landing	Isabela Sur	Isabela	West	14.7	-1.05069	-91.1743	1	4	0.4525
307	Villamil	Oct	2002	21.6	Day	Landing	Isabela Sur	Isabela	West	0.52	-0.96708	-90.9665	1	5	0.046
308	Villamil	Oct	2002	21.6	Day	Landing	Isabela Sur	Isabela	West	1.93	-0.97723	-90.988	2	3	0.075
309	Villamil	Oct	2002	21.6	Night	Landing	Isabela Sur	Isabela	West	1.93	-0.97723	-90.988	1	4	1.02
310	Villamil	Oct	2002	21.6	Night	Landing	Isabela Sur	Isabela	West	1.93	-0.97723	-90.988	1	3	1.74
311	Villamil	Oct	2002	21.6	Night	Landing	Isabela Sur	Isabela	West	1.93	-0.97723	-90.988	2	3	1.02
312	Villamil	Oct	2002	21.6	Day	Landing	Isabela Sur	Isabela	West	1.93	-0.97723	-90.988	1	5	0.726
313	Villamil	Oct	2002	21.6	Night	Landing	Isabela Sur	Isabela	West	1.93	-0.97723	-90.988	1	3	0.226667
314	Villamil	Oct	2002	21.6	Day	Landing	Isabela Sur	Isabela	West	12.2	-1.0394	-91.1467	2	12	0.160417
315	Villamil	Oct	2002	21.6	Day	Landing	Isabela Sur	Isabela	West	12.2	-1.0394	-91.1467	1	3	0.15
316	Villamil	Oct	2002	21.6	Day	Landing	Isabela Sur	Isabela	West	12.2	-1.0394	-91.1467	1	3	1.8
317	Villamil	Oct	2002	21.6	Day	Landing	Isabela Sur	Isabela	West	12.2	-1.0394	-91.1467	1	8	0.87875
318	Villamil	Oct	2002	21.6	Day	Landing	Isabela Sur	Isabela	West	12.2	-1.0394	-91.1467	1	8	0.31125
319	Villamil	Oct	2002	21.6	Day	Landing	Isabela Sur	Isabela	West	12.2	-1.0394	-91.1467	2	12	0.6425
320	Villamil	Oct	2002	21.6	Day	Landing	Isabela Sur	Isabela	West	12.2	-1.0394	-91.1467	1	6	1.05833
321	Villamil	Oct	2002	21.6	Day	Landing	Isabela Sur	Isabela	West	12.2	-1.0394	-91.1467	2	15	0.431
322	Villamil	Oct	2002	21.6	Day	Observer	Isabela Sur	Isabela	West	12.2	-1.04117	-91.1571	1	4	1.815
323	Villamil	Oct	2002	21.6	Day	Landing	Isabela Sur	Isabela	West	12.2	-1.0394	-91.1467	2	20	0.5215
324	Villamil	Oct	2002	21.6	Day	Landing	Isabela Sur	Isabela	West	12.2	-1.0394	-91.1467	1	15	0.438667
325	Villamil	Oct	2002	21.6	Day	Landing	Isabela Sur	Isabela	West	12.2	-1.0394	-91.1467	1	12	0.283333
326	Villamil	Oct	2002	21.6	Day	Landing	Isabela Sur	Isabela	West	12.2	-1.0394	-91.1467	2	18	0.831389
327	Villamil	Oct	2002	21.6	Day	Observer	Isabela Sur	Isabela	West	12.2	-1.0421	-91.1584	1	8	1.4175
328	Villamil	Oct	2002	21.6	Night	Observer	Isabela Sur	Isabela	West	12.2	-1.05308	-91.9779	1	4	1.9275
329	Villamil	Oct	2002	21.6	Day	Landing	Isabela Sur	Isabela	West	12.2	-1.0394	-91.1467	1	12	1.3225
330	Villamil	Oct	2002	21.6	Day	Landing	Isabela Sur	Isabela	West	22.7	-0.72072	-90.8072	1	5	0.046
331	Villamil	Oct	2002	21.6	Day	Landing	Isabela Sur	Isabela	West	22.7	-0.72072	-90.8072	1	4	0.17
332	Villamil	Oct	2002	21.6	Day	Landing	Isabela Sur	Isabela	West	3.1	-0.98601	-91.0037	1	2	0.115
333	Villamil	Oct	2002	21.6	Day	Landing	Isabela Sur	Isabela	West	34.2	-0.95519	-91.461	1	16	0.311875
334	Villamil	Oct	2002	21.6	Day	Landing	Isabela Sur	Isabela	West	34.2	-0.95519	-91.461	2	15	0.892
335	Villamil	Oct	2002	21.6	Day	Landing	Isabela Sur	Isabela	West	34.2	-0.95519	-91.461	1	18	1.10833
336	Villamil	Oct	2002	21.6	Day	Landing	Isabela Sur	Isabela	West	34.2	-0.95519	-91.461	2	20	0.35725
337	Villamil	Oct	2002	21.6	Day	Landing	Isabela Sur	Isabela	West	34.2	-0.95519	-91.461	1	20	0.1245
338	Villamil	Oct	2002	21.6	Day	Landing	Isabela Sur	Isabela	West	34.2	-0.95519	-91.461	2	20	1.32925
339	Villamil	Oct	2002	21.6	Night	Landing	Isabela Sur	Isabela	West	7.27	-1.0306	-90.8846	1	3	0.83
340	Villamil	Oct	2002	21.6	Day	Landing	Isabela Sur	Isabela	West	9.18	-1.02	-91.1	1	3	0.0766667
341	Villamil	Oct	2002	21.6	Day	Landing	Isabela Sur	Isabela	West	9.18	-1.02	-91.1	1	4	0.0575
342	Villamil	Oct	2002	21.6	Day	Landing	Isabela Sur	Isabela	West	9.18	-1.02	-91.1	1	6	0.0383333
343	Villamil	Oct	2002	21.6	Day	Landing	Isabela Sur	Isabela	West	9.18	-1.02	-91.1	1	5	0.272
344	Villamil	Oct	2002	21.6	Day	Landing	Isabela Sur	Isabela	West	9.18	-1.02	-91.1	1	3	0.0766667
345	Villamil	Oct	2002	21.6	Day	Landing	Isabela Sur	Isabela	West	9.18	-1.02	-91.1	1	5	0.088
346	Villamil	Oct	2002	21.6	Day	Landing	Isabela Sur	Isabela	West	9.18	-1.02	-91.1	1	4	0.0575
347	Villamil	Oct	2002	21.6	Day	Landing	Isabela Sur	Isabela	West	9.18	-1.02	-91.1	1	5	0.77
348	Villamil	Oct	2002	21.6	Day	Landing	Isabela Sur	Isabela	West	9.18	-1.02	-91.1	1	4	0.34
349	Villamil	Oct	2002	21.6	Day	Landing	Isabela Sur	Isabela	West	9.18	-1.02	-91.1	1	4	1.53
350	Villamil	Oct	2002	21.6	Day	Landing	Isabela Sur	Isabela	West	9.18	-1.02	-91.1	1	5	0.362
351	Villamil	Oct	2002	21.6	Day	Landing	Isabela Sur	Isabela	West	9.18	-1.02	-91.1	1	4	0.68
352	Villamil	Oct	2002	21.6	Day	Landing	Isabela Sur	Isabela	West	9.18	-1.02	-91.1	1	4	3.175
353	Villamil	Oct	2002	21.6	Day	Landing	Isabela Sur	Isabela	West	9.18	-1.02	-91.1	1	4	0.2825
354	Villamil	Oct	2002	21.6	Day	Landing	Isabela Sur	Isabela	West	9.18	-1.02	-91.1	1	5	0.546
355	Villamil	Oct	2002	21.6	Day	Landing	Isabela Sur	Isabela	West	9.18	-1.02	-91.1	1	6	0.226667
356	Villamil	Oct	2002	21.6	Day	Landing	Isabela Sur	Isabela	West	9.18	-1.02	-91.1	2	4	0.28375
357	Villamil	Oct	2002	21.6	Day	Landing	Isabela Sur	Isabela	West	9.18	-1.02	-91.1	1	4	0.7375
358	Villamil	Oct	2002	21.6	Day	Landing	Isabela Sur	Isabela	West	9.18	-1.02	-91.1	1	4	0.1125
359	Villamil	Oct	2002	21.6	Day	Landing	Isabela Sur	Isabela	West	9.18	-1.02	-91.1	1	3	0.83
360	Villamil	Oct	2002	21.6	Day	Landing	Isabela Sur	Isabela	West	9.18	-1.02	-91.1	1	4	0.6225
361	Villamil	Oct	2002	21.6	Day	Landing	Isabela Sur	Isabela	West	9.18	-1.02	-91.1	2	4	0.05625
362	Villamil	Oct	2002	21.6	Day	Landing	Isabela Sur	Isabela	West	9.18	-1.02	-91.1	1	4	0.1125
363	Villamil	Oct	2002	21.6	Day	Landing	Isabela Sur	Isabela	West	9.18	-1.02	-91.1	1	4	0.68
364	Villamil	Oct	2002	21.6	Day	Landing	Isabela Sur	Isabela	West	9.18	-1.02	-91.1	1	5	0.136
365	Villamil	Oct	2002	21.6	Day	Landing	Isabela Sur	Isabela	West	9.18	-1.02	-91.1	1	5	1.27
366	Villamil	Oct	2002	21.6	Day	Landing	Isabela Sur	Isabela	West	1.21	-0.978203	-90.9576	1	4	0.2275
367	Villamil	Oct	2002	21.6	Day	Landing	Isabela Sur	Isabela	West	1.21	-0.978203	-90.9576	1	5	0.046
368	Villamil	Oct	2002	21.6	Day	Landing	Isabela Sur	Isabela	West	1.21	-0.978203	-90.9576	1	5	0.09
369	Villamil	Oct	2002	21.6	Day	Landing	Isabela Sur	Isabela	West	1.21	-0.978203	-90.9576	1	4	0.68
370	Villamil	Oct	2002	21.6	Day	Landing	Isabela Sur	Isabela	West	1.21	-0.978203	-90.9576	1	5	0.318
371	Villamil	Oct	2002	21.6	Day	Landing	Isabela Sur	Isabela	West	1.21	-0.978203	-90.9576	2	4	0.48125
372	Villamil	Oct	2002	21.6	Day	Landing	Isabela Sur	Isabela	West	1.21	-0.978203	-90.9576	1	5	1.134
373	Villamil	Oct	2002	21.6	Day	Landing	Isabela Sur	Isabela	West	1.21	-0.978203	-90.9576	1	5	0.09
374	Villamil	Oct	2002	21.6	Day	Landing	Isabela Sur	Isabela	West	1.21	-0.978203	-90.9576	1	5	0.136
375	Villamil	Oct	2002	21.6	Day	Landing	Isabela Sur	Isabela	West	1.21	-0.978203	-90.9576	2	4	0.36875
376	Villamil	Oct	2002	21.6	Day	Landing	Isabela Sur	Isabela	West	1.21	-0.978203	-90.9576	2	4	0.05625
377	Villamil	Oct	2002	21.6	Night	Landing	Isabela Sur	Isabela	West	1.21	-0.978203	-90.9576	1	3	1.28333
378	Villamil	Oct	2002	21.6	Day	Landing	Isabela Sur	Isabela	West	1.21	-0.978203	-90.9576	1	4.5	1.05778
379	Villamil	Oct	2002	21.6	Day	Landing	Isabela Sur	Isabela	West	2.1	-0.9711	-90.9343	1	4	0.6225
380	Villamil	Oct	2002	21.6	Night	Landing	Isabela Sur	Isabela	West	2.1	-0.9711	-90.9343	1	3	2.42
381	Villamil	Oct	2002	21.6	Day	Landing	Isabela Sur	Isabela	West	2.1	-0.9711	-90.9343	1	4	0.2175
382	Villamil	Oct	2002	21.6	Day	Landing	Isabela Sur	Isabela	West	2.1	-0.9711	-90.9343	1	3	0.453333
383	Villamil	Oct	2002	21.6	Day	Landing	Isabela Sur	Isabela	West	2.1	-0.9711	-90.9343	1	5	0.272
384	Villamil	Oct	2002	21.6	Day	Landing	Isabela Sur	Isabela	West	2.1	-0.9711	-90.9343	1	4	0.9075
385	Villamil	Oct	2002	21.6	Night	Landing	Isabela Sur	Isabela	West	2.1	-0.9711	-90.9343	2	2	1.5875
386	Villamil	Oct	2002	21.6	Night	Landing	Isabela Sur	Isabela	West	2.1	-0.9711	-90.9343	1	4	1.025
387	Villamil	Oct	2002	21.6	Day	Landing	Isabela Sur	Isabela	West	2.1	-0.9711	-90.9343	1	3	0.0766667
388	Villamil	Oct	2002	21.6	Day	Landing	Isabela Sur	Isabela	West	2.1	-0.9711	-90.9343	2	4	0.19875
389	Villamil	Oct	2002	21.6	Day	Landing	Isabela Sur	Isabela	West	2.1	-0.9711	-90.9343	2	4	0.255
390	Villamil	Oct	2002	21.6	Day	Landing	Isabela Sur	Isabela	West	14.9	-1.04912	-91.1846	1	6	1.965
391	Villamil	Oct	2002	21.6	Day	Landing	Isabela Sur	Isabela	West	14.9	-1.04912	-91.1846	2	5	0.181
392	Villamil	Oct	2002	21.6	Day	Landing	Isabela Sur	Isabela	West	14.9	-1.04912	-91.1846	2	8	0.991875
393	Villamil	Oct	2002	21.6	Day	Landing	Isabela Sur	Isabela	West	14.9	-1.04912	-91.1846	2	10	0.329
394	Villamil	Oct	2002	21.6	Night	Landing	Isabela Sur	Isabela	West	14.9	-1.04912	-91.1846	1	3	0.376667
395	Villamil	Oct	2002	21.6	Day	Landing	Isabela Sur	Isabela	West	14.9	-1.04912	-91.1846	2	18	0.863889
396	Villamil	Oct	2002	21.6	Day	Landing	Isabela Sur	Isabela	West	14.9	-1.04912	-91.1846	2	6	1.965
397	Villamil	Oct	2002	21.6	Day	Landing	Isabela Sur	Isabela	West	14.9	-1.04912	-91.1846	2	9	0.881667
398	Villamil	Oct	2002	21.6	Day	Landing	Isabela Sur	Isabela	West	14.9	-1.04912	-91.1846	1	25	0.8888
399	Villamil	Oct	2002	21.6	Day	Landing	Isabela Sur	Isabela	West	14.9	-1.04912	-91.1846	2	15	1.111
400	Villamil	Oct	2002	21.6	Day	Landing	Isabela Sur	Isabela	West	14.9	-1.04912	-91.1846	1	15	0.574667
401	Villamil	Oct	2002	21.6	Night	Landing	Isabela Sur	Isabela	West	14.9	-1.04912	-91.1846	2	3	0.301667
402	Villamil	Oct	2002	21.6	Night	Landing	Isabela Sur	Isabela	West	33	-0.98813	-91.457	2	3	1.43667
403	Villamil	Oct	2002	21.6	Day	Landing	Isabela Sur	Isabela	West	6.56	-1.01864	-91.0558	1	5	0.272
404	Villamil	Oct	2002	21.6	Day	Landing	Isabela Sur	Isabela	West	6.56	-1.01864	-91.0558	2	4	0.28375
405	Villamil	Oct	2002	21.6	Day	Landing	Isabela Sur	Isabela	West	6.56	-1.01864	-91.0558	2	4	0.02875
406	Villamil	Oct	2002	21.6	Day	Landing	Isabela Sur	Isabela	West	6.56	-1.01864	-91.0558	1	4	0.0575
407	Villamil	Oct	2002	21.6	Day	Landing	Isabela Sur	Isabela	West	6.56	-1.01864	-91.0558	1	4	0.4525
408	Villamil	Oct	2002	21.6	Day	Landing	Isabela Sur	Isabela	West	6.56	-1.01864	-91.0558	1	4	0.0575
409	Villamil	Oct	2002	21.6	Day	Landing	Isabela Sur	Isabela	West	6.56	-1.01864	-91.0558	1	4	0.2275
410	Villamil	Oct	2002	21.6	Day	Landing	Isabela Sur	Isabela	West	6.56	-1.01864	-91.0558	1	4	0.0575
411	Villamil	Oct	2002	21.6	Day	Landing	Isabela Sur	Isabela	West	6.56	-1.01864	-91.0558	1	4	0.2275
412	Villamil	Oct	2002	21.6	Day	Landing	Isabela Sur	Isabela	West	6.56	-1.01864	-91.0558	1	4	0.0575
413	Villamil	Oct	2002	21.6	Night	Landing	Isabela Sur	Isabela	West	8.1	-0.92	-90.85	1	4	3.175
414	Villamil	Oct	2002	21.6	Day	Landing	Isabela Sur	Isabela	West	8.1	-0.92	-90.85	1	4	0.1125
415	Villamil	Oct	2002	21.6	Day	Landing	Isabela Sur	Isabela	West	9.22	-1.03944	-91.0943	1	4	0.2825
416	Villamil	Oct	2002	21.6	Night	Landing	Isabela Sur	Isabela	West	9.22	-1.03944	-91.0943	1	4	2.04
417	Villamil	Oct	2002	21.6	Day	Landing	Isabela Sur	Isabela	West	18	-1.0358	-91.2282	2	10	0.567
418	Villamil	Oct	2002	21.6	Day	Landing	Isabela Sur	Isabela	West	18	-1.0358	-91.2282	1	5	0.908
419	Villamil	Oct	2002	21.6	Day	Landing	Isabela Sur	Isabela	West	18	-1.0358	-91.2282	2	15	0.438333
420	Villamil	Oct	2002	21.6	Day	Landing	Isabela Sur	Isabela	West	18	-1.0358	-91.2282	1	3	1.66333
421	Villamil	Oct	2002	21.6	Day	Observer	Isabela Sur	Isabela	West	18	-1.0469	-91.2041	1	3	0.233333
422	Villamil	Oct	2002	21.6	Night	Landing	Isabela Sur	Isabela	West	18	-1.0358	-91.2282	1	4	1.5875
423	Villamil	Oct	2002	21.6	Day	Observer	Isabela Sur	Isabela	West	18	-1.0358	-91.2282	2	3	1.66333
424	Villamil	Oct	2002	21.6	Day	Landing	Isabela Sur	Isabela	West	18	-1.0358	-91.2282	1	3	0.226667
425	Villamil	Oct	2002	21.6	Day	Landing	Isabela Sur	Isabela	West	18	-1.0358	-91.2282	1	20	0.2495
426	Villamil	Oct	2002	21.6	Night	Landing	Isabela Sur	Isabela	West	18	-1.0358	-91.2282	2	3	1.43667
427	Villamil	Oct	2002	21.6	Day	Landing	Isabela Sur	Isabela	West	18	-1.0358	-91.2282	1	3	0.603333
428	Villamil	Oct	2002	21.6	Day	Landing	Isabela Sur	Isabela	West	18	-1.0358	-91.2282	1	3	0.15
429	Villamil	Oct	2002	21.6	Night	Landing	Isabela Sur	Isabela	West	18	-1.0358	-91.2282	1	3	2.72
430	Villamil	Oct	2002	21.6	Day	Observer	Isabela Sur	Isabela	West	18	-1.03283	-91.2254	2	3	1.73833
431	Villamil	Oct	2002	21.6	Day	Landing	Isabela Sur	Isabela	West	18	-1.0358	-91.2282	1	3	3.25
432	Villamil	Oct	2002	21.6	Night	Landing	Isabela Sur	Isabela	West	18	-1.0358	-91.2282	2	3	1.51667
433	Villamil	Oct	2002	21.6	Day	Landing	Isabela Sur	Isabela	West	18	-1.0358	-91.2282	1	20	0.136
434	Villamil	Oct	2002	21.6	Day	Observer	Isabela Sur	Isabela	West	18	-1.03269	-91.2244	1	3	0.756667
435	Villamil	Oct	2002	21.6	Night	Landing	Isabela Sur	Isabela	West	18	-1.0358	-91.2282	2	2	4.195
436	Villamil	Oct	2002	21.6	Day	Landing	Isabela Sur	Isabela	West	18	-1.0358	-91.2282	1	15	0.468667
437	Ayora	Nov	2002	22.6	Day	Observer	Darwin	Darwin	North	194	1.67443	-91.988	2	6	0.583333
438	Ayora	Nov	2002	22.6	Night	Observer	Darwin	Darwin	North	194	1.68113	-92.0069	2	5	1
439	Ayora	Nov	2002	22.6	Day	Observer	Darwin	Darwin	North	194	1.6817	-92.0062	2	2	0.5
440	Ayora	Nov	2002	22.6	Night	Observer	Darwin	Darwin	North	193	1.67443	-91.988	2	4	0.625
441	Ayora	Nov	2002	22.6	Night	Observer	Darwin	Darwin	North	194	1.68113	-92.0069	2	5	1
442	Ayora	Nov	2002	22.6	Night	Observer	Darwin	Darwin	North	184	1.50014	-91.9143	6	4	0.583333
443	Baquerizo	Nov	2002	23.2	Night	Observer	Española	Española	Centre- South	36.6	-1.21044	-89.4309	1	4	2.1575
444	Baquerizo	Nov	2002	23.2	Night	Observer	Española	Española	Centre- South	35.4	-1.36813	-89.7406	2	3	1.13333
445	Baquerizo	Nov	2002	23.2	Night	Landing	Española	Española	Centre- South	36.6	-1.3477	-89.6749	3	22	0.583939
446	Baquerizo	Nov	2002	23.2	Night	Landing	Española	Española	Centre- South	36.6	-1.3477	-89.6749	3	23	0.46
447	Baquerizo	Nov	2002	23.2	Night	Landing	Española	Española	Centre- South	36.6	-1.3477	-89.6749	5	60	0.2118
448	Ayora	Nov	2002	22.4	Day	Landing	Fernandina	Fernandina	West	123	-0.2965	-91.6315	6	6	0.5
449	Ayora	Nov	2002	22.4	Day	Landing	Fernandina	Fernandina	West	132	-0.282398	-91.5249	6	7	0.357143
450	Ayora	Nov	2002	23.2	Night	Landing	Floreana	Floreana	Centre- South	34	-1.3141	-90.3769	2	4	2.7875
451	Villamil	Nov	2002	23.2	Day	Landing	Floreana	Floreana	Centre- South	33.7	-1.2301	-90.4723	1	10	0.816
452	Baquerizo	Nov	2002	23.2	Night	Landing	Floreana	Floreana	Centre- South	69.2	-1.2881	-90.4968	1	5	2.09067
453	Baquerizo	Nov	2002	23.2	Night	Observer	Floreana	Floreana	Centre- South	71.8	-1.31943	-90.509	1	7	1.36286
454	Baquerizo	Nov	2002	23.2	Night	Observer	Floreana	Floreana	Centre- South	71.8	-1.1811	-90.303	1	6	0.908333
455	Baquerizo	Nov	2002	23.2	Night	Observer	Floreana	Floreana	Centre- South	71.8	-1.19487	-90.3063	1	4	0.795
456	Baquerizo	Nov	2002	23.2	Night	Observer	Floreana	Floreana	Centre- South	71.8	-1.31943	-90.509	1	6	1.21167
457	Baquerizo	Nov	2002	23.2	Night	Observer	Floreana	Floreana	Centre- South	69.7	-1.30332	-90.3846	2	5	0.636
458	Baquerizo	Nov	2002	23.2	Night	Observer	Floreana	Floreana	Centre- South	69.7	-1.30332	-90.3846	2	5	1.86
459	Baquerizo	Nov	2002	23.2	Night	Observer	Floreana	Floreana	Centre- South	60.4	-1.3141	-90.3769	2	5	1.5
460	Baquerizo	Nov	2002	23.2	Night	Observer	Floreana	Floreana	Centre- South	60.4	-1.3141	-90.3769	2	5	1.59
461	Baquerizo	Nov	2002	23.2	Night	Observer	Floreana	Floreana	Centre- South	65.2	-1.23613	-90.4799	1	5	1.62
462	Baquerizo	Nov	2002	23.2	Night	Observer	Floreana	Floreana	Centre- South	60.5	-1.29001	-90.4992	1	4	4.885
463	Baquerizo	Nov	2002	23.2	Night	Observer	Floreana	Floreana	Centre- South	71.8	-1.31943	-90.509	2	5	1.88
464	Baquerizo	Nov	2002	23.2	Night	Observer	Floreana	Floreana	Centre- South	60.5	-1.27653	-90.4886	2	5	0.754333
465	Baquerizo	Nov	2002	23.2	Night	Observer	Floreana	Floreana	Centre- South	63.7	-1.2301	-90.4723	1	5	2.454
466	Baquerizo	Nov	2002	23.2	Night	Observer	Floreana	Floreana	Centre- South	60.4	-1.3141	-90.3769	1	5	0.908
467	Baquerizo	Nov	2002	23.2	Night	Observer	Floreana	Floreana	Centre- South	69.7	-1.30332	-90.3846	1	5	1.9
468	Baquerizo	Nov	2002	23.2	Night	Observer	Floreana	Floreana	Centre- South	60.4	-1.23015	-90.4793	1	5	0.506667
469	Baquerizo	Nov	2002	23.2	Night	Observer	Floreana	Floreana	Centre- South	61.7	-1.2137	-90.449	1	7	0.194286
470	Baquerizo	Nov	2002	23.2	Night	Observer	Floreana	Floreana	Centre- South	60.4	-1.3141	-90.3769	2	5	1
471	Baquerizo	Nov	2002	23.2	Night	Observer	Floreana	Floreana	Centre- South	60.9	-1.2206	-90.428	1	5	0.726
472	Baquerizo	Nov	2002	23.2	Night	Observer	Floreana	Floreana	Centre- South	57.7	-1.31779	-90.3343	1	5	0.272
473	Baquerizo	Nov	2002	23.2	Night	Observer	Floreana	Floreana	Centre- South	69.7	-1.30332	-90.3846	1	5	1.8
474	Baquerizo	Nov	2002	23.2	Night	Observer	Floreana	Floreana	Centre- South	60.4	-1.25209	-90.4908	1	4	0.5125
475	Baquerizo	Nov	2002	23.2	Night	Observer	Floreana	Floreana	Centre- South	71.8	-1.31943	-90.509	1	5	1.272
476	Baquerizo	Nov	2002	23.2	Night	Observer	Floreana	Floreana	Centre- South	61.7	-1.2137	-90.449	1	6	0.516667
477	Ayora	Nov	2002	24.3	Night	Observer	Isabela Norte y Este	Isabela	West	113	-0.27378	-91.6237	2	2	0.625
478	Ayora	Nov	2002	24.3	Night	Landing	Isabela Norte y Este	Isabela	West	47.3	-0.4944	-90.95	4	13	0.176923
479	Ayora	Nov	2002	24.3	Night	Landing	Isabela Norte y Este	Isabela	West	113	0.271987	-91.6254	4	3	2.19167
480	Ayora	Nov	2002	24.3	Night	Landing	Isabela Norte y Este	Isabela	West	76.9	-0.017	-91.1991	4	8	0.203125
481	Ayora	Nov	2002	24.3	Night	Landing	Isabela Norte y Este	Isabela	West	93.4	0.1341	-91.3921	6	7	0.809524
482	Ayora	Nov	2002	24.3	Night	Landing	Isabela Norte y Este	Isabela	West	104	0.06442	-91.5048	6	7	1.78571
483	Ayora	Nov	2002	24.3	Night	Landing	Isabela Norte y Este	Isabela	West	90.6	0.1711	-91.3558	6	7	0.238095
484	Ayora	Nov	2002	24.3	Night	Landing	Isabela Norte y Este	Isabela	West	76.9	-0.017	-91.1991	6	7	1.04762
485	Ayora	Nov	2002	24.3	Night	Landing	Isabela Norte y Este	Isabela	West	67.5	-0.218	-91.1731	6	7	0.309524
486	Ayora	Nov	2002	24.3	Night	Observer	Isabela Norte y Este	Isabela	West	113	0.271987	-91.6254	6	2	0.25
487	Ayora	Nov	2002	24.3	Day	Landing	Isabela Norte y Este	Isabela	West	90.6	0.1711	-91.3558	6	8	0.625
488	Ayora	Nov	2002	23.7	Night	Landing	Isabela Oeste	Isabela	West	97.6	-0.74136	-91.3916	6	7	0.238095
489	Ayora	Nov	2002	23.7	Night	Landing	Isabela Oeste	Isabela	West	103	-0.6832	-91.325	6	7	0.214286
490	Ayora	Nov	2002	23.7	Night	Landing	Isabela Oeste	Isabela	West	113	-0.49371	-91.2054	6	7	0.714286
491	Ayora	Nov	2002	23.7	Night	Landing	Isabela Oeste	Isabela	West	49.6	-0.37086	-91.282	6	7	1.11905
492	Ayora	Nov	2002	23.7	Night	Landing	Isabela Oeste	Isabela	West	114	-0.02971	-91.5757	6	7	0.952381
493	Ayora	Nov	2002	23.7	Day	Landing	Isabela Oeste	Isabela	West	49.6	-0.37086	-91.282	6	9	0.462963
494	Villamil	Nov	2002	23.7	Day	Landing	Isabela Oeste	Isabela	West	76.7	-0.43544	-91.2364	2	18	2.425
495	Villamil	Nov	2002	23.7	Day	Landing	Isabela Oeste	Isabela	West	76.7	-0.43544	-91.2364	1	20	2.625
496	Villamil	Nov	2002	23.7	Day	Observer	Isabela Oeste	Isabela	West	76.7	-0.43544	-91.2364	2	3	1.21667
497	Villamil	Nov	2002	23.7	Night	Observer	Isabela Oeste	Isabela	West	76.7	-0.43544	-91.2364	2	2	2.325
498	Villamil	Nov	2002	23.7	Day	Observer	Isabela Oeste	Isabela	West	76.7	-0.43544	-91.2364	1	3	0.9
499	Villamil	Nov	2002	23.7	Night	Observer	Isabela Oeste	Isabela	West	76.7	-0.23163	-91.1454	1	2	3.85
500	Villamil	Nov	2002	23.7	Day	Observer	Isabela Oeste	Isabela	West	75.5	-0.37086	-91.6116	2	1	0.25
501	Villamil	Nov	2002	23.7	Night	Observer	Isabela Oeste	Isabela	West	75.5	-0.37086	-91.6116	2	3	1.81667
502	Villamil	Nov	2002	23.7	Night	Observer	Isabela Oeste	Isabela	West	75.5	-0.37086	-91.6116	2	2	2.2
503	Villamil	Nov	2002	23.7	Day	Observer	Isabela Oeste	Isabela	West	75.5	-0.37086	-91.6116	2	3	1.81667
504	Villamil	Nov	2002	23.7	Night	Observer	Isabela Oeste	Isabela	West	75.5	-0.37086	-91.6116	1	3	0.466667
505	Villamil	Nov	2002	23.7	Night	Observer	Isabela Oeste	Isabela	West	75.5	-0.37086	-91.6116	1	1	0.9
506	Villamil	Nov	2002	23.7	Day	Observer	Isabela Oeste	Isabela	West	75.5	-0.37086	-91.6116	1	2	0.25
507	Villamil	Nov	2002	23.7	Day	Observer	Isabela Oeste	Isabela	West	75.5	-0.37086	-91.6116	1	3	0.9
508	Villamil	Nov	2002	23.7	Night	Observer	Isabela Oeste	Isabela	West	75.5	-0.37086	-91.6116	1	3	0.3
509	Villamil	Nov	2002	23.7	Day	Observer	Isabela Oeste	Isabela	West	75.5	-0.21258	-91.1651	1	3	0.233333
510	Villamil	Nov	2002	23.7	Day	Observer	Isabela Oeste	Isabela	West	75.5	-0.21228	-91.176	1	3	0.233333
511	Villamil	Nov	2002	23.7	Day	Observer	Isabela Oeste	Isabela	West	59.4	-0.6832	-91.325	2	3	0.0833333
512	Villamil	Nov	2002	23.7	Day	Observer	Isabela Oeste	Isabela	West	59.4	-0.6832	-91.325	1	3	2.56667
513	Villamil	Nov	2002	23.7	Day	Observer	Isabela Oeste	Isabela	West	59.4	-0.6832	-91.325	1	3	0.3
514	Villamil	Nov	2002	23.7	Day	Observer	Isabela Oeste	Isabela	West	59.4	-0.26044	-91.2329	1	3	2.26667
515	Baquerizo	Nov	2002	23.7	Night	Observer	Isabela Oeste	Isabela	West	157	-1.25209	-90.4908	2	5	0.633333
516	Ayora	Nov	2002	23.3	Night	Landing	Isabela Sur	Isabela	West	79	-0.95519	-91.461	6	7	0.738095
517	Ayora	Nov	2002	23.3	Night	Landing	Isabela Sur	Isabela	West	88	-0.84428	-91.4873	6	7	0.119048
518	Villamil	Nov	2002	23.3	Day	Landing	Isabela Sur	Isabela	West	3.7	-0.99697	-91.016	1	3	0.15
519	Villamil	Nov	2002	23.3	Day	Landing	Isabela Sur	Isabela	West	3.7	-0.99697	-91.016	1	4	1.2
520	Villamil	Nov	2002	23.3	Night	Landing	Isabela Sur	Isabela	West	17	-0.79173	-90.8193	1	3	1.36
521	Villamil	Nov	2002	23.3	Night	Landing	Isabela Sur	Isabela	West	17	-0.79173	-90.8193	1	3	3.1
522	Villamil	Nov	2002	23.3	Day	Landing	Isabela Sur	Isabela	West	4.83	-1.0041	-91.039	1	3	0.906667
523	Villamil	Nov	2002	23.3	Day	Landing	Isabela Sur	Isabela	West	4.83	-1.0041	-91.039	1	5	0.226
524	Villamil	Nov	2002	23.3	Day	Landing	Isabela Sur	Isabela	West	4.83	-1.0041	-91.039	1	3	0.15
525	Villamil	Nov	2002	23.3	Day	Landing	Isabela Sur	Isabela	West	4.83	-1.0041	-91.039	1	3	0.0766667
526	Villamil	Nov	2002	23.3	Day	Landing	Isabela Sur	Isabela	West	4.83	-1.0041	-91.039	1	3	1.66333
527	Villamil	Nov	2002	23.3	Night	Landing	Isabela Sur	Isabela	West	4.83	-1.0041	-91.039	2	2	1.2475
528	Villamil	Nov	2002	23.3	Night	Landing	Isabela Sur	Isabela	West	4.83	-1.0041	-91.039	1	2	3.63
529	Villamil	Nov	2002	23.3	Night	Landing	Isabela Sur	Isabela	West	4.83	-1.0041	-91.039	1	6	0.566667
530	Villamil	Nov	2002	23.3	Day	Landing	Isabela Sur	Isabela	West	4.83	-1.0041	-91.039	1	3	0.53
531	Villamil	Nov	2002	23.3	Day	Landing	Isabela Sur	Isabela	West	4.83	-1.0041	-91.039	2	5	0.023
532	Villamil	Nov	2002	23.3	Night	Landing	Isabela Sur	Isabela	West	4.83	-1.0041	-91.039	1	3	0.3
533	Villamil	Nov	2002	23.3	Day	Landing	Isabela Sur	Isabela	West	4.83	-1.0041	-91.039	1	4	0.175
534	Villamil	Nov	2002	23.3	Day	Landing	Isabela Sur	Isabela	West	4.83	-1.0041	-91.039	1	4	0.45
535	Villamil	Nov	2002	23.3	Day	Landing	Isabela Sur	Isabela	West	4.83	-1.0041	-91.039	1	4	0.175
536	Villamil	Nov	2002	23.3	Day	Landing	Isabela Sur	Isabela	West	4.83	-1.0041	-91.039	1	4	0.025
537	Villamil	Nov	2002	23.3	Day	Landing	Isabela Sur	Isabela	West	4.83	-1.0041	-91.039	1	4	1.075
538	Villamil	Nov	2002	23.3	Day	Landing	Isabela Sur	Isabela	West	4.83	-1.0041	-91.039	1	4	0.5
539	Villamil	Nov	2002	23.3	Day	Landing	Isabela Sur	Isabela	West	4.83	-1.0041	-91.039	1	4	1.3
540	Villamil	Nov	2002	23.3	Day	Landing	Isabela Sur	Isabela	West	4.83	-1.0041	-91.039	1	4	1.125
541	Villamil	Nov	2002	23.3	Day	Landing	Isabela Sur	Isabela	West	4.83	-1.0041	-91.039	2	4	0.025
542	Villamil	Nov	2002	23.3	Day	Landing	Isabela Sur	Isabela	West	4.83	-1.0041	-91.039	1	5	0.4
543	Villamil	Nov	2002	23.3	Day	Landing	Isabela Sur	Isabela	West	4.83	-1.0041	-91.039	1	4	0.675
544	Villamil	Nov	2002	23.3	Day	Landing	Isabela Sur	Isabela	West	4.83	-1.0041	-91.039	1	4	0.275
545	Villamil	Nov	2002	23.3	Day	Landing	Isabela Sur	Isabela	West	4.83	-1.0041	-91.039	1	4	0.35
546	Villamil	Nov	2002	23.3	Day	Landing	Isabela Sur	Isabela	West	4.83	-1.0041	-91.039	1	4	0.225
547	Villamil	Nov	2002	23.3	Night	Landing	Isabela Sur	Isabela	West	4.83	-1.0041	-91.039	1	3	1.2
548	Villamil	Nov	2002	23.3	Day	Landing	Isabela Sur	Isabela	West	14.7	-1.05069	-91.1743	1	10	2.404
549	Villamil	Nov	2002	23.3	Day	Landing	Isabela Sur	Isabela	West	14.7	-1.05069	-91.1743	1	10	1.769
550	Villamil	Nov	2002	23.3	Day	Landing	Isabela Sur	Isabela	West	14.7	-1.05069	-91.1743	1	12	0.283333
551	Villamil	Nov	2002	23.3	Day	Landing	Isabela Sur	Isabela	West	14.7	-1.05069	-91.1743	1	12	0.741667
552	Villamil	Nov	2002	23.3	Day	Landing	Isabela Sur	Isabela	West	14.7	-1.05069	-91.1743	1	16	0.6125
553	Villamil	Nov	2002	23.3	Day	Landing	Isabela Sur	Isabela	West	14.7	-1.05069	-91.1743	1	14	1.72143
554	Villamil	Nov	2002	23.3	Day	Landing	Isabela Sur	Isabela	West	14.7	-1.05069	-91.1743	1	17	1.33529
555	Villamil	Nov	2002	23.3	Day	Landing	Isabela Sur	Isabela	West	14.7	-1.05069	-91.1743	2	4	0.1125
556	Villamil	Nov	2002	23.3	Day	Landing	Isabela Sur	Isabela	West	0.52	-0.96708	-90.9665	1	4	0.2825
557	Villamil	Nov	2002	23.3	Day	Landing	Isabela Sur	Isabela	West	0.52	-0.96708	-90.9665	1	5	1.134
558	Villamil	Nov	2002	23.3	Day	Landing	Isabela Sur	Isabela	West	0.52	-0.96708	-90.9665	1	5	0.046
559	Villamil	Nov	2002	23.3	Day	Landing	Isabela Sur	Isabela	West	0.52	-0.96708	-90.9665	1	4	0.51
560	Villamil	Nov	2002	23.3	Night	Landing	Isabela Sur	Isabela	West	0.52	-0.96708	-90.9665	1	3	0.756667
561	Villamil	Nov	2002	23.3	Day	Landing	Isabela Sur	Isabela	West	0.52	-0.96708	-90.9665	1	5	0.36
562	Villamil	Nov	2002	23.3	Night	Landing	Isabela Sur	Isabela	West	1.93	-0.97723	-90.988	1	3	0.756667
563	Villamil	Nov	2002	23.3	Day	Landing	Isabela Sur	Isabela	West	1.93	-0.97723	-90.988	1	4	0.17
564	Villamil	Nov	2002	23.3	Night	Landing	Isabela Sur	Isabela	West	1.93	-0.97723	-90.988	2	3	0.075
565	Villamil	Nov	2002	23.3	Night	Landing	Isabela Sur	Isabela	West	1.93	-0.97723	-90.988	1	3	0.3
566	Villamil	Nov	2002	23.3	Night	Observer	Isabela Sur	Isabela	West	12.2	-0.95531	-90.9663	1	4	2.04
567	Villamil	Nov	2002	23.3	Night	Landing	Isabela Sur	Isabela	West	12.2	-1.0394	-91.1467	2	5	0.816
568	Villamil	Nov	2002	23.3	Day	Observer	Isabela Sur	Isabela	West	12.2	-1.04603	-91.158	1	9	1.51222
569	Villamil	Nov	2002	23.3	Day	Landing	Isabela Sur	Isabela	West	12.2	-1.0394	-91.1467	2	9	0.277222
570	Villamil	Nov	2002	23.3	Day	Landing	Isabela Sur	Isabela	West	12.2	-1.0394	-91.1467	1	8	0.025
571	Villamil	Nov	2002	23.3	Day	Observer	Isabela Sur	Isabela	West	12.2	-1.04069	-91.1578	1	5	0.272
572	Villamil	Nov	2002	23.3	Day	Landing	Isabela Sur	Isabela	West	12.2	-1.0394	-91.1467	2	12	0.0208333
573	Villamil	Nov	2002	23.3	Day	Landing	Isabela Sur	Isabela	West	12.2	-1.0394	-91.1467	1	15	1.12
574	Villamil	Nov	2002	23.3	Day	Observer	Isabela Sur	Isabela	West	12.2	-1.04444	-91.1611	1	4	1.925
575	Villamil	Nov	2002	23.3	Day	Observer	Isabela Sur	Isabela	West	12.2	-1.03996	-91.1578	1	8	0.8
576	Villamil	Nov	2002	23.3	Day	Observer	Isabela Sur	Isabela	West	12.2	-1.0394	-91.1467	1	8	0.85
577	Villamil	Nov	2002	23.3	Day	Observer	Isabela Sur	Isabela	West	12.2	-1.05276	-91.1753	1	8	0.55
578	Villamil	Nov	2002	23.3	Night	Observer	Isabela Sur	Isabela	West	12.2	-1.03759	-91.1527	1	4	0.8
579	Villamil	Nov	2002	23.3	Day	Observer	Isabela Sur	Isabela	West	12.2	-1.0394	-91.1467	1	9	0.911111
580	Villamil	Nov	2002	23.3	Day	Landing	Isabela Sur	Isabela	West	22.7	-0.72072	-90.8072	1	4	1.425
581	Villamil	Nov	2002	23.3	Night	Landing	Isabela Sur	Isabela	West	34.2	-0.95519	-91.461	1	2	3.175
582	Villamil	Nov	2002	23.3	Day	Landing	Isabela Sur	Isabela	West	34.2	-0.95519	-91.461	2	3	3.175
583	Villamil	Nov	2002	23.3	Night	Landing	Isabela Sur	Isabela	West	34.2	-0.95519	-91.461	1	2	2.95
584	Villamil	Nov	2002	23.3	Day	Landing	Isabela Sur	Isabela	West	34.2	-0.95519	-91.461	1	3	3.17333
585	Villamil	Nov	2002	23.3	Night	Landing	Isabela Sur	Isabela	West	34.2	-0.95519	-91.461	1	3	6.35
586	Villamil	Nov	2002	23.3	Day	Observer	Isabela Sur	Isabela	West	34.2	-0.97731	-91.4457	1	3	1.05667
587	Villamil	Nov	2002	23.3	Day	Landing	Isabela Sur	Isabela	West	34.2	-0.95519	-91.461	1	1	4.54
588	Villamil	Nov	2002	23.3	Day	Observer	Isabela Sur	Isabela	West	34.2	-0.94832	-91.4663	1	3	0.756667
589	Villamil	Nov	2002	23.3	Day	Landing	Isabela Sur	Isabela	West	34.2	-0.95519	-91.461	2	3	3.40167
590	Villamil	Nov	2002	23.3	Night	Landing	Isabela Sur	Isabela	West	34.2	-0.95519	-91.461	1	2	2.495
591	Villamil	Nov	2002	23.3	Day	Landing	Isabela Sur	Isabela	West	34.2	-0.95519	-91.461	1	3	2.42
592	Villamil	Nov	2002	23.3	Day	Landing	Isabela Sur	Isabela	West	34.2	-0.95519	-91.461	1	2	0.455
593	Villamil	Nov	2002	23.3	Day	Landing	Isabela Sur	Isabela	West	34.2	-0.95519	-91.461	2	2	2.495
594	Villamil	Nov	2002	23.3	Day	Landing	Isabela Sur	Isabela	West	34.2	-0.95519	-91.461	1	3	0.453333
595	Villamil	Nov	2002	23.3	Day	Landing	Isabela Sur	Isabela	West	34.2	-0.95519	-91.461	1	20	0.476
596	Villamil	Nov	2002	23.3	Day	Landing	Isabela Sur	Isabela	West	34.2	-0.95519	-91.461	1	4	0.7375
597	Villamil	Nov	2002	23.3	Day	Landing	Isabela Sur	Isabela	West	34.2	-0.95519	-91.461	1	16	0.41125
598	Villamil	Nov	2002	23.3	Day	Landing	Isabela Sur	Isabela	West	34.2	-0.95519	-91.461	2	20	0.3925
599	Villamil	Nov	2002	23.3	Day	Landing	Isabela Sur	Isabela	West	34.2	-0.95519	-91.461	1	32	0.9625
600	Villamil	Nov	2002	23.3	Day	Landing	Isabela Sur	Isabela	West	34.2	-0.95519	-91.461	1	40	0.5325
601	Villamil	Nov	2002	23.3	Day	Landing	Isabela Sur	Isabela	West	34.2	-0.95519	-91.461	2	40	0.91
602	Villamil	Nov	2002	23.3	Day	Observer	Isabela Sur	Isabela	West	34.2	-0.95519	-91.461	2	3	0.533333
603	Villamil	Nov	2002	23.3	Day	Observer	Isabela Sur	Isabela	West	34.2	-0.95519	-91.461	2	3	1.75
604	Villamil	Nov	2002	23.3	Day	Observer	Isabela Sur	Isabela	West	34.2	-0.95519	-91.461	2	3	1.75
605	Villamil	Nov	2002	23.3	Day	Observer	Isabela Sur	Isabela	West	34.2	-0.95519	-91.461	2	4	1.5375
606	Villamil	Nov	2002	23.3	Day	Observer	Isabela Sur	Isabela	West	34.2	-0.95519	-91.461	1	2	0.45
607	Villamil	Nov	2002	23.3	Night	Observer	Isabela Sur	Isabela	West	34.2	-0.95519	-91.461	1	3	1.06667
608	Villamil	Nov	2002	23.3	Day	Observer	Isabela Sur	Isabela	West	34.2	-0.95519	-91.461	1	3	1.5
609	Villamil	Nov	2002	23.3	Day	Observer	Isabela Sur	Isabela	West	34.2	-0.95519	-91.461	1	4	0.35
610	Villamil	Nov	2002	23.3	Day	Observer	Isabela Sur	Isabela	West	34.2	-0.95519	-91.461	1	3	1.66667
611	Villamil	Nov	2002	23.3	Day	Observer	Isabela Sur	Isabela	West	34.2	-0.95519	-91.461	1	4	0.35
612	Villamil	Nov	2002	23.3	Day	Observer	Isabela Sur	Isabela	West	34.2	-0.95519	-91.461	1	4	0.35
613	Villamil	Nov	2002	23.3	Day	Observer	Isabela Sur	Isabela	West	34.2	-0.97277	-91.4417	2	3	0.833333
614	Villamil	Nov	2002	23.3	Day	Observer	Isabela Sur	Isabela	West	34.2	-0.95519	-91.461	1	3	0.6
615	Villamil	Nov	2002	23.3	Day	Observer	Isabela Sur	Isabela	West	34.2	-0.95519	-91.461	1	3	0.3
616	Villamil	Nov	2002	23.3	Day	Landing	Isabela Sur	Isabela	West	9.18	-1.02	-91.1	1	5	1.044
617	Villamil	Nov	2002	23.3	Day	Landing	Isabela Sur	Isabela	West	9.18	-1.02	-91.1	2	4	0.085
618	Villamil	Nov	2002	23.3	Day	Landing	Isabela Sur	Isabela	West	9.18	-1.02	-91.1	1	5	0.49
619	Villamil	Nov	2002	23.3	Day	Landing	Isabela Sur	Isabela	West	9.18	-1.02	-91.1	1	5	1.27
620	Villamil	Nov	2002	23.3	Day	Landing	Isabela Sur	Isabela	West	9.18	-1.02	-91.1	1	4	0.5675
621	Villamil	Nov	2002	23.3	Day	Landing	Isabela Sur	Isabela	West	9.18	-1.02	-91.1	1	4	0.0575
622	Villamil	Nov	2002	23.3	Day	Landing	Isabela Sur	Isabela	West	9.18	-1.02	-91.1	1	4	0.0575
623	Villamil	Nov	2002	23.3	Night	Landing	Isabela Sur	Isabela	West	9.18	-1.02	-91.1	1	4	0.95
624	Villamil	Nov	2002	23.3	Day	Landing	Isabela Sur	Isabela	West	9.18	-1.02	-91.1	1	3	0.166667
625	Villamil	Nov	2002	23.3	Day	Landing	Isabela Sur	Isabela	West	9.18	-1.02	-91.1	1	5	0.46
626	Villamil	Nov	2002	23.3	Day	Landing	Isabela Sur	Isabela	West	9.18	-1.02	-91.1	1	4	1.25
627	Villamil	Nov	2002	23.3	Day	Landing	Isabela Sur	Isabela	West	9.18	-1.02	-91.1	1	4	0.575
628	Villamil	Nov	2002	23.3	Day	Landing	Isabela Sur	Isabela	West	1.21	-0.978203	-90.9576	1	3	2.04
629	Villamil	Nov	2002	23.3	Day	Landing	Isabela Sur	Isabela	West	1.21	-0.978203	-90.9576	1	4	0.5675
630	Villamil	Nov	2002	23.3	Day	Landing	Isabela Sur	Isabela	West	1.21	-0.978203	-90.9576	1	5	1.96
631	Villamil	Nov	2002	23.3	Day	Landing	Isabela Sur	Isabela	West	1.21	-0.978203	-90.9576	1	5	0.44
632	Villamil	Nov	2002	23.3	Day	Landing	Isabela Sur	Isabela	West	1.21	-0.978203	-90.9576	2	5	0.41
633	Villamil	Nov	2002	23.3	Day	Landing	Isabela Sur	Isabela	West	1.21	-0.978203	-90.9576	1	5	1.636
634	Villamil	Nov	2002	23.3	Day	Landing	Isabela Sur	Isabela	West	1.21	-0.978203	-90.9576	1	4	0.34
635	Villamil	Nov	2002	23.3	Day	Landing	Isabela Sur	Isabela	West	2.1	-0.9711	-90.9343	1	4	0.85
636	Villamil	Nov	2002	23.3	Night	Landing	Isabela Sur	Isabela	West	2.1	-0.9711	-90.9343	1	3	2.49333
637	Villamil	Nov	2002	23.3	Day	Landing	Isabela Sur	Isabela	West	2.1	-0.9711	-90.9343	1	5	0.544
638	Villamil	Nov	2002	23.3	Day	Landing	Isabela Sur	Isabela	West	2.1	-0.9711	-90.9343	1	4	0.625
639	Villamil	Nov	2002	23.3	Day	Landing	Isabela Sur	Isabela	West	2.1	-0.9711	-90.9343	1	4	0.795
640	Villamil	Nov	2002	23.3	Day	Landing	Isabela Sur	Isabela	West	2.1	-0.9711	-90.9343	1	4	0.625
641	Villamil	Nov	2002	23.3	Day	Landing	Isabela Sur	Isabela	West	2.1	-0.9711	-90.9343	1	4	1.075
642	Villamil	Nov	2002	23.3	Night	Landing	Isabela Sur	Isabela	West	2.1	-0.9711	-90.9343	2	2	0.05
643	Villamil	Nov	2002	23.3	Day	Landing	Isabela Sur	Isabela	West	14.3	-0.85295	-90.7848	2	10	0.5
644	Villamil	Nov	2002	23.3	Day	Landing	Isabela Sur	Isabela	West	14.9	-1.04912	-91.1846	1	4	0.1125
645	Villamil	Nov	2002	23.3	Day	Landing	Isabela Sur	Isabela	West	14.9	-1.04912	-91.1846	2	10	0.805
646	Villamil	Nov	2002	23.3	Day	Landing	Isabela Sur	Isabela	West	14.9	-1.04912	-91.1846	1	10	0.91
647	Villamil	Nov	2002	23.3	Day	Landing	Isabela Sur	Isabela	West	6.56	-1.01864	-91.0558	1	4	0.1125
648	Villamil	Nov	2002	23.3	Day	Landing	Isabela Sur	Isabela	West	6.56	-1.01864	-91.0558	1	5	1.36
649	Villamil	Nov	2002	23.3	Day	Landing	Isabela Sur	Isabela	West	6.56	-1.01864	-91.0558	1	4	0.1125
650	Villamil	Nov	2002	23.3	Day	Landing	Isabela Sur	Isabela	West	6.56	-1.01864	-91.0558	1	4	0.17
651	Villamil	Nov	2002	23.3	Day	Landing	Isabela Sur	Isabela	West	6.56	-1.01864	-91.0558	1	4	0.17
652	Villamil	Nov	2002	23.3	Night	Landing	Isabela Sur	Isabela	West	6.56	-1.01864	-91.0558	1	4	1.305
653	Villamil	Nov	2002	23.3	Day	Landing	Isabela Sur	Isabela	West	6.56	-1.01864	-91.0558	1	5	0.362
654	Villamil	Nov	2002	23.3	Day	Landing	Isabela Sur	Isabela	West	6.56	-1.01864	-91.0558	2	4	0.255
655	Villamil	Nov	2002	23.3	Day	Landing	Isabela Sur	Isabela	West	6.56	-1.01864	-91.0558	1	4	0.91
656	Villamil	Nov	2002	23.3	Day	Landing	Isabela Sur	Isabela	West	6.56	-1.01864	-91.0558	1	4	0.05
657	Villamil	Nov	2002	23.3	Day	Landing	Isabela Sur	Isabela	West	6.56	-1.01864	-91.0558	1	4	0.05
658	Villamil	Nov	2002	23.3	Night	Landing	Isabela Sur	Isabela	West	8.1	-0.92	-90.85	1	3	1.2
659	Villamil	Nov	2002	23.3	Day	Landing	Isabela Sur	Isabela	West	8.1	-0.92	-90.85	1	4	1.125
660	Villamil	Nov	2002	23.3	Day	Landing	Isabela Sur	Isabela	West	18	-1.0358	-91.2282	1	20	0.445
661	Villamil	Nov	2002	23.3	Day	Landing	Isabela Sur	Isabela	West	18	-1.0358	-91.2282	1	20	1.24
662	Villamil	Nov	2002	23.3	Day	Landing	Isabela Sur	Isabela	West	18	-1.0358	-91.2282	1	4	0.175
663	Baquerizo	Dec	2002	24.3	Night	Landing	Española	Española	Centre- South	33	1.3434	-89.6983	2	8	0.410625
664	Baquerizo	Dec	2002	24.3	Night	Landing	Española	Española	Centre- South	36.6	-1.3477	-89.6749	2	8	0.28125
665	Villamil	Dec	2002	24.3	Day	Landing	Isabela Oeste	Isabela	West	76.7	-0.43544	-91.2364	1	20	0.68
666	Villamil	Dec	2002	24.3	Day	Landing	Isabela Oeste	Isabela	West	77.3	-0.679682	-91.2618	1	30	0.0233333
667	Villamil	Dec	2002	23.7	Day	Landing	Isabela Sur	Isabela	West	3.7	-0.99697	-91.016	1	1	0.2
668	Villamil	Dec	2002	23.7	Day	Landing	Isabela Sur	Isabela	West	3.7	-0.99697	-91.016	2	5	0.05
669	Villamil	Dec	2002	23.7	Night	Landing	Isabela Sur	Isabela	West	1	-0.965	-90.976	1	3	0.366667
670	Villamil	Dec	2002	23.7	Day	Landing	Isabela Sur	Isabela	West	17	-0.79173	-90.8193	2	4	1.1375
671	Villamil	Dec	2002	23.7	Day	Landing	Isabela Sur	Isabela	West	17	-0.79173	-90.8193	1	3	4.16667
672	Villamil	Dec	2002	23.7	Day	Landing	Isabela Sur	Isabela	West	17	-0.79173	-90.8193	1	4	2.625
673	Villamil	Dec	2002	23.7	Day	Landing	Isabela Sur	Isabela	West	17	-0.79173	-90.8193	1	4	2.275
674	Villamil	Dec	2002	23.7	Night	Landing	Isabela Sur	Isabela	West	17	-0.79173	-90.8193	1	3	3.86667
675	Villamil	Dec	2002	23.7	Night	Landing	Isabela Sur	Isabela	West	17	-0.79173	-90.8193	1	4	3.25
676	Villamil	Dec	2002	23.7	Day	Landing	Isabela Sur	Isabela	West	4.83	-1.0041	-91.039	1	4	0.175
677	Villamil	Dec	2002	23.7	Day	Landing	Isabela Sur	Isabela	West	4.83	-1.0041	-91.039	1	4	1.25
678	Villamil	Dec	2002	23.7	Day	Landing	Isabela Sur	Isabela	West	4.83	-1.0041	-91.039	1	3	0.0666667
679	Villamil	Dec	2002	23.7	Day	Landing	Isabela Sur	Isabela	West	4.83	-1.0041	-91.039	1	4	0.05
680	Villamil	Dec	2002	23.7	Day	Landing	Isabela Sur	Isabela	West	4.83	-1.0041	-91.039	1	4	0.45
681	Villamil	Dec	2002	23.7	Day	Landing	Isabela Sur	Isabela	West	4.83	-1.0041	-91.039	1	4	0.5
682	Villamil	Dec	2002	23.7	Day	Landing	Isabela Sur	Isabela	West	4.83	-1.0041	-91.039	1	4	0.4
683	Villamil	Dec	2002	23.7	Day	Landing	Isabela Sur	Isabela	West	4.83	-1.0041	-91.039	1	4	0.45
684	Villamil	Dec	2002	23.7	Day	Landing	Isabela Sur	Isabela	West	4.83	-1.0041	-91.039	1	4	0.425
685	Villamil	Dec	2002	23.7	Day	Landing	Isabela Sur	Isabela	West	4.83	-1.0041	-91.039	1	4	0.45
686	Villamil	Dec	2002	23.7	Day	Landing	Isabela Sur	Isabela	West	4.83	-1.0041	-91.039	1	5	0.36
687	Villamil	Dec	2002	23.7	Day	Landing	Isabela Sur	Isabela	West	4.83	-1.0041	-91.039	1	4	0.75
688	Villamil	Dec	2002	23.7	Day	Landing	Isabela Sur	Isabela	West	4.83	-1.0041	-91.039	1	3	0.2
689	Villamil	Dec	2002	23.7	Day	Landing	Isabela Sur	Isabela	West	4.83	-1.0041	-91.039	1	3	0.3
690	Villamil	Dec	2002	23.7	Night	Landing	Isabela Sur	Isabela	West	4.83	-1.0041	-91.039	1	3	1.73333
691	Villamil	Dec	2002	23.7	Day	Landing	Isabela Sur	Isabela	West	4.83	-1.0041	-91.039	1	4	0.575
692	Villamil	Dec	2002	23.7	Day	Landing	Isabela Sur	Isabela	West	4.83	-1.0041	-91.039	1	4	0.35
693	Villamil	Dec	2002	23.7	Day	Landing	Isabela Sur	Isabela	West	4.83	-1.0041	-91.039	1	3	0.166667
694	Villamil	Dec	2002	23.7	Day	Landing	Isabela Sur	Isabela	West	4.83	-1.0041	-91.039	1	4	0.55
695	Villamil	Dec	2002	23.7	Day	Landing	Isabela Sur	Isabela	West	4.83	-1.0041	-91.039	1	5	0.1
696	Villamil	Dec	2002	23.7	Day	Landing	Isabela Sur	Isabela	West	4.83	-1.0041	-91.039	1	4	0.275
697	Villamil	Dec	2002	23.7	Night	Landing	Isabela Sur	Isabela	West	4.83	-1.0041	-91.039	1	3	0.466667
698	Villamil	Dec	2002	23.7	Day	Landing	Isabela Sur	Isabela	West	14.7	-1.05069	-91.1743	1	4	1.2
699	Villamil	Dec	2002	23.7	Day	Landing	Isabela Sur	Isabela	West	14.7	-1.05069	-91.1743	1	4	1.65
700	Villamil	Dec	2002	23.7	Day	Landing	Isabela Sur	Isabela	West	14.7	-1.05069	-91.1743	1	4	0.45
701	Villamil	Dec	2002	23.7	Night	Landing	Isabela Sur	Isabela	West	14.7	-1.05069	-91.1743	2	4	2.075
702	Villamil	Dec	2002	23.7	Night	Landing	Isabela Sur	Isabela	West	14.7	-1.05069	-91.1743	1	4	1.925
703	Villamil	Dec	2002	23.7	Day	Landing	Isabela Sur	Isabela	West	14.7	-1.05069	-91.1743	1	4	0.9
704	Villamil	Dec	2002	23.7	Day	Landing	Isabela Sur	Isabela	West	14.7	-1.05069	-91.1743	1	15	0.606667
705	Villamil	Dec	2002	23.7	Day	Landing	Isabela Sur	Isabela	West	14.7	-1.05069	-91.1743	1	10	0.27
706	Villamil	Dec	2002	23.7	Day	Landing	Isabela Sur	Isabela	West	14.7	-1.05069	-91.1743	1	20	0.955
707	Villamil	Dec	2002	23.7	Day	Landing	Isabela Sur	Isabela	West	0.52	-0.96708	-90.9665	1	4	0.075
708	Villamil	Dec	2002	23.7	Day	Landing	Isabela Sur	Isabela	West	0.52	-0.96708	-90.9665	1	5	0.14
709	Villamil	Dec	2002	23.7	Day	Landing	Isabela Sur	Isabela	West	0.52	-0.96708	-90.9665	1	4	1.125
710	Villamil	Dec	2002	23.7	Day	Landing	Isabela Sur	Isabela	West	0.52	-0.96708	-90.9665	1	4	0.15
711	Villamil	Dec	2002	23.7	Day	Landing	Isabela Sur	Isabela	West	0.52	-0.96708	-90.9665	1	4	1.35
712	Villamil	Dec	2002	23.7	Night	Landing	Isabela Sur	Isabela	West	1.93	-0.97723	-90.988	2	4	0.4
713	Villamil	Dec	2002	23.7	Day	Landing	Isabela Sur	Isabela	West	1.93	-0.97723	-90.988	2	4	0.0875
714	Villamil	Dec	2002	23.7	Day	Landing	Isabela Sur	Isabela	West	1.93	-0.97723	-90.988	1	3	0.0666667
715	Villamil	Dec	2002	23.7	Day	Landing	Isabela Sur	Isabela	West	1.93	-0.97723	-90.988	1	3	1.5
716	Villamil	Dec	2002	23.7	Day	Landing	Isabela Sur	Isabela	West	1.93	-0.97723	-90.988	1	3	0.3
717	Villamil	Dec	2002	23.7	Day	Landing	Isabela Sur	Isabela	West	1.93	-0.97723	-90.988	1	4	0.225
718	Villamil	Dec	2002	23.7	Day	Landing	Isabela Sur	Isabela	West	12.2	-1.0394	-91.1467	1	15	0.486667
719	Villamil	Dec	2002	23.7	Day	Landing	Isabela Sur	Isabela	West	12.2	-1.0394	-91.1467	2	12	0.5875
720	Villamil	Dec	2002	23.7	Day	Landing	Isabela Sur	Isabela	West	12.2	-1.0394	-91.1467	1	10	0.5
721	Villamil	Dec	2002	23.7	Day	Landing	Isabela Sur	Isabela	West	12.2	-1.0394	-91.1467	1	10	0.23
722	Villamil	Dec	2002	23.7	Day	Landing	Isabela Sur	Isabela	West	12.2	-1.0394	-91.1467	1	20	0.625
723	Villamil	Dec	2002	23.7	Day	Landing	Isabela Sur	Isabela	West	12.2	-1.0394	-91.1467	1	15	0.333333
724	Villamil	Dec	2002	23.7	Day	Observer	Isabela Sur	Isabela	West	12.2	-1.0394	-91.1467	1	3	0.766667
725	Villamil	Dec	2002	23.7	Day	Landing	Isabela Sur	Isabela	West	12.2	-1.0394	-91.1467	1	8	1.7
726	Villamil	Dec	2002	23.7	Day	Landing	Isabela Sur	Isabela	West	22.7	-0.72072	-90.8072	1	4	0.45
727	Villamil	Dec	2002	23.7	Day	Landing	Isabela Sur	Isabela	West	34.2	-0.95519	-91.461	2	16	0.00625
728	Villamil	Dec	2002	23.7	Day	Landing	Isabela Sur	Isabela	West	34.2	-0.95519	-91.461	2	20	0.285
729	Villamil	Dec	2002	23.7	Day	Landing	Isabela Sur	Isabela	West	34.2	-0.95519	-91.461	1	18	1.86667
730	Villamil	Dec	2002	23.7	Day	Landing	Isabela Sur	Isabela	West	34.2	-0.95519	-91.461	1	20	1.24
731	Villamil	Dec	2002	23.7	Day	Landing	Isabela Sur	Isabela	West	34.2	-0.95519	-91.461	1	6	1.51667
732	Villamil	Dec	2002	23.7	Day	Landing	Isabela Sur	Isabela	West	6.42	-0.9896	-90.8706	1	3	0.3
733	Villamil	Dec	2002	23.7	Day	Landing	Isabela Sur	Isabela	West	9.18	-1.02	-91.1	1	4	0.75
734	Villamil	Dec	2002	23.7	Day	Landing	Isabela Sur	Isabela	West	9.18	-1.02	-91.1	1	4	0.5
735	Villamil	Dec	2002	23.7	Day	Landing	Isabela Sur	Isabela	West	9.18	-1.02	-91.1	1	4	0.35
736	Villamil	Dec	2002	23.7	Day	Landing	Isabela Sur	Isabela	West	9.18	-1.02	-91.1	1	4	0.175
737	Villamil	Dec	2002	23.7	Day	Landing	Isabela Sur	Isabela	West	9.18	-1.02	-91.1	1	4	1.475
738	Villamil	Dec	2002	23.7	Day	Landing	Isabela Sur	Isabela	West	9.18	-1.02	-91.1	1	4	0.275
739	Villamil	Dec	2002	23.7	Day	Landing	Isabela Sur	Isabela	West	9.18	-1.02	-91.1	1	4	0.175
740	Villamil	Dec	2002	23.7	Day	Landing	Isabela Sur	Isabela	West	9.18	-1.02	-91.1	1	4	0.95
741	Villamil	Dec	2002	23.7	Day	Landing	Isabela Sur	Isabela	West	1.21	-0.978203	-90.9576	1	4	0.575
742	Villamil	Dec	2002	23.7	Day	Landing	Isabela Sur	Isabela	West	1.21	-0.978203	-90.9576	1	5	0.1
743	Villamil	Dec	2002	23.7	Day	Landing	Isabela Sur	Isabela	West	1.21	-0.978203	-90.9576	1	4	0.175
744	Villamil	Dec	2002	23.7	Day	Landing	Isabela Sur	Isabela	West	1.21	-0.978203	-90.9576	1	3	0.766667
745	Villamil	Dec	2002	23.7	Day	Landing	Isabela Sur	Isabela	West	1.21	-0.978203	-90.9576	1	4	1.075
746	Villamil	Dec	2002	23.7	Day	Landing	Isabela Sur	Isabela	West	1.21	-0.978203	-90.9576	1	3	0.133333
747	Villamil	Dec	2002	23.7	Day	Landing	Isabela Sur	Isabela	West	1.21	-0.978203	-90.9576	1	2	0.9
748	Villamil	Dec	2002	23.7	Day	Landing	Isabela Sur	Isabela	West	1.21	-0.978203	-90.9576	1	5	0.46
749	Villamil	Dec	2002	23.7	Day	Landing	Isabela Sur	Isabela	West	1.21	-0.978203	-90.9576	1	4	0.05
750	Villamil	Dec	2002	23.7	Day	Landing	Isabela Sur	Isabela	West	2.1	-0.9711	-90.9343	1	4	0.75
751	Villamil	Dec	2002	23.7	Night	Landing	Isabela Sur	Isabela	West	2.1	-0.9711	-90.9343	1	4	1.925
752	Villamil	Dec	2002	23.7	Day	Landing	Isabela Sur	Isabela	West	2.1	-0.9711	-90.9343	1	4	0.75
753	Villamil	Dec	2002	23.7	Day	Landing	Isabela Sur	Isabela	West	2.1	-0.9711	-90.9343	1	4	0.35
754	Villamil	Dec	2002	23.7	Day	Landing	Isabela Sur	Isabela	West	2.1	-0.9711	-90.9343	1	4	1.375
755	Villamil	Dec	2002	23.7	Day	Landing	Isabela Sur	Isabela	West	14.9	-1.04912	-91.1846	1	15	0.486667
756	Villamil	Dec	2002	23.7	Day	Landing	Isabela Sur	Isabela	West	14.9	-1.04912	-91.1846	2	10	0.545
757	Villamil	Dec	2002	23.7	Day	Landing	Isabela Sur	Isabela	West	14.9	-1.04912	-91.1846	1	10	0.11
758	Villamil	Dec	2002	23.7	Day	Landing	Isabela Sur	Isabela	West	14.9	-1.04912	-91.1846	1	4	0.575
759	Villamil	Dec	2002	23.7	Day	Landing	Isabela Sur	Isabela	West	6.56	-1.01864	-91.0558	1	4	0.4
760	Villamil	Dec	2002	23.7	Day	Landing	Isabela Sur	Isabela	West	6.56	-1.01864	-91.0558	1	4	0.35
761	Villamil	Dec	2002	23.7	Day	Landing	Isabela Sur	Isabela	West	6.56	-1.01864	-91.0558	1	4	0.05
762	Villamil	Dec	2002	23.7	Day	Landing	Isabela Sur	Isabela	West	6.56	-1.01864	-91.0558	1	3	0.0766667
763	Villamil	Dec	2002	23.7	Day	Landing	Isabela Sur	Isabela	West	6.56	-1.01864	-91.0558	1	4	0.125
764	Villamil	Dec	2002	23.7	Day	Landing	Isabela Sur	Isabela	West	6.56	-1.01864	-91.0558	1	4	0.125
765	Villamil	Dec	2002	23.7	Day	Landing	Isabela Sur	Isabela	West	6.56	-1.01864	-91.0558	1	4	0.125
766	Villamil	Dec	2002	23.7	Day	Landing	Isabela Sur	Isabela	West	6.56	-1.01864	-91.0558	1	4	0.225
767	Villamil	Dec	2002	23.7	Day	Landing	Isabela Sur	Isabela	West	6.56	-1.01864	-91.0558	1	4	0.125
768	Villamil	Dec	2002	23.7	Day	Landing	Isabela Sur	Isabela	West	6.56	-1.01864	-91.0558	1	4	0.05
769	Villamil	Dec	2002	23.7	Day	Landing	Isabela Sur	Isabela	West	6.56	-1.01864	-91.0558	1	4	0.225
770	Villamil	Dec	2002	23.7	Day	Landing	Isabela Sur	Isabela	West	6.56	-1.01864	-91.0558	1	4	0.9
771	Villamil	Dec	2002	23.7	Day	Landing	Isabela Sur	Isabela	West	6.56	-1.01864	-91.0558	1	4	0.125
772	Villamil	Dec	2002	23.7	Day	Landing	Isabela Sur	Isabela	West	6.56	-1.01864	-91.0558	1	4	0.05
773	Villamil	Dec	2002	23.7	Day	Landing	Isabela Sur	Isabela	West	6.56	-1.01864	-91.0558	1	4	0.05
774	Villamil	Dec	2002	23.7	Day	Landing	Isabela Sur	Isabela	West	6.56	-1.01864	-91.0558	1	4	0.05
775	Villamil	Dec	2002	23.7	Day	Landing	Isabela Sur	Isabela	West	6.56	-1.01864	-91.0558	1	4	0.225
776	Villamil	Dec	2002	23.7	Day	Landing	Isabela Sur	Isabela	West	6.56	-1.01864	-91.0558	1	5	0.28
777	Villamil	Dec	2002	23.7	Day	Landing	Isabela Sur	Isabela	West	6.56	-1.01864	-91.0558	1	4	0.125
778	Villamil	Dec	2002	23.7	Day	Landing	Isabela Sur	Isabela	West	6.56	-1.01864	-91.0558	1	4	1.575
779	Villamil	Dec	2002	23.7	Day	Landing	Isabela Sur	Isabela	West	6.56	-1.01864	-91.0558	1	4	0.35
780	Villamil	Dec	2002	23.7	Day	Landing	Isabela Sur	Isabela	West	6.56	-1.01864	-91.0558	1	4	0.175
781	Villamil	Dec	2002	23.7	Day	Landing	Isabela Sur	Isabela	West	6.56	-1.01864	-91.0558	1	2	0.25
782	Villamil	Dec	2002	23.7	Day	Landing	Isabela Sur	Isabela	West	6.56	-1.01864	-91.0558	1	3	0.0666667
783	Villamil	Dec	2002	23.7	Day	Landing	Isabela Sur	Isabela	West	6.56	-1.01864	-91.0558	1	4	0.05
784	Villamil	Dec	2002	23.7	Day	Landing	Isabela Sur	Isabela	West	18	-1.0358	-91.2282	2	20	0.205
785	Villamil	Dec	2002	23.7	Day	Landing	Isabela Sur	Isabela	West	18	-1.0358	-91.2282	2	8	1.39375
786	Villamil	Dec	2002	23.7	Day	Landing	Isabela Sur	Isabela	West	18	-1.0358	-91.2282	1	6	1.1
787	Villamil	Dec	2002	23.7	Day	Landing	Isabela Sur	Isabela	West	18	-1.0358	-91.2282	1	3	0.6
788	Villamil	Dec	2002	23.7	Day	Landing	Isabela Sur	Isabela	West	18	-1.0358	-91.2282	1	4	1.35
789	Ayora	Sep	2002	23.5	Day	Observer	Pinta	Pinta	North	106	0.57703	-90.785	1	4	0.55
790	Ayora	Sep	2002	23.5	Night	Landing	Pinta	Pinta	North	106	0.5811	-90.7864	1	3	1.33333
791	Ayora	Sep	2002	23.5	Night	Observer	Pinta	Pinta	North	106	0.5811	-90.7864	2	3	1.16667
792	Ayora	Sep	2002	23.5	Day	Observer	Pinta	Pinta	North	106	0.57703	-90.785	2	4	0.125
793	Ayora	Sep	2002	23.5	Night	Observer	Pinta	Pinta	North	106	0.5811	-90.7864	2	3	1.5
794	Ayora	Sep	2002	23.5	Day	Observer	Pinta	Pinta	North	106	0.57703	-90.785	2	4	0.25
795	Ayora	Sep	2002	23.5	Night	Observer	Pinta	Pinta	North	106	0.5811	-90.7864	2	3	0.0833333
796	Ayora	Sep	2002	23.5	Day	Observer	Pinta	Pinta	North	106	0.57703	-90.785	2	4	0.825
797	Ayora	Sep	2002	23.5	Night	Landing	Pinta	Pinta	North	92.8	0.4761	-90.6455	1	2	1.8
798	Ayora	Sep	2002	23.5	Night	Landing	Pinta	Pinta	North	92.8	0.4761	-90.6455	2	3	2.95
799	Ayora	Sep	2002	23.5	Night	Landing	Pinta	Pinta	North	92.8	0.4761	-90.6455	2	2	0.675
800	Ayora	Sep	2002	23.5	Night	Landing	Pinta	Pinta	North	92.8	0.4761	-90.6455	2	2	1.825
801	Ayora	Sep	2002	23.5	Day	Landing	Pinta	Pinta	North	92.8	0.4761	-90.6455	7	8	5.57143
802	Baquerizo	Sep	2002	23.5	Night	Observer	Pinta	Pinta	North	133	0.62525	-90.7539	1	6	2.41833
803	Baquerizo	Sep	2002	23.5	Night	Observer	Pinta	Pinta	North	136	0.69908	-90.7778	1	6	2.26667
804	Baquerizo	Sep	2002	23.5	Night	Observer	Pinta	Pinta	North	131	0.5811	-90.7864	1	7	1.16571
805	Baquerizo	Sep	2002	23.5	Night	Observer	Pinta	Pinta	North	133	0.62525	-90.7539	1	4	3.9675
806	Baquerizo	Sep	2002	23.5	Night	Observer	Pinta	Pinta	North	131	0.5811	-90.7864	2	6	1.47333
807	Baquerizo	Sep	2002	23.5	Night	Observer	Pinta	Pinta	North	136	0.6471	-90.774	2	4	0.85
808	Baquerizo	Sep	2002	23.5	Night	Observer	Pinta	Pinta	North	131	0.5811	-90.7864	1	5	1.814
809	Baquerizo	Sep	2002	23.5	Night	Observer	Pinta	Pinta	North	133	0.62525	-90.7539	1	6	1.74
810	Baquerizo	Sep	2002	23.5	Night	Observer	Pinta	Pinta	North	136	0.64383	-90.7775	1	5	3.264
811	Baquerizo	Sep	2002	23.5	Night	Observer	Pinta	Pinta	North	136	0.6471	-90.774	2	3	0.906667
812	Baquerizo	Sep	2002	23.5	Night	Observer	Pinta	Pinta	North	133	0.62525	-90.7539	2	4	0.2825
813	Baquerizo	Sep	2002	23.5	Night	Observer	Pinta	Pinta	North	131	0.61232	-90.7886	2	7	1.87857
814	Baquerizo	Sep	2002	23.5	Night	Observer	Pinta	Pinta	North	131	0.56342	-90.7833	2	6	1.7
815	Baquerizo	Sep	2002	23.5	Night	Observer	Pinta	Pinta	North	136	0.6471	-90.774	2	7	1.58714
816	Baquerizo	Sep	2002	23.5	Night	Observer	Pinta	Pinta	North	133	0.62525	-90.7539	8	26	0.270337
817	Baquerizo	Sep	2002	23.5	Night	Observer	Pinta	Pinta	North	136	0.6471	-90.774	8	25	0.263
818	Baquerizo	Sep	2002	23.5	Night	Observer	Pinta	Pinta	North	131	0.5811	-90.7864	8	35	0.205679
819	Ayora	Sep	2002	22.2	Night	Landing	San Cristobal N y O	San Cristobal	Centre- South	102	0.06442	-91.5048	7	4	2
820	Baquerizo	Sep	2002	22.2	Night	Landing	San Cristobal N y O	San Cristobal	Centre- South	22	-0.683	-89.3279	2	8	2.26875
821	Baquerizo	Sep	2002	22.2	Night	Landing	San Cristobal N y O	San Cristobal	Centre- South	22	-0.683	-89.3279	2	8	1.41875
822	Baquerizo	Sep	2002	22.2	Night	Landing	San Cristobal N y O	San Cristobal	Centre- South	19.8	-0.7042	-89.3752	1	8	0.58625
823	Baquerizo	Sep	2002	22.2	Night	Landing	San Cristobal N y O	San Cristobal	Centre- South	7.46	-0.8139	-89.5417	1	4	0.2825
824	Baquerizo	Sep	2002	22.2	Day	Landing	San Cristobal N y O	San Cristobal	Centre- South	12.8	-0.77633	-89.4757	1	5	0.362
825	Baquerizo	Sep	2002	22.2	Night	Landing	San Cristobal N y O	San Cristobal	Centre- South	7.46	-0.8139	-89.5417	2	8	0.7125
826	Baquerizo	Sep	2002	22.2	Night	Landing	San Cristobal N y O	San Cristobal	Centre- South	22	-0.683	-89.3279	1	6	1.00722
827	Baquerizo	Sep	2002	22.2	Day	Landing	San Cristobal N y O	San Cristobal	Centre- South	12.8	-0.77633	-89.4757	1	7	0.709524
828	Baquerizo	Sep	2002	22.2	Night	Landing	San Cristobal N y O	San Cristobal	Centre- South	12.8	-0.77633	-89.4757	1	5	1.36
829	Baquerizo	Sep	2002	22.2	Night	Landing	San Cristobal N y O	San Cristobal	Centre- South	7.46	-0.8139	-89.5417	2	5	0.85
830	Baquerizo	Sep	2002	22.2	Night	Observer	San Cristobal N y O	San Cristobal	Centre- South	12.8	-0.74931	-89.4511	1	5	0.26
831	Baquerizo	Sep	2002	20.9	Night	Landing	San Cristobal S y E	San Cristobal	Centre- South	17.4	-0.9254	-89.4113	1	5	0.544
832	Baquerizo	Sep	2002	20.9	Night	Landing	San Cristobal S y E	San Cristobal	Centre- South	6.1	-0.9409	-89.5906	1	5	1.268
833	Baquerizo	Sep	2002	20.9	Night	Landing	San Cristobal S y E	San Cristobal	Centre- South	26	-0.71267	-89.2403	1	5	0.724
834	Baquerizo	Sep	2002	20.9	Night	Landing	San Cristobal S y E	San Cristobal	Centre- South	9.5	-0.9557	-89.5197	2	7	0.595238
835	Baquerizo	Sep	2002	20.9	Night	Landing	San Cristobal S y E	San Cristobal	Centre- South	5.41	-0.94788	-89.587	1	4	3.725
836	Baquerizo	Sep	2002	20.9	Night	Landing	San Cristobal S y E	San Cristobal	Centre- South	11.2	-0.9497	-89.4963	1	6	1.73833
837	Baquerizo	Sep	2002	20.9	Night	Landing	San Cristobal S y E	San Cristobal	Centre- South	26.2	-0.8626	-89.367	1	6	1.61667
838	Baquerizo	Sep	2002	20.9	Night	Landing	San Cristobal S y E	San Cristobal	Centre- South	6.1	-0.9409	-89.5906	2	5	0.513333
839	Baquerizo	Sep	2002	20.9	Night	Landing	San Cristobal S y E	San Cristobal	Centre- South	11.2	-0.9497	-89.4963	2	5	2.045
840	Baquerizo	Sep	2002	20.9	Day	Observer	San Cristobal S y E	San Cristobal	Centre- South	27.8	-0.842495	-89.3527	2	6	0.418333
841	Baquerizo	Sep	2002	20.9	Day	Landing	San Cristobal S y E	San Cristobal	Centre- South	36.9	-0.7556	-89.2644	1	6	2.25
842	Baquerizo	Sep	2002	20.9	Night	Landing	San Cristobal S y E	San Cristobal	Centre- South	27.8	-0.842495	-89.3527	1	5	0.462
843	Baquerizo	Sep	2002	20.9	Night	Landing	San Cristobal S y E	San Cristobal	Centre- South	11.2	-0.9497	-89.4963	1	5	2.842
844	Baquerizo	Sep	2002	20.9	Night	Landing	San Cristobal S y E	San Cristobal	Centre- South	9.5	-0.9557	-89.5197	1	6	2.01556
845	Baquerizo	Sep	2002	20.9	Night	Landing	San Cristobal S y E	San Cristobal	Centre- South	11.2	-0.9497	-89.4963	1	6	0.376667
846	Baquerizo	Sep	2002	20.9	Day	Observer	San Cristobal S y E	San Cristobal	Centre- South	11.2	-0.93867	-89.4712	1	5	2.36
847	Baquerizo	Sep	2002	20.9	Night	Landing	San Cristobal S y E	San Cristobal	Centre- South	15.5	-0.93575	-89.4399	1	6	3.02333
848	Baquerizo	Sep	2002	20.9	Night	Landing	San Cristobal S y E	San Cristobal	Centre- South	17.4	-0.9254	-89.4113	2	8	0.51
849	Baquerizo	Sep	2002	20.9	Night	Landing	San Cristobal S y E	San Cristobal	Centre- South	9.5	-0.9557	-89.5197	2	7	0.388571
850	Baquerizo	Sep	2002	20.9	Night	Landing	San Cristobal S y E	San Cristobal	Centre- South	26	-0.71267	-89.2403	1	6	3.02333
851	Baquerizo	Sep	2002	20.9	Night	Landing	San Cristobal S y E	San Cristobal	Centre- South	11.2	-0.9497	-89.4963	1	5	1.224
852	Baquerizo	Sep	2002	20.9	Night	Landing	San Cristobal S y E	San Cristobal	Centre- South	9.5	-0.9557	-89.5197	2	4	2.125
853	Baquerizo	Sep	2002	20.9	Night	Landing	San Cristobal S y E	San Cristobal	Centre- South	6.1	-0.9409	-89.5906	1	5	2.992
854	Baquerizo	Sep	2002	20.9	Night	Landing	San Cristobal S y E	San Cristobal	Centre- South	5.41	-0.94788	-89.587	1	6	2.04
855	Baquerizo	Sep	2002	20.9	Night	Landing	San Cristobal S y E	San Cristobal	Centre- South	9.5	-0.9557	-89.5197	1	5	0.816
856	Baquerizo	Sep	2002	20.9	Night	Landing	San Cristobal S y E	San Cristobal	Centre- South	5.41	-0.94788	-89.587	1	4	1.06
857	Baquerizo	Sep	2002	20.9	Night	Landing	San Cristobal S y E	San Cristobal	Centre- South	17.4	-0.9254	-89.4113	2	5	0.59
858	Baquerizo	Sep	2002	20.9	Night	Landing	San Cristobal S y E	San Cristobal	Centre- South	11.2	-0.9497	-89.4963	1	8	1.13625
859	Baquerizo	Sep	2002	20.9	Night	Landing	San Cristobal S y E	San Cristobal	Centre- South	11.2	-0.9497	-89.4963	2	6	0.308056
860	Baquerizo	Sep	2002	20.9	Night	Landing	San Cristobal S y E	San Cristobal	Centre- South	8.25	-0.95585	-89.5428	2	4	0.73
861	Baquerizo	Sep	2002	20.9	Night	Landing	San Cristobal S y E	San Cristobal	Centre- South	11.2	-0.9497	-89.4963	1	6	2.645
862	Baquerizo	Sep	2002	20.9	Day	Landing	San Cristobal S y E	San Cristobal	Centre- South	11.2	-0.9497	-89.4963	1	4	0.34
863	Baquerizo	Sep	2002	20.9	Night	Landing	San Cristobal S y E	San Cristobal	Centre- South	11.2	-0.9497	-89.4963	2	6	0.869167
864	Baquerizo	Sep	2002	20.9	Night	Landing	San Cristobal S y E	San Cristobal	Centre- South	11.2	-0.9497	-89.4963	1	9	0.844444
865	Baquerizo	Sep	2002	20.9	Night	Landing	San Cristobal S y E	San Cristobal	Centre- South	8.25	-0.95585	-89.5428	1	6	1.53667
866	Baquerizo	Sep	2002	20.9	Night	Landing	San Cristobal S y E	San Cristobal	Centre- South	9.5	-0.9557	-89.5197	1	4	0.755833
867	Baquerizo	Sep	2002	20.9	Night	Landing	San Cristobal S y E	San Cristobal	Centre- South	11.2	-0.9497	-89.4963	1	6	1.41056
868	Baquerizo	Sep	2002	20.9	Night	Landing	San Cristobal S y E	San Cristobal	Centre- South	11.2	-0.9497	-89.4963	2	6	0.516389
869	Baquerizo	Sep	2002	20.9	Night	Landing	San Cristobal S y E	San Cristobal	Centre- South	15.5	-0.93575	-89.4399	2	6	1.3225
870	Baquerizo	Sep	2002	20.9	Night	Landing	San Cristobal S y E	San Cristobal	Centre- South	17.4	-0.9254	-89.4113	2	6	0.833333
871	Baquerizo	Sep	2002	20.9	Night	Landing	San Cristobal S y E	San Cristobal	Centre- South	17.4	-0.9254	-89.4113	2	8	1.16187
872	Baquerizo	Sep	2002	20.9	Night	Landing	San Cristobal S y E	San Cristobal	Centre- South	26	-0.71267	-89.2403	2	6	0.591944
873	Baquerizo	Sep	2002	20.9	Day	Landing	San Cristobal S y E	San Cristobal	Centre- South	27.8	-0.842495	-89.3527	2	6	0.627778
874	Baquerizo	Sep	2002	20.9	Night	Landing	San Cristobal S y E	San Cristobal	Centre- South	11.2	-0.9497	-89.4963	1	4	1.88917
875	Baquerizo	Sep	2002	20.9	Night	Landing	San Cristobal S y E	San Cristobal	Centre- South	11.2	-0.9497	-89.4963	2	4	2.75
876	Baquerizo	Sep	2002	20.9	Night	Landing	San Cristobal S y E	San Cristobal	Centre- South	17.4	-0.9254	-89.4113	1	8	1.30375
877	Baquerizo	Sep	2002	20.9	Day	Landing	San Cristobal S y E	San Cristobal	Centre- South	27.8	-0.842495	-89.3527	1	5	0.98
878	Baquerizo	Sep	2002	20.9	Night	Landing	San Cristobal S y E	San Cristobal	Centre- South	11.2	-0.9497	-89.4963	1	8	4.535
879	Baquerizo	Sep	2002	20.9	Night	Landing	San Cristobal S y E	San Cristobal	Centre- South	11.2	-0.9497	-89.4963	1	6	2.25
880	Baquerizo	Sep	2002	20.9	Night	Landing	San Cristobal S y E	San Cristobal	Centre- South	27.8	-0.842495	-89.3527	2	8	0.227083
881	Baquerizo	Sep	2002	20.9	Day	Landing	San Cristobal S y E	San Cristobal	Centre- South	27.8	-0.842495	-89.3527	2	4	0.52875
882	Baquerizo	Sep	2002	20.9	Night	Landing	San Cristobal S y E	San Cristobal	Centre- South	17.4	-0.9254	-89.4113	2	3	0.301667
883	Baquerizo	Sep	2002	20.9	Day	Landing	San Cristobal S y E	San Cristobal	Centre- South	11.2	-0.9497	-89.4963	1	6	1.36
884	Baquerizo	Sep	2002	20.9	Night	Landing	San Cristobal S y E	San Cristobal	Centre- South	27.8	-0.842495	-89.3527	2	8	0.5325
885	Baquerizo	Sep	2002	20.9	Day	Landing	San Cristobal S y E	San Cristobal	Centre- South	27.8	-0.842495	-89.3527	2	5	0.77
886	Baquerizo	Sep	2002	20.9	Day	Landing	San Cristobal S y E	San Cristobal	Centre- South	11.2	-0.9497	-89.4963	2	4	1.075
887	Baquerizo	Sep	2002	20.9	Day	Landing	San Cristobal S y E	San Cristobal	Centre- South	11.2	-0.9497	-89.4963	1	6	1.36333
888	Baquerizo	Sep	2002	20.9	Night	Landing	San Cristobal S y E	San Cristobal	Centre- South	5.41	-0.94788	-89.587	2	6	1.775
889	Baquerizo	Sep	2002	20.9	Night	Landing	San Cristobal S y E	San Cristobal	Centre- South	26	-0.71267	-89.2403	1	4	1.375
890	Baquerizo	Sep	2002	20.9	Night	Landing	San Cristobal S y E	San Cristobal	Centre- South	27.8	-0.842495	-89.3527	2	6	0.755833
891	Baquerizo	Sep	2002	20.9	Day	Landing	San Cristobal S y E	San Cristobal	Centre- South	27.8	-0.842495	-89.3527	2	6	0.8875
892	Baquerizo	Sep	2002	20.9	Night	Landing	San Cristobal S y E	San Cristobal	Centre- South	26.2	-0.8626	-89.367	2	6	0.17
893	Baquerizo	Sep	2002	20.9	Night	Landing	San Cristobal S y E	San Cristobal	Centre- South	27.8	-0.842495	-89.3527	5	10	0.444
894	Baquerizo	Sep	2002	20.9	Night	Landing	San Cristobal S y E	San Cristobal	Centre- South	26	-0.71267	-89.2403	5	10	0.316
895	Ayora	Sep	2002	21.4	Day	Landing	Santa Cruz	Santa Cruz	Centre- South	7.42	-0.71	-90.2128	1	4	0.5
896	Ayora	Sep	2002	21.4	Night	Observer	Santa Cruz	Santa Cruz	Centre- South	10	-0.68476	-90.1952	1	6	0.0666667
897	Ayora	Sep	2002	21.4	Day	Landing	Santa Cruz	Santa Cruz	Centre- South	14	-0.73309	-90.4665	1	3	0.766667
898	Ayora	Sep	2002	21.4	Day	Observer	Santa Cruz	Santa Cruz	Centre- South	26.5	-0.58467	-90.532	1	8	0.604167
899	Ayora	Sep	2002	21.4	Night	Observer	Santa Cruz	Santa Cruz	Centre- South	21.2	-0.65407	-90.5439	1	3	0.644444
900	Ayora	Sep	2002	21.4	Day	Observer	Santa Cruz	Santa Cruz	Centre- South	21.2	-0.65407	-90.5438	1	6	0.922222
901	Ayora	Sep	2002	21.4	Day	Landing	Santa Cruz	Santa Cruz	Centre- South	9.51	-0.75504	-90.4214	2	1	2
902	Ayora	Sep	2002	21.4	Night	Landing	Santa Cruz	Santa Cruz	Centre- South	23.6	-0.6042	-90.5411	1	10.5	2.30476
903	Ayora	Sep	2002	21.4	Night	Landing	Santa Cruz	Santa Cruz	Centre- South	9.51	-0.75504	-90.4214	1	4	1.7
904	Ayora	Sep	2002	21.4	Night	Landing	Santa Cruz	Santa Cruz	Centre- South	9.51	-0.75504	-90.4214	2	18	0.516667
905	Ayora	Sep	2002	21.4	Day	Landing	Santa Cruz	Santa Cruz	Centre- South	14	-0.73309	-90.4665	1	3	0.3
906	Ayora	Sep	2002	21.4	Day	Landing	Santa Cruz	Santa Cruz	Centre- South	7.42	-0.71	-90.2128	1	4	1.5
907	Ayora	Sep	2002	21.4	Night	Landing	Santa Cruz	Santa Cruz	Centre- South	14.6	-0.7236	-90.4896	1	5	3.6
908	Ayora	Sep	2002	21.4	Night	Landing	Santa Cruz	Santa Cruz	Centre- South	23.6	-0.6042	-90.5411	1	5	2.36
909	Ayora	Sep	2002	21.4	Day	Landing	Santa Cruz	Santa Cruz	Centre- South	7.42	-0.71	-90.2128	1	4	1.125
910	Ayora	Sep	2002	21.4	Day	Landing	Santa Cruz	Santa Cruz	Centre- South	11.3	-0.7485	-90.4464	2	4	0.175
911	Ayora	Sep	2002	21.4	Day	Landing	Santa Cruz	Santa Cruz	Centre- South	11.3	-0.7485	-90.4464	2	4	0.175
912	Ayora	Sep	2002	21.4	Night	Landing	Santa Cruz	Santa Cruz	Centre- South	11.3	-0.7485	-90.4464	1	5	1.72
913	Ayora	Sep	2002	21.4	Day	Landing	Santa Cruz	Santa Cruz	Centre- South	11.3	-0.7485	-90.4464	2	3	0.0388889
914	Ayora	Sep	2002	21.4	Night	Landing	Santa Cruz	Santa Cruz	Centre- South	9.51	-0.75504	-90.4214	1	4	2.75
915	Ayora	Sep	2002	21.4	Night	Landing	Santa Cruz	Santa Cruz	Centre- South	7.42	-0.71	-90.2128	1	2	0.9
916	Ayora	Sep	2002	21.4	Day	Landing	Santa Cruz	Santa Cruz	Centre- South	9.51	-0.75504	-90.4214	1	4	0.575
917	Ayora	Sep	2002	21.4	Day	Landing	Santa Cruz	Santa Cruz	Centre- South	21.2	-0.654	-90.5493	1	2	3.6
918	Ayora	Sep	2002	21.4	Day	Landing	Santa Cruz	Santa Cruz	Centre- South	14	-0.73309	-90.4665	1	5	0.72
919	Ayora	Sep	2002	21.4	Day	Landing	Santa Cruz	Santa Cruz	Centre- South	11.3	-0.7485	-90.4464	2	4	0.2
920	Ayora	Sep	2002	21.4	Night	Landing	Santa Cruz	Santa Cruz	Centre- South	21.2	-0.654	-90.5493	1	3	3
921	Ayora	Sep	2002	21.4	Day	Landing	Santa Cruz	Santa Cruz	Centre- South	5.62	-0.7354	-90.2324	1	5	0.46
922	Ayora	Sep	2002	21.4	Night	Landing	Santa Cruz	Santa Cruz	Centre- South	14.6	-0.7236	-90.4896	1	3	1.2
923	Ayora	Sep	2002	21.4	Day	Landing	Santa Cruz	Santa Cruz	Centre- South	11.3	-0.7485	-90.4464	1	4	0.45
924	Ayora	Sep	2002	21.4	Night	Landing	Santa Cruz	Santa Cruz	Centre- South	14	-0.73309	-90.4665	2	3	0.75
925	Ayora	Sep	2002	21.4	Night	Landing	Santa Cruz	Santa Cruz	Centre- South	14	-0.73309	-90.4665	1	2	3
926	Ayora	Sep	2002	21.4	Night	Landing	Santa Cruz	Santa Cruz	Centre- South	14.6	-0.7236	-90.4896	1	8	2.5625
927	Ayora	Sep	2002	21.4	Night	Landing	Santa Cruz	Santa Cruz	Centre- South	13	-0.74564	-90.4489	2	6.5	0.638462
928	Ayora	Sep	2002	21.4	Day	Landing	Santa Cruz	Santa Cruz	Centre- South	9.51	-0.75504	-90.4214	1	3	1.83333
929	Ayora	Sep	2002	21.4	Night	Landing	Santa Cruz	Santa Cruz	Centre- South	21.2	-0.654	-90.5493	1	47	0.223404
930	Ayora	Sep	2002	21.4	Day	Landing	Santa Cruz	Santa Cruz	Centre- South	21.2	-0.654	-90.5493	2	5	1
931	Ayora	Sep	2002	21.4	Night	Landing	Santa Cruz	Santa Cruz	Centre- South	14	-0.73309	-90.4665	2	6	0.3
932	Ayora	Sep	2002	21.4	Night	Landing	Santa Cruz	Santa Cruz	Centre- South	11.3	-0.7485	-90.4464	1	2	1.25
933	Ayora	Sep	2002	21.4	Night	Landing	Santa Cruz	Santa Cruz	Centre- South	9.51	-0.75504	-90.4214	1	2	0.9
934	Ayora	Sep	2002	21.4	Night	Landing	Santa Cruz	Santa Cruz	Centre- South	21.2	-0.654	-90.5493	1	6	1.28333
935	Ayora	Sep	2002	21.4	Day	Landing	Santa Cruz	Santa Cruz	Centre- South	9.51	-0.75504	-90.4214	1	4	0.45
936	Ayora	Sep	2002	21.4	Day	Landing	Santa Cruz	Santa Cruz	Centre- South	14.6	-0.7236	-90.4896	1	3	0.1
937	Ayora	Sep	2002	21.4	Night	Landing	Santa Cruz	Santa Cruz	Centre- South	21.2	-0.654	-90.5493	1	6	1.58333
938	Ayora	Sep	2002	21.4	Day	Landing	Santa Cruz	Santa Cruz	Centre- South	12.7	-0.6476	-90.1808	1	5	0.4
939	Ayora	Sep	2002	21.4	Day	Landing	Santa Cruz	Santa Cruz	Centre- South	5.62	-0.7354	-90.2324	1	4	0.175
940	Ayora	Sep	2002	21.4	Night	Landing	Santa Cruz	Santa Cruz	Centre- South	21.2	-0.654	-90.5493	1	5	2.9
941	Ayora	Sep	2002	21.4	Day	Landing	Santa Cruz	Santa Cruz	Centre- South	14	-0.73309	-90.4665	1	3	1.73333
942	Ayora	Sep	2002	21.4	Day	Landing	Santa Cruz	Santa Cruz	Centre- South	11.3	-0.7485	-90.4464	2	5	0.06
943	Ayora	Sep	2002	21.4	Night	Landing	Santa Cruz	Santa Cruz	Centre- South	26.5	-0.57354	-90.5375	1	4	2.85
944	Ayora	Sep	2002	21.4	Night	Landing	Santa Cruz	Santa Cruz	Centre- South	7.42	-0.71	-90.2128	1	5	0.36
945	Ayora	Sep	2002	21.4	Day	Landing	Santa Cruz	Santa Cruz	Centre- South	13	-0.74564	-90.4489	1	5	0.46
946	Ayora	Sep	2002	21.4	Day	Landing	Santa Cruz	Santa Cruz	Centre- South	9.51	-0.75504	-90.4214	1	4	1.16667
947	Ayora	Sep	2002	21.4	Night	Landing	Santa Cruz	Santa Cruz	Centre- South	28.8	-0.5465	-90.5233	1	9	4.24444
948	Ayora	Sep	2002	21.4	Day	Landing	Santa Cruz	Santa Cruz	Centre- South	9.51	-0.75504	-90.4214	1	6	0.65
949	Ayora	Sep	2002	21.4	Night	Landing	Santa Cruz	Santa Cruz	Centre- South	11.3	-0.7485	-90.4464	1	3	1.5
950	Ayora	Sep	2002	21.4	Night	Landing	Santa Cruz	Santa Cruz	Centre- South	11.3	-0.7485	-90.4464	1	3	1.33333
951	Ayora	Sep	2002	21.4	Night	Landing	Santa Cruz	Santa Cruz	Centre- South	13	-0.74564	-90.4489	2	7	0.642857
952	Ayora	Sep	2002	21.4	Night	Landing	Santa Cruz	Santa Cruz	Centre- South	14	-0.73309	-90.4665	1	4	1.65
953	Ayora	Sep	2002	21.4	Night	Landing	Santa Cruz	Santa Cruz	Centre- South	14	-0.73309	-90.4665	1	4	2.025
954	Ayora	Sep	2002	21.4	Day	Landing	Santa Cruz	Santa Cruz	Centre- South	14	-0.73309	-90.4665	1	4	0.45
955	Ayora	Sep	2002	21.4	Night	Landing	Santa Cruz	Santa Cruz	Centre- South	14	-0.73309	-90.4665	1	4	1.7
956	Ayora	Sep	2002	21.4	Night	Landing	Santa Cruz	Santa Cruz	Centre- South	21.2	-0.654	-90.5493	1	3	1.5
957	Ayora	Sep	2002	21.4	Night	Landing	Santa Cruz	Santa Cruz	Centre- South	9.51	-0.75504	-90.4214	1	4	1.625
958	Ayora	Sep	2002	21.4	Day	Landing	Santa Cruz	Santa Cruz	Centre- South	7.42	-0.71	-90.2128	1	3	0.6
959	Ayora	Sep	2002	21.4	Day	Landing	Santa Cruz	Santa Cruz	Centre- South	14	-0.73309	-90.4665	2	6	0.2
960	Ayora	Sep	2002	21.4	Day	Landing	Santa Cruz	Santa Cruz	Centre- South	7.42	-0.71	-90.2128	1	3	0.433333
961	Ayora	Sep	2002	21.4	Day	Landing	Santa Cruz	Santa Cruz	Centre- South	7.42	-0.71	-90.2128	1	4	0.258333
962	Ayora	Sep	2002	21.4	Night	Landing	Santa Cruz	Santa Cruz	Centre- South	23.6	-0.6042	-90.5411	1	2	0.666667
963	Ayora	Sep	2002	21.4	Night	Landing	Santa Cruz	Santa Cruz	Centre- South	9.51	-0.75504	-90.4214	2	2	1.475
964	Ayora	Sep	2002	21.4	Night	Landing	Santa Cruz	Santa Cruz	Centre- South	14.6	-0.7236	-90.4896	1	4	0.9
965	Ayora	Sep	2002	21.4	Night	Landing	Santa Cruz	Santa Cruz	Centre- South	14	-0.73309	-90.4665	2	6	1.19167
966	Ayora	Sep	2002	21.4	Night	Landing	Santa Cruz	Santa Cruz	Centre- South	13	-0.74564	-90.4489	1	4	1.3
967	Ayora	Sep	2002	21.4	Night	Landing	Santa Cruz	Santa Cruz	Centre- South	13.8	-0.73309	-90.4665	1	4	1.575
968	Ayora	Sep	2002	21.4	Day	Landing	Santa Cruz	Santa Cruz	Centre- South	24.6	-0.4984	-90.2414	1	3	3
969	Ayora	Sep	2002	21.4	Day	Landing	Santa Cruz	Santa Cruz	Centre- South	7.42	-0.71	-90.2128	2	5	0.4
970	Ayora	Sep	2002	21.4	Day	Landing	Santa Cruz	Santa Cruz	Centre- South	14	-0.73309	-90.4665	2	4	2.8375
971	Ayora	Sep	2002	21.4	Night	Landing	Santa Cruz	Santa Cruz	Centre- South	14.6	-0.7236	-90.4896	1	8	1.9875
972	Ayora	Sep	2002	21.4	Night	Landing	Santa Cruz	Santa Cruz	Centre- South	13	-0.74564	-90.4489	1	3	1.5
973	Ayora	Sep	2002	21.4	Night	Landing	Santa Cruz	Santa Cruz	Centre- South	11.3	-0.7485	-90.4464	1	7	1.35714
974	Ayora	Sep	2002	21.4	Night	Landing	Santa Cruz	Santa Cruz	Centre- South	14.6	-0.7236	-90.4896	2	8	3.25
975	Ayora	Sep	2002	21.4	Night	Landing	Santa Cruz	Santa Cruz	Centre- South	9.51	-0.75504	-90.4214	1	5	1.8
976	Ayora	Sep	2002	21.4	Night	Landing	Santa Cruz	Santa Cruz	Centre- South	14.6	-0.7236	-90.4896	1	4	0.4
977	Ayora	Sep	2002	21.4	Day	Landing	Santa Cruz	Santa Cruz	Centre- South	7.42	-0.71	-90.2128	1	5	0.22
978	Ayora	Sep	2002	21.4	Day	Landing	Santa Cruz	Santa Cruz	Centre- South	21.2	-0.654	-90.5493	2	6	1.83333
979	Ayora	Sep	2002	21.4	Night	Landing	Santa Cruz	Santa Cruz	Centre- South	14.6	-0.7236	-90.4896	1	3	3
980	Ayora	Sep	2002	21.4	Day	Landing	Santa Cruz	Santa Cruz	Centre- South	7.42	-0.71	-90.2128	1	5	2.2
981	Ayora	Sep	2002	21.4	Night	Landing	Santa Cruz	Santa Cruz	Centre- South	39.5	-0.4888	-90.347	2	4	1.25
982	Ayora	Sep	2002	21.4	Day	Landing	Santa Cruz	Santa Cruz	Centre- South	14	-0.73309	-90.4665	1	8	5.175
983	Ayora	Sep	2002	21.4	Night	Landing	Santa Cruz	Santa Cruz	Centre- South	9.51	-0.75504	-90.4214	1	3	1.96667
984	Ayora	Sep	2002	21.4	Night	Landing	Santa Cruz	Santa Cruz	Centre- South	9.51	-0.75504	-90.4214	1	6	0.75
985	Ayora	Sep	2002	21.4	Night	Landing	Santa Cruz	Santa Cruz	Centre- South	9.51	-0.75504	-90.4214	1	3	0.9
986	Ayora	Sep	2002	21.4	Night	Landing	Santa Cruz	Santa Cruz	Centre- South	24.6	-0.4984	-90.2414	1	16	1.1625
987	Ayora	Sep	2002	21.4	Night	Landing	Santa Cruz	Santa Cruz	Centre- South	13	-0.74564	-90.4489	1	6	0.75
988	Ayora	Sep	2002	21.4	Day	Landing	Santa Cruz	Santa Cruz	Centre- South	11.3	-0.7485	-90.4464	1	3	1.73333
989	Ayora	Sep	2002	21.4	Night	Landing	Santa Cruz	Santa Cruz	Centre- South	13	-0.74564	-90.4489	1	7	4.08571
990	Ayora	Sep	2002	21.4	Night	Landing	Santa Cruz	Santa Cruz	Centre- South	9.51	-0.75504	-90.4214	1	3	1.3
991	Ayora	Sep	2002	21.4	Night	Landing	Santa Cruz	Santa Cruz	Centre- South	21.2	-0.654	-90.5493	1	4	2.375
992	Ayora	Sep	2002	21.4	Night	Landing	Santa Cruz	Santa Cruz	Centre- South	14.6	-0.7236	-90.4896	1	4	1.3
993	Ayora	Sep	2002	21.4	Night	Landing	Santa Cruz	Santa Cruz	Centre- South	14.6	-0.7236	-90.4896	1	5	4.6
994	Ayora	Sep	2002	21.4	Night	Landing	Santa Cruz	Santa Cruz	Centre- South	17.4	-0.7097	-90.5209	1	5	1.72
995	Ayora	Sep	2002	21.4	Night	Landing	Santa Cruz	Santa Cruz	Centre- South	21.2	-0.654	-90.5493	2	3	1.61667
996	Ayora	Sep	2002	21.4	Night	Landing	Santa Cruz	Santa Cruz	Centre- South	14	-0.73309	-90.4665	1	4	0.85
997	Ayora	Sep	2002	21.4	Night	Landing	Santa Cruz	Santa Cruz	Centre- South	21.2	-0.654	-90.5493	1	12	0.716667
998	Ayora	Sep	2002	21.4	Night	Landing	Santa Cruz	Santa Cruz	Centre- South	23.6	-0.6042	-90.5411	1	15	0.573333
999	Ayora	Sep	2002	21.4	Night	Landing	Santa Cruz	Santa Cruz	Centre- South	11.3	-0.7485	-90.4464	1	2	2.6
1000	Ayora	Sep	2002	21.4	Day	Landing	Santa Cruz	Santa Cruz	Centre- South	7.42	-0.71	-90.2128	1	3	0.166667
1001	Ayora	Sep	2002	21.4	Day	Landing	Santa Cruz	Santa Cruz	Centre- South	14.6	-0.7236	-90.4896	1	6	0.833333
1002	Ayora	Sep	2002	21.4	Day	Landing	Santa Cruz	Santa Cruz	Centre- South	7.42	-0.71	-90.2128	1	5	1.2
1003	Ayora	Sep	2002	21.4	Day	Observer	Santa Cruz	Santa Cruz	Centre- South	14	-0.66121	-90.1773	1	4	0.8
1004	Ayora	Sep	2002	21.4	Night	Landing	Santa Cruz	Santa Cruz	Centre- South	14.6	-0.7236	-90.4896	2	2.5	1.72
1005	Ayora	Sep	2002	21.4	Night	Landing	Santa Cruz	Santa Cruz	Centre- South	14.6	-0.7236	-90.4896	1	4	2.25
1006	Ayora	Sep	2002	21.4	Day	Landing	Santa Cruz	Santa Cruz	Centre- South	7.42	-0.71	-90.2128	1	4	0.9
1007	Ayora	Sep	2002	21.4	Night	Landing	Santa Cruz	Santa Cruz	Centre- South	14	-0.73309	-90.4665	1	4	5.625
1008	Ayora	Sep	2002	21.4	Night	Landing	Santa Cruz	Santa Cruz	Centre- South	21.2	-0.654	-90.5493	1	4	0.675
1009	Ayora	Sep	2002	21.4	Day	Landing	Santa Cruz	Santa Cruz	Centre- South	7.42	-0.71	-90.2128	1	4	0.05
1010	Ayora	Sep	2002	21.4	Night	Landing	Santa Cruz	Santa Cruz	Centre- South	24.6	0.06442	-91.5048	7	5	1
1011	Ayora	Sep	2002	21.3	Night	Landing	Santa Fe	Santa Fe	Centre- South	14.8	-0.795	-90.0667	1	6	1.25
1012	Ayora	Sep	2002	21.3	Night	Landing	Santa Fe	Santa Fe	Centre- South	14.8	-0.795	-90.0667	2	6	1.05833
1013	Ayora	Sep	2002	21.3	Night	Landing	Santa Fe	Santa Fe	Centre- South	17.5	-0.8404	-90.0434	1	6	1.5
1014	Ayora	Sep	2002	21.3	Day	Landing	Santa Fe	Santa Fe	Centre- South	18.5	-0.82133	-90.0293	1	4	0.55
1015	Ayora	Sep	2002	21.3	Day	Landing	Santa Fe	Santa Fe	Centre- South	18.5	-0.82133	-90.0293	1	6	0.666667
1016	Ayora	Sep	2002	21.3	Night	Landing	Santa Fe	Santa Fe	Centre- South	14.8	-0.795	-90.0667	1	4	1.6
1017	Baquerizo	Sep	2002	21.3	Night	Landing	Santa Fe	Santa Fe	Centre- South	29.8	-0.82133	-90.0293	1	8	1.795
1018	Baquerizo	Sep	2002	21.3	Night	Observer	Santa Fe	Santa Fe	Centre- South	29.8	-0.80421	-90.039	2	5	1.96
1019	Baquerizo	Sep	2002	21.3	Night	Observer	Santa Fe	Santa Fe	Centre- South	30.2	-0.80421	-90.039	2	6	0.819444
1020	Baquerizo	Sep	2002	21.3	Night	Observer	Santa Fe	Santa Fe	Centre- South	31.2	-0.79671	-90.0531	1	8	2.8375
1021	Baquerizo	Sep	2002	21.3	Night	Observer	Santa Fe	Santa Fe	Centre- South	30.2	-0.8404	-90.0434	2	6	0.641667
1022	Baquerizo	Sep	2002	21.3	Night	Observer	Santa Fe	Santa Fe	Centre- South	31.2	-0.78671	-90.0531	1	4	0.9
1023	Baquerizo	Sep	2002	21.3	Night	Observer	Santa Fe	Santa Fe	Centre- South	30.2	-0.8404	-90.0434	1	5	1.08
1024	Ayora	Sep	2002	22.4	Day	Observer	Santiago	Santiago	Centre- South	40.6	-0.3518	-90.6716	1	5	2.2
1025	Ayora	Sep	2002	22.4	Day	Observer	Santiago	Santiago	Centre- South	51.3	-0.28955	-90.927	1	6	2.16667
1026	Ayora	Sep	2002	22.4	Day	Observer	Santiago	Santiago	Centre- South	51.3	-0.28955	-90.927	2	5	0.8
1027	Ayora	Sep	2002	22.4	Night	Observer	Santiago	Santiago	Centre- South	51.3	-0.28955	-90.927	2	2	0.75
1028	Ayora	Sep	2002	22.4	Day	Landing	Santiago	Santiago	Centre- South	49.9	-0.23399	-90.5813	1	10	1.935
1029	Ayora	Sep	2002	22.4	Night	Landing	Santiago	Santiago	Centre- South	40.6	-0.3518	-90.6716	1	12	3.70833
1030	Ayora	Sep	2002	22.4	Day	Landing	Santiago	Santiago	Centre- South	51.3	-0.28955	-90.927	2	6	0.416667
1031	Ayora	Sep	2002	22.4	Day	Landing	Santiago	Santiago	Centre- South	45.8	-0.1917	-90.6472	2	15	0.56
1032	Ayora	Sep	2002	22.4	Day	Observer	Santiago	Santiago	Centre- South	51.3	-0.28955	-90.927	2	5	0.1
1033	Ayora	Sep	2002	22.4	Night	Observer	Santiago	Santiago	Centre- South	40.6	-0.3518	-90.6716	2	3	1.33333
1034	Ayora	Sep	2002	22.4	Night	Observer	Santiago	Santiago	Centre- South	51.3	-0.28955	-90.927	2	2	0.25
1035	Ayora	Sep	2002	22.4	Night	Landing	Santiago	Santiago	Centre- South	60.4	-0.435	-90.701	1	3	2.7
1036	Ayora	Sep	2002	22.4	Night	Landing	Santiago	Santiago	Centre- South	60.2	-0.1647	-90.8354	1	3	3.8
1037	Ayora	Sep	2002	22.4	Night	Landing	Santiago	Santiago	Centre- South	59	-0.17171	-90.8315	1	2	2.75
1038	Ayora	Sep	2002	22.4	Night	Landing	Santiago	Santiago	Centre- South	60.4	-0.15665	-90.7374	2	4	0.75
1039	Ayora	Sep	2002	22.4	Night	Landing	Santiago	Santiago	Centre- South	60.4	-0.15665	-90.7374	2	3	1.43333
1040	Ayora	Sep	2002	22.4	Night	Landing	Santiago	Santiago	Centre- South	51.3	-0.28955	-90.927	2	2	0.575
1041	Ayora	Sep	2002	22.4	Night	Landing	Santiago	Santiago	Centre- South	51.3	-0.28955	-90.927	2	2.5	0.82
1042	Ayora	Sep	2002	22.4	Night	Landing	Santiago	Santiago	Centre- South	60.2	-0.1647	-90.8354	2	4	1.0125
1043	Ayora	Sep	2002	22.4	Night	Landing	Santiago	Santiago	Centre- South	60.4	-0.15665	-90.7374	2	4	0.6875
1044	Ayora	Sep	2002	22.4	Night	Landing	Santiago	Santiago	Centre- South	51.3	-0.28955	-90.927	2	2	1.375
1045	Ayora	Sep	2002	22.4	Night	Landing	Santiago	Santiago	Centre- South	60.2	-0.1647	-90.8354	2	4	3.5
1046	Ayora	Sep	2002	22.4	Night	Landing	Santiago	Santiago	Centre- South	60.4	-0.15665	-90.7374	2	4	1.1875
1047	Baquerizo	Sep	2002	22.4	Night	Observer	Santiago	Santiago	Centre- South	103	-0.1647	-90.8354	1	7	2.39714
1048	Baquerizo	Sep	2002	22.4	Night	Observer	Santiago	Santiago	Centre- South	103	-0.1647	-90.8354	1	4	0.7925
1049	Baquerizo	Sep	2002	22.4	Night	Observer	Santiago	Santiago	Centre- South	82.3	-0.16729	-90.7137	2	5	1.451
1050	Baquerizo	Sep	2002	22.4	Night	Observer	Santiago	Santiago	Centre- South	103	-0.1647	-90.8354	1	6	1.58667
1051	Baquerizo	Sep	2002	22.4	Night	Observer	Santiago	Santiago	Centre- South	82.3	-0.23399	-90.5813	1	5	1.904
1052	Baquerizo	Sep	2002	22.4	Night	Observer	Santiago	Santiago	Centre- South	103	-0.1647	-90.8354	1	6	1.51167
1053	Baquerizo	Sep	2002	22.4	Night	Observer	Santiago	Santiago	Centre- South	82.3	-0.17382	-90.699	1	6	2.645
1054	Baquerizo	Sep	2002	22.4	Night	Observer	Santiago	Santiago	Centre- South	103	-0.1647	-90.8354	1	6	1.135
1055	Baquerizo	Sep	2002	22.4	Night	Observer	Santiago	Santiago	Centre- South	103	-0.1647	-90.8354	1	6	1.13333
1056	Baquerizo	Sep	2002	22.4	Night	Observer	Santiago	Santiago	Centre- South	82.3	-0.23399	-90.5813	2	1	5.665
1057	Baquerizo	Sep	2002	22.4	Night	Observer	Santiago	Santiago	Centre- South	103	-0.1647	-90.8354	2	7	1.32786
1058	Baquerizo	Sep	2002	22.4	Night	Observer	Santiago	Santiago	Centre- South	103	-0.1647	-90.8354	2	6	2.15417
1059	Baquerizo	Sep	2002	22.4	Night	Observer	Santiago	Santiago	Centre- South	82.3	-0.23399	-90.5813	8	32	0.31707
1060	Baquerizo	Sep	2002	22.4	Night	Observer	Santiago	Santiago	Centre- South	103	-0.1647	-90.8354	8	36	0.152743
1061	Baquerizo	Oct	2002	22.1	Day	Landing	San Cristobal N y O	San Cristobal	Centre- South	22	-0.683	-89.3279	1	8	2.38625
1062	Baquerizo	Oct	2002	22.1	Night	Observer	San Cristobal N y O	San Cristobal	Centre- South	12.8	-0.75834	-89.4644	1	6	1.05667
1063	Baquerizo	Oct	2002	22.1	Day	Landing	San Cristobal N y O	San Cristobal	Centre- South	22	-0.683	-89.3279	1	6	0.435
1064	Baquerizo	Oct	2002	22.1	Day	Landing	San Cristobal N y O	San Cristobal	Centre- South	22	-0.683	-89.3279	2	5	0.101
1065	Baquerizo	Oct	2002	22.1	Night	Landing	San Cristobal N y O	San Cristobal	Centre- South	19.8	-0.7042	-89.3752	1	3	0.753333
1066	Baquerizo	Oct	2002	23	Day	Landing	San Cristobal S y E	San Cristobal	Centre- South	26.2	-0.8626	-89.367	1	8	0.4525
1067	Baquerizo	Oct	2002	23	Day	Landing	San Cristobal S y E	San Cristobal	Centre- South	27.8	-0.842495	-89.3527	1	8	0.22625
1068	Baquerizo	Oct	2002	23	Night	Landing	San Cristobal S y E	San Cristobal	Centre- South	5.41	-0.94788	-89.587	2	6	0.36
1069	Baquerizo	Oct	2002	23	Night	Landing	San Cristobal S y E	San Cristobal	Centre- South	11.2	-0.9497	-89.4963	1	7	0.614286
1070	Baquerizo	Oct	2002	23	Night	Landing	San Cristobal S y E	San Cristobal	Centre- South	8.25	-0.95585	-89.5428	1	5	0.94
1071	Baquerizo	Oct	2002	23	Night	Landing	San Cristobal S y E	San Cristobal	Centre- South	11.2	-0.9497	-89.4963	2	4	0.417917
1072	Baquerizo	Oct	2002	23	Day	Landing	San Cristobal S y E	San Cristobal	Centre- South	17.4	-0.9254	-89.4113	2	8	0.425
1073	Baquerizo	Oct	2002	23	Night	Landing	San Cristobal S y E	San Cristobal	Centre- South	17.4	-0.9254	-89.4113	1	7	0.366667
1074	Baquerizo	Oct	2002	23	Night	Landing	San Cristobal S y E	San Cristobal	Centre- South	26	-0.71267	-89.2403	1	5	3.76
1075	Baquerizo	Oct	2002	23	Night	Landing	San Cristobal S y E	San Cristobal	Centre- South	5.41	-0.94788	-89.587	1	6	0.477778
1076	Baquerizo	Oct	2002	23	Night	Landing	San Cristobal S y E	San Cristobal	Centre- South	5.41	-0.94788	-89.587	1	4	0.490833
1077	Baquerizo	Oct	2002	23	Night	Landing	San Cristobal S y E	San Cristobal	Centre- South	17.4	-0.9254	-89.4113	1	5	1.26933
1078	Baquerizo	Oct	2002	23	Night	Landing	San Cristobal S y E	San Cristobal	Centre- South	17.4	-0.9254	-89.4113	1	5	0.84
1079	Baquerizo	Oct	2002	23	Night	Landing	San Cristobal S y E	San Cristobal	Centre- South	17.4	-0.9254	-89.4113	1	4	2.2675
1080	Baquerizo	Oct	2002	23	Day	Landing	San Cristobal S y E	San Cristobal	Centre- South	5.41	-0.94788	-89.587	2	6	0.45
1081	Baquerizo	Oct	2002	23	Night	Landing	San Cristobal S y E	San Cristobal	Centre- South	6.1	-0.9409	-89.5906	1	5	0.612667
1082	Baquerizo	Oct	2002	23	Night	Landing	San Cristobal S y E	San Cristobal	Centre- South	6.1	-0.9409	-89.5906	1	5	0.324667
1083	Baquerizo	Oct	2002	23	Night	Landing	San Cristobal S y E	San Cristobal	Centre- South	5.41	-0.94788	-89.587	1	4	0.4975
1084	Baquerizo	Oct	2002	23	Day	Landing	San Cristobal S y E	San Cristobal	Centre- South	17.4	-0.9254	-89.4113	2	7	0.12
1085	Baquerizo	Oct	2002	23	Day	Landing	San Cristobal S y E	San Cristobal	Centre- South	26.2	-0.8626	-89.367	1	8	0.85
1086	Baquerizo	Oct	2002	23	Day	Landing	San Cristobal S y E	San Cristobal	Centre- South	27.8	-0.842495	-89.3527	2	7	0.420714
1087	Baquerizo	Oct	2002	23	Day	Landing	San Cristobal S y E	San Cristobal	Centre- South	27.8	-0.842495	-89.3527	2	6	0.736667
1088	Baquerizo	Oct	2002	23	Night	Landing	San Cristobal S y E	San Cristobal	Centre- South	17.4	-0.9254	-89.4113	2	4	0.283333
1089	Baquerizo	Oct	2002	23	Night	Landing	San Cristobal S y E	San Cristobal	Centre- South	17.4	-0.9254	-89.4113	1	4	0.941667
1090	Baquerizo	Oct	2002	23	Night	Landing	San Cristobal S y E	San Cristobal	Centre- South	17.4	-0.9254	-89.4113	2	8	0.708333
1091	Baquerizo	Oct	2002	23	Night	Landing	San Cristobal S y E	San Cristobal	Centre- South	5.41	-0.94788	-89.587	1	4	0.566667
1092	Baquerizo	Oct	2002	23	Night	Landing	San Cristobal S y E	San Cristobal	Centre- South	6.1	-0.9409	-89.5906	2	3	0.955556
1093	Baquerizo	Oct	2002	23	Day	Landing	San Cristobal S y E	San Cristobal	Centre- South	26	-0.71267	-89.2403	1	3	3.76667
1094	Baquerizo	Oct	2002	23	Night	Landing	San Cristobal S y E	San Cristobal	Centre- South	6.1	-0.9409	-89.5906	1	3	1.51111
1095	Baquerizo	Oct	2002	23	Night	Landing	San Cristobal S y E	San Cristobal	Centre- South	6.1	-0.9409	-89.5906	2	6	1.965
1096	Baquerizo	Oct	2002	23	Night	Observer	San Cristobal S y E	San Cristobal	Centre- South	5.41	-0.94025	-89.5889	1	6	1.13333
1097	Baquerizo	Oct	2002	23	Night	Landing	San Cristobal S y E	San Cristobal	Centre- South	5.41	-0.94788	-89.587	1	7	0.97381
1098	Baquerizo	Oct	2002	23	Night	Landing	San Cristobal S y E	San Cristobal	Centre- South	9.5	-0.9557	-89.5197	1	6	1.36333
1099	Baquerizo	Oct	2002	23	Night	Landing	San Cristobal S y E	San Cristobal	Centre- South	15.5	-0.93575	-89.4399	1	8	1.5625
1100	Baquerizo	Oct	2002	23	Night	Landing	San Cristobal S y E	San Cristobal	Centre- South	32.6	-0.674	-89.248	1	7	3.65714
1101	Baquerizo	Oct	2002	23	Day	Landing	San Cristobal S y E	San Cristobal	Centre- South	27.8	-0.842495	-89.3527	1	5	0.92
1102	Baquerizo	Oct	2002	23	Night	Landing	San Cristobal S y E	San Cristobal	Centre- South	6.1	-0.9409	-89.5906	1	4	0.7575
1103	Baquerizo	Oct	2002	23	Night	Landing	San Cristobal S y E	San Cristobal	Centre- South	11.2	-0.9497	-89.4963	1	7	0.97381
1104	Baquerizo	Oct	2002	23	Night	Landing	San Cristobal S y E	San Cristobal	Centre- South	5.41	-0.94788	-89.587	1	5	2.75733
1105	Baquerizo	Oct	2002	23	Night	Landing	San Cristobal S y E	San Cristobal	Centre- South	17.4	-0.9254	-89.4113	2	8	0.5375
1106	Baquerizo	Oct	2002	23	Night	Landing	San Cristobal S y E	San Cristobal	Centre- South	5.41	-0.94788	-89.587	1	8	1.5875
1107	Baquerizo	Oct	2002	23	Night	Landing	San Cristobal S y E	San Cristobal	Centre- South	12.9	-0.9554	-89.5136	1	8	1.42
1108	Baquerizo	Oct	2002	23	Night	Landing	San Cristobal S y E	San Cristobal	Centre- South	11.2	-0.9497	-89.4963	2	5	1.727
1109	Baquerizo	Oct	2002	23	Night	Landing	San Cristobal S y E	San Cristobal	Centre- South	17.4	-0.9254	-89.4113	2	5	1.636
1110	Baquerizo	Oct	2002	23	Night	Landing	San Cristobal S y E	San Cristobal	Centre- South	27.8	-0.842495	-89.3527	2	20	1.0795
1111	Baquerizo	Oct	2002	23	Night	Landing	San Cristobal S y E	San Cristobal	Centre- South	27.8	-0.842495	-89.3527	2	15	1.924
1112	Baquerizo	Oct	2002	23	Night	Landing	San Cristobal S y E	San Cristobal	Centre- South	27.8	-0.842495	-89.3527	2	15	0.536667
1113	Baquerizo	Oct	2002	23	Day	Landing	San Cristobal S y E	San Cristobal	Centre- South	27.8	-0.842495	-89.3527	2	15	1.23333
1114	Baquerizo	Oct	2002	23	Night	Landing	San Cristobal S y E	San Cristobal	Centre- South	27.8	-0.842495	-89.3527	1	15	2.46
1115	Ayora	Oct	2002	21.7	Night	Landing	Santa Cruz	Santa Cruz	Centre- South	14.6	-0.7236	-90.4896	1	4	0.9
1116	Ayora	Oct	2002	21.7	Day	Landing	Santa Cruz	Santa Cruz	Centre- South	5.62	-0.7354	-90.2324	1	4	1.925
1117	Ayora	Oct	2002	21.7	Day	Landing	Santa Cruz	Santa Cruz	Centre- South	5.62	-0.7354	-90.2324	1	4	0.6
1118	Ayora	Oct	2002	21.7	Day	Landing	Santa Cruz	Santa Cruz	Centre- South	9.51	-0.75504	-90.4214	2	5	2.3
1119	Ayora	Oct	2002	21.7	Day	Landing	Santa Cruz	Santa Cruz	Centre- South	38.6	-0.49725	-90.371	1	4	2.75
1120	Ayora	Oct	2002	21.7	Night	Landing	Santa Cruz	Santa Cruz	Centre- South	21.2	-0.654	-90.5493	1	4	0.8
1121	Ayora	Oct	2002	21.7	Night	Landing	Santa Cruz	Santa Cruz	Centre- South	14.6	-0.7236	-90.4896	1	4	2.75
1122	Ayora	Oct	2002	21.7	Night	Landing	Santa Cruz	Santa Cruz	Centre- South	11.3	-0.7485	-90.4464	2	3	1.46667
1123	Ayora	Oct	2002	21.7	Night	Landing	Santa Cruz	Santa Cruz	Centre- South	14.6	-0.7236	-90.4896	2	4.5	1.16667
1124	Ayora	Oct	2002	21.7	Day	Landing	Santa Cruz	Santa Cruz	Centre- South	7.42	-0.71	-90.2128	2	3	0.983333
1125	Ayora	Oct	2002	21.7	Night	Landing	Santa Cruz	Santa Cruz	Centre- South	11.3	-0.7485	-90.4464	1	4	1.75
1126	Ayora	Oct	2002	21.7	Night	Landing	Santa Cruz	Santa Cruz	Centre- South	13	-0.74564	-90.4489	1	4	2.2
1127	Ayora	Oct	2002	21.7	Night	Landing	Santa Cruz	Santa Cruz	Centre- South	13	-0.74564	-90.4489	1	4	2.5
1128	Ayora	Oct	2002	21.7	Day	Landing	Santa Cruz	Santa Cruz	Centre- South	14	-0.73309	-90.4665	1	5	1.6
1129	Ayora	Oct	2002	21.7	Day	Landing	Santa Cruz	Santa Cruz	Centre- South	14.6	-0.7236	-90.4896	2	8	1.59375
1130	Ayora	Oct	2002	21.7	Night	Landing	Santa Cruz	Santa Cruz	Centre- South	14.6	-0.7236	-90.4896	1	5	2
1131	Ayora	Oct	2002	21.7	Night	Landing	Santa Cruz	Santa Cruz	Centre- South	9.51	-0.75504	-90.4214	2	4	0.45
1132	Ayora	Oct	2002	21.7	Night	Landing	Santa Cruz	Santa Cruz	Centre- South	14.6	-0.7236	-90.4896	1	4	4.325
1133	Ayora	Oct	2002	21.7	Day	Landing	Santa Cruz	Santa Cruz	Centre- South	7.42	-0.71	-90.2128	1	4	0.575
1134	Ayora	Oct	2002	21.7	Night	Landing	Santa Cruz	Santa Cruz	Centre- South	5.62	-0.7354	-90.2324	1	4	1.125
1135	Ayora	Oct	2002	21.7	Night	Landing	Santa Cruz	Santa Cruz	Centre- South	14.6	-0.7236	-90.4896	2	4.5	1.53333
1136	Ayora	Oct	2002	21.7	Night	Landing	Santa Cruz	Santa Cruz	Centre- South	14.6	-0.7236	-90.4896	1	4	3.625
1137	Ayora	Oct	2002	21.7	Night	Landing	Santa Cruz	Santa Cruz	Centre- South	13	-0.74564	-90.4489	2	3.5	0.257143
1138	Ayora	Oct	2002	21.7	Day	Landing	Santa Cruz	Santa Cruz	Centre- South	11.3	-0.7485	-90.4464	1	3	0.433333
1139	Ayora	Oct	2002	21.7	Day	Landing	Santa Cruz	Santa Cruz	Centre- South	11.3	-0.7485	-90.4464	2	4	0.375
1140	Ayora	Oct	2002	21.7	Day	Landing	Santa Cruz	Santa Cruz	Centre- South	11.3	-0.7485	-90.4464	1	5	0.68
1141	Ayora	Oct	2002	21.7	Day	Landing	Santa Cruz	Santa Cruz	Centre- South	11.3	-0.7485	-90.4464	1	5	1.2
1142	Ayora	Oct	2002	21.7	Night	Landing	Santa Cruz	Santa Cruz	Centre- South	14.6	-0.7236	-90.4896	1	4	5.3
1143	Ayora	Oct	2002	21.7	Day	Landing	Santa Cruz	Santa Cruz	Centre- South	10	-0.68739	-90.1925	1	4	1.7
1144	Ayora	Oct	2002	21.7	Night	Landing	Santa Cruz	Santa Cruz	Centre- South	11.3	-0.7485	-90.4464	1	1	3.2
1145	Ayora	Oct	2002	21.7	Day	Landing	Santa Cruz	Santa Cruz	Centre- South	9.51	-0.75504	-90.4214	1	3	0.666667
1146	Ayora	Oct	2002	21.7	Day	Landing	Santa Cruz	Santa Cruz	Centre- South	9.51	-0.75504	-90.4214	1	4	1.375
1147	Ayora	Oct	2002	21.7	Day	Landing	Santa Cruz	Santa Cruz	Centre- South	11.3	-0.7485	-90.4464	2	3	0.566667
1148	Ayora	Oct	2002	21.7	Day	Landing	Santa Cruz	Santa Cruz	Centre- South	10	-0.68739	-90.1925	1	4	1.125
1149	Ayora	Oct	2002	21.7	Night	Landing	Santa Cruz	Santa Cruz	Centre- South	14	-0.73309	-90.4665	1	4	1.925
1150	Ayora	Oct	2002	21.7	Day	Landing	Santa Cruz	Santa Cruz	Centre- South	13	-0.74564	-90.4489	1	4	0.35
1151	Ayora	Oct	2002	21.7	Day	Landing	Santa Cruz	Santa Cruz	Centre- South	9.51	-0.75504	-90.4214	1	7	0.328571
1152	Ayora	Oct	2002	21.7	Day	Landing	Santa Cruz	Santa Cruz	Centre- South	11.3	-0.7485	-90.4464	1	4	1.75
1153	Ayora	Oct	2002	21.7	Day	Landing	Santa Cruz	Santa Cruz	Centre- South	11.3	-0.7485	-90.4464	1	7	0.757143
1154	Ayora	Oct	2002	21.7	Day	Landing	Santa Cruz	Santa Cruz	Centre- South	11.3	-0.7485	-90.4464	1	7	0.614286
1155	Ayora	Oct	2002	21.7	Day	Landing	Santa Cruz	Santa Cruz	Centre- South	9.51	-0.75504	-90.4214	1	4	0.375
1156	Ayora	Oct	2002	21.7	Day	Landing	Santa Cruz	Santa Cruz	Centre- South	11.3	-0.7485	-90.4464	1	5	1.46
1157	Ayora	Oct	2002	21.7	Day	Landing	Santa Cruz	Santa Cruz	Centre- South	9.51	-0.75504	-90.4214	1	4	1.075
1158	Ayora	Oct	2002	21.7	Day	Landing	Santa Cruz	Santa Cruz	Centre- South	9.51	-0.75504	-90.4214	1	5	0.36
1159	Ayora	Oct	2002	21.7	Night	Landing	Santa Cruz	Santa Cruz	Centre- South	9.51	-0.75504	-90.4214	1	8	3.125
1160	Ayora	Oct	2002	21.7	Day	Landing	Santa Cruz	Santa Cruz	Centre- South	21.2	-0.654	-90.5493	1	6	0.983333
1161	Ayora	Oct	2002	21.7	Day	Landing	Santa Cruz	Santa Cruz	Centre- South	7.42	-0.71	-90.2128	1	3	0.766667
1162	Ayora	Oct	2002	21.7	Night	Landing	Santa Cruz	Santa Cruz	Centre- South	14	-0.73309	-90.4665	1	4	1.025
1163	Ayora	Oct	2002	21.7	Night	Landing	Santa Cruz	Santa Cruz	Centre- South	14.6	-0.7236	-90.4896	1	18	2
1164	Ayora	Oct	2002	21.7	Night	Landing	Santa Cruz	Santa Cruz	Centre- South	9.51	-0.75504	-90.4214	1	10	2.55
1165	Ayora	Oct	2002	21.7	Day	Landing	Santa Cruz	Santa Cruz	Centre- South	11.3	-0.7485	-90.4464	2	4	0.175
1166	Ayora	Oct	2002	21.7	Night	Landing	Santa Cruz	Santa Cruz	Centre- South	11.3	-0.7485	-90.4464	2	5	1.18
1167	Ayora	Oct	2002	21.7	Night	Landing	Santa Cruz	Santa Cruz	Centre- South	13	-0.74564	-90.4489	1	8	2.2625
1168	Ayora	Oct	2002	21.7	Day	Landing	Santa Cruz	Santa Cruz	Centre- South	11.3	-0.7485	-90.4464	2	3	0.916667
1169	Ayora	Oct	2002	21.7	Night	Landing	Santa Cruz	Santa Cruz	Centre- South	14.6	-0.7236	-90.4896	1	10	0.45
1170	Ayora	Oct	2002	21.7	Night	Landing	Santa Cruz	Santa Cruz	Centre- South	9.51	-0.75504	-90.4214	1	3	1.23333
1171	Ayora	Oct	2002	21.7	Day	Landing	Santa Cruz	Santa Cruz	Centre- South	9.51	-0.75504	-90.4214	1	5	0.74
1172	Ayora	Oct	2002	21.7	Day	Landing	Santa Cruz	Santa Cruz	Centre- South	11.3	-0.7485	-90.4464	1	3	0.133333
1173	Ayora	Oct	2002	21.7	Night	Landing	Santa Cruz	Santa Cruz	Centre- South	11.3	-0.7485	-90.4464	1	3	4.9
1174	Ayora	Oct	2002	21.7	Night	Landing	Santa Cruz	Santa Cruz	Centre- South	11.3	-0.7485	-90.4464	1	4	5
1175	Ayora	Oct	2002	21.7	Night	Landing	Santa Cruz	Santa Cruz	Centre- South	14	-0.73309	-90.4665	1	5	4.3
1176	Ayora	Oct	2002	21.7	Day	Landing	Santa Cruz	Santa Cruz	Centre- South	9.51	-0.75504	-90.4214	1	4	1.5
1177	Ayora	Oct	2002	21.7	Day	Landing	Santa Cruz	Santa Cruz	Centre- South	2.78	-0.77996	-90.3263	1	3	1
1178	Ayora	Oct	2002	21.7	Day	Landing	Santa Cruz	Santa Cruz	Centre- South	11.3	-0.7485	-90.4464	1	4	0.8
1179	Ayora	Oct	2002	21.7	Night	Landing	Santa Cruz	Santa Cruz	Centre- South	5.62	-0.7354	-90.2324	1	4	0.9
1180	Ayora	Oct	2002	21.7	Day	Landing	Santa Cruz	Santa Cruz	Centre- South	7.42	-0.71	-90.2128	1	4	0.4
1181	Ayora	Oct	2002	21.7	Day	Landing	Santa Cruz	Santa Cruz	Centre- South	9.51	-0.75504	-90.4214	2	2.5	0.4
1182	Ayora	Oct	2002	21.7	Night	Landing	Santa Cruz	Santa Cruz	Centre- South	21.2	-0.654	-90.5493	1	3	1.5
1183	Ayora	Oct	2002	21.7	Night	Landing	Santa Cruz	Santa Cruz	Centre- South	14.6	-0.7236	-90.4896	1	3	1.5
1184	Ayora	Oct	2002	21.7	Night	Landing	Santa Cruz	Santa Cruz	Centre- South	13.8	-0.73309	-90.4665	1	24	0.708333
1185	Ayora	Oct	2002	21.7	Day	Landing	Santa Cruz	Santa Cruz	Centre- South	11.3	-0.7485	-90.4464	1	4	0.725
1186	Ayora	Oct	2002	21.7	Night	Observer	Santa Cruz	Santa Cruz	Centre- South	9.51	-0.77244	-90.3518	1	3	1.83333
1187	Ayora	Oct	2002	21.7	Night	Observer	Santa Cruz	Santa Cruz	Centre- South	11.3	-0.76013	-90.4202	2	5	0.76
1188	Ayora	Oct	2002	21.7	Night	Landing	Santa Cruz	Santa Cruz	Centre- South	11.3	-0.7485	-90.4464	2	2	1.25
1189	Ayora	Oct	2002	21.7	Night	Landing	Santa Cruz	Santa Cruz	Centre- South	9.51	-0.75504	-90.4214	1	4	1
1190	Ayora	Oct	2002	21.7	Night	Landing	Santa Cruz	Santa Cruz	Centre- South	17.4	-0.7097	-90.5209	1	8	1.7
1191	Ayora	Oct	2002	21.7	Night	Landing	Santa Cruz	Santa Cruz	Centre- South	9.51	-0.75504	-90.4214	1	5	0.8
1192	Ayora	Oct	2002	21.7	Night	Landing	Santa Cruz	Santa Cruz	Centre- South	9.51	-0.75504	-90.4214	1	6	1.5
1193	Ayora	Oct	2002	21.7	Day	Landing	Santa Cruz	Santa Cruz	Centre- South	9.51	-0.75504	-90.4214	2	6	0.0583333
1194	Ayora	Oct	2002	21.7	Day	Landing	Santa Cruz	Santa Cruz	Centre- South	9.51	-0.75504	-90.4214	1	5	0.72
1195	Ayora	Oct	2002	21.7	Night	Landing	Santa Cruz	Santa Cruz	Centre- South	11.3	-0.7485	-90.4464	1	3	3.33333
1196	Ayora	Oct	2002	21.7	Day	Landing	Santa Cruz	Santa Cruz	Centre- South	11.3	-0.7485	-90.4464	1	5	0.136
1197	Ayora	Oct	2002	21.7	Day	Landing	Santa Cruz	Santa Cruz	Centre- South	2.78	-0.77996	-90.3263	2	4	0.1375
1198	Ayora	Oct	2002	21.7	Night	Landing	Santa Cruz	Santa Cruz	Centre- South	11.3	-0.7485	-90.4464	1	5	5.72
1199	Ayora	Oct	2002	21.7	Night	Landing	Santa Cruz	Santa Cruz	Centre- South	7.42	-0.71	-90.2128	1	11	1.96364
1200	Ayora	Oct	2002	21.7	Day	Landing	Santa Cruz	Santa Cruz	Centre- South	7.42	-0.71	-90.2128	1	4	0.675
1201	Ayora	Oct	2002	21.7	Day	Landing	Santa Cruz	Santa Cruz	Centre- South	24.6	-0.4984	-90.2414	1	14	1.32857
1202	Ayora	Oct	2002	21.7	Day	Landing	Santa Cruz	Santa Cruz	Centre- South	11.3	-0.7485	-90.4464	1	5	0.7
1203	Ayora	Oct	2002	21.7	Day	Landing	Santa Cruz	Santa Cruz	Centre- South	9.51	-0.75504	-90.4214	1	4	0.375
1204	Ayora	Oct	2002	21.7	Day	Landing	Santa Cruz	Santa Cruz	Centre- South	7.42	-0.71	-90.2128	1	5	1.3
1205	Ayora	Oct	2002	21.7	Night	Landing	Santa Cruz	Santa Cruz	Centre- South	9.51	-0.75504	-90.4214	2	4	1.8125
1206	Ayora	Oct	2002	21.7	Night	Landing	Santa Cruz	Santa Cruz	Centre- South	9.51	-0.75504	-90.4214	1	5	0.7
1207	Ayora	Oct	2002	21.7	Night	Landing	Santa Cruz	Santa Cruz	Centre- South	21.2	-0.654	-90.5493	2	8	1.625
1208	Ayora	Oct	2002	21.7	Night	Landing	Santa Cruz	Santa Cruz	Centre- South	11.3	-0.7485	-90.4464	1	4	3.875
1209	Ayora	Oct	2002	21.7	Night	Landing	Santa Cruz	Santa Cruz	Centre- South	14.6	-0.7236	-90.4896	1	4	1.575
1210	Ayora	Oct	2002	21.7	Night	Landing	Santa Cruz	Santa Cruz	Centre- South	21.2	-0.654	-90.5493	2	6	1.375
1211	Ayora	Oct	2002	21.7	Night	Landing	Santa Cruz	Santa Cruz	Centre- South	14.6	-0.7236	-90.4896	1	5	4.86
1212	Ayora	Oct	2002	21.7	Night	Landing	Santa Cruz	Santa Cruz	Centre- South	14.6	-0.7236	-90.4896	2	4	1.75
1213	Ayora	Oct	2002	21.7	Night	Landing	Santa Cruz	Santa Cruz	Centre- South	14.6	-0.7236	-90.4896	1	4	5.25
1214	Ayora	Oct	2002	21.7	Night	Landing	Santa Cruz	Santa Cruz	Centre- South	14	-0.73309	-90.4665	2	12	0.0833333
1215	Ayora	Oct	2002	21.7	Day	Landing	Santa Cruz	Santa Cruz	Centre- South	11.3	-0.7485	-90.4464	1	1	3
1216	Ayora	Oct	2002	21.7	Day	Landing	Santa Cruz	Santa Cruz	Centre- South	14.6	-0.7236	-90.4896	2	5	1.3
1217	Ayora	Oct	2002	21.7	Day	Landing	Santa Cruz	Santa Cruz	Centre- South	13	-0.74564	-90.4489	1	4	0.75
1218	Ayora	Oct	2002	21.7	Night	Landing	Santa Cruz	Santa Cruz	Centre- South	14.6	-0.7236	-90.4896	1	4	2.125
1219	Ayora	Oct	2002	21.7	Day	Landing	Santa Cruz	Santa Cruz	Centre- South	7.42	-0.71	-90.2128	1	3	0.9
1220	Ayora	Oct	2002	21.7	Day	Landing	Santa Cruz	Santa Cruz	Centre- South	14	-0.73309	-90.4665	1	2	1
1221	Ayora	Oct	2002	21.7	Day	Landing	Santa Cruz	Santa Cruz	Centre- South	14.6	-0.7236	-90.4896	1	6	0.266667
1222	Ayora	Oct	2002	21.7	Day	Landing	Santa Cruz	Santa Cruz	Centre- South	14	-0.73309	-90.4665	1	4	0.1125
1223	Ayora	Oct	2002	21.7	Day	Landing	Santa Cruz	Santa Cruz	Centre- South	9.51	-0.75504	-90.4214	1	4	0.675
1224	Ayora	Oct	2002	21.7	Day	Landing	Santa Cruz	Santa Cruz	Centre- South	14	-0.73309	-90.4665	1	6	0.566667
1225	Ayora	Oct	2002	21.7	Day	Landing	Santa Cruz	Santa Cruz	Centre- South	11.3	-0.7485	-90.4464	1	5	0.6
1226	Ayora	Oct	2002	21.7	Day	Landing	Santa Cruz	Santa Cruz	Centre- South	13	-0.74564	-90.4489	1	4	0.55
1227	Ayora	Oct	2002	21.7	Day	Landing	Santa Cruz	Santa Cruz	Centre- South	9.51	-0.75504	-90.4214	1	4	1
1228	Ayora	Oct	2002	21.7	Day	Landing	Santa Cruz	Santa Cruz	Centre- South	9.51	-0.75504	-90.4214	1	4	0.375
1229	Ayora	Oct	2002	21.7	Day	Landing	Santa Cruz	Santa Cruz	Centre- South	9.51	-0.75504	-90.4214	1	5	0.8
1230	Ayora	Oct	2002	21.7	Day	Landing	Santa Cruz	Santa Cruz	Centre- South	9.51	-0.75504	-90.4214	1	4	0.5
1231	Ayora	Oct	2002	21.7	Day	Landing	Santa Cruz	Santa Cruz	Centre- South	7.42	-0.71	-90.2128	1	5	0.1
1232	Ayora	Oct	2002	21.7	Day	Landing	Santa Cruz	Santa Cruz	Centre- South	11.3	-0.7485	-90.4464	2	5	0.95
1233	Ayora	Oct	2002	21.7	Day	Landing	Santa Cruz	Santa Cruz	Centre- South	7.42	-0.71	-90.2128	1	4	0.75
1234	Ayora	Oct	2002	21.7	Day	Landing	Santa Cruz	Santa Cruz	Centre- South	11.3	-0.7485	-90.4464	2	4	0.2875
1235	Ayora	Oct	2002	21.7	Night	Observer	Santa Cruz	Santa Cruz	Centre- South	13	-0.75938	-90.4206	2	4	0.6
1236	Ayora	Oct	2002	21.7	Night	Observer	Santa Cruz	Santa Cruz	Centre- South	9.51	-0.77401	-90.3666	2	3	0.366667
1237	Ayora	Oct	2002	21.7	Night	Observer	Santa Cruz	Santa Cruz	Centre- South	13.8	-0.74488	-90.4506	2	6	0.875
1238	Ayora	Oct	2002	21.7	Night	Observer	Santa Cruz	Santa Cruz	Centre- South	13.8	-0.73569	-90.4594	2	7	0.878571
1239	Ayora	Oct	2002	21.7	Night	Observer	Santa Cruz	Santa Cruz	Centre- South	14.6	-0.7098	-90.5161	2	6	0.525
1240	Ayora	Oct	2002	21.7	Night	Landing	Santa Cruz	Santa Cruz	Centre- South	21.2	-0.654	-90.5493	1	5	1.8
1241	Ayora	Oct	2002	21.9	Night	Observer	Santiago	Santiago	Centre- South	59	-0.16382	-90.8239	2	8	1.8
1242	Ayora	Oct	2002	21.9	Night	Observer	Santiago	Santiago	Centre- South	39.9	-0.3674	-90.5841	2	4	0.170833
1243	Ayora	Oct	2002	21.9	Night	Observer	Santiago	Santiago	Centre- South	59	-0.21452	-90.8401	2	5	0.18
1244	Ayora	Oct	2002	21.9	Night	Observer	Santiago	Santiago	Centre- South	39.9	-0.3674	-90.5841	2	6	0.35
1245	Ayora	Oct	2002	21.9	Day	Observer	Santiago	Santiago	Centre- South	59	-0.16786	-90.8332	2	4	1.125
1246	Ayora	Oct	2002	21.9	Night	Observer	Santiago	Santiago	Centre- South	60.2	-0.1647	-90.8354	2	5	2.36
1247	Ayora	Oct	2002	21.9	Night	Observer	Santiago	Santiago	Centre- South	39.9	-0.36733	-90.5854	2	5	0.23
1248	Ayora	Oct	2002	21.9	Day	Observer	Santiago	Santiago	Centre- South	59	-0.17171	-90.8315	6	5	3.97333
1249	Ayora	Oct	2002	21.9	Night	Observer	Santiago	Santiago	Centre- South	60.2	-0.1647	-90.8354	6	5	2.35
1250	Ayora	Oct	2002	21.9	Night	Observer	Santiago	Santiago	Centre- South	39.9	-0.3674	-90.5841	6	5	0.773333
1251	Baquerizo	Nov	2002	23.3	Night	Observer	Pinzon	Pinzon	Centre- South	78.4	-0.6084	-90.4793	1	6	1.05667
1252	Baquerizo	Nov	2002	23.3	Night	Observer	Pinzon	Pinzon	Centre- South	78.4	-0.6084	-90.6882	2	5	2.045
1253	Baquerizo	Nov	2002	23.3	Night	Observer	Pinzon	Pinzon	Centre- South	78.4	-0.6084	-90.6882	1	5	1.18
1254	Baquerizo	Nov	2002	23.3	Night	Observer	Pinzon	Pinzon	Centre- South	78.4	-0.6084	-90.6882	1	5	0.54
1255	Baquerizo	Nov	2002	23.3	Night	Observer	Pinzon	Pinzon	Centre- South	78.4	-0.6084	-90.6882	1	5	0.54
1256	Baquerizo	Nov	2002	23.3	Night	Observer	Pinzon	Pinzon	Centre- South	78.4	-0.6084	-90.6882	1	5	1.54
1257	Baquerizo	Nov	2002	23.3	Night	Observer	Pinzon	Pinzon	Centre- South	78.4	-0.6084	-90.6882	1	6	0.6
1258	Baquerizo	Nov	2002	23.9	Day	Observer	San Cristobal N y O	San Cristobal	Centre- South	12.8	-0.75362	-89.4595	2	5	1.1
1259	Baquerizo	Nov	2002	23.9	Day	Landing	San Cristobal N y O	San Cristobal	Centre- South	12.8	-0.77633	-89.4757	2	5	0.544
1260	Baquerizo	Nov	2002	23.9	Night	Landing	San Cristobal N y O	San Cristobal	Centre- South	20.3	-0.688295	-89.3746	1	5	1.088
1261	Baquerizo	Nov	2002	23.9	Night	Landing	San Cristobal N y O	San Cristobal	Centre- South	22	-0.683	-89.3279	1	6	1.36
1262	Baquerizo	Nov	2002	23.9	Night	Landing	San Cristobal N y O	San Cristobal	Centre- South	12.8	-0.77633	-89.4757	1	7	1.49286
1263	Baquerizo	Nov	2002	23.9	Night	Landing	San Cristobal S y E	San Cristobal	Centre- South	9.5	-0.9557	-89.5197	1	7	0.21619
1264	Baquerizo	Nov	2002	23.9	Night	Landing	San Cristobal S y E	San Cristobal	Centre- South	5.41	-0.94788	-89.587	1	5	1.12
1265	Baquerizo	Nov	2002	23.9	Night	Landing	San Cristobal S y E	San Cristobal	Centre- South	11.2	-0.9497	-89.4963	1	5	1.212
1266	Baquerizo	Nov	2002	23.9	Night	Landing	San Cristobal S y E	San Cristobal	Centre- South	26.2	-0.8626	-89.367	2	4	1.57167
1267	Baquerizo	Nov	2002	23.9	Night	Landing	San Cristobal S y E	San Cristobal	Centre- South	6.1	-0.9409	-89.5906	2	5	0.909
1268	Baquerizo	Nov	2002	23.9	Day	Landing	San Cristobal S y E	San Cristobal	Centre- South	27.8	-0.842495	-89.3527	2	2	0.330833
1269	Baquerizo	Nov	2002	23.9	Night	Landing	San Cristobal S y E	San Cristobal	Centre- South	5.41	-0.94788	-89.587	1	5	2.544
1270	Baquerizo	Nov	2002	23.9	Night	Landing	San Cristobal S y E	San Cristobal	Centre- South	5.41	-0.94788	-89.587	1	3	2.11333
1271	Baquerizo	Nov	2002	23.9	Night	Landing	San Cristobal S y E	San Cristobal	Centre- South	5.41	-0.94788	-89.587	1	6	0.983333
1272	Baquerizo	Nov	2002	23.9	Night	Landing	San Cristobal S y E	San Cristobal	Centre- South	5.41	-0.94788	-89.587	2	6	0.454167
1273	Baquerizo	Nov	2002	23.9	Day	Landing	San Cristobal S y E	San Cristobal	Centre- South	27.8	-0.842495	-89.3527	2	6	0.294167
1274	Baquerizo	Nov	2002	23.9	Night	Landing	San Cristobal S y E	San Cristobal	Centre- South	5.41	-0.94788	-89.587	1	6	0.216667
1275	Baquerizo	Nov	2002	23.9	Night	Landing	San Cristobal S y E	San Cristobal	Centre- South	15.5	-0.93575	-89.4399	2	6	0.5475
1276	Baquerizo	Nov	2002	23.9	Night	Landing	San Cristobal S y E	San Cristobal	Centre- South	15.5	-0.93575	-89.4399	1	6	1.36333
1277	Baquerizo	Nov	2002	23.9	Night	Landing	San Cristobal S y E	San Cristobal	Centre- South	11.2	-0.9497	-89.4963	1	6	1.36333
1278	Baquerizo	Nov	2002	23.9	Night	Landing	San Cristobal S y E	San Cristobal	Centre- South	27.8	-0.842495	-89.3527	1	5	1.362
1279	Baquerizo	Nov	2002	23.9	Night	Landing	San Cristobal S y E	San Cristobal	Centre- South	9.5	-0.9557	-89.5197	1	6	0.605
1280	Baquerizo	Nov	2002	23.9	Night	Landing	San Cristobal S y E	San Cristobal	Centre- South	26	-0.71267	-89.2403	2	8	0.61875
1281	Baquerizo	Nov	2002	23.9	Night	Landing	San Cristobal S y E	San Cristobal	Centre- South	5.41	-0.94788	-89.587	1	6	1.66167
1282	Baquerizo	Nov	2002	23.9	Day	Landing	San Cristobal S y E	San Cristobal	Centre- South	11.2	-0.9497	-89.4963	2	6	1.08
1283	Baquerizo	Nov	2002	23.9	Night	Landing	San Cristobal S y E	San Cristobal	Centre- South	11.2	-0.9497	-89.4963	1	5	0.9
1284	Baquerizo	Nov	2002	23.9	Night	Landing	San Cristobal S y E	San Cristobal	Centre- South	36.9	-0.7556	-89.2644	1	18	1.59056
1285	Baquerizo	Nov	2002	23.9	Night	Landing	San Cristobal S y E	San Cristobal	Centre- South	15.5	-0.93575	-89.4399	1	6	1.13333
1286	Baquerizo	Nov	2002	23.9	Day	Landing	San Cristobal S y E	San Cristobal	Centre- South	26	-0.71267	-89.2403	1	5	1.994
1287	Baquerizo	Nov	2002	23.9	Day	Landing	San Cristobal S y E	San Cristobal	Centre- South	8.25	-0.95585	-89.5428	1	3	3.77667
1288	Baquerizo	Nov	2002	23.9	Day	Landing	San Cristobal S y E	San Cristobal	Centre- South	36.9	-0.7556	-89.2644	1	6	1.965
1289	Baquerizo	Nov	2002	23.9	Night	Landing	San Cristobal S y E	San Cristobal	Centre- South	11.2	-0.9497	-89.4963	1	6	1.66667
1290	Baquerizo	Nov	2002	23.9	Night	Landing	San Cristobal S y E	San Cristobal	Centre- South	36.9	-0.7556	-89.2644	1	18	1.38889
1291	Baquerizo	Nov	2002	23.9	Night	Landing	San Cristobal S y E	San Cristobal	Centre- South	11.2	-0.9497	-89.4963	2	2	0.7925
1292	Baquerizo	Nov	2002	23.9	Night	Landing	San Cristobal S y E	San Cristobal	Centre- South	9.5	-0.9557	-89.5197	1	5	3.272
1293	Baquerizo	Nov	2002	23.9	Night	Landing	San Cristobal S y E	San Cristobal	Centre- South	15.5	-0.93575	-89.4399	1	8	2.04
1294	Baquerizo	Nov	2002	23.9	Night	Landing	San Cristobal S y E	San Cristobal	Centre- South	11.2	-0.9497	-89.4963	1	7	1.42857
1295	Baquerizo	Nov	2002	23.9	Day	Landing	San Cristobal S y E	San Cristobal	Centre- South	27.8	-0.842495	-89.3527	1	8	2.4125
1296	Baquerizo	Nov	2002	23.9	Day	Landing	San Cristobal S y E	San Cristobal	Centre- South	27.8	-0.842495	-89.3527	2	7	0.68
1297	Baquerizo	Nov	2002	23.9	Day	Landing	San Cristobal S y E	San Cristobal	Centre- South	11.2	-0.9497	-89.4963	2	5	0.36
1298	Baquerizo	Nov	2002	23.9	Night	Landing	San Cristobal S y E	San Cristobal	Centre- South	5.41	-0.94788	-89.587	1	5	1.5418
1299	Baquerizo	Nov	2002	23.9	Night	Landing	San Cristobal S y E	San Cristobal	Centre- South	6.1	-0.9409	-89.5906	1	6	1.36333
1300	Baquerizo	Nov	2002	23.9	Night	Landing	San Cristobal S y E	San Cristobal	Centre- South	11.2	-0.9497	-89.4963	2	8	0.906875
1301	Baquerizo	Nov	2002	23.9	Night	Landing	San Cristobal S y E	San Cristobal	Centre- South	5.41	-0.94788	-89.587	1	7	1.61857
1302	Baquerizo	Nov	2002	23.9	Night	Landing	San Cristobal S y E	San Cristobal	Centre- South	5.41	-0.94788	-89.587	2	3	0.378333
1303	Baquerizo	Nov	2002	23.9	Night	Landing	San Cristobal S y E	San Cristobal	Centre- South	15.5	-0.93575	-89.4399	1	6	1.88833
1304	Baquerizo	Nov	2002	23.9	Night	Landing	San Cristobal S y E	San Cristobal	Centre- South	5.41	-0.94788	-89.587	1	6	1.81667
1305	Baquerizo	Nov	2002	23.9	Night	Landing	San Cristobal S y E	San Cristobal	Centre- South	27.8	-0.842495	-89.3527	1	6	2.72667
1306	Baquerizo	Nov	2002	23.9	Night	Landing	San Cristobal S y E	San Cristobal	Centre- South	36.9	-0.7556	-89.2644	1	8	2.38
1307	Baquerizo	Nov	2002	23.9	Day	Landing	San Cristobal S y E	San Cristobal	Centre- South	5.41	-0.94788	-89.587	2	6	0.605833
1308	Baquerizo	Nov	2002	23.9	Day	Landing	San Cristobal S y E	San Cristobal	Centre- South	11.2	-0.9497	-89.4963	1	6	2.49333
1309	Baquerizo	Nov	2002	23.9	Night	Landing	San Cristobal S y E	San Cristobal	Centre- South	36.9	-0.7556	-89.2644	1	6	3.93
1310	Ayora	Nov	2002	23.7	Day	Landing	Santa Cruz	Santa Cruz	Centre- South	5.62	-0.7354	-90.2324	1	3	0.466667
1311	Ayora	Nov	2002	23.7	Day	Landing	Santa Cruz	Santa Cruz	Centre- South	9.51	-0.75504	-90.4214	2	4	0.1625
1312	Ayora	Nov	2002	23.7	Day	Landing	Santa Cruz	Santa Cruz	Centre- South	9.51	-0.75504	-90.4214	1	5	0.46
1313	Ayora	Nov	2002	23.7	Day	Landing	Santa Cruz	Santa Cruz	Centre- South	14	-0.73309	-90.4665	1	6	0.533333
1314	Ayora	Nov	2002	23.7	Night	Landing	Santa Cruz	Santa Cruz	Centre- South	9.51	-0.75504	-90.4214	1	3	1.43333
1315	Ayora	Nov	2002	23.7	Night	Landing	Santa Cruz	Santa Cruz	Centre- South	13	-0.74564	-90.4489	1	16	0.65625
1316	Ayora	Nov	2002	23.7	Night	Landing	Santa Cruz	Santa Cruz	Centre- South	11.3	-0.7485	-90.4464	1	6	2.2
1317	Ayora	Nov	2002	23.7	Day	Landing	Santa Cruz	Santa Cruz	Centre- South	11.3	-0.7485	-90.4464	1	4	0.85
1318	Ayora	Nov	2002	23.7	Night	Landing	Santa Cruz	Santa Cruz	Centre- South	11.3	-0.7485	-90.4464	1	20	0.5
1319	Ayora	Nov	2002	23.7	Day	Landing	Santa Cruz	Santa Cruz	Centre- South	11.3	-0.7485	-90.4464	1	6	1.7
1320	Ayora	Nov	2002	23.7	Day	Landing	Santa Cruz	Santa Cruz	Centre- South	9.51	-0.75504	-90.4214	1	4	0.225
1321	Ayora	Nov	2002	23.7	Night	Landing	Santa Cruz	Santa Cruz	Centre- South	21.2	-0.654	-90.5493	2	6	1.44167
1322	Ayora	Nov	2002	23.7	Day	Landing	Santa Cruz	Santa Cruz	Centre- South	7.42	-0.71	-90.2128	1	5	0.08
1323	Ayora	Nov	2002	23.7	Night	Landing	Santa Cruz	Santa Cruz	Centre- South	21.2	-0.654	-90.5493	1	6	2.08333
1324	Ayora	Nov	2002	23.7	Day	Landing	Santa Cruz	Santa Cruz	Centre- South	9.51	-0.75504	-90.4214	1	3	2.26667
1325	Ayora	Nov	2002	23.7	Night	Landing	Santa Cruz	Santa Cruz	Centre- South	14.6	-0.7236	-90.4896	2	6	1.25
1326	Ayora	Nov	2002	23.7	Night	Landing	Santa Cruz	Santa Cruz	Centre- South	21.2	-0.654	-90.5493	1	4	3.175
1327	Ayora	Nov	2002	23.7	Day	Landing	Santa Cruz	Santa Cruz	Centre- South	17.4	-0.7097	-90.5209	1	3	0.466667
1328	Ayora	Nov	2002	23.7	Day	Landing	Santa Cruz	Santa Cruz	Centre- South	14.6	-0.7236	-90.4896	2	5	0.09
1329	Ayora	Nov	2002	23.7	Day	Landing	Santa Cruz	Santa Cruz	Centre- South	9.51	-0.75504	-90.4214	1	5	0.2
1330	Ayora	Nov	2002	23.7	Day	Landing	Santa Cruz	Santa Cruz	Centre- South	9.51	-0.75504	-90.4214	1	4	0.55
1331	Ayora	Nov	2002	23.7	Day	Landing	Santa Cruz	Santa Cruz	Centre- South	14	-0.73309	-90.4665	1	3	1.2
1332	Ayora	Nov	2002	23.7	Day	Landing	Santa Cruz	Santa Cruz	Centre- South	9.51	-0.75504	-90.4214	2	3	0.45
1333	Ayora	Nov	2002	23.7	Day	Landing	Santa Cruz	Santa Cruz	Centre- South	7.42	-0.71	-90.2128	1	5	0.26
1334	Ayora	Nov	2002	23.7	Day	Landing	Santa Cruz	Santa Cruz	Centre- South	9.51	-0.75504	-90.4214	1	4	1.35
1335	Ayora	Nov	2002	23.7	Day	Landing	Santa Cruz	Santa Cruz	Centre- South	7.42	-0.71	-90.2128	1	6	1.55
1336	Ayora	Nov	2002	23.7	Day	Landing	Santa Cruz	Santa Cruz	Centre- South	14	-0.73309	-90.4665	1	3	0.3
1337	Ayora	Nov	2002	23.7	Day	Landing	Santa Cruz	Santa Cruz	Centre- South	9.51	-0.75504	-90.4214	1	6	0.6
1338	Ayora	Nov	2002	23.7	Day	Landing	Santa Cruz	Santa Cruz	Centre- South	11.3	-0.7485	-90.4464	1	4	1.375
1339	Ayora	Nov	2002	23.7	Day	Landing	Santa Cruz	Santa Cruz	Centre- South	13	-0.74564	-90.4489	1	5	1
1340	Ayora	Nov	2002	23.7	Day	Landing	Santa Cruz	Santa Cruz	Centre- South	9.51	-0.75504	-90.4214	1	5	1.46
1341	Ayora	Nov	2002	23.7	Night	Landing	Santa Cruz	Santa Cruz	Centre- South	14.6	-0.7236	-90.4896	1	3.5	1.42857
1342	Ayora	Nov	2002	23.7	Night	Landing	Santa Cruz	Santa Cruz	Centre- South	11.3	-0.7485	-90.4464	1	3	2
1343	Ayora	Nov	2002	23.7	Night	Landing	Santa Cruz	Santa Cruz	Centre- South	14	-0.73309	-90.4665	2	16	0.303125
1344	Ayora	Nov	2002	23.7	Night	Landing	Santa Cruz	Santa Cruz	Centre- South	14	-0.73309	-90.4665	1	5	1.22
1345	Ayora	Nov	2002	23.7	Day	Landing	Santa Cruz	Santa Cruz	Centre- South	14	-0.73309	-90.4665	2	5	0.135
1346	Ayora	Nov	2002	23.7	Day	Landing	Santa Cruz	Santa Cruz	Centre- South	9.51	-0.75504	-90.4214	2	4	0.275
1347	Ayora	Nov	2002	23.7	Night	Landing	Santa Cruz	Santa Cruz	Centre- South	11.3	-0.7485	-90.4464	1	4	2.95
1348	Ayora	Nov	2002	23.7	Night	Landing	Santa Cruz	Santa Cruz	Centre- South	11.3	-0.7485	-90.4464	2	7	0.292857
1349	Ayora	Nov	2002	23.7	Night	Landing	Santa Cruz	Santa Cruz	Centre- South	14.6	-0.7236	-90.4896	1	7	1.68571
1350	Ayora	Nov	2002	23.7	Day	Landing	Santa Cruz	Santa Cruz	Centre- South	7.42	-0.71	-90.2128	1	7	0.485714
1351	Ayora	Nov	2002	23.7	Day	Landing	Santa Cruz	Santa Cruz	Centre- South	14	-0.73309	-90.4665	1	5	0.32
1352	Ayora	Nov	2002	23.7	Night	Landing	Santa Cruz	Santa Cruz	Centre- South	11.3	-0.7485	-90.4464	1	4	3.3
1353	Ayora	Nov	2002	23.7	Day	Landing	Santa Cruz	Santa Cruz	Centre- South	13	-0.74564	-90.4489	1	5	0.14
1354	Ayora	Nov	2002	23.7	Night	Landing	Santa Cruz	Santa Cruz	Centre- South	13	-0.74564	-90.4489	1	5	3.2
1355	Ayora	Nov	2002	23.7	Day	Landing	Santa Cruz	Santa Cruz	Centre- South	14.6	-0.7236	-90.4896	1	5	1.1
1356	Ayora	Nov	2002	23.7	Day	Landing	Santa Cruz	Santa Cruz	Centre- South	11.3	-0.7485	-90.4464	1	6	0.666667
1357	Ayora	Nov	2002	23.7	Day	Landing	Santa Cruz	Santa Cruz	Centre- South	9.51	-0.75504	-90.4214	1	3	0.833333
1358	Ayora	Nov	2002	23.7	Day	Landing	Santa Cruz	Santa Cruz	Centre- South	13	-0.74564	-90.4489	2	4	0.625
1359	Ayora	Nov	2002	23.7	Night	Landing	Santa Cruz	Santa Cruz	Centre- South	14.6	-0.7236	-90.4896	1	7	0.971429
1360	Ayora	Nov	2002	23.7	Day	Landing	Santa Cruz	Santa Cruz	Centre- South	7.42	-0.71	-90.2128	1	5	0.44
1361	Ayora	Nov	2002	23.7	Night	Landing	Santa Cruz	Santa Cruz	Centre- South	13	-0.74564	-90.4489	2	4	1.25
1362	Ayora	Nov	2002	23.7	Night	Observer	Santa Cruz	Santa Cruz	Centre- South	14.6	-0.72811	-90.4669	2	7	0.478571
1363	Ayora	Nov	2002	23.7	Night	Observer	Santa Cruz	Santa Cruz	Centre- South	21.2	-0.69405	-90.5377	2	6	0.316667
1364	Ayora	Nov	2002	23.7	Night	Observer	Santa Cruz	Santa Cruz	Centre- South	13	-0.75996	-90.4202	2	6.5	0.407692
1365	Ayora	Nov	2002	23.7	Night	Observer	Santa Cruz	Santa Cruz	Centre- South	13.8	-0.74518	-90.4517	1	6	0.516667
1366	Ayora	Nov	2002	23.7	Day	Landing	Santa Cruz	Santa Cruz	Centre- South	9.51	-0.75504	-90.4214	1	5	0.28
1367	Ayora	Nov	2002	23.7	Day	Landing	Santa Cruz	Santa Cruz	Centre- South	5.62	-0.7354	-90.2324	2	2	1.025
1368	Ayora	Nov	2002	23.7	Night	Landing	Santa Cruz	Santa Cruz	Centre- South	21.2	-0.654	-90.5493	1	12	2.08333
1369	Ayora	Nov	2002	23.7	Night	Landing	Santa Cruz	Santa Cruz	Centre- South	21.2	-0.654	-90.5493	1	5	3.6
1370	Ayora	Nov	2002	23.7	Night	Landing	Santa Cruz	Santa Cruz	Centre- South	14	-0.73309	-90.4665	2	3	0.583333
1371	Ayora	Nov	2002	23.7	Night	Landing	Santa Cruz	Santa Cruz	Centre- South	7.42	-0.71	-90.2128	1	14	1.64286
1372	Ayora	Nov	2002	23.7	Night	Landing	Santa Cruz	Santa Cruz	Centre- South	14.6	-0.7236	-90.4896	2	8	1.1875
1373	Ayora	Nov	2002	23.7	Night	Landing	Santa Cruz	Santa Cruz	Centre- South	14.6	-0.7236	-90.4896	1	5	2.9
1374	Ayora	Nov	2002	23.7	Night	Landing	Santa Cruz	Santa Cruz	Centre- South	21.2	-0.654	-90.5493	1	8	2.5625
1375	Ayora	Nov	2002	23.7	Night	Landing	Santa Cruz	Santa Cruz	Centre- South	26.5	-0.57354	-90.5375	1	24	1.10417
1376	Ayora	Nov	2002	23.7	Night	Landing	Santa Cruz	Santa Cruz	Centre- South	13	-0.74564	-90.4489	2	7	1.42857
1377	Ayora	Nov	2002	23.7	Day	Landing	Santa Cruz	Santa Cruz	Centre- South	11.3	-0.7485	-90.4464	1	5	1
1378	Ayora	Nov	2002	23.7	Night	Landing	Santa Cruz	Santa Cruz	Centre- South	11.3	-0.7485	-90.4464	1	3	0.833333
1379	Ayora	Nov	2002	23.7	Day	Landing	Santa Cruz	Santa Cruz	Centre- South	14	-0.73309	-90.4665	2	4	0.875
1380	Ayora	Nov	2002	23.7	Night	Landing	Santa Cruz	Santa Cruz	Centre- South	14.6	-0.7236	-90.4896	1	20	1.525
1381	Ayora	Nov	2002	23.7	Night	Landing	Santa Cruz	Santa Cruz	Centre- South	11.3	-0.7485	-90.4464	1	6	0.916667
1382	Ayora	Nov	2002	23.7	Day	Landing	Santa Cruz	Santa Cruz	Centre- South	14	-0.73309	-90.4665	1	3	0.0733333
1383	Ayora	Nov	2002	23.7	Night	Landing	Santa Cruz	Santa Cruz	Centre- South	21.2	-0.654	-90.5493	2	24	0.64375
1384	Ayora	Nov	2002	23.7	Night	Landing	Santa Cruz	Santa Cruz	Centre- South	11.3	-0.7485	-90.4464	2	5	0.7
1385	Ayora	Nov	2002	23.7	Day	Observer	Santa Cruz	Santa Cruz	Centre- South	26.4	-0.48055	-90.2503	2	2	0.375
1386	Ayora	Nov	2002	23.7	Night	Observer	Santa Cruz	Santa Cruz	Centre- South	26.4	-0.47931	-90.252	2	3	0.5
1387	Ayora	Nov	2002	23.7	Night	Landing	Santa Cruz	Santa Cruz	Centre- South	26.5	-0.57354	-90.5375	1	12	1.49167
1388	Ayora	Nov	2002	23.7	Night	Landing	Santa Cruz	Santa Cruz	Centre- South	21.2	-0.654	-90.5493	1	4	5.625
1389	Ayora	Nov	2002	23.7	Day	Landing	Santa Cruz	Santa Cruz	Centre- South	11.3	-0.7485	-90.4464	1	3	0.3
1390	Ayora	Nov	2002	23.7	Day	Landing	Santa Cruz	Santa Cruz	Centre- South	9.51	-0.75504	-90.4214	1	4	0.775
1391	Ayora	Nov	2002	23.7	Day	Landing	Santa Cruz	Santa Cruz	Centre- South	7.42	-0.71	-90.2128	1	4	0.45
1392	Ayora	Nov	2002	23.7	Night	Landing	Santa Cruz	Santa Cruz	Centre- South	14.6	-0.7236	-90.4896	1	4	1.75
1393	Ayora	Nov	2002	23.7	Night	Landing	Santa Cruz	Santa Cruz	Centre- South	11.3	-0.7485	-90.4464	2	12	0.625
1394	Ayora	Nov	2002	23.7	Day	Landing	Santa Cruz	Santa Cruz	Centre- South	7.42	-0.71	-90.2128	1	4	1.625
1395	Ayora	Nov	2002	23.7	Night	Landing	Santa Cruz	Santa Cruz	Centre- South	11.3	-0.7485	-90.4464	1	6	0.916667
1396	Ayora	Nov	2002	23.7	Night	Landing	Santa Cruz	Santa Cruz	Centre- South	11.3	-0.7485	-90.4464	1	20	1.005
1397	Ayora	Nov	2002	23.7	Day	Landing	Santa Cruz	Santa Cruz	Centre- South	11.3	-0.7485	-90.4464	1	6	1.66667
1398	Ayora	Nov	2002	23.7	Night	Observer	Santa Cruz	Santa Cruz	Centre- South	9.51	-0.77095	-90.3804	2	6	0.716667
1399	Ayora	Nov	2002	23.7	Night	Observer	Santa Cruz	Santa Cruz	Centre- South	11.3	-0.77213	-90.4039	1	2.5	3.08
1400	Ayora	Nov	2002	23.7	Night	Observer	Santa Cruz	Santa Cruz	Centre- South	13	-0.74672	-90.4457	2	5	1.24
1401	Ayora	Nov	2002	23.7	Night	Observer	Santa Cruz	Santa Cruz	Centre- South	13	-0.75404	-90.4354	2	5.5	1.98182
1402	Ayora	Nov	2002	23.7	Day	Observer	Santa Cruz	Santa Cruz	Centre- South	13.8	-0.72936	-90.4649	2	4	1.4125
1403	Ayora	Nov	2002	23.7	Night	Observer	Santa Cruz	Santa Cruz	Centre- South	13	-0.75733	-90.426	2	4	0.25
1404	Ayora	Nov	2002	23.7	Night	Observer	Santa Cruz	Santa Cruz	Centre- South	11.3	-0.76562	-90.4139	2	2	0.3
1405	Ayora	Nov	2002	23.7	Night	Landing	Santa Cruz	Santa Cruz	Centre- South	26.5	-0.57354	-90.5375	1	8	1.425
1406	Ayora	Nov	2002	23.7	Night	Landing	Santa Cruz	Santa Cruz	Centre- South	21.2	-0.654	-90.5493	4	35	0.55
1407	Ayora	Nov	2002	23.7	Night	Landing	Santa Cruz	Santa Cruz	Centre- South	26.5	-0.57354	-90.5375	4	7	0.164286
1408	Ayora	Nov	2002	23.7	Night	Landing	Santa Cruz	Santa Cruz	Centre- South	26.5	-0.57354	-90.5375	4	13	0.219231
1409	Ayora	Nov	2002	23.7	Day	Observer	Santa Cruz	Santa Cruz	Centre- South	26.4	-0.47931	-90.252	6	5	0.15
1410	Baquerizo	Nov	2002	23.7	Night	Observer	Santa Cruz	Santa Cruz	Centre- South	70	-0.6775	-90.5397	2	6	0.841667
1411	Baquerizo	Nov	2002	23.7	Night	Observer	Santa Cruz	Santa Cruz	Centre- South	70	-0.654	-90.5493	2	6	0.416667
1412	Baquerizo	Nov	2002	23.7	Night	Observer	Santa Cruz	Santa Cruz	Centre- South	70	-0.654	-90.5493	2	6	0.716667
1413	Baquerizo	Nov	2002	23.7	Night	Observer	Santa Cruz	Santa Cruz	Centre- South	63.2	-0.7236	-90.4896	1	8	1.25
1414	Baquerizo	Nov	2002	23.7	Night	Observer	Santa Cruz	Santa Cruz	Centre- South	63.2	-0.7236	-90.4896	1	6	1.66667
1415	Baquerizo	Nov	2002	23.7	Night	Observer	Santa Cruz	Santa Cruz	Centre- South	70	-0.654	-90.5493	1	5	1.36
1416	Baquerizo	Nov	2002	23.7	Night	Observer	Santa Cruz	Santa Cruz	Centre- South	70	-0.654	-90.5493	1	5	0.9
1417	Baquerizo	Nov	2002	23.7	Night	Observer	Santa Cruz	Santa Cruz	Centre- South	63.2	-0.7236	-90.4896	2	5	0.9
1418	Baquerizo	Nov	2002	23.7	Night	Observer	Santa Cruz	Santa Cruz	Centre- South	70	-0.654	-90.5493	2	6	1.66667
1419	Baquerizo	Nov	2002	23.7	Night	Observer	Santa Cruz	Santa Cruz	Centre- South	63.2	-0.7236	-90.4896	2	5	1.04
1420	Baquerizo	Nov	2002	23.7	Night	Observer	Santa Cruz	Santa Cruz	Centre- South	70	-0.654	-90.5493	2	5	1.54
1421	Baquerizo	Nov	2002	23.7	Night	Observer	Santa Cruz	Santa Cruz	Centre- South	70	-0.654	-90.5493	1	5	0.818
1422	Baquerizo	Nov	2002	23.7	Night	Observer	Santa Cruz	Santa Cruz	Centre- South	63.2	-0.7236	-90.4896	1	4	2.9475
1423	Baquerizo	Nov	2002	23.7	Night	Observer	Santa Cruz	Santa Cruz	Centre- South	63.2	-0.6775	-90.5397	1	5	3.178
1424	Baquerizo	Nov	2002	23.5	Night	Landing	Santa Fe	Santa Fe	Centre- South	30.2	-0.8404	-90.0434	2	8	1.76125
1425	Baquerizo	Nov	2002	23.5	Night	Observer	Santa Fe	Santa Fe	Centre- South	30.2	-0.80434	-90.0387	1	3	1.37778
1426	Ayora	Nov	2002	24	Night	Landing	Santiago	Santiago	Centre- South	39.9	-0.3674	-90.5841	2	4	2.1875
1427	Ayora	Nov	2002	24	Night	Observer	Santiago	Santiago	Centre- South	39.9	-0.34912	-90.5645	1	2	0.25
1428	Ayora	Nov	2002	24	Night	Observer	Santiago	Santiago	Centre- South	39.9	-0.34724	-90.5666	2	4	0.3125
1429	Ayora	Nov	2002	24	Night	Landing	Santiago	Santiago	Centre- South	39.9	-0.3674	-90.5841	1	24	2.45833
1430	Ayora	Nov	2002	24	Night	Landing	Santiago	Santiago	Centre- South	39.9	-0.3674	-90.5841	4	14	0.164286
1431	Ayora	Nov	2002	24	Night	Observer	Santiago	Santiago	Centre- South	39.9	-0.3674	-90.5841	6	4	0.5
1432	Ayora	Nov	2002	24	Day	Landing	Santiago	Santiago	Centre- South	45.8	-0.1917	-90.6472	6	5	0.333333
1433	Ayora	Nov	2002	24	Day	Landing	Santiago	Santiago	Centre- South	49.9	-0.23399	-90.5813	6	6	0.5
1434	Ayora	Nov	2002	24	Day	Landing	Santiago	Santiago	Centre- South	39.9	-0.3674	-90.5841	6	7	0.404762
1435	Baquerizo	Nov	2002	24	Night	Observer	Santiago	Santiago	Centre- South	103	-0.1647	-90.8354	2	7	0.614286
1436	Baquerizo	Nov	2002	24	Night	Observer	Santiago	Santiago	Centre- South	106	-0.28955	-90.927	2	7	0.485714
1437	Baquerizo	Nov	2002	24	Night	Observer	Santiago	Santiago	Centre- South	88.7	-0.3518	-90.6716	1	6	2.26667
1438	Baquerizo	Nov	2002	24	Night	Observer	Santiago	Santiago	Centre- South	103	-0.1647	-90.8354	2	5	0.59
1439	Baquerizo	Nov	2002	24	Night	Observer	Santiago	Santiago	Centre- South	88.7	-0.3518	-90.6716	1	6	1.89333
1440	Baquerizo	Nov	2002	24	Night	Observer	Santiago	Santiago	Centre- South	106	-0.30392	-90.8343	1	4	4.435
1441	Baquerizo	Nov	2002	24	Night	Observer	Santiago	Santiago	Centre- South	106	-0.28955	-90.927	1	6	0.15
1442	Baquerizo	Dec	2002	24.4	Night	Landing	San Cristobal N y O	San Cristobal	Centre- South	12.8	-0.77633	-89.4757	1	6	3.77833
1443	Baquerizo	Dec	2002	24.4	Night	Landing	San Cristobal N y O	San Cristobal	Centre- South	23.6	-1.1528	-89.8323	2	10	0.2725
1444	Baquerizo	Dec	2002	24.4	Night	Observer	San Cristobal N y O	San Cristobal	Centre- South	5.5	-0.83806	-89.5634	1	3	0.6
1445	Baquerizo	Dec	2002	24.4	Night	Landing	San Cristobal N y O	San Cristobal	Centre- South	26	-0.7	-89.2759	2	7	0.441429
1446	Baquerizo	Dec	2002	24.5	Night	Landing	San Cristobal S y E	San Cristobal	Centre- South	11.2	-0.9497	-89.4963	1	4	1.1325
1447	Baquerizo	Dec	2002	24.5	Night	Landing	San Cristobal S y E	San Cristobal	Centre- South	6.1	-0.9409	-89.5906	1	4	1.8125
1448	Baquerizo	Dec	2002	24.5	Night	Observer	San Cristobal S y E	San Cristobal	Centre- South	26.2	-0.85437	-89.369	1	4	0.795
1449	Baquerizo	Dec	2002	24.5	Night	Observer	San Cristobal S y E	San Cristobal	Centre- South	27.8	-0.7863	-89.2972	2	3	0.53
1450	Baquerizo	Dec	2002	24.5	Day	Landing	San Cristobal S y E	San Cristobal	Centre- South	26.2	-0.8626	-89.367	1	5	1.18
1451	Baquerizo	Dec	2002	24.5	Day	Landing	San Cristobal S y E	San Cristobal	Centre- South	26.2	-0.8626	-89.367	1	5	0.272
1452	Baquerizo	Dec	2002	24.5	Night	Observer	San Cristobal S y E	San Cristobal	Centre- South	26.2	-0.87545	-89.3751	1	5	0.908
1453	Baquerizo	Dec	2002	24.5	Night	Observer	San Cristobal S y E	San Cristobal	Centre- South	26.2	-0.83621	-89.3431	2	4	0.45375
1454	Baquerizo	Dec	2002	24.5	Night	Landing	San Cristobal S y E	San Cristobal	Centre- South	9.5	-0.9557	-89.5197	1	5	2.272
1455	Baquerizo	Dec	2002	24.5	Night	Landing	San Cristobal S y E	San Cristobal	Centre- South	6.1	-0.9409	-89.5906	2	6	0.605833
1456	Baquerizo	Dec	2002	24.5	Night	Observer	San Cristobal S y E	San Cristobal	Centre- South	17.4	-0.9254	-89.4113	2	6	0.454167
1457	Baquerizo	Dec	2002	24.5	Day	Landing	San Cristobal S y E	San Cristobal	Centre- South	27.8	-0.842495	-89.3527	1	6	0.833333
1458	Baquerizo	Dec	2002	24.5	Day	Landing	San Cristobal S y E	San Cristobal	Centre- South	17.4	-0.9254	-89.4113	1	6	0.075
1459	Baquerizo	Dec	2002	24.5	Day	Landing	San Cristobal S y E	San Cristobal	Centre- South	27.8	-0.842495	-89.3527	2	10	0.34
1460	Baquerizo	Dec	2002	24.5	Night	Landing	San Cristobal S y E	San Cristobal	Centre- South	5.41	-0.94788	-89.587	1	8	1.21875
1461	Baquerizo	Dec	2002	24.5	Day	Landing	San Cristobal S y E	San Cristobal	Centre- South	27.8	-0.842495	-89.3527	2	6	0.416667
1462	Baquerizo	Dec	2002	24.5	Night	Landing	San Cristobal S y E	San Cristobal	Centre- South	5.41	-0.94788	-89.587	1	6	0.603333
1463	Baquerizo	Dec	2002	24.5	Night	Landing	San Cristobal S y E	San Cristobal	Centre- South	11.2	-0.9497	-89.4963	2	6	1.875
1464	Baquerizo	Dec	2002	24.5	Night	Landing	San Cristobal S y E	San Cristobal	Centre- South	15.5	-0.93575	-89.4399	2	6	2.2725
1465	Baquerizo	Dec	2002	24.5	Night	Landing	San Cristobal S y E	San Cristobal	Centre- South	11.2	-0.9497	-89.4963	2	8	1.02
1466	Baquerizo	Dec	2002	24.5	Day	Observer	San Cristobal S y E	San Cristobal	Centre- South	26.2	-0.8626	-89.367	1	6	0.965
1467	Baquerizo	Dec	2002	24.5	Day	Landing	San Cristobal S y E	San Cristobal	Centre- South	36.9	-0.7556	-89.2644	2	6	0.453333
1468	Baquerizo	Dec	2002	24.5	Day	Landing	San Cristobal S y E	San Cristobal	Centre- South	5.41	-0.94788	-89.587	1	7	1.85143
1469	Baquerizo	Dec	2002	24.5	Night	Landing	San Cristobal S y E	San Cristobal	Centre- South	36.9	-0.7556	-89.2644	1	8	1.41625
1470	Baquerizo	Dec	2002	24.5	Night	Landing	San Cristobal S y E	San Cristobal	Centre- South	11.2	-0.9497	-89.4963	1	6	1.055
1471	Baquerizo	Dec	2002	24.5	Night	Landing	San Cristobal S y E	San Cristobal	Centre- South	11.2	-0.9497	-89.4963	2	6	0.906667
1472	Baquerizo	Dec	2002	24.5	Night	Landing	San Cristobal S y E	San Cristobal	Centre- South	11.2	-0.9497	-89.4963	2	6	0.188333
1473	Baquerizo	Dec	2002	24.5	Night	Landing	San Cristobal S y E	San Cristobal	Centre- South	11.2	-0.9497	-89.4963	2	5	1.36
1474	Baquerizo	Dec	2002	24.5	Night	Landing	San Cristobal S y E	San Cristobal	Centre- South	5.41	-0.94788	-89.587	2	15	0.423
1475	Baquerizo	Dec	2002	24.5	Day	Landing	San Cristobal S y E	San Cristobal	Centre- South	11.2	-0.9497	-89.4963	1	6	0.453333
1476	Baquerizo	Dec	2002	24.5	Night	Landing	San Cristobal S y E	San Cristobal	Centre- South	5.41	-0.94788	-89.587	1	8	1.8125
1477	Baquerizo	Dec	2002	24.5	Night	Landing	San Cristobal S y E	San Cristobal	Centre- South	5.41	-0.94788	-89.587	2	8	0.793125
1478	Baquerizo	Dec	2002	24.5	Night	Landing	San Cristobal S y E	San Cristobal	Centre- South	6.1	-0.9409	-89.5906	2	8	0.99375
1479	Baquerizo	Dec	2002	24.5	Night	Landing	San Cristobal S y E	San Cristobal	Centre- South	5.41	-0.94788	-89.587	2	6	0.5675
1480	Baquerizo	Dec	2002	24.5	Day	Landing	San Cristobal S y E	San Cristobal	Centre- South	11.2	-0.9497	-89.4963	1	7	1.25857
1481	Baquerizo	Dec	2002	24.5	Night	Observer	San Cristobal S y E	San Cristobal	Centre- South	27.8	-0.83141	-89.3504	1	3	0.453333
1482	Baquerizo	Dec	2002	24.5	Day	Landing	San Cristobal S y E	San Cristobal	Centre- South	26	-0.71267	-89.2403	1	5	0.454
1483	Baquerizo	Dec	2002	24.5	Night	Landing	San Cristobal S y E	San Cristobal	Centre- South	5.41	-0.94788	-89.587	2	6	0.5675
1484	Baquerizo	Dec	2002	24.5	Night	Landing	San Cristobal S y E	San Cristobal	Centre- South	27.8	-0.842495	-89.3527	2	6	1.43917
1485	Baquerizo	Dec	2002	24.5	Day	Landing	San Cristobal S y E	San Cristobal	Centre- South	6.1	-0.9409	-89.5906	2	6	0.586667
1486	Baquerizo	Dec	2002	24.5	Day	Landing	San Cristobal S y E	San Cristobal	Centre- South	11.2	-0.9497	-89.4963	1	8	1.25
1487	Baquerizo	Dec	2002	24.5	Night	Landing	San Cristobal S y E	San Cristobal	Centre- South	36.9	-0.7556	-89.2644	1	6	1.89333
1488	Baquerizo	Dec	2002	24.5	Night	Landing	San Cristobal S y E	San Cristobal	Centre- South	11.2	-0.9497	-89.4963	1	8	1.42
1489	Baquerizo	Dec	2002	24.5	Night	Observer	San Cristobal S y E	San Cristobal	Centre- South	27.8	-0.84804	-89.3637	1	2	0.45
1490	Baquerizo	Dec	2002	24.5	Night	Landing	San Cristobal S y E	San Cristobal	Centre- South	11.2	-0.9497	-89.4963	2	5	0.5
1491	Baquerizo	Dec	2002	24.5	Day	Landing	San Cristobal S y E	San Cristobal	Centre- South	27.8	-0.842495	-89.3527	1	6	2.045
1492	Baquerizo	Dec	2002	24.5	Day	Landing	San Cristobal S y E	San Cristobal	Centre- South	27.8	-0.842495	-89.3527	2	8	0.970625
1493	Baquerizo	Dec	2002	24.5	Day	Landing	San Cristobal S y E	San Cristobal	Centre- South	11.2	-0.9497	-89.4963	2	6	0.354167
1494	Baquerizo	Dec	2002	24.5	Day	Landing	San Cristobal S y E	San Cristobal	Centre- South	11.2	-0.9497	-89.4963	1	6	1.25
1495	Baquerizo	Dec	2002	24.5	Day	Landing	San Cristobal S y E	San Cristobal	Centre- South	11.2	-0.9497	-89.4963	2	6	0.416667
1496	Baquerizo	Dec	2002	24.5	Night	Landing	San Cristobal S y E	San Cristobal	Centre- South	11.2	-0.9497	-89.4963	1	4	0.75
1497	Baquerizo	Dec	2002	24.5	Night	Landing	San Cristobal S y E	San Cristobal	Centre- South	27.8	-0.842495	-89.3527	2	20	0.9545
1498	Ayora	Dec	2002	24.4	Night	Observer	Santa Cruz	Santa Cruz	Centre- South	1.13	-0.77056	-90.3189	1	4	1.25
1499	Ayora	Dec	2002	24.4	Night	Landing	Santa Cruz	Santa Cruz	Centre- South	14.6	-0.7236	-90.4896	2	12	0.304167
1500	Ayora	Dec	2002	24.4	Day	Landing	Santa Cruz	Santa Cruz	Centre- South	7.42	-0.71	-90.2128	2	7	0.0642857
1501	Ayora	Dec	2002	24.4	Night	Landing	Santa Cruz	Santa Cruz	Centre- South	14.6	-0.7236	-90.4896	1	18	0.755556
1502	Ayora	Dec	2002	24.4	Night	Landing	Santa Cruz	Santa Cruz	Centre- South	21.2	-0.654	-90.5493	1	6	0.45
1503	Ayora	Dec	2002	24.4	Night	Landing	Santa Cruz	Santa Cruz	Centre- South	26.5	-0.57354	-90.5375	2	15	0.683333
1504	Ayora	Dec	2002	24.4	Day	Landing	Santa Cruz	Santa Cruz	Centre- South	11.3	-0.7485	-90.4464	2	4	0.8125
1505	Ayora	Dec	2002	24.4	Day	Landing	Santa Cruz	Santa Cruz	Centre- South	9.51	-0.75504	-90.4214	2	5	0.34
1506	Ayora	Dec	2002	24.4	Day	Landing	Santa Cruz	Santa Cruz	Centre- South	9.51	-0.75504	-90.4214	2	4	0.1125
1507	Ayora	Dec	2002	24.4	Day	Landing	Santa Cruz	Santa Cruz	Centre- South	9.51	-0.75504	-90.4214	2	5	0.36
1508	Ayora	Dec	2002	24.4	Day	Landing	Santa Cruz	Santa Cruz	Centre- South	14	-0.73309	-90.4665	2	5	0.05
1509	Ayora	Dec	2002	24.4	Night	Landing	Santa Cruz	Santa Cruz	Centre- South	11.3	-0.7485	-90.4464	1	12	0.833333
1510	Ayora	Dec	2002	24.4	Night	Landing	Santa Cruz	Santa Cruz	Centre- South	9.51	-0.75504	-90.4214	1	2	1.5
1511	Ayora	Dec	2002	24.4	Night	Landing	Santa Cruz	Santa Cruz	Centre- South	9.51	-0.75504	-90.4214	1	3	1.5
1512	Ayora	Dec	2002	24.4	Day	Landing	Santa Cruz	Santa Cruz	Centre- South	11.3	-0.7485	-90.4464	1	6	0.383333
1513	Ayora	Dec	2002	24.4	Day	Landing	Santa Cruz	Santa Cruz	Centre- South	11.3	-0.7485	-90.4464	1	6	0.0833333
1514	Ayora	Dec	2002	24.4	Day	Landing	Santa Cruz	Santa Cruz	Centre- South	7.42	-0.71	-90.2128	1	6	0.233333
1515	Ayora	Dec	2002	24.4	Day	Landing	Santa Cruz	Santa Cruz	Centre- South	11.3	-0.7485	-90.4464	1	6	0.266667
1516	Ayora	Dec	2002	24.4	Day	Landing	Santa Cruz	Santa Cruz	Centre- South	9.51	-0.75504	-90.4214	1	5	0.28
1517	Ayora	Dec	2002	24.4	Day	Landing	Santa Cruz	Santa Cruz	Centre- South	9.51	-0.75504	-90.4214	1	5	0.22
1518	Ayora	Dec	2002	24.4	Day	Landing	Santa Cruz	Santa Cruz	Centre- South	7.42	-0.71	-90.2128	1	4	0.05
1519	Ayora	Dec	2002	24.4	Day	Landing	Santa Cruz	Santa Cruz	Centre- South	9.51	-0.75504	-90.4214	1	5	0.14
1520	Ayora	Dec	2002	24.4	Day	Landing	Santa Cruz	Santa Cruz	Centre- South	7.42	-0.71	-90.2128	1	4	0.45
1521	Ayora	Dec	2002	24.4	Day	Landing	Santa Cruz	Santa Cruz	Centre- South	7.42	-0.71	-90.2128	1	4	0.6825
1522	Ayora	Dec	2002	24.4	Night	Landing	Santa Cruz	Santa Cruz	Centre- South	14	-0.73309	-90.4665	1	16	0.7375
1523	Ayora	Dec	2002	24.4	Day	Landing	Santa Cruz	Santa Cruz	Centre- South	7.42	-0.71	-90.2128	1	4.5	0.908889
1524	Ayora	Dec	2002	24.4	Night	Landing	Santa Cruz	Santa Cruz	Centre- South	21.2	-0.654	-90.5493	1	10	4.045
1525	Ayora	Dec	2002	24.4	Night	Landing	Santa Cruz	Santa Cruz	Centre- South	21.2	-0.654	-90.5493	2	11	1.79773
1526	Ayora	Dec	2002	24.4	Day	Landing	Santa Cruz	Santa Cruz	Centre- South	14	-0.73309	-90.4665	1	4	1.0225
1527	Ayora	Dec	2002	24.4	Day	Landing	Santa Cruz	Santa Cruz	Centre- South	14	-0.73309	-90.4665	1	5	0.728
1528	Ayora	Dec	2002	24.4	Night	Landing	Santa Cruz	Santa Cruz	Centre- South	11.3	-0.7485	-90.4464	1	12	2.235
1529	Ayora	Dec	2002	24.4	Night	Landing	Santa Cruz	Santa Cruz	Centre- South	11.3	-0.7485	-90.4464	1	25	0.76
1530	Ayora	Dec	2002	24.4	Night	Landing	Santa Cruz	Santa Cruz	Centre- South	11.3	-0.7485	-90.4464	2	14	0.542857
1531	Ayora	Dec	2002	24.4	Day	Landing	Santa Cruz	Santa Cruz	Centre- South	7.42	-0.71	-90.2128	1	5	0.3
1532	Ayora	Dec	2002	24.4	Night	Landing	Santa Cruz	Santa Cruz	Centre- South	7.42	-0.71	-90.2128	1	5	0.2
1533	Ayora	Dec	2002	24.4	Day	Landing	Santa Cruz	Santa Cruz	Centre- South	7.42	-0.71	-90.2128	1	4.5	0.504444
1534	Ayora	Dec	2002	24.4	Day	Landing	Santa Cruz	Santa Cruz	Centre- South	14	-0.73309	-90.4665	2	33	0.557879
1535	Ayora	Dec	2002	24.4	Night	Landing	Santa Cruz	Santa Cruz	Centre- South	24.6	-0.4984	-90.2414	1	8	1.1375
1536	Ayora	Dec	2002	24.4	Day	Landing	Santa Cruz	Santa Cruz	Centre- South	11.3	-0.7485	-90.4464	1	6	0.583333
1537	Ayora	Dec	2002	24.4	Day	Landing	Santa Cruz	Santa Cruz	Centre- South	11.3	-0.7485	-90.4464	2	5	0.45
1538	Ayora	Dec	2002	24.4	Night	Landing	Santa Cruz	Santa Cruz	Centre- South	21.2	-0.654	-90.5493	2	25	0.62
1539	Ayora	Dec	2002	24.4	Day	Landing	Santa Cruz	Santa Cruz	Centre- South	21.2	-0.654	-90.5493	1	60	0.726667
1540	Ayora	Dec	2002	24.4	Night	Landing	Santa Cruz	Santa Cruz	Centre- South	11.3	-0.7485	-90.4464	2	3	1.21667
1541	Ayora	Dec	2002	24.4	Day	Landing	Santa Cruz	Santa Cruz	Centre- South	7.42	-0.71	-90.2128	2	5	0.23
1542	Ayora	Dec	2002	24.4	Day	Landing	Santa Cruz	Santa Cruz	Centre- South	14.6	-0.7236	-90.4896	1	5	0.28
1543	Ayora	Dec	2002	24.4	Night	Landing	Santa Cruz	Santa Cruz	Centre- South	14	-0.73309	-90.4665	2	4	0.65375
1544	Ayora	Dec	2002	24.4	Day	Landing	Santa Cruz	Santa Cruz	Centre- South	33.6	-0.514	-90.4798	1	48	1.20208
1545	Ayora	Dec	2002	24.4	Day	Landing	Santa Cruz	Santa Cruz	Centre- South	9.51	-0.75504	-90.4214	1	6	0.0833333
1546	Ayora	Dec	2002	24.4	Day	Landing	Santa Cruz	Santa Cruz	Centre- South	7.42	-0.71	-90.2128	1	6	0.0833333
1547	Ayora	Dec	2002	24.4	Day	Landing	Santa Cruz	Santa Cruz	Centre- South	14.6	-0.7236	-90.4896	1	8	0.0625
1548	Ayora	Dec	2002	24.4	Day	Landing	Santa Cruz	Santa Cruz	Centre- South	11.3	-0.7485	-90.4464	2	12	0.229167
1549	Baquerizo	Sep	2003	20.2	Night	Landing	Española	Española	Centre- South	36.6	-1.3477	-89.6749	1	6	0.756667
1550	Baquerizo	Sep	2003	20.2	Day	Landing	Española	Española	Centre- South	36.6	-1.3477	-89.6749	1	2	0.905
1551	Baquerizo	Sep	2003	20.2	Night	Landing	Española	Española	Centre- South	35.4	-1.36813	-89.7406	4	12	1.30667
1552	Baquerizo	Sep	2003	20.2	Night	Landing	Española	Española	Centre- South	35.4	-1.36813	-89.7406	2	24	4.49792
1553	Baquerizo	Sep	2003	20.2	Night	Observer	Española	Española	Centre- South	35.4	-1.36813	-89.7406	10	21	0.230952
1554	Villamil	Sep	2003	20.9	Day	Observer	Floreana	Floreana	Centre- South	49.2	-1.24961	-90.3758	1	2	1.35
1555	Villamil	Sep	2003	20.9	Day	Observer	Floreana	Floreana	Centre- South	49.2	-1.24934	-90.3762	1	2	1.15
1556	Villamil	Sep	2003	20.9	Day	Observer	Floreana	Floreana	Centre- South	49.2	-1.24884	-90.372	1	2	1.8
1557	Baquerizo	Sep	2003	20.9	Night	Observer	Floreana	Floreana	Centre- South	69.4	-1.29001	-90.4992	2	5	0.81
1558	Baquerizo	Sep	2003	20.9	Night	Observer	Floreana	Floreana	Centre- South	60.4	-1.3141	-90.3769	2	5	0.5
1559	Baquerizo	Sep	2003	20.9	Night	Observer	Floreana	Floreana	Centre- South	69.4	-1.35852	-90.3585	1	8	1.8125
1560	Baquerizo	Sep	2003	20.9	Night	Observer	Floreana	Floreana	Centre- South	69.4	-1.35888	-90.4602	2	6	1.01667
1561	Baquerizo	Sep	2003	20.9	Night	Observer	Floreana	Floreana	Centre- South	69.4	-1.29001	-90.4992	2	5	0.68
1562	Baquerizo	Sep	2003	20.9	Night	Observer	Floreana	Floreana	Centre- South	69.4	-1.29001	-90.4992	1	5	1.18
1563	Baquerizo	Sep	2003	20.9	Night	Observer	Floreana	Floreana	Centre- South	60.4	-1.3141	-90.3769	2	5	1.863
1564	Baquerizo	Sep	2003	20.9	Night	Observer	Floreana	Floreana	Centre- South	69.4	-1.29001	-90.4992	10	24	0.239167
1565	Baquerizo	Sep	2003	20.9	Night	Observer	Floreana	Floreana	Centre- South	60.4	-1.3141	-90.3769	10	10	0.05
1566	Ayora	Sep	2003	21.7	Night	Landing	Genovesa	Genovesa	North	71.1	0.3123	-89.9583	1	24	3.4375
1567	Ayora	Sep	2003	21.7	Day	Landing	Isabela Norte y Este	Isabela	West	90.6	0.1711	-91.3558	2	25	0.8
1568	Ayora	Sep	2003	21.7	Day	Landing	Isabela Norte y Este	Isabela	West	90.6	0.1711	-91.3558	2	25	0.8
1569	Ayora	Sep	2003	21.7	Day	Observer	Isabela Norte y Este	Isabela	West	104	0.06442	-91.5048	1	6	1.83333
1570	Ayora	Sep	2003	21.7	Day	Observer	Isabela Norte y Este	Isabela	West	50.3	-0.41559	-90.9724	2	4	0.25
1571	Ayora	Sep	2003	21.7	Day	Observer	Isabela Norte y Este	Isabela	West	50.3	-0.41345	-90.9745	2	5	0.7
1572	Ayora	Sep	2003	21.7	Day	Observer	Isabela Norte y Este	Isabela	West	50.3	-0.41559	-90.9724	1	4	0.25
1573	Ayora	Sep	2003	21.7	Day	Observer	Isabela Norte y Este	Isabela	West	90.6	0.16849	-91.3371	2	4	0.875
1574	Ayora	Sep	2003	21.7	Day	Observer	Isabela Norte y Este	Isabela	West	90.6	0.17005	-91.3412	2	9	1.02778
1575	Ayora	Sep	2003	21.7	Day	Observer	Isabela Norte y Este	Isabela	West	90.6	0.17005	-91.3412	1	9	1.44444
1576	Ayora	Sep	2003	21.7	Day	Observer	Isabela Norte y Este	Isabela	West	90.6	0.17005	-91.3412	1	4	3.25
1577	Ayora	Sep	2003	21.7	Night	Observer	Isabela Norte y Este	Isabela	West	90.6	0.1711	-91.3558	2	5	1
1578	Ayora	Sep	2003	21.7	Night	Observer	Isabela Norte y Este	Isabela	West	104	0.06442	-91.5048	2	5	1
1579	Ayora	Sep	2003	21.7	Day	Observer	Isabela Norte y Este	Isabela	West	104	0.10562	-91.4819	1	5	1
1580	Ayora	Sep	2003	21.7	Day	Landing	Isabela Norte y Este	Isabela	West	61.2	-0.3039	-91.0875	1	12	5.11667
1581	Ayora	Sep	2003	21.7	Day	Observer	Isabela Norte y Este	Isabela	West	42.2	-0.63742	-90.8748	9	4	0.416667
1582	Ayora	Sep	2003	21.7	Day	Observer	Isabela Norte y Este	Isabela	West	90.6	0.17005	-91.3412	9	5	1.37778
1583	Ayora	Sep	2003	21.7	Day	Observer	Isabela Norte y Este	Isabela	West	104	0.10562	-91.4819	9	5	1.08889
1584	Ayora	Sep	2003	21.7	Day	Observer	Isabela Norte y Este	Isabela	West	104	0.10562	-91.4819	2	5	0.9
1585	Ayora	Sep	2003	21.7	Day	Observer	Isabela Norte y Este	Isabela	West	104	0.10562	-91.4819	1	5	0.8
1586	Ayora	Sep	2003	21.7	Day	Observer	Isabela Norte y Este	Isabela	West	104	0.10562	-91.4819	2	5	1
1587	Villamil	Sep	2003	21.7	Day	Landing	Isabela Norte y Este	Isabela	West	40.8	-0.58936	-90.9423	2	4	0.5125
1588	Villamil	Sep	2003	21.7	Day	Landing	Isabela Norte y Este	Isabela	West	40.8	-0.58936	-90.9423	1	4	0.35
1589	Baquerizo	Sep	2003	21.7	Night	Landing	Isabela Norte y Este	Isabela	West	88.3	-0.4944	-90.95	2	16	3.18187
1590	Ayora	Sep	2003	20.6	Night	Landing	Isabela Oeste	Isabela	West	97.6	-0.74136	-91.3916	1	4	5.17
1591	Ayora	Sep	2003	20.6	Day	Landing	Isabela Oeste	Isabela	West	129	-0.03656	-91.4306	1	12	1.81667
1592	Ayora	Sep	2003	20.6	Day	Observer	Isabela Oeste	Isabela	West	134	-0.20402	-91.3871	1	5	1
1593	Ayora	Sep	2003	20.6	Day	Observer	Isabela Oeste	Isabela	West	117	-0.38585	-91.2499	1	5	1.3
1594	Ayora	Sep	2003	20.6	Day	Observer	Isabela Oeste	Isabela	West	117	-0.43544	-91.2364	1	5	1.9
1595	Ayora	Sep	2003	20.6	Day	Observer	Isabela Oeste	Isabela	West	134	-0.2012	-91.3915	1	5	0.9
1596	Ayora	Sep	2003	20.6	Night	Observer	Isabela Oeste	Isabela	West	138	-0.0627	-91.4074	2	4	1.9375
1597	Ayora	Sep	2003	20.6	Day	Observer	Isabela Oeste	Isabela	West	134	-0.20402	-91.3871	1	5	1.2
1598	Ayora	Sep	2003	20.6	Day	Observer	Isabela Oeste	Isabela	West	134	-0.20402	-91.3871	2	5	0.25
1599	Ayora	Sep	2003	20.6	Day	Observer	Isabela Oeste	Isabela	West	134	-0.20402	-91.3871	2	5	0.45
1600	Ayora	Sep	2003	20.6	Day	Observer	Isabela Oeste	Isabela	West	117	-0.38585	-91.2499	2	5	0.45
1601	Ayora	Sep	2003	20.6	Day	Observer	Isabela Oeste	Isabela	West	117	-0.38585	-91.2499	2	5	0.65
1602	Ayora	Sep	2003	20.6	Day	Observer	Isabela Oeste	Isabela	West	117	-0.38585	-91.2499	2	3	1.58333
1603	Ayora	Sep	2003	20.6	Day	Observer	Isabela Oeste	Isabela	West	117	-0.38585	-91.2499	1	5	2.1
1604	Ayora	Sep	2003	20.6	Day	Observer	Isabela Oeste	Isabela	West	117	-0.38585	-91.2499	1	5	1
1605	Ayora	Sep	2003	20.6	Day	Observer	Isabela Oeste	Isabela	West	138	-0.0627	-91.4074	9	4	0.430556
1606	Ayora	Sep	2003	20.6	Day	Observer	Isabela Oeste	Isabela	West	134	-0.20402	-91.3871	9	5	0.5
1607	Ayora	Sep	2003	20.6	Day	Observer	Isabela Oeste	Isabela	West	117	-0.38585	-91.2499	9	5	0.944444
1608	Villamil	Sep	2003	20.6	Day	Landing	Isabela Oeste	Isabela	West	76.7	-0.43544	-91.2364	1	15	0.545333
1609	Villamil	Sep	2003	20.6	Day	Landing	Isabela Oeste	Isabela	West	76.7	-0.43544	-91.2364	1	15	1.59067
1610	Villamil	Sep	2003	20.6	Day	Landing	Isabela Oeste	Isabela	West	76.7	-0.43544	-91.2364	2	19	0.842105
1611	Villamil	Sep	2003	20.6	Day	Landing	Isabela Oeste	Isabela	West	76.7	-0.43544	-91.2364	2	10	3.295
1612	Villamil	Sep	2003	20.6	Day	Landing	Isabela Oeste	Isabela	West	51.7	-0.74136	-91.3916	1	32	0.4375
1613	Baquerizo	Sep	2003	20.6	Night	Observer	Isabela Oeste	Isabela	West	178	-0.57344	-90.7214	1	5	1.9
1614	Baquerizo	Sep	2003	20.6	Night	Observer	Isabela Oeste	Isabela	West	178	-0.57378	-90.7217	2	6	0.45
1615	Baquerizo	Sep	2003	20.6	Night	Observer	Isabela Oeste	Isabela	West	178	-0.49371	-91.2054	2	5	0.47
1616	Baquerizo	Sep	2003	20.6	Night	Observer	Isabela Oeste	Isabela	West	178	-0.49371	-91.2054	2	5	1
1617	Baquerizo	Sep	2003	20.6	Night	Observer	Isabela Oeste	Isabela	West	178	-0.49371	-91.2054	2	4	1.5625
1618	Ayora	Sep	2003	20.9	Night	Landing	Isabela Sur	Isabela	West	33.3	-0.79173	-90.8193	1	2.5	2.816
1619	Villamil	Sep	2003	20.9	Day	Landing	Isabela Sur	Isabela	West	17	-0.79173	-90.8193	1	6	2.08333
1620	Villamil	Sep	2003	20.9	Day	Landing	Isabela Sur	Isabela	West	17	-0.79173	-90.8193	1	3	0.166667
1621	Villamil	Sep	2003	20.9	Day	Landing	Isabela Sur	Isabela	West	17	-0.79173	-90.8193	1	4	0.45
1622	Villamil	Sep	2003	20.9	Day	Landing	Isabela Sur	Isabela	West	4.83	-1.0041	-91.039	1	5	1
1623	Villamil	Sep	2003	20.9	Day	Landing	Isabela Sur	Isabela	West	4.83	-1.0041	-91.039	1	5	0.59
1624	Villamil	Sep	2003	20.9	Day	Landing	Isabela Sur	Isabela	West	4.83	-1.0041	-91.039	1	4	0.1125
1625	Villamil	Sep	2003	20.9	Day	Landing	Isabela Sur	Isabela	West	4.83	-1.0041	-91.039	1	4	0.1
1626	Villamil	Sep	2003	20.9	Day	Landing	Isabela Sur	Isabela	West	4.83	-1.0041	-91.039	1	2.5	1.2
1627	Villamil	Sep	2003	20.9	Day	Landing	Isabela Sur	Isabela	West	4.83	-1.0041	-91.039	2	5	0.09
1628	Villamil	Sep	2003	20.9	Day	Landing	Isabela Sur	Isabela	West	4.83	-1.0041	-91.039	2	5	0.18
1629	Villamil	Sep	2003	20.9	Day	Landing	Isabela Sur	Isabela	West	4.83	-1.0041	-91.039	1	2	1
1630	Villamil	Sep	2003	20.9	Day	Landing	Isabela Sur	Isabela	West	4.83	-1.0041	-91.039	1	4	1.125
1631	Villamil	Sep	2003	20.9	Day	Landing	Isabela Sur	Isabela	West	4.83	-1.0041	-91.039	2	5	0.09
1632	Villamil	Sep	2003	20.9	Day	Observer	Isabela Sur	Isabela	West	4.83	-0.97607	-90.9847	1	3	0.833333
1633	Villamil	Sep	2003	20.9	Day	Landing	Isabela Sur	Isabela	West	4.83	-1.0041	-91.039	1	3	0.166667
1634	Villamil	Sep	2003	20.9	Day	Landing	Isabela Sur	Isabela	West	4.83	-1.0041	-91.039	2	2	0.225
1635	Villamil	Sep	2003	20.9	Day	Landing	Isabela Sur	Isabela	West	4.83	-1.0041	-91.039	2	3	0.15
1636	Villamil	Sep	2003	20.9	Day	Landing	Isabela Sur	Isabela	West	4.83	-1.0041	-91.039	2	1	2.05
1637	Villamil	Sep	2003	20.9	Day	Landing	Isabela Sur	Isabela	West	14.7	-1.05069	-91.1743	2	14	0.860714
1638	Villamil	Sep	2003	20.9	Day	Landing	Isabela Sur	Isabela	West	14.7	-1.05069	-91.1743	2	5	0.55
1639	Villamil	Sep	2003	20.9	Day	Landing	Isabela Sur	Isabela	West	14.7	-1.05069	-91.1743	1	3	1.06667
1640	Villamil	Sep	2003	20.9	Day	Landing	Isabela Sur	Isabela	West	14.7	-1.05069	-91.1743	1	5	1
1641	Villamil	Sep	2003	20.9	Day	Landing	Isabela Sur	Isabela	West	14.7	-1.05069	-91.1743	1	4	1.65
1642	Villamil	Sep	2003	20.9	Day	Landing	Isabela Sur	Isabela	West	14.7	-1.05069	-91.1743	2	8	0.25625
1643	Villamil	Sep	2003	20.9	Day	Landing	Isabela Sur	Isabela	West	14.7	-1.05069	-91.1743	2	8	0.1125
1644	Villamil	Sep	2003	20.9	Day	Landing	Isabela Sur	Isabela	West	14.7	-1.05069	-91.1743	1	4	3.125
1645	Villamil	Sep	2003	20.9	Night	Landing	Isabela Sur	Isabela	West	1.93	-0.97723	-90.988	1	2	0.115
1646	Villamil	Sep	2003	20.9	Night	Landing	Isabela Sur	Isabela	West	1.93	-0.97723	-90.988	1	2	0.225
1647	Villamil	Sep	2003	20.9	Day	Landing	Isabela Sur	Isabela	West	1.93	-0.97723	-90.988	2	5	0.341
1648	Villamil	Sep	2003	20.9	Day	Landing	Isabela Sur	Isabela	West	1.93	-0.97723	-90.988	1	3	0.766667
1649	Villamil	Sep	2003	20.9	Day	Landing	Isabela Sur	Isabela	West	12.2	-1.0394	-91.1467	2	10	0.92
1650	Villamil	Sep	2003	20.9	Day	Landing	Isabela Sur	Isabela	West	12.2	-1.0394	-91.1467	1	15	2.91333
1651	Villamil	Sep	2003	20.9	Day	Landing	Isabela Sur	Isabela	West	34.2	-0.95519	-91.461	2	15	0.17
1652	Villamil	Sep	2003	20.9	Day	Landing	Isabela Sur	Isabela	West	9.18	-1.02	-91.1	1	4	0.5675
1653	Villamil	Sep	2003	20.9	Day	Landing	Isabela Sur	Isabela	West	9.18	-1.02	-91.1	2	4	0.1125
1654	Villamil	Sep	2003	20.9	Day	Landing	Isabela Sur	Isabela	West	9.18	-1.02	-91.1	1	3	0.3
1655	Villamil	Sep	2003	20.9	Day	Landing	Isabela Sur	Isabela	West	9.18	-1.02	-91.1	1	5	0.1
1656	Villamil	Sep	2003	20.9	Day	Landing	Isabela Sur	Isabela	West	9.18	-1.02	-91.1	1	5	1.28
1657	Villamil	Sep	2003	20.9	Day	Landing	Isabela Sur	Isabela	West	9.18	-1.02	-91.1	1	5	0.18
1658	Villamil	Sep	2003	20.9	Day	Landing	Isabela Sur	Isabela	West	9.18	-1.02	-91.1	1	5	0.18
1659	Villamil	Sep	2003	20.9	Day	Landing	Isabela Sur	Isabela	West	9.18	-1.02	-91.1	2	5	0.02
1660	Villamil	Sep	2003	20.9	Day	Landing	Isabela Sur	Isabela	West	9.18	-1.02	-91.1	2	5	0.18
1661	Villamil	Sep	2003	20.9	Day	Observer	Isabela Sur	Isabela	West	9.18	-0.96607	-90.8726	1	4	0.175
1662	Villamil	Sep	2003	20.9	Day	Observer	Isabela Sur	Isabela	West	9.18	-0.96607	-90.8726	1	2	0.35
1663	Villamil	Sep	2003	20.9	Day	Observer	Isabela Sur	Isabela	West	9.18	-0.96607	-90.8726	1	3	0.766667
1664	Villamil	Sep	2003	20.9	Day	Observer	Isabela Sur	Isabela	West	9.18	-0.96607	-90.8726	1	3	0.9
1665	Villamil	Sep	2003	20.9	Night	Landing	Isabela Sur	Isabela	West	9.18	-1.02	-91.1	1	5	1.36
1666	Villamil	Sep	2003	20.9	Day	Landing	Isabela Sur	Isabela	West	9.18	-1.02	-91.1	1	5	0.32
1667	Villamil	Sep	2003	20.9	Day	Landing	Isabela Sur	Isabela	West	9.18	-1.02	-91.1	1	5	0.28
1668	Villamil	Sep	2003	20.9	Day	Landing	Isabela Sur	Isabela	West	1.21	-0.978203	-90.9576	1	3	0.6
1669	Villamil	Sep	2003	20.9	Day	Landing	Isabela Sur	Isabela	West	2.1	-0.9711	-90.9343	1	4	0.05
1670	Villamil	Sep	2003	20.9	Day	Landing	Isabela Sur	Isabela	West	14.9	-1.04912	-91.1846	2	18	0.619444
1671	Villamil	Sep	2003	20.9	Night	Landing	Isabela Sur	Isabela	West	14.9	-1.04912	-91.1846	1	8	0.625
1672	Villamil	Sep	2003	20.9	Day	Landing	Isabela Sur	Isabela	West	6.56	-1.01864	-91.0558	2	5	0.45
1673	Villamil	Sep	2003	20.9	Day	Landing	Isabela Sur	Isabela	West	6.56	-1.01864	-91.0558	2	5	0.36
1674	Villamil	Sep	2003	20.9	Day	Landing	Isabela Sur	Isabela	West	6.56	-1.01864	-91.0558	2	4	0.0875
1675	Villamil	Sep	2003	20.9	Day	Landing	Isabela Sur	Isabela	West	6.56	-1.01864	-91.0558	2	5	0.09
1676	Villamil	Sep	2003	20.9	Day	Landing	Isabela Sur	Isabela	West	6.56	-1.01864	-91.0558	1	5	0.1
1677	Villamil	Sep	2003	20.9	Day	Landing	Isabela Sur	Isabela	West	6.56	-1.01864	-91.0558	2	5	0.36
1678	Villamil	Sep	2003	20.9	Day	Landing	Isabela Sur	Isabela	West	6.56	-1.01864	-91.0558	2	5	0.05
1679	Villamil	Sep	2003	20.9	Day	Landing	Isabela Sur	Isabela	West	6.56	-1.01864	-91.0558	1	5	0.04
1680	Villamil	Sep	2003	20.9	Night	Landing	Isabela Sur	Isabela	West	8.1	-0.92	-90.85	1	3	0.833333
1681	Villamil	Sep	2003	20.9	Day	Landing	Isabela Sur	Isabela	West	9.22	-1.03944	-91.0943	1	3	0.166667
1682	Villamil	Sep	2003	20.9	Day	Landing	Isabela Sur	Isabela	West	9.22	-1.03944	-91.0943	2	4	0.375
1683	Villamil	Sep	2003	20.9	Day	Landing	Isabela Sur	Isabela	West	9.22	-1.03944	-91.0943	1	5	0.18
1684	Villamil	Sep	2003	20.9	Day	Landing	Isabela Sur	Isabela	West	9.22	-1.03944	-91.0943	1	5	0.18
1685	Villamil	Sep	2003	20.9	Day	Landing	Isabela Sur	Isabela	West	9.22	-1.03944	-91.0943	1	5	0.04
1686	Ayora	Sep	2003	22.8	Day	Landing	Marchena	Marchena	North	104	0.640889	-90.7649	2	24	0.18125
1687	Baquerizo	Sep	2003	22.8	Night	Landing	Marchena	Marchena	North	100	0.640889	-90.7649	3	16	1.50562
1688	Baquerizo	Sep	2003	22.8	Night	Observer	Marchena	Marchena	North	109	0.38535	-90.4985	2	5	1.45
1689	Baquerizo	Sep	2003	22.8	Night	Observer	Marchena	Marchena	North	104	0.366883	-90.4402	2	5	0.77
1690	Baquerizo	Sep	2003	22.8	Night	Observer	Marchena	Marchena	North	109	0.38535	-90.4985	2	6	0.541667
1691	Baquerizo	Sep	2003	22.8	Night	Observer	Marchena	Marchena	North	109	0.38535	-90.4985	1	5	1.9
1692	Baquerizo	Sep	2003	22.8	Night	Observer	Marchena	Marchena	North	109	0.38535	-90.4985	1	5	3.8
1693	Baquerizo	Sep	2003	22.8	Night	Observer	Marchena	Marchena	North	109	0.38535	-90.4985	2	5	2.54
1694	Baquerizo	Sep	2003	22.8	Night	Observer	Marchena	Marchena	North	109	0.38535	-90.4985	1	7	2.98571
1695	Baquerizo	Sep	2003	22.8	Night	Observer	Marchena	Marchena	North	109	0.38535	-90.4985	2	5	1.09
1696	Baquerizo	Sep	2003	22.8	Night	Observer	Marchena	Marchena	North	104	0.35294	-90.4254	2	5	2.9
1697	Baquerizo	Sep	2003	22.8	Night	Observer	Marchena	Marchena	North	104	0.366883	-90.4402	2	6	0.958333
1698	Baquerizo	Sep	2003	22.8	Night	Observer	Marchena	Marchena	North	104	0.366883	-90.4402	2	4	0.7
1699	Baquerizo	Sep	2003	22.8	Night	Observer	Marchena	Marchena	North	104	0.366883	-90.4402	1	4	0.675
1700	Baquerizo	Sep	2003	22.8	Night	Observer	Marchena	Marchena	North	109	0.38535	-90.4985	2	5	2.06
1701	Baquerizo	Sep	2003	22.8	Night	Observer	Marchena	Marchena	North	109	0.38535	-90.4985	1	3	0.833333
1702	Baquerizo	Sep	2003	22.8	Night	Observer	Marchena	Marchena	North	104	0.366883	-90.4402	2	5	1.36
1703	Baquerizo	Sep	2003	22.8	Night	Observer	Marchena	Marchena	North	104	0.366883	-90.4402	2	5	0.54
1704	Baquerizo	Sep	2003	22.8	Night	Observer	Marchena	Marchena	North	104	0.366883	-90.4402	2	6	0.983333
1705	Baquerizo	Sep	2003	22.8	Night	Observer	Marchena	Marchena	North	104	0.366883	-90.4402	10	40	0.21825
1706	Baquerizo	Oct	2003	23.3	Night	Landing	Española	Española	Centre- South	36.6	-1.3477	-89.6749	1	15	1.72667
1707	Baquerizo	Oct	2003	23.3	Day	Landing	Española	Española	Centre- South	33	1.3434	-89.6983	1	14	3.08429
1708	Ayora	Oct	2003	22.9	Day	Landing	Floreana	Floreana	Centre- South	30.1	-1.25857	-90.3642	1	8	1.1
1709	Ayora	Oct	2003	24	Day	Observer	Isabela Norte y Este	Isabela	West	42.2	-0.58936	-90.9423	1	4	0.475
1710	Ayora	Oct	2003	24	Day	Observer	Isabela Norte y Este	Isabela	West	42.2	-0.58936	-90.9423	2	4	0.1875
1711	Ayora	Oct	2003	24	Day	Observer	Isabela Norte y Este	Isabela	West	42.2	-0.60592	-90.8937	1	5	1
1712	Ayora	Oct	2003	24	Day	Observer	Isabela Norte y Este	Isabela	West	42.2	-0.60592	-90.8937	1	5	0.2
1713	Ayora	Oct	2003	24	Day	Landing	Isabela Norte y Este	Isabela	West	90.6	0.1711	-91.3558	2	24	0.880625
1714	Ayora	Oct	2003	24	Day	Landing	Isabela Norte y Este	Isabela	West	47.3	-0.4944	-90.95	2	12	1.15542
1715	Ayora	Oct	2003	24	Day	Landing	Isabela Norte y Este	Isabela	West	61.2	-0.3039	-91.0875	1	12	3.86333
1716	Ayora	Oct	2003	24	Day	Landing	Isabela Norte y Este	Isabela	West	90.6	0.1711	-91.3558	1	15	1.94
1717	Villamil	Oct	2003	24	Day	Landing	Isabela Norte y Este	Isabela	West	40.8	-0.58936	-90.9423	2	15	1.44
1718	Baquerizo	Oct	2003	24	Night	Landing	Isabela Norte y Este	Isabela	West	143	0.1711	-91.3558	9	12	0.276296
1719	Ayora	Oct	2003	22.4	Night	Landing	Isabela Oeste	Isabela	West	97.6	-0.74136	-91.3916	1	8	1.725
1720	Ayora	Oct	2003	22.4	Day	Landing	Isabela Oeste	Isabela	West	117	-0.43544	-91.2364	1	6	3.86667
1721	Baquerizo	Oct	2003	22.4	Night	Landing	Isabela Oeste	Isabela	West	178	-0.43544	-91.2364	9	24	0.0691667
1722	Ayora	Oct	2003	22.8	Day	Landing	Isabela Sur	Isabela	West	63.3	-1.0358	-91.2282	4	25	0.418
1723	Villamil	Oct	2003	22.8	Day	Landing	Isabela Sur	Isabela	West	17	-0.79173	-90.8193	1	8	1.5875
1724	Villamil	Oct	2003	22.8	Day	Landing	Isabela Sur	Isabela	West	17	-0.79173	-90.8193	1	4	2.275
1725	Villamil	Oct	2003	22.8	Day	Landing	Isabela Sur	Isabela	West	17	-0.79173	-90.8193	1	3.5	1.94286
1726	Villamil	Oct	2003	22.8	Day	Landing	Isabela Sur	Isabela	West	17	-0.79173	-90.8193	1	3	2.4
1727	Villamil	Oct	2003	22.8	Day	Landing	Isabela Sur	Isabela	West	17	-0.79173	-90.8193	1	3.5	1.42857
1728	Villamil	Oct	2003	22.8	Day	Landing	Isabela Sur	Isabela	West	4.83	-1.0041	-91.039	1	3	2.43333
1729	Villamil	Oct	2003	22.8	Day	Landing	Isabela Sur	Isabela	West	4.83	-1.0041	-91.039	1	3	0.6
1730	Villamil	Oct	2003	22.8	Day	Landing	Isabela Sur	Isabela	West	4.83	-1.0041	-91.039	1	3	0.166667
1731	Villamil	Oct	2003	22.8	Day	Landing	Isabela Sur	Isabela	West	4.83	-1.0041	-91.039	1	4	0.175
1732	Villamil	Oct	2003	22.8	Night	Landing	Isabela Sur	Isabela	West	4.83	-1.0041	-91.039	1	4	0.125
1733	Villamil	Oct	2003	22.8	Day	Landing	Isabela Sur	Isabela	West	4.83	-1.0041	-91.039	2	4	0.5125
1734	Villamil	Oct	2003	22.8	Night	Landing	Isabela Sur	Isabela	West	4.83	-1.0041	-91.039	1	3	0.466667
1735	Villamil	Oct	2003	22.8	Day	Landing	Isabela Sur	Isabela	West	4.83	-1.0041	-91.039	1	4	0.35
1736	Villamil	Oct	2003	22.8	Day	Landing	Isabela Sur	Isabela	West	4.83	-1.0041	-91.039	1	4	0.1
1737	Villamil	Oct	2003	22.8	Day	Landing	Isabela Sur	Isabela	West	4.83	-1.0041	-91.039	1	2.5	0.456
1738	Villamil	Oct	2003	22.8	Day	Landing	Isabela Sur	Isabela	West	4.83	-1.0041	-91.039	1	3	0.733333
1739	Villamil	Oct	2003	22.8	Day	Landing	Isabela Sur	Isabela	West	4.83	-1.0041	-91.039	1	3	0.433333
1740	Villamil	Oct	2003	22.8	Day	Landing	Isabela Sur	Isabela	West	14.7	-1.05069	-91.1743	1	5	0.04
1741	Villamil	Oct	2003	22.8	Day	Landing	Isabela Sur	Isabela	West	14.7	-1.05069	-91.1743	1	8	0.3125
1742	Villamil	Oct	2003	22.8	Day	Landing	Isabela Sur	Isabela	West	14.7	-1.05069	-91.1743	2	5	0.48
1743	Villamil	Oct	2003	22.8	Day	Landing	Isabela Sur	Isabela	West	14.7	-1.05069	-91.1743	2	5	0.48
1744	Villamil	Oct	2003	22.8	Day	Landing	Isabela Sur	Isabela	West	14.7	-1.05069	-91.1743	1	5	0.28
1745	Villamil	Oct	2003	22.8	Day	Landing	Isabela Sur	Isabela	West	14.7	-1.05069	-91.1743	1	5	0.86
1746	Villamil	Oct	2003	22.8	Day	Landing	Isabela Sur	Isabela	West	14.7	-1.05069	-91.1743	1	4	0.125
1747	Villamil	Oct	2003	22.8	Day	Landing	Isabela Sur	Isabela	West	14.7	-1.05069	-91.1743	2	4	0.0875
1748	Villamil	Oct	2003	22.8	Day	Landing	Isabela Sur	Isabela	West	14.7	-1.05069	-91.1743	1	4	0.575
1749	Villamil	Oct	2003	22.8	Day	Landing	Isabela Sur	Isabela	West	14.7	-1.05069	-91.1743	1	8	1.1875
1750	Villamil	Oct	2003	22.8	Night	Landing	Isabela Sur	Isabela	West	14.7	-1.05069	-91.1743	1	3	1.06667
1751	Villamil	Oct	2003	22.8	Day	Landing	Isabela Sur	Isabela	West	14.7	-1.05069	-91.1743	1	4	2.625
1752	Villamil	Oct	2003	22.8	Day	Landing	Isabela Sur	Isabela	West	14.7	-1.05069	-91.1743	1	8	0.225
1753	Villamil	Oct	2003	22.8	Day	Landing	Isabela Sur	Isabela	West	14.7	-1.05069	-91.1743	1	2	1.6
1754	Villamil	Oct	2003	22.8	Day	Landing	Isabela Sur	Isabela	West	14.7	-1.05069	-91.1743	2	12	0.454167
1755	Villamil	Oct	2003	22.8	Day	Landing	Isabela Sur	Isabela	West	0.52	-0.96708	-90.9665	1	3	0.9
1756	Villamil	Oct	2003	22.8	Night	Landing	Isabela Sur	Isabela	West	1.93	-0.97723	-90.988	1	3	0.3
1757	Villamil	Oct	2003	22.8	Day	Landing	Isabela Sur	Isabela	West	1.93	-0.97723	-90.988	1	4	0.975
1758	Villamil	Oct	2003	22.8	Day	Landing	Isabela Sur	Isabela	West	1.93	-0.97723	-90.988	2	9	0.0277778
1759	Villamil	Oct	2003	22.8	Night	Landing	Isabela Sur	Isabela	West	12.2	-1.0394	-91.1467	1	4	3.3
1760	Villamil	Oct	2003	22.8	Day	Observer	Isabela Sur	Isabela	West	12.2	-1.04325	-91.1625	1	7	2.6
1761	Villamil	Oct	2003	22.8	Day	Observer	Isabela Sur	Isabela	West	12.2	-1.03939	-91.1469	1	8	1.075
1762	Villamil	Oct	2003	22.8	Day	Landing	Isabela Sur	Isabela	West	12.2	-1.0394	-91.1467	1	3	1.36667
1763	Villamil	Oct	2003	22.8	Day	Observer	Isabela Sur	Isabela	West	12.2	-1.04331	-91.1629	1	7	0.811429
1764	Villamil	Oct	2003	22.8	Day	Observer	Isabela Sur	Isabela	West	12.2	-1.03475	-91.1476	1	3	1.89333
1765	Villamil	Oct	2003	22.8	Day	Landing	Isabela Sur	Isabela	West	12.2	-1.0394	-91.1467	1	35	0.142857
1766	Villamil	Oct	2003	22.8	Day	Landing	Isabela Sur	Isabela	West	12.2	-1.0394	-91.1467	1	14	2.4
1767	Villamil	Oct	2003	22.8	Day	Landing	Isabela Sur	Isabela	West	12.2	-1.0394	-91.1467	1	20	0.475
1768	Villamil	Oct	2003	22.8	Day	Landing	Isabela Sur	Isabela	West	12.2	-1.0394	-91.1467	1	2	1.35
1769	Villamil	Oct	2003	22.8	Day	Landing	Isabela Sur	Isabela	West	12.2	-1.0394	-91.1467	2	3.5	0.0714286
1770	Villamil	Oct	2003	22.8	Day	Landing	Isabela Sur	Isabela	West	12.2	-1.0394	-91.1467	2	15	0.56
1771	Villamil	Oct	2003	22.8	Day	Landing	Isabela Sur	Isabela	West	12.2	-1.0394	-91.1467	1	18	1.36667
1772	Villamil	Oct	2003	22.8	Day	Landing	Isabela Sur	Isabela	West	34.2	-0.95519	-91.461	1	12	0.133333
1773	Villamil	Oct	2003	22.8	Day	Landing	Isabela Sur	Isabela	West	7.27	-1.0306	-90.8846	1	4	0.575
1774	Villamil	Oct	2003	22.8	Day	Landing	Isabela Sur	Isabela	West	9.18	-1.02	-91.1	1	3	0.166667
1775	Villamil	Oct	2003	22.8	Day	Landing	Isabela Sur	Isabela	West	9.18	-1.02	-91.1	1	4	0.35
1776	Villamil	Oct	2003	22.8	Day	Landing	Isabela Sur	Isabela	West	9.18	-1.02	-91.1	1	5	0.6
1777	Villamil	Oct	2003	22.8	Day	Landing	Isabela Sur	Isabela	West	9.18	-1.02	-91.1	1	5	0.18
1778	Villamil	Oct	2003	22.8	Day	Landing	Isabela Sur	Isabela	West	9.18	-1.02	-91.1	2	5	0.23
1779	Villamil	Oct	2003	22.8	Day	Landing	Isabela Sur	Isabela	West	9.18	-1.02	-91.1	1	5	0.82
1780	Villamil	Oct	2003	22.8	Day	Landing	Isabela Sur	Isabela	West	9.18	-1.02	-91.1	1	5	0.64
1781	Villamil	Oct	2003	22.8	Day	Landing	Isabela Sur	Isabela	West	9.18	-1.02	-91.1	1	5	0.1
1782	Villamil	Oct	2003	22.8	Day	Landing	Isabela Sur	Isabela	West	9.18	-1.02	-91.1	1	4	0.4
1783	Villamil	Oct	2003	22.8	Night	Landing	Isabela Sur	Isabela	West	9.18	-1.02	-91.1	2	4	2.8375
1784	Villamil	Oct	2003	22.8	Day	Landing	Isabela Sur	Isabela	West	9.18	-1.02	-91.1	1	4	0.125
1785	Villamil	Oct	2003	22.8	Day	Landing	Isabela Sur	Isabela	West	9.18	-1.02	-91.1	1	4	0.35
1786	Villamil	Oct	2003	22.8	Night	Landing	Isabela Sur	Isabela	West	9.18	-1.02	-91.1	1	4	1.6
1787	Villamil	Oct	2003	22.8	Day	Landing	Isabela Sur	Isabela	West	9.18	-1.02	-91.1	1	10	0.64
1788	Villamil	Oct	2003	22.8	Day	Landing	Isabela Sur	Isabela	West	9.18	-1.02	-91.1	1	3	1.6
1789	Villamil	Oct	2003	22.8	Day	Landing	Isabela Sur	Isabela	West	9.18	-1.02	-91.1	2	3	0.3
1790	Villamil	Oct	2003	22.8	Day	Landing	Isabela Sur	Isabela	West	9.18	-1.02	-91.1	2	4	0.3875
1791	Villamil	Oct	2003	22.8	Day	Landing	Isabela Sur	Isabela	West	9.18	-1.02	-91.1	1	4	0.1
1792	Villamil	Oct	2003	22.8	Day	Landing	Isabela Sur	Isabela	West	9.18	-1.02	-91.1	1	4	0.45
1793	Villamil	Oct	2003	22.8	Day	Landing	Isabela Sur	Isabela	West	9.18	-1.02	-91.1	1	3	0.0666667
1794	Villamil	Oct	2003	22.8	Day	Landing	Isabela Sur	Isabela	West	9.18	-1.02	-91.1	1	3	0.2
1795	Villamil	Oct	2003	22.8	Day	Landing	Isabela Sur	Isabela	West	9.18	-1.02	-91.1	1	4	0.625
1796	Villamil	Oct	2003	22.8	Day	Landing	Isabela Sur	Isabela	West	9.18	-1.02	-91.1	1	15	0.18
1797	Villamil	Oct	2003	22.8	Day	Landing	Isabela Sur	Isabela	West	9.18	-1.02	-91.1	1	18	0.177778
1798	Villamil	Oct	2003	22.8	Day	Landing	Isabela Sur	Isabela	West	9.18	-1.02	-91.1	1	3	1.43333
1799	Villamil	Oct	2003	22.8	Day	Landing	Isabela Sur	Isabela	West	9.18	-1.02	-91.1	1	3	1.96667
1800	Villamil	Oct	2003	22.8	Day	Landing	Isabela Sur	Isabela	West	1.21	-0.978203	-90.9576	1	3	0.9
1801	Villamil	Oct	2003	22.8	Day	Landing	Isabela Sur	Isabela	West	1.21	-0.978203	-90.9576	1	3.5	1.22857
1802	Villamil	Oct	2003	22.8	Day	Landing	Isabela Sur	Isabela	West	1.21	-0.978203	-90.9576	1	3	0.0766667
1803	Villamil	Oct	2003	22.8	Day	Landing	Isabela Sur	Isabela	West	1.21	-0.978203	-90.9576	2	3	0.341667
1804	Villamil	Oct	2003	22.8	Day	Landing	Isabela Sur	Isabela	West	1.21	-0.978203	-90.9576	1	2.5	0.092
1805	Villamil	Oct	2003	22.8	Night	Landing	Isabela Sur	Isabela	West	1.21	-0.978203	-90.9576	1	3	1.83333
1806	Villamil	Oct	2003	22.8	Day	Landing	Isabela Sur	Isabela	West	1.21	-0.978203	-90.9576	1	3	2.13333
1807	Villamil	Oct	2003	22.8	Day	Landing	Isabela Sur	Isabela	West	1.21	-0.978203	-90.9576	1	3	0.6
1808	Villamil	Oct	2003	22.8	Day	Landing	Isabela Sur	Isabela	West	2.1	-0.9711	-90.9343	1	3	0.233333
1809	Villamil	Oct	2003	22.8	Day	Landing	Isabela Sur	Isabela	West	2.1	-0.9711	-90.9343	1	2	5.25
1810	Villamil	Oct	2003	22.8	Day	Landing	Isabela Sur	Isabela	West	14.9	-1.04912	-91.1846	2	8	1.59375
1811	Villamil	Oct	2003	22.8	Day	Landing	Isabela Sur	Isabela	West	14.9	-1.04912	-91.1846	1	12	2.275
1812	Villamil	Oct	2003	22.8	Day	Landing	Isabela Sur	Isabela	West	14.9	-1.04912	-91.1846	1	12	1.89167
1813	Villamil	Oct	2003	22.8	Day	Landing	Isabela Sur	Isabela	West	14.9	-1.04912	-91.1846	2	20	0.97
1814	Villamil	Oct	2003	22.8	Day	Landing	Isabela Sur	Isabela	West	14.9	-1.04912	-91.1846	1	12	0.883333
1815	Villamil	Oct	2003	22.8	Day	Landing	Isabela Sur	Isabela	West	9.22	-1.03944	-91.0943	2	4	0.225
1816	Baquerizo	Oct	2003	25	Night	Landing	Marchena	Marchena	North	100	0.640889	-90.7649	5	14	0.683
1817	Baquerizo	Nov	2003	22.7	Night	Landing	Española	Española	Centre- South	36.6	-1.3477	-89.6749	8	60	0.134375
1818	Baquerizo	Nov	2003	22.7	Night	Landing	Española	Española	Centre- South	36.6	-1.3477	-89.6749	5	20	1.3697
1819	Ayora	Nov	2003	23.7	Day	Observer	Isabela Norte y Este	Isabela	West	42.2	-0.52844	-90.9483	1	3	0.0777778
1820	Ayora	Nov	2003	23.7	Day	Observer	Isabela Norte y Este	Isabela	West	42.2	-0.62653	-90.8813	1	3	0.133333
1821	Ayora	Nov	2003	23.7	Day	Landing	Isabela Norte y Este	Isabela	West	42.2	-0.58936	-90.9423	2	13	0.297308
1822	Ayora	Nov	2003	22.5	Day	Landing	Isabela Oeste	Isabela	West	113	-0.49371	-91.2054	2	4	0.5
1823	Villamil	Nov	2003	22.5	Day	Landing	Isabela Oeste	Isabela	West	76.7	-0.43544	-91.2364	1	30	1.35
1824	Villamil	Nov	2003	22.5	Day	Landing	Isabela Oeste	Isabela	West	76.7	-0.43544	-91.2364	1	20	0.445
1825	Villamil	Nov	2003	22.5	Day	Landing	Isabela Oeste	Isabela	West	76.7	-0.43544	-91.2364	1	25	1.236
1826	Villamil	Nov	2003	22.5	Day	Landing	Isabela Oeste	Isabela	West	76.7	-0.43544	-91.2364	1	25	1.216
1827	Baquerizo	Nov	2003	22.5	Night	Landing	Isabela Oeste	Isabela	West	161	-0.65789	-91.1456	10	20	0.48
1828	Villamil	Nov	2003	22.2	Day	Landing	Isabela Sur	Isabela	West	3.7	-0.99697	-91.016	1	4	0.75
1829	Villamil	Nov	2003	22.2	Day	Landing	Isabela Sur	Isabela	West	17	-0.79173	-90.8193	1	1.5	0.6
1830	Villamil	Nov	2003	22.2	Day	Landing	Isabela Sur	Isabela	West	17	-0.79173	-90.8193	1	4	0.625
1831	Villamil	Nov	2003	22.2	Day	Landing	Isabela Sur	Isabela	West	17	-0.79173	-90.8193	2	5	0.36
1832	Villamil	Nov	2003	22.2	Day	Landing	Isabela Sur	Isabela	West	17	-0.79173	-90.8193	2	4	0.65
1833	Villamil	Nov	2003	22.2	Day	Landing	Isabela Sur	Isabela	West	4.83	-1.0041	-91.039	1	3	0.9
1834	Villamil	Nov	2003	22.2	Day	Landing	Isabela Sur	Isabela	West	4.83	-1.0041	-91.039	1	4	0.375
1835	Villamil	Nov	2003	22.2	Night	Landing	Isabela Sur	Isabela	West	4.83	-1.0041	-91.039	1	3	0.733333
1836	Villamil	Nov	2003	22.2	Day	Landing	Isabela Sur	Isabela	West	4.83	-1.0041	-91.039	2	3	0.0833333
1837	Villamil	Nov	2003	22.2	Day	Landing	Isabela Sur	Isabela	West	4.83	-1.0041	-91.039	1	3	0.0666667
1838	Villamil	Nov	2003	22.2	Day	Landing	Isabela Sur	Isabela	West	4.83	-1.0041	-91.039	1	4	1.125
1839	Villamil	Nov	2003	22.2	Day	Landing	Isabela Sur	Isabela	West	4.83	-1.0041	-91.039	2	4	0.5625
1840	Villamil	Nov	2003	22.2	Day	Landing	Isabela Sur	Isabela	West	4.83	-1.0041	-91.039	1	4	0.15
1841	Villamil	Nov	2003	22.2	Day	Landing	Isabela Sur	Isabela	West	4.83	-1.0041	-91.039	1	4	0.325
1842	Villamil	Nov	2003	22.2	Day	Landing	Isabela Sur	Isabela	West	4.83	-1.0041	-91.039	1	4	0.225
1843	Villamil	Nov	2003	22.2	Day	Landing	Isabela Sur	Isabela	West	4.83	-1.0041	-91.039	1	4	0.1
1844	Villamil	Nov	2003	22.2	Day	Landing	Isabela Sur	Isabela	West	4.83	-1.0041	-91.039	1	5	0.08
1845	Villamil	Nov	2003	22.2	Day	Landing	Isabela Sur	Isabela	West	4.83	-1.0041	-91.039	1	4	0.85
1846	Villamil	Nov	2003	22.2	Day	Landing	Isabela Sur	Isabela	West	4.83	-1.0041	-91.039	1	2	0.25
1847	Villamil	Nov	2003	22.2	Day	Landing	Isabela Sur	Isabela	West	4.83	-1.0041	-91.039	1	4	1.0225
1848	Villamil	Nov	2003	22.2	Day	Landing	Isabela Sur	Isabela	West	4.83	-1.0041	-91.039	2	4	0.3375
1849	Villamil	Nov	2003	22.2	Day	Landing	Isabela Sur	Isabela	West	4.83	-1.0041	-91.039	2	4	0.2125
1850	Villamil	Nov	2003	22.2	Day	Landing	Isabela Sur	Isabela	West	4.83	-1.0041	-91.039	1	4	0.175
1851	Villamil	Nov	2003	22.2	Day	Landing	Isabela Sur	Isabela	West	4.83	-1.0041	-91.039	1	4	0.575
1852	Villamil	Nov	2003	22.2	Day	Landing	Isabela Sur	Isabela	West	4.83	-1.0041	-91.039	1	4	1.425
1853	Villamil	Nov	2003	22.2	Day	Landing	Isabela Sur	Isabela	West	4.83	-1.0041	-91.039	1	4	0.8
1854	Villamil	Nov	2003	22.2	Day	Landing	Isabela Sur	Isabela	West	14.7	-1.05069	-91.1743	1	4	0.375
1855	Villamil	Nov	2003	22.2	Day	Landing	Isabela Sur	Isabela	West	14.7	-1.05069	-91.1743	1	4	0.85
1856	Villamil	Nov	2003	22.2	Day	Observer	Isabela Sur	Isabela	West	14.7	-0.03879	-91.1297	1	6	0.216667
1857	Villamil	Nov	2003	22.2	Day	Landing	Isabela Sur	Isabela	West	14.7	-1.05069	-91.1743	2	5	0.13
1858	Villamil	Nov	2003	22.2	Day	Landing	Isabela Sur	Isabela	West	14.7	-1.05069	-91.1743	2	4	0.475
1859	Villamil	Nov	2003	22.2	Day	Landing	Isabela Sur	Isabela	West	14.7	-1.05069	-91.1743	2	4	0.6625
1860	Villamil	Nov	2003	22.2	Day	Landing	Isabela Sur	Isabela	West	14.7	-1.05069	-91.1743	1	4	0.275
1861	Villamil	Nov	2003	22.2	Day	Landing	Isabela Sur	Isabela	West	14.7	-1.05069	-91.1743	2	4	0.025
1862	Villamil	Nov	2003	22.2	Day	Landing	Isabela Sur	Isabela	West	14.7	-1.05069	-91.1743	2	4	0.225
1863	Villamil	Nov	2003	22.2	Day	Landing	Isabela Sur	Isabela	West	0.52	-0.96708	-90.9665	1	5	0.22
1864	Villamil	Nov	2003	22.2	Day	Landing	Isabela Sur	Isabela	West	0.52	-0.96708	-90.9665	1	4	0.325
1865	Villamil	Nov	2003	22.2	Day	Landing	Isabela Sur	Isabela	West	0.52	-0.96708	-90.9665	1	4	0.45
1866	Villamil	Nov	2003	22.2	Night	Landing	Isabela Sur	Isabela	West	1.93	-0.97723	-90.988	1	4	1.075
1867	Villamil	Nov	2003	22.2	Day	Landing	Isabela Sur	Isabela	West	1.93	-0.97723	-90.988	1	4	0.05
1868	Villamil	Nov	2003	22.2	Night	Landing	Isabela Sur	Isabela	West	1.93	-0.97723	-90.988	1	4	0.625
1869	Villamil	Nov	2003	22.2	Night	Observer	Isabela Sur	Isabela	West	12.2	-1.03476	-91.1577	1	5	0.26
1870	Villamil	Nov	2003	22.2	Day	Observer	Isabela Sur	Isabela	West	12.2	-1.04718	-91.1878	1	3	0.733333
1871	Villamil	Nov	2003	22.2	Day	Observer	Isabela Sur	Isabela	West	12.2	-1.04331	-91.1629	1	7	0.385714
1872	Villamil	Nov	2003	22.2	Day	Observer	Isabela Sur	Isabela	West	12.2	-1.03745	-91.1475	1	6	0.3
1873	Villamil	Nov	2003	22.2	Day	Observer	Isabela Sur	Isabela	West	12.2	-1.09718	-91.1467	1	6	0.3
1874	Villamil	Nov	2003	22.2	Day	Landing	Isabela Sur	Isabela	West	12.2	-1.0394	-91.1467	1	15	0.3
1875	Villamil	Nov	2003	22.2	Day	Landing	Isabela Sur	Isabela	West	12.2	-1.0394	-91.1467	1	20	0.18
1876	Villamil	Nov	2003	22.2	Day	Landing	Isabela Sur	Isabela	West	12.2	-1.0394	-91.1467	1	10	2.04
1877	Villamil	Nov	2003	22.2	Day	Landing	Isabela Sur	Isabela	West	12.2	-1.0394	-91.1467	2	20	0.795
1878	Villamil	Nov	2003	22.2	Day	Observer	Isabela Sur	Isabela	West	12.2	-1.0394	-91.1467	1	10	0.61
1879	Villamil	Nov	2003	22.2	Day	Observer	Isabela Sur	Isabela	West	12.2	-1.0394	-91.1467	1	10	0.55
1880	Villamil	Nov	2003	22.2	Day	Observer	Isabela Sur	Isabela	West	12.2	-1.0394	-91.1467	1	9	0.5
1881	Villamil	Nov	2003	22.2	Day	Observer	Isabela Sur	Isabela	West	12.2	-1.0394	-91.1467	1	10	0.68
1882	Villamil	Nov	2003	22.2	Night	Observer	Isabela Sur	Isabela	West	12.2	-1.0394	-91.1467	1	3	0.166667
1883	Villamil	Nov	2003	22.2	Day	Observer	Isabela Sur	Isabela	West	12.2	-1.0394	-91.1467	1	7	0.1
1884	Villamil	Nov	2003	22.2	Day	Observer	Isabela Sur	Isabela	West	12.2	-1.0394	-91.1467	1	5	0.28
1885	Villamil	Nov	2003	22.2	Day	Landing	Isabela Sur	Isabela	West	10.5	-0.89	-90.84	1	4	1.925
1886	Villamil	Nov	2003	22.2	Day	Landing	Isabela Sur	Isabela	West	22.7	-0.72072	-90.8072	1	2	0.1
1887	Villamil	Nov	2003	22.2	Day	Landing	Isabela Sur	Isabela	West	22.7	-0.72072	-90.8072	1	2	1.1
1888	Villamil	Nov	2003	22.2	Day	Landing	Isabela Sur	Isabela	West	34.2	-0.95519	-91.461	1	30	0.106667
1889	Villamil	Nov	2003	22.2	Day	Landing	Isabela Sur	Isabela	West	34.2	-0.95519	-91.461	2	30	0.628333
1890	Villamil	Nov	2003	22.2	Day	Landing	Isabela Sur	Isabela	West	7.27	-1.0306	-90.8846	1	4	0.725
1891	Villamil	Nov	2003	22.2	Day	Landing	Isabela Sur	Isabela	West	9.18	-1.02	-91.1	1	4	0.1
1892	Villamil	Nov	2003	22.2	Day	Landing	Isabela Sur	Isabela	West	9.18	-1.02	-91.1	1	4	0.1
1893	Villamil	Nov	2003	22.2	Day	Landing	Isabela Sur	Isabela	West	9.18	-1.02	-91.1	1	3	0.833333
1894	Villamil	Nov	2003	22.2	Day	Landing	Isabela Sur	Isabela	West	9.18	-1.02	-91.1	1	4	0.35
1895	Villamil	Nov	2003	22.2	Day	Landing	Isabela Sur	Isabela	West	9.18	-1.02	-91.1	1	4	0.05
1896	Villamil	Nov	2003	22.2	Day	Landing	Isabela Sur	Isabela	West	9.18	-1.02	-91.1	1	4	0.05
1897	Villamil	Nov	2003	22.2	Day	Landing	Isabela Sur	Isabela	West	9.18	-1.02	-91.1	1	3	1.8
1898	Villamil	Nov	2003	22.2	Day	Landing	Isabela Sur	Isabela	West	9.18	-1.02	-91.1	2	3	0.3
1899	Villamil	Nov	2003	22.2	Day	Landing	Isabela Sur	Isabela	West	9.18	-1.02	-91.1	1	3	4.3
1900	Villamil	Nov	2003	22.2	Day	Landing	Isabela Sur	Isabela	West	9.18	-1.02	-91.1	1	4	0.55
1901	Villamil	Nov	2003	22.2	Day	Landing	Isabela Sur	Isabela	West	9.18	-1.02	-91.1	1	4	0.55
1902	Villamil	Nov	2003	22.2	Day	Landing	Isabela Sur	Isabela	West	9.18	-1.02	-91.1	1	4	0.775
1903	Villamil	Nov	2003	22.2	Day	Landing	Isabela Sur	Isabela	West	9.18	-1.02	-91.1	1	3	1.86667
1904	Villamil	Nov	2003	22.2	Day	Landing	Isabela Sur	Isabela	West	9.18	-1.02	-91.1	2	4	0.9875
1905	Villamil	Nov	2003	22.2	Day	Landing	Isabela Sur	Isabela	West	9.18	-1.02	-91.1	1	4	0.05
1906	Villamil	Nov	2003	22.2	Day	Landing	Isabela Sur	Isabela	West	9.18	-1.02	-91.1	1	4	1.125
1907	Villamil	Nov	2003	22.2	Day	Landing	Isabela Sur	Isabela	West	9.18	-1.02	-91.1	1	5	0.3
1908	Villamil	Nov	2003	22.2	Day	Landing	Isabela Sur	Isabela	West	9.18	-1.02	-91.1	2	5	1.09
1909	Villamil	Nov	2003	22.2	Day	Landing	Isabela Sur	Isabela	West	9.18	-1.02	-91.1	1	4	0.125
1910	Villamil	Nov	2003	22.2	Day	Landing	Isabela Sur	Isabela	West	9.18	-1.02	-91.1	1	9	0.766667
1911	Villamil	Nov	2003	22.2	Day	Landing	Isabela Sur	Isabela	West	9.18	-1.02	-91.1	1	4	0.1
1912	Villamil	Nov	2003	22.2	Day	Landing	Isabela Sur	Isabela	West	9.18	-1.02	-91.1	1	4	1.025
1913	Villamil	Nov	2003	22.2	Day	Landing	Isabela Sur	Isabela	West	9.18	-1.02	-91.1	1	4	0.175
1914	Villamil	Nov	2003	22.2	Day	Landing	Isabela Sur	Isabela	West	9.18	-1.02	-91.1	1	4	0.4
1915	Villamil	Nov	2003	22.2	Day	Landing	Isabela Sur	Isabela	West	9.18	-1.02	-91.1	1	4	0.8
1916	Villamil	Nov	2003	22.2	Day	Landing	Isabela Sur	Isabela	West	9.18	-1.02	-91.1	1	4	0.675
1917	Villamil	Nov	2003	22.2	Day	Landing	Isabela Sur	Isabela	West	9.18	-1.02	-91.1	1	3	0.233333
1918	Villamil	Nov	2003	22.2	Day	Landing	Isabela Sur	Isabela	West	9.18	-1.02	-91.1	1	4	0.45
1919	Villamil	Nov	2003	22.2	Day	Landing	Isabela Sur	Isabela	West	9.18	-1.02	-91.1	2	4	0.025
1920	Villamil	Nov	2003	22.2	Day	Landing	Isabela Sur	Isabela	West	9.18	-1.02	-91.1	1	4	0.05
1921	Villamil	Nov	2003	22.2	Day	Landing	Isabela Sur	Isabela	West	9.18	-1.02	-91.1	2	4	0.1125
1922	Villamil	Nov	2003	22.2	Day	Landing	Isabela Sur	Isabela	West	9.18	-1.02	-91.1	1	4	1.025
1923	Villamil	Nov	2003	22.2	Day	Landing	Isabela Sur	Isabela	West	1.21	-0.978203	-90.9576	1	4	0.55
1924	Villamil	Nov	2003	22.2	Day	Landing	Isabela Sur	Isabela	West	1.21	-0.978203	-90.9576	1	4	0.45
1925	Villamil	Nov	2003	22.2	Day	Landing	Isabela Sur	Isabela	West	1.21	-0.978203	-90.9576	1	3	0.5
1926	Villamil	Nov	2003	22.2	Day	Landing	Isabela Sur	Isabela	West	14.9	-1.04912	-91.1846	1	4	1.075
1927	Villamil	Nov	2003	22.2	Day	Landing	Isabela Sur	Isabela	West	14.9	-1.04912	-91.1846	1	8	0.45
1928	Villamil	Nov	2003	22.2	Day	Landing	Isabela Sur	Isabela	West	14.9	-1.04912	-91.1846	2	8	2.43125
1929	Villamil	Nov	2003	22.2	Day	Landing	Isabela Sur	Isabela	West	14.9	-1.04912	-91.1846	2	20	0.1475
1930	Villamil	Nov	2003	22.2	Day	Landing	Isabela Sur	Isabela	West	6.56	-1.01864	-91.0558	1	3	0.0666667
1931	Villamil	Nov	2003	22.2	Day	Landing	Isabela Sur	Isabela	West	6.56	-1.01864	-91.0558	1	4	0.1
1932	Villamil	Nov	2003	22.2	Day	Observer	Isabela Sur	Isabela	West	6.56	-1.04529	-91.0567	1	5	0.26
1933	Villamil	Nov	2003	22.2	Day	Landing	Isabela Sur	Isabela	West	9.22	-1.03944	-91.0943	1	4	1.2
1934	Villamil	Nov	2003	22.2	Day	Landing	Isabela Sur	Isabela	West	18	-1.0358	-91.2282	1	8	0.65
1935	Villamil	Nov	2003	22.2	Day	Landing	Isabela Sur	Isabela	West	18	-1.0358	-91.2282	1	25	0.288
1936	Villamil	Nov	2003	22.2	Day	Landing	Isabela Sur	Isabela	West	18	-1.0358	-91.2282	1	20	0.215
1937	Villamil	Nov	2003	22.2	Day	Landing	Isabela Sur	Isabela	West	18	-1.0358	-91.2282	1	4	0.85
1938	Villamil	Nov	2003	22.2	Day	Landing	Isabela Sur	Isabela	West	18	-1.0358	-91.2282	2	15	0.286667
1939	Baquerizo	Nov	2003	22.2	Night	Landing	Isabela Sur	Isabela	West	137	-0.93874	-91.4926	10	40	0.36
1940	Ayora	Nov	2003	24.8	Night	Landing	Marchena	Marchena	North	104	0.640889	-90.7649	2	7	1.03929
1941	Baquerizo	Dec	2003	23.7	Night	Landing	Española	Española	Centre- South	33	1.3434	-89.6983	2	6	0.908333
1942	Baquerizo	Dec	2003	23.7	Night	Landing	Española	Española	Centre- South	36.6	-1.3477	-89.6749	2	4	0.175
1943	Baquerizo	Dec	2003	23.7	Night	Landing	Española	Española	Centre- South	36.6	-1.3477	-89.6749	2	5	0.772
1944	Baquerizo	Dec	2003	23.3	Night	Landing	Floreana	Floreana	Centre- South	69.4	-1.29001	-90.4992	15	20	0.895333
1945	Ayora	Dec	2003	24.6	Day	Landing	Isabela Norte y Este	Isabela	West	42.2	-0.58936	-90.9423	1	10	0.091
1946	Ayora	Dec	2003	24.6	Day	Landing	Isabela Norte y Este	Isabela	West	50.3	-0.375	-90.9555	4	24	1.60938
1947	Villamil	Dec	2003	23.9	Day	Landing	Isabela Sur	Isabela	West	3.7	-0.99697	-91.016	1	4	0.05
1948	Villamil	Dec	2003	23.9	Day	Landing	Isabela Sur	Isabela	West	17	-0.79173	-90.8193	1	4	0.05
1949	Villamil	Dec	2003	23.9	Day	Landing	Isabela Sur	Isabela	West	17	-0.79173	-90.8193	1	4	0.275
1950	Villamil	Dec	2003	23.9	Day	Landing	Isabela Sur	Isabela	West	17	-0.79173	-90.8193	1	4	0.85
1951	Villamil	Dec	2003	23.9	Day	Landing	Isabela Sur	Isabela	West	17	-0.79173	-90.8193	2	4	1.25
1952	Villamil	Dec	2003	23.9	Day	Landing	Isabela Sur	Isabela	West	4.83	-1.0041	-91.039	1	4	0.975
1953	Villamil	Dec	2003	23.9	Day	Landing	Isabela Sur	Isabela	West	4.83	-1.0041	-91.039	1	4	0.225
1954	Villamil	Dec	2003	23.9	Day	Landing	Isabela Sur	Isabela	West	4.83	-1.0041	-91.039	1	4	0.125
1955	Villamil	Dec	2003	23.9	Day	Landing	Isabela Sur	Isabela	West	4.83	-1.0041	-91.039	1	4	0.175
1956	Villamil	Dec	2003	23.9	Day	Landing	Isabela Sur	Isabela	West	4.83	-1.0041	-91.039	1	4	0.05
1957	Villamil	Dec	2003	23.9	Day	Landing	Isabela Sur	Isabela	West	4.83	-1.0041	-91.039	1	4	0.05
1958	Villamil	Dec	2003	23.9	Day	Landing	Isabela Sur	Isabela	West	4.83	-1.0041	-91.039	1	3	0.3
1959	Villamil	Dec	2003	23.9	Day	Landing	Isabela Sur	Isabela	West	4.83	-1.0041	-91.039	1	4	0.175
1960	Villamil	Dec	2003	23.9	Day	Landing	Isabela Sur	Isabela	West	4.83	-1.0041	-91.039	1	4	0.05
1961	Villamil	Dec	2003	23.9	Day	Landing	Isabela Sur	Isabela	West	4.83	-1.0041	-91.039	1	3	1.43333
1962	Villamil	Dec	2003	23.9	Day	Landing	Isabela Sur	Isabela	West	0.52	-0.96708	-90.9665	1	4	0.625
1963	Villamil	Dec	2003	23.9	Day	Landing	Isabela Sur	Isabela	West	0.52	-0.96708	-90.9665	1	4	0.175
1964	Villamil	Dec	2003	23.9	Day	Landing	Isabela Sur	Isabela	West	0.52	-0.96708	-90.9665	1	4	0.05
1965	Villamil	Dec	2003	23.9	Day	Landing	Isabela Sur	Isabela	West	1.93	-0.97723	-90.988	1	4	0.175
1966	Villamil	Dec	2003	23.9	Day	Landing	Isabela Sur	Isabela	West	1.93	-0.97723	-90.988	1	4	0.05
1967	Villamil	Dec	2003	23.9	Day	Landing	Isabela Sur	Isabela	West	12.2	-1.0394	-91.1467	1	8	0.3125
1968	Villamil	Dec	2003	23.9	Day	Landing	Isabela Sur	Isabela	West	12.2	-1.0394	-91.1467	1	10	0.07
1969	Villamil	Dec	2003	23.9	Day	Observer	Isabela Sur	Isabela	West	12.2	-1.04532	-91.1756	1	4	1.925
1970	Villamil	Dec	2003	23.9	Day	Observer	Isabela Sur	Isabela	West	12.2	-1.03939	-91.1467	1	8	0.7375
1971	Villamil	Dec	2003	23.9	Day	Observer	Isabela Sur	Isabela	West	12.2	-1.03891	-91.1878	1	7	0.9
1972	Villamil	Dec	2003	23.9	Day	Observer	Isabela Sur	Isabela	West	12.2	-1.04848	-91.2403	1	8	0.675
1973	Villamil	Dec	2003	23.9	Day	Observer	Isabela Sur	Isabela	West	12.2	-1.04951	-91.1933	1	7	0.0285714
1974	Villamil	Dec	2003	23.9	Day	Observer	Isabela Sur	Isabela	West	12.2	-1.03481	-91.1843	1	10	0.22
1975	Villamil	Dec	2003	23.9	Day	Observer	Isabela Sur	Isabela	West	12.2	-1.04398	-91.1834	1	12	0.108333
1976	Villamil	Dec	2003	23.9	Day	Landing	Isabela Sur	Isabela	West	12.2	-1.0394	-91.1467	1	13	0.176923
1977	Villamil	Dec	2003	23.9	Day	Landing	Isabela Sur	Isabela	West	12.2	-1.0394	-91.1467	1	15	0.0133333
1978	Villamil	Dec	2003	23.9	Day	Landing	Isabela Sur	Isabela	West	12.2	-1.0394	-91.1467	1	4	0.225
1979	Villamil	Dec	2003	23.9	Day	Landing	Isabela Sur	Isabela	West	12.2	-1.0394	-91.1467	2	6	0.508333
1980	Villamil	Dec	2003	23.9	Day	Observer	Isabela Sur	Isabela	West	12.2	-1.0394	-91.1467	1	9	0.5
1981	Villamil	Dec	2003	23.9	Day	Observer	Isabela Sur	Isabela	West	12.2	-1.0394	-91.1467	1	8	0.5625
1982	Villamil	Dec	2003	23.9	Night	Observer	Isabela Sur	Isabela	West	12.2	-1.0394	-91.1467	1	5	0.54
1983	Villamil	Dec	2003	23.9	Day	Landing	Isabela Sur	Isabela	West	22.7	-0.72072	-90.8072	1	3.5	0.4
1984	Villamil	Dec	2003	23.9	Day	Landing	Isabela Sur	Isabela	West	22.7	-0.72072	-90.8072	1	4	0.125
1985	Villamil	Dec	2003	23.9	Day	Landing	Isabela Sur	Isabela	West	22.7	-0.72072	-90.8072	1	4	0.175
1986	Villamil	Dec	2003	23.9	Day	Landing	Isabela Sur	Isabela	West	22.7	-0.72072	-90.8072	2	5	0.16
1987	Villamil	Dec	2003	23.9	Day	Landing	Isabela Sur	Isabela	West	22.7	-0.72072	-90.8072	1	3.5	0.142857
1988	Villamil	Dec	2003	23.9	Day	Landing	Isabela Sur	Isabela	West	22.7	-0.72072	-90.8072	2	4	0.45
1989	Villamil	Dec	2003	23.9	Day	Landing	Isabela Sur	Isabela	West	22.7	-0.72072	-90.8072	1	3	0.466667
1990	Villamil	Dec	2003	23.9	Day	Landing	Isabela Sur	Isabela	West	34.2	-0.95519	-91.461	1	5	1.82
1991	Villamil	Dec	2003	23.9	Day	Landing	Isabela Sur	Isabela	West	34.2	-0.95519	-91.461	1	20	1.16
1992	Villamil	Dec	2003	23.9	Day	Landing	Isabela Sur	Isabela	West	7.27	-1.0306	-90.8846	2	4	1.075
1993	Villamil	Dec	2003	23.9	Day	Landing	Isabela Sur	Isabela	West	9.18	-1.02	-91.1	1	4	0.275
1994	Villamil	Dec	2003	23.9	Day	Landing	Isabela Sur	Isabela	West	9.18	-1.02	-91.1	2	4	0.0625
1995	Villamil	Dec	2003	23.9	Day	Landing	Isabela Sur	Isabela	West	9.18	-1.02	-91.1	2	4	0.5125
1996	Villamil	Dec	2003	23.9	Day	Landing	Isabela Sur	Isabela	West	9.18	-1.02	-91.1	1	4	0.225
1997	Villamil	Dec	2003	23.9	Day	Landing	Isabela Sur	Isabela	West	9.18	-1.02	-91.1	1	4	0.125
1998	Villamil	Dec	2003	23.9	Day	Landing	Isabela Sur	Isabela	West	9.18	-1.02	-91.1	1	4	0.575
1999	Villamil	Dec	2003	23.9	Night	Landing	Isabela Sur	Isabela	West	9.18	-1.02	-91.1	1	3	1.5
[truncated: 3,087 more rows]

## Sheet: Meta data
Variable	Mean	Units / Categories	Sources
HOME_PORT	Port of origin of fishermen. In Galapagos there are three main ports: Ayora, Baquerizo and Villamil	Ayora, Baquerizo, Villamil
MONTH	Fishing months: Fishing is done for four months a year: September to December.	Sep, Oct, Nov, Dec
YEAR	The years considered for the study: 2002 to 2008	2002,2003, 2004, 2005, 2006, 2007, 2008
SST	Sea Surface Temperature	°C	Obtained by the onboard observers and from satellite data (MODIS)
FISHING_SCHEDULE	Fishing is done during the night or during the day	kilometers
DATA_SOURCE	Fishing Monitoring System: With Observers on board and Landings	Observers, Landing
MACROZONE	The islands are divided into macrozones when there are areas of different abundance and distribution	Darwin, Española, Fernandina,Floreana, Genovesa, Isabela, Isabela Norte y Este, Isabela Oeste, Isabela Sur, Marchena, Pinta, Pinzon, Rabida, San Cristobal N y O, San Cristobal S y E, Santa Cruz, Santa Fe, Santiago, Wolf
ILAND	Islands where the fishery is carried out	Darwin, Española, Fernandina, Floreana , Genovesa, Isabela, Marchena, Pinta, Pinzón, Rábida, San Cristóbal, Santa Cruz, Santa Fe, Santiago, Wolf
REGION	Fishing Region: Galapagos was divided into three large fishing areas (Figure 1)	West, North, Centre- South
DISTANCE	Distance from the fishing site to the nearest Fishing Port	Km	Distance measured in the Google Earth, from each home port to the ground
LAT	Coordinates of latitude	Degree	Obtained by the onboard observers in situ. Fishing ground annotated througt interviews were associated to their coordenates registered for fishing observers previously.
LON	Coordinates of longitude	Degree
DIVERS	In the Galapagos Islands fishing is done with the Hooka diving modality, and the diver is the minimum sampling unit	diver
DIVING HOURS	The number of hours that divers fish for lobster	h
CPUE	Observed values of a CPUE (indicator of relative abundance)	Kg- tail / (diver x hour)
Sources: the Galapagos National Park Serivice.
