# Supplementary material for: Factors affecting relative abundance of low-mobility fishing resources: spiny lobster in the Galapagos Marine Reserve
Source: PeerJ. 2019 Jul 8;7:e7278. doi: 10.7717/peerj.7278 (PMC6622163; doi:10.7717/peerj.7278)
Supplement: Dataset S4 [file peerj-07-7278-s012.csv]

No	HOME_PORT	MONTH	YEAR	SST	FISHING_SCHEDULE	DATA_SOURCE	MACROZONE	ILAND	REGION	DISTANCE	LAT	LON	DIVERS	DIVING HOURS	CPUE
1	Ayora	Sep	2002	21.5	Night	Landing	Rabida	Rabida	Centre- South	37.2	-0.435	-90.701	2	3	0.75
2	Ayora	Sep	2002	21.5	Night	Landing	Rabida	Rabida	Centre- South	37.2	-0.435	-90.701	1	3	2.133333333
3	Ayora	Sep	2002	21.5	Night	Landing	Rabida	Rabida	Centre- South	37.2	-0.435	-90.701	2	3	0.916666667
4	Ayora	Sep	2002	21.5	Night	Landing	Rabida	Rabida	Centre- South	37.2	-0.435	-90.701	2	3	1.5
5	Ayora	Sep	2002	21.6	Day	Landing	Wolf	Wolf	North	177	1.391311	-91.829283	6	6	1.5
6	Ayora	Sep	2002	21.2	Day	Landing	Wolf	Wolf	North	177	1.391311	-91.829283	6	10	1.676666667
7	Ayora	Oct	2002	21.8	Night	Landing	Wolf	Wolf	North	177	1.391311	-91.829283	1	15	1.053333333
8	Ayora	Oct	2002	21.8	Night	Landing	Wolf	Wolf	North	177	1.391311	-91.829283	5	15	0.777333333
9	Ayora	Oct	2002	21.8	Night	Landing	Wolf	Wolf	North	177	1.391311	-91.829283	2	14	0.578571429
10	Ayora	Oct	2002	21.8	Night	Landing	Wolf	Wolf	North	177	1.391311	-91.829283	2	15	0.876666667
11	Ayora	Nov	2002	23.5	Night	Observer	Rabida	Rabida	Centre- South	37.2	-0.40335	-90.70224	2	4	1.25
12	Ayora	Nov	2002	23.5	Day	Observer	Rabida	Rabida	Centre- South	37.2	-0.40335	-90.70224	1	4	0.625
13	Baquerizo	Nov	2002	24.3	Night	Observer	Rabida	Rabida	Centre- South	89	-0.435	-90.701	2	6	0.45
14	Baquerizo	Nov	2002	24.3	Night	Observer	Rabida	Rabida	Centre- South	89	-0.435	-90.701	1	7	0.972857143
15	Baquerizo	Nov	2002	24.3	Night	Observer	Rabida	Rabida	Centre- South	89	-0.435	-90.701	1	7	1.428571429
16	Ayora	Nov	2002	23	Day	Observer	Wolf	Wolf	North	171	1.37883	-91.81915	2	2	1.375
17	Ayora	Nov	2002	23	Night	Observer	Wolf	Wolf	North	171	1.38009	-91.8218	2	5	0.75
18	Ayora	Nov	2002	23.1	Night	Observer	Wolf	Wolf	North	171	1.38009	-91.8218	2	5	1.7
19	Ayora	Nov	2002	23.1	Day	Observer	Wolf	Wolf	North	171	1.38009	-91.8218	2	3	0.833333333
20	Ayora	Nov	2002	23.4	Night	Observer	Wolf	Wolf	North	171	1.37878	-91.81874	2	4	1.875
21	Ayora	Nov	2002	23.3	Night	Observer	Wolf	Wolf	North	171	1.38009	-91.8218	2	4	1.4375
22	Ayora	Nov	2002	23.3	Night	Landing	Wolf	Wolf	North	171	1.38009	-91.8218	1	4	3.5
23	Ayora	Nov	2002	23.3	Night	Landing	Wolf	Wolf	North	171	1.38009	-91.8218	2	4	1.3125
24	Ayora	Nov	2002	23.3	Night	Observer	Wolf	Wolf	North	171	1.38009	-91.8218	2	4	1.75
25	Ayora	Nov	2002	23	Night	Observer	Wolf	Wolf	North	171	1.38009	-91.8218	2	5	0.5
26	Ayora	Nov	2002	23.4	Night	Observer	Wolf	Wolf	North	171	1.37878	-91.81874	2	4	0.625
27	Ayora	Nov	2002	23.4	Night	Observer	Wolf	Wolf	North	171	1.37878	-91.81874	2	4	1.75
28	Ayora	Nov	2002	23.3	Night	Observer	Wolf	Wolf	North	171	1.38269	-91.82315	2	3	1.25
29	Ayora	Nov	2002	23.1	Night	Observer	Wolf	Wolf	North	171	1.38009	-91.8218	2	4	2.125
30	Ayora	Nov	2002	23.4	Night	Observer	Wolf	Wolf	North	171	1.37878	-91.81874	2	4	0.875
31	Ayora	Nov	2002	23.3	Night	Observer	Wolf	Wolf	North	171	1.38008	-91.82618	2	2	1.125
32	Ayora	Nov	2002	22.4	Day	Observer	Wolf	Wolf	North	177	1.391311	-91.829283	6	3	0.277777778
33	Ayora	Sep	2002	21.6	Day	Landing	Darwin	Darwin	North	184	1.500139	-91.91433	6	9	1.703703704
34	Ayora	Sep	2002	21.2	Day	Landing	Darwin	Darwin	North	184	1.500139	-91.91433	6	11	1.598484848
35	Baquerizo	Sep	2002	21.3	Night	Observer	Espa�ola	Espa�ola	Centre- South	35.4	-0.79671	-90.0531	1	8	0.945833333
36	Baquerizo	Sep	2002	21.3	Night	Observer	Espa�ola	Espa�ola	Centre- South	35.4	-1.36813	-89.7406	1	7	2.328571429
37	Baquerizo	Sep	2002	21.3	Night	Landing	Espa�ola	Espa�ola	Centre- South	36.6	-1.3477	-89.6749	2	6	0.402777778
38	Villamil	Sep	2002	20.4	Day	Landing	Floreana	Floreana	Centre- South	49.2	-1.258573	-90.3642	1	30	2.683333333
39	Villamil	Sep	2002	20.4	Day	Landing	Floreana	Floreana	Centre- South	33.7	-1.2301	-90.4723	1	40	0.9525
40	Baquerizo	Sep	2002	20.4	Day	Observer	Floreana	Floreana	Centre- South	57.7	-1.31778845	-90.3343269	1	5	0.362
41	Baquerizo	Sep	2002	20.4	Day	Observer	Floreana	Floreana	Centre- South	57.7	-1.31778845	-90.3343269	1	6	0.226666667
42	Baquerizo	Sep	2002	20.4	Night	Observer	Floreana	Floreana	Centre- South	71.8	-1.319433	-90.50901	1	3	3.323333333
43	Baquerizo	Sep	2002	20.4	Night	Observer	Floreana	Floreana	Centre- South	71.8	-1.319433	-90.50901	1	4	0.225
44	Baquerizo	Sep	2002	20.4	Day	Observer	Floreana	Floreana	Centre- South	71.8	-1.319433	-90.50901	2	5	0.608
45	Baquerizo	Sep	2002	20.4	Day	Observer	Floreana	Floreana	Centre- South	71.8	-1.319433	-90.50901	1	5	1.994
46	Baquerizo	Sep	2002	20.4	Day	Observer	Floreana	Floreana	Centre- South	71.8	-1.319433	-90.50901	1	6	2.72
47	Baquerizo	Sep	2002	20.4	Day	Observer	Floreana	Floreana	Centre- South	71.8	-1.319433	-90.50901	2	3	1.965
48	Baquerizo	Sep	2002	20.4	Night	Observer	Floreana	Floreana	Centre- South	65.2	-1.23613	-90.47988	1	6	1.435
49	Baquerizo	Sep	2002	20.4	Night	Observer	Floreana	Floreana	Centre- South	65.2	-1.23613	-90.47988	1	8	1.0775
50	Baquerizo	Sep	2002	20.4	Day	Observer	Floreana	Floreana	Centre- South	69.7	-1.30332	-90.38458	1	8	0.4525
51	Baquerizo	Sep	2002	20.4	Day	Observer	Floreana	Floreana	Centre- South	69.7	-1.30332	-90.38458	2	5	0.272
52	Baquerizo	Sep	2002	20.4	Night	Observer	Floreana	Floreana	Centre- South	65.2	-1.2364	-90.48071	1	5	1.994
53	Baquerizo	Sep	2002	20.4	Night	Observer	Floreana	Floreana	Centre- South	65.2	-1.23613	-90.47988	2	4	1.13375
54	Baquerizo	Sep	2002	20.4	Day	Observer	Floreana	Floreana	Centre- South	65.2	-1.23613	-90.47988	1	3	0.3
55	Baquerizo	Sep	2002	20.4	Night	Observer	Floreana	Floreana	Centre- South	63.7	-1.23131	-90.47753	2	4	1.36
56	Baquerizo	Sep	2002	20.4	Day	Observer	Floreana	Floreana	Centre- South	69.7	-1.30332	-90.38458	2	5	0.181
57	Baquerizo	Sep	2002	20.4	Night	Observer	Floreana	Floreana	Centre- South	69.7	-1.35567	-90.46295	1	4	1.1325
58	Baquerizo	Sep	2002	20.4	Day	Observer	Floreana	Floreana	Centre- South	69.7	-1.30332	-90.38458	1	5	2.176
59	Baquerizo	Sep	2002	20.4	Day	Observer	Floreana	Floreana	Centre- South	69.7	-1.36157	-90.45512	1	7	2.591428571
60	Baquerizo	Sep	2002	20.4	Day	Observer	Floreana	Floreana	Centre- South	69.7	-1.35376	-90.46747	1	6	1.661666667
61	Baquerizo	Sep	2002	20.4	Day	Observer	Floreana	Floreana	Centre- South	71.8	-1.319433	-90.50901	2	4	1.24625
62	Baquerizo	Sep	2002	20.4	Night	Observer	Floreana	Floreana	Centre- South	60.5			1	4	2.2675
63	Baquerizo	Sep	2002	20.4	Day	Observer	Floreana	Floreana	Centre- South	69.7	-1.35954	-90.44461	1	5	2.902
64	Baquerizo	Sep	2002	20.4	Day	Observer	Floreana	Floreana	Centre- South	69.7	-1.36213	-90.45431	1	5	2.902
65	Baquerizo	Sep	2002	20.4	Day	Observer	Floreana	Floreana	Centre- South	69.7	-1.359225	-90.44484	2	6	1.133333333
66	Baquerizo	Sep	2002	20.4	Day	Observer	Floreana	Floreana	Centre- South	57.7	-1.31778845	-90.3343269	1	6	0.755
67	Baquerizo	Sep	2002	20.4	Day	Observer	Floreana	Floreana	Centre- South	60.4	-1.3141	-90.3769	1	5	1.178
68	Baquerizo	Sep	2002	20.4	Day	Observer	Floreana	Floreana	Centre- South	60.4	-1.30802	-90.3733	1	4	4.42
69	Baquerizo	Sep	2002	20.4	Day	Observer	Floreana	Floreana	Centre- South	60.4	-1.308169	-90.373304	2	4	1.025
70	Baquerizo	Sep	2002	20.4	Day	Observer	Floreana	Floreana	Centre- South	60.4	-1.2919	-90.35846	1	5	1.994
71	Baquerizo	Sep	2002	20.4	Day	Observer	Floreana	Floreana	Centre- South	71.8	-1.30224	-90.50387	2	5	0.997
72	Baquerizo	Sep	2002	20.4	Night	Observer	Floreana	Floreana	Centre- South	71.8	-1.319433	-90.50901	1	4	2.38
73	Baquerizo	Sep	2002	20.4	Night	Observer	Floreana	Floreana	Centre- South	71.8	-1.30183	-90.50505	1	4	2.72
74	Baquerizo	Sep	2002	20.4	Night	Observer	Floreana	Floreana	Centre- South	71.8	-1.319433	-90.50901	1	3	0.906666667
75	Baquerizo	Sep	2002	20.4	Day	Observer	Floreana	Floreana	Centre- South	63.7	-1.2301	-90.4723	1	4	2.2675
76	Baquerizo	Sep	2002	20.4	Night	Observer	Floreana	Floreana	Centre- South	63.7	-1.23023	-90.475	2	6	1.738333333
77	Baquerizo	Sep	2002	20.4	Night	Landing	Floreana	Floreana	Centre- South	69.2	-1.2881	-90.4968	1	4	1.5
78	Baquerizo	Sep	2002	20.4	Night	Observer	Floreana	Floreana	Centre- South	69.4	-1.29001	-90.4992	2	5	2.95
79	Baquerizo	Sep	2002	20.4	Night	Observer	Floreana	Floreana	Centre- South	69.4	-1.29001	-90.4992	2	5	3.22
80	Baquerizo	Sep	2002	20.4	Night	Observer	Floreana	Floreana	Centre- South	60.5	-1.27589	-90.03904	1	5	1.08
81	Baquerizo	Sep	2002	20.4	Night	Landing	Floreana	Floreana	Centre- South	60.4	-1.3141	-90.3769	1	5	1.44
82	Baquerizo	Sep	2002	20.4	Day	Observer	Floreana	Floreana	Centre- South	69.7	-1.30332	-90.38458	5	16	0.98775
83	Ayora	Sep	2002	23.9	Day	Landing	Genovesa	Genovesa	North	71.1	0.3123	-89.9583	9	8	3.370833333
84	Baquerizo	Sep	2002	23.9	Day	Landing	Genovesa	Genovesa	North	86.6	0.3123	-89.9583	1	7	1.614285714
85	Baquerizo	Sep	2002	23.9	Night	Landing	Genovesa	Genovesa	North	86.6	0.3123	-89.9583	1	6	1.7
86	Baquerizo	Sep	2002	23.9	Night	Landing	Genovesa	Genovesa	North	86.6	0.3123	-89.9583	1	4	5.365
87	Ayora	Sep	2002	22.5	Day	Observer	Isabela Norte y Este	Isabela	West	36	-0.73991	-90.79762	1	4	0.125
88	Ayora	Sep	2002	22.5	Day	Observer	Isabela Norte y Este	Isabela	West	42.2	-0.60311	-90.9571	1	4	0.041666667
89	Ayora	Sep	2002	22.5	Day	Observer	Isabela Norte y Este	Isabela	West	37.4	-0.62526	-90.87685	1	4	0.125
90	Ayora	Sep	2002	22.5	Day	Observer	Isabela Norte y Este	Isabela	West	42.2	-0.60304	-90.9081	2	4	0.875
91	Ayora	Sep	2002	22.5	Day	Observer	Isabela Norte y Este	Isabela	West	42.2	-0.60304	-90.9081	2	4	0.375
92	Ayora	Sep	2002	22.5	Night	Observer	Isabela Norte y Este	Isabela	West	47.3	-0.60304	-90.9081	2	4	0.125
93	Ayora	Sep	2002	22.5	Day	Observer	Isabela Norte y Este	Isabela	West	36	-0.73991	-90.79762	2	4	0.0625
94	Ayora	Sep	2002	22.5	Night	Landing	Isabela Norte y Este	Isabela	West	90.6	0.1711	-91.3558	1	2	2.5
95	Ayora	Sep	2002	22.5	Night	Landing	Isabela Norte y Este	Isabela	West	90.6	0.1711	-91.3558	7	4	1.178571429
96	Ayora	Sep	2002	22.5	Night	Landing	Isabela Norte y Este	Isabela	West	76.9	-0.017	-91.19908	7	10	1.214285714
97	Ayora	Sep	2002	22.5	Night	Landing	Isabela Norte y Este	Isabela	West	67.5	-0.218	-91.1731	7	10	1.3
98	Ayora	Sep	2002	22.5	Night	Landing	Isabela Norte y Este	Isabela	West	61.2	-0.3039	-91.0875	7	3	0.904761905
99	Ayora	Sep	2002	22.5	Night	Landing	Isabela Norte y Este	Isabela	West	50.3	-0.375	-90.9555	7	4	0.696428571
100	Ayora	Sep	2002	22.5	Day	Landing	Isabela Norte y Este	Isabela	West	90.6	0.1711	-91.3558	6	12	1.291666667
101	Ayora	Sep	2002	22.5	Day	Landing	Isabela Norte y Este	Isabela	West	67.5	-0.218	-91.1731	6	6	2.625
102	Ayora	Sep	2002	22.5	Day	Landing	Isabela Norte y Este	Isabela	West	47.3	-0.4944	-90.95	6	10	1.041666667
103	Ayora	Sep	2002	22.5	Day	Landing	Isabela Norte y Este	Isabela	West	90.6	0.1711	-91.3558	6	15	0.88
104	Villamil	Sep	2002	22.5	Day	Landing	Isabela Norte y Este	Isabela	West	40.8	-0.58936	-90.94234	1	7	0.814285714
105	Villamil	Sep	2002	22.5	Day	Landing	Isabela Norte y Este	Isabela	West	40.8	-0.58936	-90.94234	1	16	0.17
106	Villamil	Sep	2002	22.5	Day	Landing	Isabela Norte y Este	Isabela	West	93.6	0.1423	-91.3766	1	5	2.72
107	Baquerizo	Sep	2002	22.5	Night	Observer	Isabela Norte y Este	Isabela	West	129	-0.01733	-91.20829	1	6	1.813333333
108	Baquerizo	Sep	2002	22.5	Night	Observer	Isabela Norte y Este	Isabela	West	143	0.1711	-91.3558	1	6	1.586666667
109	Baquerizo	Sep	2002	22.5	Night	Observer	Isabela Norte y Este	Isabela	West	143	-0.13865	-91.32377	2	5	1.044
110	Baquerizo	Sep	2002	22.5	Night	Observer	Isabela Norte y Este	Isabela	West	129	-0.017	-91.19908	1	5	3.082
111	Baquerizo	Sep	2002	22.5	Night	Observer	Isabela Norte y Este	Isabela	West	143	0.1711	-91.3558	1	1	4.08
112	Baquerizo	Sep	2002	22.5	Night	Observer	Isabela Norte y Este	Isabela	West	129	-0.017	-91.19908	1	4	0.4525
113	Baquerizo	Sep	2002	22.5	Night	Observer	Isabela Norte y Este	Isabela	West	129	-0.01787	-91.20861	2	3	0.453333333
114	Baquerizo	Sep	2002	22.5	Night	Observer	Isabela Norte y Este	Isabela	West	143	0.1711	-91.3558	2	5	0.816
115	Baquerizo	Sep	2002	22.5	Night	Observer	Isabela Norte y Este	Isabela	West	129	-0.017	-91.19908	2	6	0.566666667
116	Baquerizo	Sep	2002	22.5	Night	Observer	Isabela Norte y Este	Isabela	West	143	0.1711	-91.3558	8	22	0.172613636
117	Baquerizo	Sep	2002	22.5	Night	Observer	Isabela Norte y Este	Isabela	West	129	-0.017	-91.19908	8	24	0.172395833
118	Villamil	Sep	2002	21.6	Day	Landing	Isabela Oeste	Isabela	West	76.7	-0.43544	-91.23636	1	30	0.589666667
119	Villamil	Sep	2002	21.6	Day	Landing	Isabela Oeste	Isabela	West	76.7	-0.43544	-91.23636	1	20	1.349
120	Villamil	Sep	2002	21.6	Day	Landing	Isabela Oeste	Isabela	West	76.7	-0.43544	-91.23636	1	39	0.530769231
121	Villamil	Sep	2002	21.6	Day	Landing	Isabela Oeste	Isabela	West	76.7	-0.43544	-91.23636	2	15	0.55
122	Villamil	Sep	2002	21.6	Day	Landing	Isabela Oeste	Isabela	West	76.7	-0.43544	-91.23636	1	4	0.35
123	Villamil	Sep	2002	21.6	Day	Landing	Isabela Oeste	Isabela	West	76.7	-0.43544	-91.23636	1	5	1.1
124	Villamil	Sep	2002	21.6	Night	Landing	Isabela Oeste	Isabela	West	76.7	-0.43544	-91.23636	1	41	0.334146341
125	Villamil	Sep	2002	21.6	Day	Landing	Isabela Oeste	Isabela	West	77.3	-0.6796825	-91.26178085	1	4	0.175
126	Villamil	Sep	2002	21.2	Night	Landing	Isabela Sur	Isabela	West	17	-0.79173	-90.81927	2	7	1.25
127	Villamil	Sep	2002	21.2	Day	Landing	Isabela Sur	Isabela	West	17	-0.79173	-90.81927	1	10	1.043
128	Villamil	Sep	2002	21.2	Day	Landing	Isabela Sur	Isabela	West	17	-0.79173	-90.81927	1	15	1.239333333
129	Villamil	Sep	2002	21.2	Day	Landing	Isabela Sur	Isabela	West	17	-0.79173	-90.81927	1	12	2.2675
130	Villamil	Sep	2002	21.2	Day	Landing	Isabela Sur	Isabela	West	4.83	-1.0041	-91.039	1	4	0.375
131	Villamil	Sep	2002	21.2	Day	Landing	Isabela Sur	Isabela	West	4.83	-1.0041	-91.039	1	3	2.2
132	Villamil	Sep	2002	21.2	Day	Landing	Isabela Sur	Isabela	West	4.83	-1.0041	-91.039	1	4	1.02
133	Villamil	Sep	2002	21.2	Day	Landing	Isabela Sur	Isabela	West	4.83	-1.0041	-91.039	1	5	1.724
134	Villamil	Sep	2002	21.2	Day	Landing	Isabela Sur	Isabela	West	4.83	-1.0041	-91.039	1	4	0.34
135	Villamil	Sep	2002	21.2	Day	Landing	Isabela Sur	Isabela	West	14.7	-1.05069	-91.17433	1	16	0.92125
136	Villamil	Sep	2002	21.2	Day	Landing	Isabela Sur	Isabela	West	14.7	-1.05069	-91.17433	1	5	0.18
137	Villamil	Sep	2002	21.2	Day	Landing	Isabela Sur	Isabela	West	14.7	-1.05069	-91.17433	1	3	2
138	Villamil	Sep	2002	21.2	Day	Landing	Isabela Sur	Isabela	West	14.7	-1.05069	-91.17433	1	3	2.116666667
139	Villamil	Sep	2002	21.2	Day	Landing	Isabela Sur	Isabela	West	14.7	-1.05069	-91.17433	1	12	1.481666667
140	Villamil	Sep	2002	21.2	Day	Landing	Isabela Sur	Isabela	West	1.93	-0.97723	-90.98803	1	3.5	0.171428571
141	Villamil	Sep	2002	21.2	Night	Landing	Isabela Sur	Isabela	West	1.93	-0.97723	-90.98803	1	3	0.756666667
142	Villamil	Sep	2002	21.2	Day	Landing	Isabela Sur	Isabela	West	12.2	-1.0394	-91.1467	1	4	0.17
143	Villamil	Sep	2002	21.2	Day	Landing	Isabela Sur	Isabela	West	12.2	-1.0394	-91.1467	1	10	0.431
144	Villamil	Sep	2002	21.2	Night	Observer	Isabela Sur	Isabela	West	12.2	-1.02824	-91.24575	2	2.5	3.9
145	Villamil	Sep	2002	21.2	Night	Observer	Isabela Sur	Isabela	West	12.2	-1.02824	-91.29575	2	2.5	3.356
146	Villamil	Sep	2002	21.2	Night	Observer	Isabela Sur	Isabela	West	12.2	-1.05417	-91.16368	2	3	5.518333333
147	Villamil	Sep	2002	21.2	Day	Landing	Isabela Sur	Isabela	West	12.2	-1.0394	-91.1467	1	15	0.378
148	Villamil	Sep	2002	21.2	Day	Observer	Isabela Sur	Isabela	West	34.2	-1.01267	-91.41306	1	3	0.766666667
149	Villamil	Sep	2002	21.2	Day	Observer	Isabela Sur	Isabela	West	34.2	-0.92011	-91.50633	1	3	3.03
150	Villamil	Sep	2002	21.2	Day	Observer	Isabela Sur	Isabela	West	34.2	-0.92011	-91.50633	1	2	1.02
151	Villamil	Sep	2002	21.2	Day	Observer	Isabela Sur	Isabela	West	34.2	-0.91959	-91.50646	1	3	0.066666667
152	Villamil	Sep	2002	21.2	Day	Observer	Isabela Sur	Isabela	West	34.2	-1.01322	-91.41949	2	3	0.033333333
153	Villamil	Sep	2002	21.2	Day	Landing	Isabela Sur	Isabela	West	34.2	-0.95519	-91.461	1	12	1.474166667
154	Villamil	Sep	2002	21.2	Day	Landing	Isabela Sur	Isabela	West	34.2	-0.95519	-91.461	1	6	0.75
155	Villamil	Sep	2002	21.2	Day	Landing	Isabela Sur	Isabela	West	34.2	-0.95519	-91.461	1	6	1.366666667
156	Villamil	Sep	2002	21.2	Day	Observer	Isabela Sur	Isabela	West	9.18	-0.95802	-90.963723	1	6.5	0.104615385
157	Villamil	Sep	2002	21.2	Day	Landing	Isabela Sur	Isabela	West	9.18	-1.02	-91.1	1	5	0.26
158	Villamil	Sep	2002	21.2	Day	Landing	Isabela Sur	Isabela	West	1.21	-0.978203	-90.95763	1	3	0.066666667
159	Villamil	Sep	2002	21.2	Day	Landing	Isabela Sur	Isabela	West	1.21	-0.978203	-90.95763	1	4	0.175
160	Villamil	Sep	2002	21.2	Night	Landing	Isabela Sur	Isabela	West	1.21	-0.978203	-90.95763	1	4	2.3325
161	Villamil	Sep	2002	21.2	Day	Landing	Isabela Sur	Isabela	West	1.21	-0.978203	-90.95763	1	4	0.5675
162	Villamil	Sep	2002	21.2	Day	Landing	Isabela Sur	Isabela	West	2.1	-0.9711	-90.9343	1	3	0.466666667
163	Villamil	Sep	2002	21.2	Night	Landing	Isabela Sur	Isabela	West	2.1	-0.9711	-90.9343	1	2.5	2.36
164	Villamil	Sep	2002	21.2	Day	Landing	Isabela Sur	Isabela	West	14.3	-0.85295	-90.78476	1	4	2.55
165	Villamil	Sep	2002	21.2	Day	Landing	Isabela Sur	Isabela	West	14.9	-1.04912	-91.18457	1	6	0.983333333
166	Villamil	Sep	2002	21.2	Day	Landing	Isabela Sur	Isabela	West	14.9	-1.04912	-91.18457	1	6	0.908333333
167	Villamil	Sep	2002	21.2	Day	Landing	Isabela Sur	Isabela	West	14.9	-1.04912	-91.18457	1	12	2.759166667
168	Villamil	Sep	2002	21.2	Night	Observer	Isabela Sur	Isabela	West	14.9	-1.04831	-91.16491	1	2.5	2.088
169	Villamil	Sep	2002	21.2	Day	Observer	Isabela Sur	Isabela	West	14.9	-1.04711	-91.16806	2	4	0.70875
170	Villamil	Sep	2002	21.2	Day	Observer	Isabela Sur	Isabela	West	14.9	-1.04716	-91.16088	1	4	0.34
171	Villamil	Sep	2002	21.2	Day	Landing	Isabela Sur	Isabela	West	14.9	-1.04912	-91.18457	1	8	0.79375
172	Villamil	Sep	2002	21.2	Day	Landing	Isabela Sur	Isabela	West	14.9	-1.04912	-91.18457	2	10	0.59
173	Villamil	Sep	2002	21.2	Day	Observer	Isabela Sur	Isabela	West	14.9	-1.0474	-91.1683	2	3	0.453333333
174	Villamil	Sep	2002	21.2	Day	Observer	Isabela Sur	Isabela	West	14.9	-1.04912	-91.18457	1	1	0.23
175	Villamil	Sep	2002	21.2	Day	Landing	Isabela Sur	Isabela	West	14.9	-1.04912	-91.18457	2	15	0.378
176	Villamil	Sep	2002	21.2	Night	Observer	Isabela Sur	Isabela	West	14.9	-1.0477	-91.20423	2	2	4.475
177	Villamil	Sep	2002	21.2	Day	Landing	Isabela Sur	Isabela	West	14.9	-1.04912	-91.18457	2	15	0.468666667
178	Villamil	Sep	2002	21.2	Day	Landing	Isabela Sur	Isabela	West	6.56	-1.01864	-91.05577	1	4	0.625
179	Villamil	Sep	2002	21.2	Day	Landing	Isabela Sur	Isabela	West	6.56	-1.01864	-91.05577	1	5	0.44
180	Villamil	Sep	2002	21.2	Day	Landing	Isabela Sur	Isabela	West	9.22	-1.03944	-91.0943	1	3	0.066666667
181	Villamil	Sep	2002	21.2	Day	Landing	Isabela Sur	Isabela	West	9.22	-1.03944	-91.0943	1	3	1.666666667
182	Villamil	Sep	2002	21.2	Day	Observer	Isabela Sur	Isabela	West	18	-1.03199	-91.22862	2	3	2.116666667
183	Villamil	Sep	2002	21.2	Day	Observer	Isabela Sur	Isabela	West	18	-1.0477	-91.20423	2	3	0.983333333
184	Villamil	Sep	2002	21.2	Day	Landing	Isabela Sur	Isabela	West	18	-1.0358	-91.2282	1	5	0.28
185	Villamil	Sep	2002	21.2	Day	Landing	Isabela Sur	Isabela	West	18	-1.0358	-91.2282	2	20	0.1975
186	Villamil	Sep	2002	21.2	Day	Landing	Isabela Sur	Isabela	West	18	-1.0358	-91.2282	1	20	0.69
187	Villamil	Sep	2002	21.2	Day	Landing	Isabela Sur	Isabela	West	18	-1.0358	-91.2282	1	12	0.019166667
188	Villamil	Sep	2002	21.2	Day	Landing	Isabela Sur	Isabela	West	18	-1.0358	-91.2282	1	12	1.658333333
189	Villamil	Sep	2002	21.2	Day	Landing	Isabela Sur	Isabela	West	18	-1.0358	-91.2282	1	20	0.905
190	Villamil	Sep	2002	21.2	Day	Landing	Isabela Sur	Isabela	West	18	-1.0358	-91.2282	1	12	0.3025
191	Villamil	Sep	2002	21.2	Day	Landing	Isabela Sur	Isabela	West	18	-1.0358	-91.2282	1	20	0.395
192	Villamil	Sep	2002	21.2	Day	Landing	Isabela Sur	Isabela	West	18	-1.0358	-91.2282	1	12	0.094166667
193	Ayora	Sep	2002	23	Night	Observer	Marchena	Marchena	North	81.3	0.34456	-90.54679	1	3	0.5
194	Ayora	Sep	2002	23	Day	Observer	Marchena	Marchena	North	86	0.36777	-90.43854	1	4	0.875
195	Ayora	Sep	2002	23	Night	Observer	Marchena	Marchena	North	81.3	0.34456	-90.54679	1	3	0.333333333
196	Ayora	Sep	2002	23	Day	Observer	Marchena	Marchena	North	86	0.36689	-90.4116	2	4	0.4375
197	Ayora	Sep	2002	23	Night	Observer	Marchena	Marchena	North	81.3	0.34456	-90.54679	2	3	1.333333333
198	Ayora	Sep	2002	23	Day	Observer	Marchena	Marchena	North	86	0.36777	-90.448554	2	3	0.083333333
199	Ayora	Sep	2002	23	Day	Observer	Marchena	Marchena	North	86	0.36689	-90.4116	2	4	0.375
200	Ayora	Sep	2002	23	Night	Observer	Marchena	Marchena	North	81.3	0.34456	-90.54679	2	3	0.083333333
201	Baquerizo	Sep	2002	23	Night	Observer	Marchena	Marchena	North	104	0.3668833	-90.4402418	1	2	2.945
202	Baquerizo	Sep	2002	23	Night	Observer	Marchena	Marchena	North	104	0.3668833	-90.4402418	2	2	0.905
203	Baquerizo	Sep	2002	23	Night	Observer	Marchena	Marchena	North	104	0.3668833	-90.4402418	8	8	0.29046875
204	Ayora	Oct	2002	23	Day	Landing	Darwin	Darwin	North	184	1.500139	-91.91433	1	20	1.325
205	Ayora	Oct	2002	23	Day	Landing	Darwin	Darwin	North	184	1.500139	-91.91433	5	20	0.789
206	Ayora	Oct	2002	23	Day	Landing	Darwin	Darwin	North	184	1.500139	-91.91433	2	20	0.4875
207	Ayora	Oct	2002	23	Day	Landing	Darwin	Darwin	North	184	1.500139	-91.91433	2	20	0.8225
208	Baquerizo	Oct	2002	22.3	Night	Landing	Espa�ola	Espa�ola	Centre- South	37.9	-1.409	-89.6251	1	5	3.628
209	Baquerizo	Oct	2002	22.3	Night	Observer	Espa�ola	Espa�ola	Centre- South	35.4	-1.36813	-89.7406	1	3	3.633333333
210	Baquerizo	Oct	2002	22.3	Night	Observer	Espa�ola	Espa�ola	Centre- South	35.4	-1.36813	-89.7406	1	5	4.36
211	Baquerizo	Oct	2002	22.3	Night	Observer	Espa�ola	Espa�ola	Centre- South	35.4	-1.36813	-89.7406	1	5	4.82
212	Baquerizo	Oct	2002	22.3	Night	Landing	Espa�ola	Espa�ola	Centre- South	36.6	-1.3477	-89.6749	1	5	2.26
213	Baquerizo	Oct	2002	22.3	Night	Observer	Espa�ola	Espa�ola	Centre- South	33.8	-1.20919	-89.38893	1	5	0.908
214	Baquerizo	Oct	2002	22.3	Night	Observer	Espa�ola	Espa�ola	Centre- South	33.8	-1.3467	-89.6421	1	3	2
215	Baquerizo	Oct	2002	22.3	Night	Observer	Espa�ola	Espa�ola	Centre- South	33.8	-1.3467	-89.6421	1	3	1.74
216	Ayora	Oct	2002	21.7	Day	Landing	Floreana	Floreana	Centre- South	34	-1.3141	-90.3769	1	10	2.3
217	Villamil	Oct	2002	21.7	Day	Landing	Floreana	Floreana	Centre- South	33.7	-1.2301	-90.4723	2	30	0.9675
218	Baquerizo	Oct	2002	21.7	Night	Observer	Floreana	Floreana	Centre- South	69.4	-1.29001	-90.4992	2	5	3.81
219	Baquerizo	Oct	2002	21.7	Night	Observer	Floreana	Floreana	Centre- South	60.4	-1.3141	-90.3769	2	5	3
220	Baquerizo	Oct	2002	21.7	Night	Observer	Floreana	Floreana	Centre- South	60.4	-1.3141	-90.3769	2	5	1.36
221	Baquerizo	Oct	2002	21.7	Night	Observer	Floreana	Floreana	Centre- South	60.4	-1.3141	-90.3769	2	5	2.636
222	Baquerizo	Oct	2002	21.7	Night	Observer	Floreana	Floreana	Centre- South	69.4	-1.29001	-90.4992	2	5	2.54
223	Baquerizo	Oct	2002	21.7	Night	Observer	Floreana	Floreana	Centre- South	60.4	-1.3141	-90.3769	2	5	1.72
224	Baquerizo	Oct	2002	21.7	Night	Observer	Floreana	Floreana	Centre- South	69.4	-1.27584	-90.49021	2	5	1.18
225	Baquerizo	Oct	2002	21.7	Night	Observer	Floreana	Floreana	Centre- South	60.4	-1.3141	-90.3769	1	6	0.6
226	Baquerizo	Oct	2002	21.7	Night	Observer	Floreana	Floreana	Centre- South	69.4	-1.29001	-90.4992	1	5	3.08
227	Baquerizo	Oct	2002	21.7	Night	Observer	Floreana	Floreana	Centre- South	69.4	-1.29001	-90.4992	1	3	4.366666667
228	Baquerizo	Oct	2002	21.7	Night	Observer	Floreana	Floreana	Centre- South	69.4	-1.29001	-90.4992	1	5	3.26
229	Baquerizo	Oct	2002	21.7	Night	Observer	Floreana	Floreana	Centre- South	57.7	-1.31778845	-90.3343269	1	5	3.54
230	Baquerizo	Oct	2002	21.7	Night	Observer	Floreana	Floreana	Centre- South	60.4	-1.3141	-90.3769	1	5	0.72
231	Baquerizo	Oct	2002	21.7	Night	Observer	Floreana	Floreana	Centre- South	65.2	-1.27584	-90.49021	1	6	2.266666667
232	Baquerizo	Oct	2002	21.7	Night	Observer	Floreana	Floreana	Centre- South	60.9	-1.220597	-90.427974	1	5	4
233	Baquerizo	Oct	2002	21.7	Night	Observer	Floreana	Floreana	Centre- South	69.4	-1.29001	-90.4992	1	5	4
234	Baquerizo	Oct	2002	21.7	Night	Observer	Floreana	Floreana	Centre- South	69.4	-1.29001	-90.4992	1	6	2.533333333
235	Baquerizo	Oct	2002	21.7	Night	Observer	Floreana	Floreana	Centre- South	57.7	-1.15928	-90.21401	1	6	1.515
236	Baquerizo	Oct	2002	21.7	Night	Observer	Floreana	Floreana	Centre- South	71.8	-1.18898	-90.30765	1	5	0.544
237	Baquerizo	Oct	2002	21.7	Night	Observer	Floreana	Floreana	Centre- South	57.7	-1.16363	-90.21176	1	6	1.06
238	Baquerizo	Oct	2002	21.7	Night	Observer	Floreana	Floreana	Centre- South	71.8	-1.319433	-90.50901	1	6	4.241666667
239	Baquerizo	Oct	2002	21.7	Night	Observer	Floreana	Floreana	Centre- South	69.7	-1.21226	-90.28048	1	6	1.363333333
240	Baquerizo	Oct	2002	21.7	Night	Observer	Floreana	Floreana	Centre- South	69.7	-1.2434	-90.27777	1	8	2.2725
241	Ayora	Oct	2002	22.6	Night	Observer	Isabela Norte y Este	Isabela	West	113	-0.27378	-91.62153	2	4	2.1875
242	Ayora	Oct	2002	22.6	Night	Observer	Isabela Norte y Este	Isabela	West	42.2	-0.58936	-90.94234	2	3	0.666666667
243	Ayora	Oct	2002	22.6	Day	Observer	Isabela Norte y Este	Isabela	West	59.9	-0.4191	-90.96048	2	5	0.03
244	Ayora	Oct	2002	22.6	Night	Observer	Isabela Norte y Este	Isabela	West	113	-0.2656	-91.62153	1	3	2.166666667
245	Ayora	Oct	2002	22.6	Night	Observer	Isabela Norte y Este	Isabela	West	42.2	-0.58936	-90.94234	1	6	0.083333333
246	Ayora	Oct	2002	22.6	Night	Landing	Isabela Norte y Este	Isabela	West	47.3	-0.4944	-90.95	1	10	1.99
247	Ayora	Oct	2002	22.6	Night	Landing	Isabela Norte y Este	Isabela	West	50.3	-0.375	-90.9555	1	10	1.2
248	Ayora	Oct	2002	22.6	Night	Observer	Isabela Norte y Este	Isabela	West	42.2	-0.58936	-90.94234	3	3	0.5
249	Ayora	Oct	2002	22.6	Day	Observer	Isabela Norte y Este	Isabela	West	59.9	-0.42424	-90.95111	3	5	0.02
250	Ayora	Oct	2002	22.6	Night	Observer	Isabela Norte y Este	Isabela	West	113	0.271987	-91.625395	3	3	2.666666667
251	Ayora	Oct	2002	22	Night	Observer	Isabela Oeste	Isabela	West	128	-0.26002	-91.37153	2	4	0.375
252	Ayora	Oct	2002	22	Day	Observer	Isabela Oeste	Isabela	West	46.8	-0.55177	-90.85786	2	3	0.083333333
253	Ayora	Oct	2002	22	Night	Observer	Isabela Oeste	Isabela	West	128	-0.26755	-91.37245	1	4	1.25
254	Ayora	Oct	2002	22	Day	Observer	Isabela Oeste	Isabela	West	46.8	-0.5488	-90.85667	1	3	0.5
255	Ayora	Oct	2002	22	Night	Observer	Isabela Oeste	Isabela	West	128	-0.26409	-91.37233	3	4	0.666666667
256	Villamil	Oct	2002	22	Day	Landing	Isabela Oeste	Isabela	West	76.7	-0.43544	-91.23636	1	3	0.966666667
257	Villamil	Oct	2002	22	Day	Landing	Isabela Oeste	Isabela	West	76.7	-0.43544	-91.23636	2	20	0.669
258	Villamil	Oct	2002	22	Day	Landing	Isabela Oeste	Isabela	West	43.5	-0.84428	-91.48734	1	3	1.133333333
259	Baquerizo	Oct	2002	22	Night	Observer	Isabela Oeste	Isabela	West	157	-0.74136	-91.3916	1	6	1.06
260	Baquerizo	Oct	2002	22	Night	Observer	Isabela Oeste	Isabela	West	157	-1.17605	-90.21556	1	5	1.818
261	Baquerizo	Oct	2002	22	Night	Observer	Isabela Oeste	Isabela	West	157	-0.74136	-91.3916	1	4	3.5225
262	Baquerizo	Oct	2002	22	Night	Observer	Isabela Oeste	Isabela	West	157	-0.74136	-91.3916	1	6	2.801666667
263	Villamil	Oct	2002	21.6	Day	Landing	Isabela Sur	Isabela	West	3.7	-0.99697	-91.01602	2	5	0.136
264	Villamil	Oct	2002	21.6	Day	Landing	Isabela Sur	Isabela	West	3.7	-0.99697	-91.01602	1	6	0.075
265	Villamil	Oct	2002	21.6	Day	Landing	Isabela Sur	Isabela	West	3.7	-0.99697	-91.01602	1	4.5	0.1
266	Villamil	Oct	2002	21.6	Day	Landing	Isabela Sur	Isabela	West	17	-0.79173	-90.81927	1	10	1.043
267	Villamil	Oct	2002	21.6	Day	Landing	Isabela Sur	Isabela	West	17	-0.79173	-90.81927	1	6	1.436666667
268	Villamil	Oct	2002	21.6	Day	Landing	Isabela Sur	Isabela	West	17	-0.79173	-90.81927	1	3	0.15
269	Villamil	Oct	2002	21.6	Day	Landing	Isabela Sur	Isabela	West	17	-0.79173	-90.81927	1	10	0.068
270	Villamil	Oct	2002	21.6	Day	Landing	Isabela Sur	Isabela	West	17	-0.79173	-90.81927	1	8	1.105
271	Villamil	Oct	2002	21.6	Day	Landing	Isabela Sur	Isabela	West	17	-0.79173	-90.81927	1	3	1.5
272	Villamil	Oct	2002	21.6	Day	Landing	Isabela Sur	Isabela	West	4.83	-1.0041	-91.039	2	5	0.18
273	Villamil	Oct	2002	21.6	Day	Landing	Isabela Sur	Isabela	West	4.83	-1.0041	-91.039	1	3	0.076666667
274	Villamil	Oct	2002	21.6	Day	Landing	Isabela Sur	Isabela	West	4.83	-1.0041	-91.039	2	4	0.17
275	Villamil	Oct	2002	21.6	Day	Landing	Isabela Sur	Isabela	West	4.83	-1.0041	-91.039	1	2	0.115
276	Villamil	Oct	2002	21.6	Day	Landing	Isabela Sur	Isabela	West	4.83	-1.0041	-91.039	1	3.5	1.037142857
277	Villamil	Oct	2002	21.6	Day	Landing	Isabela Sur	Isabela	West	4.83	-1.0041	-91.039	2	5	0.045
278	Villamil	Oct	2002	21.6	Day	Landing	Isabela Sur	Isabela	West	4.83	-1.0041	-91.039	1	3.5	1.037142857
279	Villamil	Oct	2002	21.6	Day	Landing	Isabela Sur	Isabela	West	4.83	-1.0041	-91.039	1	3.5	0.777142857
280	Villamil	Oct	2002	21.6	Night	Landing	Isabela Sur	Isabela	West	4.83	-1.0041	-91.039	1	2	1.135
281	Villamil	Oct	2002	21.6	Day	Landing	Isabela Sur	Isabela	West	4.83	-1.0041	-91.039	1	5	1.452
282	Villamil	Oct	2002	21.6	Day	Landing	Isabela Sur	Isabela	West	4.83	-1.0041	-91.039	1	4	0.2275
283	Villamil	Oct	2002	21.6	Day	Landing	Isabela Sur	Isabela	West	4.83	-1.0041	-91.039	1	4.5	0.1
284	Villamil	Oct	2002	21.6	Day	Landing	Isabela Sur	Isabela	West	4.83	-1.0041	-91.039	1	4	0.2275
285	Villamil	Oct	2002	21.6	Day	Landing	Isabela Sur	Isabela	West	4.83	-1.0041	-91.039	1	5	0.182
286	Villamil	Oct	2002	21.6	Day	Landing	Isabela Sur	Isabela	West	4.83	-1.0041	-91.039	1	4	0.17
287	Villamil	Oct	2002	21.6	Day	Landing	Isabela Sur	Isabela	West	4.83	-1.0041	-91.039	1	5	0.136
288	Villamil	Oct	2002	21.6	Day	Landing	Isabela Sur	Isabela	West	4.83	-1.0041	-91.039	2	5	0.068
289	Villamil	Oct	2002	21.6	Day	Landing	Isabela Sur	Isabela	West	4.83	-1.0041	-91.039	1	3	0.68
290	Villamil	Oct	2002	21.6	Day	Landing	Isabela Sur	Isabela	West	4.83	-1.0041	-91.039	1	4	0.17
291	Villamil	Oct	2002	21.6	Day	Landing	Isabela Sur	Isabela	West	4.83	-1.0041	-91.039	1	3	1.966666667
292	Villamil	Oct	2002	21.6	Day	Landing	Isabela Sur	Isabela	West	4.83	-1.0041	-91.039	1	4	0.5675
293	Villamil	Oct	2002	21.6	Day	Landing	Isabela Sur	Isabela	West	4.83	-1.0041	-91.039	1	5	0.09
294	Villamil	Oct	2002	21.6	Day	Landing	Isabela Sur	Isabela	West	4.83	-1.0041	-91.039	1	3	0.376666667
295	Villamil	Oct	2002	21.6	Day	Landing	Isabela Sur	Isabela	West	4.83	-1.0041	-91.039	1	3	1.513333333
296	Villamil	Oct	2002	21.6	Day	Landing	Isabela Sur	Isabela	West	4.83	-1.0041	-91.039	1	3	0.756666667
297	Villamil	Oct	2002	21.6	Day	Landing	Isabela Sur	Isabela	West	4.83	-1.0041	-91.039	1	5	1.406
298	Villamil	Oct	2002	21.6	Day	Landing	Isabela Sur	Isabela	West	4.83	-1.0041	-91.039	1	5	0.862
299	Villamil	Oct	2002	21.6	Day	Observer	Isabela Sur	Isabela	West	4.83	-0.97961	-91.00217	1	3	0.226666667
300	Villamil	Oct	2002	21.6	Day	Landing	Isabela Sur	Isabela	West	4.83	-1.0041	-91.039	1	4	1.135
301	Villamil	Oct	2002	21.6	Day	Landing	Isabela Sur	Isabela	West	14.7	-1.05069	-91.17433	1	10	1.769
302	Villamil	Oct	2002	21.6	Day	Landing	Isabela Sur	Isabela	West	14.7	-1.05069	-91.17433	1	4	1.475
303	Villamil	Oct	2002	21.6	Day	Landing	Isabela Sur	Isabela	West	14.7	-1.05069	-91.17433	1	12	1.134166667
304	Villamil	Oct	2002	21.6	Day	Landing	Isabela Sur	Isabela	West	14.7	-1.05069	-91.17433	2	5	0.272
305	Villamil	Oct	2002	21.6	Day	Landing	Isabela Sur	Isabela	West	14.7	-1.05069	-91.17433	2	13	0.610384615
306	Villamil	Oct	2002	21.6	Day	Landing	Isabela Sur	Isabela	West	14.7	-1.05069	-91.17433	1	4	0.4525
307	Villamil	Oct	2002	21.6	Day	Landing	Isabela Sur	Isabela	West	0.52	-0.96708	-90.9665	1	5	0.046
308	Villamil	Oct	2002	21.6	Day	Landing	Isabela Sur	Isabela	West	1.93	-0.97723	-90.98803	2	3	0.075
309	Villamil	Oct	2002	21.6	Night	Landing	Isabela Sur	Isabela	West	1.93	-0.97723	-90.98803	1	4	1.02
310	Villamil	Oct	2002	21.6	Night	Landing	Isabela Sur	Isabela	West	1.93	-0.97723	-90.98803	1	3	1.74
311	Villamil	Oct	2002	21.6	Night	Landing	Isabela Sur	Isabela	West	1.93	-0.97723	-90.98803	2	3	1.02
312	Villamil	Oct	2002	21.6	Day	Landing	Isabela Sur	Isabela	West	1.93	-0.97723	-90.98803	1	5	0.726
313	Villamil	Oct	2002	21.6	Night	Landing	Isabela Sur	Isabela	West	1.93	-0.97723	-90.98803	1	3	0.226666667
314	Villamil	Oct	2002	21.6	Day	Landing	Isabela Sur	Isabela	West	12.2	-1.0394	-91.1467	2	12	0.160416667
315	Villamil	Oct	2002	21.6	Day	Landing	Isabela Sur	Isabela	West	12.2	-1.0394	-91.1467	1	3	0.15
316	Villamil	Oct	2002	21.6	Day	Landing	Isabela Sur	Isabela	West	12.2	-1.0394	-91.1467	1	3	1.8
317	Villamil	Oct	2002	21.6	Day	Landing	Isabela Sur	Isabela	West	12.2	-1.0394	-91.1467	1	8	0.87875
318	Villamil	Oct	2002	21.6	Day	Landing	Isabela Sur	Isabela	West	12.2	-1.0394	-91.1467	1	8	0.31125
319	Villamil	Oct	2002	21.6	Day	Landing	Isabela Sur	Isabela	West	12.2	-1.0394	-91.1467	2	12	0.6425
320	Villamil	Oct	2002	21.6	Day	Landing	Isabela Sur	Isabela	West	12.2	-1.0394	-91.1467	1	6	1.058333333
321	Villamil	Oct	2002	21.6	Day	Landing	Isabela Sur	Isabela	West	12.2	-1.0394	-91.1467	2	15	0.431
322	Villamil	Oct	2002	21.6	Day	Observer	Isabela Sur	Isabela	West	12.2	-1.04117	-91.1571	1	4	1.815
323	Villamil	Oct	2002	21.6	Day	Landing	Isabela Sur	Isabela	West	12.2	-1.0394	-91.1467	2	20	0.5215
324	Villamil	Oct	2002	21.6	Day	Landing	Isabela Sur	Isabela	West	12.2	-1.0394	-91.1467	1	15	0.438666667
325	Villamil	Oct	2002	21.6	Day	Landing	Isabela Sur	Isabela	West	12.2	-1.0394	-91.1467	1	12	0.283333333
326	Villamil	Oct	2002	21.6	Day	Landing	Isabela Sur	Isabela	West	12.2	-1.0394	-91.1467	2	18	0.831388889
327	Villamil	Oct	2002	21.6	Day	Observer	Isabela Sur	Isabela	West	12.2	-1.0421	-91.15841	1	8	1.4175
328	Villamil	Oct	2002	21.6	Night	Observer	Isabela Sur	Isabela	West	12.2	-1.05308	-91.97792	1	4	1.9275
329	Villamil	Oct	2002	21.6	Day	Landing	Isabela Sur	Isabela	West	12.2	-1.0394	-91.1467	1	12	1.3225
330	Villamil	Oct	2002	21.6	Day	Landing	Isabela Sur	Isabela	West	22.7	-0.72072	-90.80723	1	5	0.046
331	Villamil	Oct	2002	21.6	Day	Landing	Isabela Sur	Isabela	West	22.7	-0.72072	-90.80723	1	4	0.17
332	Villamil	Oct	2002	21.6	Day	Landing	Isabela Sur	Isabela	West	3.1	-0.98601	-91.0037	1	2	0.115
333	Villamil	Oct	2002	21.6	Day	Landing	Isabela Sur	Isabela	West	34.2	-0.95519	-91.461	1	16	0.311875
334	Villamil	Oct	2002	21.6	Day	Landing	Isabela Sur	Isabela	West	34.2	-0.95519	-91.461	2	15	0.892
335	Villamil	Oct	2002	21.6	Day	Landing	Isabela Sur	Isabela	West	34.2	-0.95519	-91.461	1	18	1.108333333
336	Villamil	Oct	2002	21.6	Day	Landing	Isabela Sur	Isabela	West	34.2	-0.95519	-91.461	2	20	0.35725
337	Villamil	Oct	2002	21.6	Day	Landing	Isabela Sur	Isabela	West	34.2	-0.95519	-91.461	1	20	0.1245
338	Villamil	Oct	2002	21.6	Day	Landing	Isabela Sur	Isabela	West	34.2	-0.95519	-91.461	2	20	1.32925
339	Villamil	Oct	2002	21.6	Night	Landing	Isabela Sur	Isabela	West	7.27	-1.0306	-90.8846	1	3	0.83
340	Villamil	Oct	2002	21.6	Day	Landing	Isabela Sur	Isabela	West	9.18	-1.02	-91.1	1	3	0.076666667
341	Villamil	Oct	2002	21.6	Day	Landing	Isabela Sur	Isabela	West	9.18	-1.02	-91.1	1	4	0.0575
342	Villamil	Oct	2002	21.6	Day	Landing	Isabela Sur	Isabela	West	9.18	-1.02	-91.1	1	6	0.038333333
343	Villamil	Oct	2002	21.6	Day	Landing	Isabela Sur	Isabela	West	9.18	-1.02	-91.1	1	5	0.272
344	Villamil	Oct	2002	21.6	Day	Landing	Isabela Sur	Isabela	West	9.18	-1.02	-91.1	1	3	0.076666667
345	Villamil	Oct	2002	21.6	Day	Landing	Isabela Sur	Isabela	West	9.18	-1.02	-91.1	1	5	0.088
346	Villamil	Oct	2002	21.6	Day	Landing	Isabela Sur	Isabela	West	9.18	-1.02	-91.1	1	4	0.0575
347	Villamil	Oct	2002	21.6	Day	Landing	Isabela Sur	Isabela	West	9.18	-1.02	-91.1	1	5	0.77
348	Villamil	Oct	2002	21.6	Day	Landing	Isabela Sur	Isabela	West	9.18	-1.02	-91.1	1	4	0.34
349	Villamil	Oct	2002	21.6	Day	Landing	Isabela Sur	Isabela	West	9.18	-1.02	-91.1	1	4	1.53
350	Villamil	Oct	2002	21.6	Day	Landing	Isabela Sur	Isabela	West	9.18	-1.02	-91.1	1	5	0.362
351	Villamil	Oct	2002	21.6	Day	Landing	Isabela Sur	Isabela	West	9.18	-1.02	-91.1	1	4	0.68
352	Villamil	Oct	2002	21.6	Day	Landing	Isabela Sur	Isabela	West	9.18	-1.02	-91.1	1	4	3.175
353	Villamil	Oct	2002	21.6	Day	Landing	Isabela Sur	Isabela	West	9.18	-1.02	-91.1	1	4	0.2825
354	Villamil	Oct	2002	21.6	Day	Landing	Isabela Sur	Isabela	West	9.18	-1.02	-91.1	1	5	0.546
355	Villamil	Oct	2002	21.6	Day	Landing	Isabela Sur	Isabela	West	9.18	-1.02	-91.1	1	6	0.226666667
356	Villamil	Oct	2002	21.6	Day	Landing	Isabela Sur	Isabela	West	9.18	-1.02	-91.1	2	4	0.28375
357	Villamil	Oct	2002	21.6	Day	Landing	Isabela Sur	Isabela	West	9.18	-1.02	-91.1	1	4	0.7375
358	Villamil	Oct	2002	21.6	Day	Landing	Isabela Sur	Isabela	West	9.18	-1.02	-91.1	1	4	0.1125
359	Villamil	Oct	2002	21.6	Day	Landing	Isabela Sur	Isabela	West	9.18	-1.02	-91.1	1	3	0.83
360	Villamil	Oct	2002	21.6	Day	Landing	Isabela Sur	Isabela	West	9.18	-1.02	-91.1	1	4	0.6225
361	Villamil	Oct	2002	21.6	Day	Landing	Isabela Sur	Isabela	West	9.18	-1.02	-91.1	2	4	0.05625
362	Villamil	Oct	2002	21.6	Day	Landing	Isabela Sur	Isabela	West	9.18	-1.02	-91.1	1	4	0.1125
363	Villamil	Oct	2002	21.6	Day	Landing	Isabela Sur	Isabela	West	9.18	-1.02	-91.1	1	4	0.68
364	Villamil	Oct	2002	21.6	Day	Landing	Isabela Sur	Isabela	West	9.18	-1.02	-91.1	1	5	0.136
365	Villamil	Oct	2002	21.6	Day	Landing	Isabela Sur	Isabela	West	9.18	-1.02	-91.1	1	5	1.27
366	Villamil	Oct	2002	21.6	Day	Landing	Isabela Sur	Isabela	West	1.21	-0.978203	-90.95763	1	4	0.2275
367	Villamil	Oct	2002	21.6	Day	Landing	Isabela Sur	Isabela	West	1.21	-0.978203	-90.95763	1	5	0.046
368	Villamil	Oct	2002	21.6	Day	Landing	Isabela Sur	Isabela	West	1.21	-0.978203	-90.95763	1	5	0.09
369	Villamil	Oct	2002	21.6	Day	Landing	Isabela Sur	Isabela	West	1.21	-0.978203	-90.95763	1	4	0.68
370	Villamil	Oct	2002	21.6	Day	Landing	Isabela Sur	Isabela	West	1.21	-0.978203	-90.95763	1	5	0.318
371	Villamil	Oct	2002	21.6	Day	Landing	Isabela Sur	Isabela	West	1.21	-0.978203	-90.95763	2	4	0.48125
372	Villamil	Oct	2002	21.6	Day	Landing	Isabela Sur	Isabela	West	1.21	-0.978203	-90.95763	1	5	1.134
373	Villamil	Oct	2002	21.6	Day	Landing	Isabela Sur	Isabela	West	1.21	-0.978203	-90.95763	1	5	0.09
374	Villamil	Oct	2002	21.6	Day	Landing	Isabela Sur	Isabela	West	1.21	-0.978203	-90.95763	1	5	0.136
375	Villamil	Oct	2002	21.6	Day	Landing	Isabela Sur	Isabela	West	1.21	-0.978203	-90.95763	2	4	0.36875
376	Villamil	Oct	2002	21.6	Day	Landing	Isabela Sur	Isabela	West	1.21	-0.978203	-90.95763	2	4	0.05625
377	Villamil	Oct	2002	21.6	Night	Landing	Isabela Sur	Isabela	West	1.21	-0.978203	-90.95763	1	3	1.283333333
378	Villamil	Oct	2002	21.6	Day	Landing	Isabela Sur	Isabela	West	1.21	-0.978203	-90.95763	1	4.5	1.057777778
379	Villamil	Oct	2002	21.6	Day	Landing	Isabela Sur	Isabela	West	2.1	-0.9711	-90.9343	1	4	0.6225
380	Villamil	Oct	2002	21.6	Night	Landing	Isabela Sur	Isabela	West	2.1	-0.9711	-90.9343	1	3	2.42
381	Villamil	Oct	2002	21.6	Day	Landing	Isabela Sur	Isabela	West	2.1	-0.9711	-90.9343	1	4	0.2175
382	Villamil	Oct	2002	21.6	Day	Landing	Isabela Sur	Isabela	West	2.1	-0.9711	-90.9343	1	3	0.453333333
383	Villamil	Oct	2002	21.6	Day	Landing	Isabela Sur	Isabela	West	2.1	-0.9711	-90.9343	1	5	0.272
384	Villamil	Oct	2002	21.6	Day	Landing	Isabela Sur	Isabela	West	2.1	-0.9711	-90.9343	1	4	0.9075
385	Villamil	Oct	2002	21.6	Night	Landing	Isabela Sur	Isabela	West	2.1	-0.9711	-90.9343	2	2	1.5875
386	Villamil	Oct	2002	21.6	Night	Landing	Isabela Sur	Isabela	West	2.1	-0.9711	-90.9343	1	4	1.025
387	Villamil	Oct	2002	21.6	Day	Landing	Isabela Sur	Isabela	West	2.1	-0.9711	-90.9343	1	3	0.076666667
388	Villamil	Oct	2002	21.6	Day	Landing	Isabela Sur	Isabela	West	2.1	-0.9711	-90.9343	2	4	0.19875
389	Villamil	Oct	2002	21.6	Day	Landing	Isabela Sur	Isabela	West	2.1	-0.9711	-90.9343	2	4	0.255
390	Villamil	Oct	2002	21.6	Day	Landing	Isabela Sur	Isabela	West	14.9	-1.04912	-91.18457	1	6	1.965
391	Villamil	Oct	2002	21.6	Day	Landing	Isabela Sur	Isabela	West	14.9	-1.04912	-91.18457	2	5	0.181
392	Villamil	Oct	2002	21.6	Day	Landing	Isabela Sur	Isabela	West	14.9	-1.04912	-91.18457	2	8	0.991875
393	Villamil	Oct	2002	21.6	Day	Landing	Isabela Sur	Isabela	West	14.9	-1.04912	-91.18457	2	10	0.329
394	Villamil	Oct	2002	21.6	Night	Landing	Isabela Sur	Isabela	West	14.9	-1.04912	-91.18457	1	3	0.376666667
395	Villamil	Oct	2002	21.6	Day	Landing	Isabela Sur	Isabela	West	14.9	-1.04912	-91.18457	2	18	0.863888889
396	Villamil	Oct	2002	21.6	Day	Landing	Isabela Sur	Isabela	West	14.9	-1.04912	-91.18457	2	6	1.965
397	Villamil	Oct	2002	21.6	Day	Landing	Isabela Sur	Isabela	West	14.9	-1.04912	-91.18457	2	9	0.881666667
398	Villamil	Oct	2002	21.6	Day	Landing	Isabela Sur	Isabela	West	14.9	-1.04912	-91.18457	1	25	0.8888
399	Villamil	Oct	2002	21.6	Day	Landing	Isabela Sur	Isabela	West	14.9	-1.04912	-91.18457	2	15	1.111
400	Villamil	Oct	2002	21.6	Day	Landing	Isabela Sur	Isabela	West	14.9	-1.04912	-91.18457	1	15	0.574666667
401	Villamil	Oct	2002	21.6	Night	Landing	Isabela Sur	Isabela	West	14.9	-1.04912	-91.18457	2	3	0.301666667
402	Villamil	Oct	2002	21.6	Night	Landing	Isabela Sur	Isabela	West	33	-0.98813	-91.45704	2	3	1.436666667
403	Villamil	Oct	2002	21.6	Day	Landing	Isabela Sur	Isabela	West	6.56	-1.01864	-91.05577	1	5	0.272
404	Villamil	Oct	2002	21.6	Day	Landing	Isabela Sur	Isabela	West	6.56	-1.01864	-91.05577	2	4	0.28375
405	Villamil	Oct	2002	21.6	Day	Landing	Isabela Sur	Isabela	West	6.56	-1.01864	-91.05577	2	4	0.02875
406	Villamil	Oct	2002	21.6	Day	Landing	Isabela Sur	Isabela	West	6.56	-1.01864	-91.05577	1	4	0.0575
407	Villamil	Oct	2002	21.6	Day	Landing	Isabela Sur	Isabela	West	6.56	-1.01864	-91.05577	1	4	0.4525
408	Villamil	Oct	2002	21.6	Day	Landing	Isabela Sur	Isabela	West	6.56	-1.01864	-91.05577	1	4	0.0575
409	Villamil	Oct	2002	21.6	Day	Landing	Isabela Sur	Isabela	West	6.56	-1.01864	-91.05577	1	4	0.2275
410	Villamil	Oct	2002	21.6	Day	Landing	Isabela Sur	Isabela	West	6.56	-1.01864	-91.05577	1	4	0.0575
411	Villamil	Oct	2002	21.6	Day	Landing	Isabela Sur	Isabela	West	6.56	-1.01864	-91.05577	1	4	0.2275
412	Villamil	Oct	2002	21.6	Day	Landing	Isabela Sur	Isabela	West	6.56	-1.01864	-91.05577	1	4	0.0575
413	Villamil	Oct	2002	21.6	Night	Landing	Isabela Sur	Isabela	West	8.1	-0.92	-90.85	1	4	3.175
414	Villamil	Oct	2002	21.6	Day	Landing	Isabela Sur	Isabela	West	8.1	-0.92	-90.85	1	4	0.1125
415	Villamil	Oct	2002	21.6	Day	Landing	Isabela Sur	Isabela	West	9.22	-1.03944	-91.0943	1	4	0.2825
416	Villamil	Oct	2002	21.6	Night	Landing	Isabela Sur	Isabela	West	9.22	-1.03944	-91.0943	1	4	2.04
417	Villamil	Oct	2002	21.6	Day	Landing	Isabela Sur	Isabela	West	18	-1.0358	-91.2282	2	10	0.567
418	Villamil	Oct	2002	21.6	Day	Landing	Isabela Sur	Isabela	West	18	-1.0358	-91.2282	1	5	0.908
419	Villamil	Oct	2002	21.6	Day	Landing	Isabela Sur	Isabela	West	18	-1.0358	-91.2282	2	15	0.438333333
420	Villamil	Oct	2002	21.6	Day	Landing	Isabela Sur	Isabela	West	18	-1.0358	-91.2282	1	3	1.663333333
421	Villamil	Oct	2002	21.6	Day	Observer	Isabela Sur	Isabela	West	18	-1.0469	-91.20411	1	3	0.233333333
422	Villamil	Oct	2002	21.6	Night	Landing	Isabela Sur	Isabela	West	18	-1.0358	-91.2282	1	4	1.5875
423	Villamil	Oct	2002	21.6	Day	Observer	Isabela Sur	Isabela	West	18	-1.0358	-91.2282	2	3	1.663333333
424	Villamil	Oct	2002	21.6	Day	Landing	Isabela Sur	Isabela	West	18	-1.0358	-91.2282	1	3	0.226666667
425	Villamil	Oct	2002	21.6	Day	Landing	Isabela Sur	Isabela	West	18	-1.0358	-91.2282	1	20	0.2495
426	Villamil	Oct	2002	21.6	Night	Landing	Isabela Sur	Isabela	West	18	-1.0358	-91.2282	2	3	1.436666667
427	Villamil	Oct	2002	21.6	Day	Landing	Isabela Sur	Isabela	West	18	-1.0358	-91.2282	1	3	0.603333333
428	Villamil	Oct	2002	21.6	Day	Landing	Isabela Sur	Isabela	West	18	-1.0358	-91.2282	1	3	0.15
429	Villamil	Oct	2002	21.6	Night	Landing	Isabela Sur	Isabela	West	18	-1.0358	-91.2282	1	3	2.72
430	Villamil	Oct	2002	21.6	Day	Observer	Isabela Sur	Isabela	West	18	-1.03283	-91.22543	2	3	1.738333333
431	Villamil	Oct	2002	21.6	Day	Landing	Isabela Sur	Isabela	West	18	-1.0358	-91.2282	1	3	3.25
432	Villamil	Oct	2002	21.6	Night	Landing	Isabela Sur	Isabela	West	18	-1.0358	-91.2282	2	3	1.516666667
433	Villamil	Oct	2002	21.6	Day	Landing	Isabela Sur	Isabela	West	18	-1.0358	-91.2282	1	20	0.136
434	Villamil	Oct	2002	21.6	Day	Observer	Isabela Sur	Isabela	West	18	-1.03269	-91.22436	1	3	0.756666667
435	Villamil	Oct	2002	21.6	Night	Landing	Isabela Sur	Isabela	West	18	-1.0358	-91.2282	2	2	4.195
436	Villamil	Oct	2002	21.6	Day	Landing	Isabela Sur	Isabela	West	18	-1.0358	-91.2282	1	15	0.468666667
437	Ayora	Nov	2002	22.6	Day	Observer	Darwin	Darwin	North	194	1.67443	-91.98801	2	6	0.583333333
438	Ayora	Nov	2002	22.6	Night	Observer	Darwin	Darwin	North	194	1.68113	-92.00685	2	5	1
439	Ayora	Nov	2002	22.6	Day	Observer	Darwin	Darwin	North	194	1.6817	-92.00623	2	2	0.5
440	Ayora	Nov	2002	22.6	Night	Observer	Darwin	Darwin	North	193	1.67443	-91.98801	2	4	0.625
441	Ayora	Nov	2002	22.6	Night	Observer	Darwin	Darwin	North	194	1.68113	-92.00685	2	5	1
442	Ayora	Nov	2002	22.6	Night	Observer	Darwin	Darwin	North	184	1.500139	-91.91433	6	4	0.583333333
443	Baquerizo	Nov	2002	23.2	Night	Observer	Espa�ola	Espa�ola	Centre- South	36.6	-1.21044	-89.43086	1	4	2.1575
444	Baquerizo	Nov	2002	23.2	Night	Observer	Espa�ola	Espa�ola	Centre- South	35.4	-1.36813	-89.7406	2	3	1.133333333
445	Baquerizo	Nov	2002	23.2	Night	Landing	Espa�ola	Espa�ola	Centre- South	36.6	-1.3477	-89.6749	3	22	0.583939394
446	Baquerizo	Nov	2002	23.2	Night	Landing	Espa�ola	Espa�ola	Centre- South	36.6	-1.3477	-89.6749	3	23	0.46
447	Baquerizo	Nov	2002	23.2	Night	Landing	Espa�ola	Espa�ola	Centre- South	36.6	-1.3477	-89.6749	5	60	0.2118
448	Ayora	Nov	2002	22.4	Day	Landing	Fernandina	Fernandina	West	123	-0.2965	-91.6315	6	6	0.5
449	Ayora	Nov	2002	22.4	Day	Landing	Fernandina	Fernandina	West	132	-0.282398	-91.524922	6	7	0.357142857
450	Ayora	Nov	2002	23.2	Night	Landing	Floreana	Floreana	Centre- South	34	-1.3141	-90.3769	2	4	2.7875
451	Villamil	Nov	2002	23.2	Day	Landing	Floreana	Floreana	Centre- South	33.7	-1.2301	-90.4723	1	10	0.816
452	Baquerizo	Nov	2002	23.2	Night	Landing	Floreana	Floreana	Centre- South	69.2	-1.2881	-90.4968	1	5	2.090666667
453	Baquerizo	Nov	2002	23.2	Night	Observer	Floreana	Floreana	Centre- South	71.8	-1.319433	-90.50901	1	7	1.362857143
454	Baquerizo	Nov	2002	23.2	Night	Observer	Floreana	Floreana	Centre- South	71.8	-1.1811	-90.30303	1	6	0.908333333
455	Baquerizo	Nov	2002	23.2	Night	Observer	Floreana	Floreana	Centre- South	71.8	-1.19487	-90.30629	1	4	0.795
456	Baquerizo	Nov	2002	23.2	Night	Observer	Floreana	Floreana	Centre- South	71.8	-1.319433	-90.50901	1	6	1.211666667
457	Baquerizo	Nov	2002	23.2	Night	Observer	Floreana	Floreana	Centre- South	69.7	-1.30332	-90.38458	2	5	0.636
458	Baquerizo	Nov	2002	23.2	Night	Observer	Floreana	Floreana	Centre- South	69.7	-1.30332	-90.38458	2	5	1.86
459	Baquerizo	Nov	2002	23.2	Night	Observer	Floreana	Floreana	Centre- South	60.4	-1.3141	-90.3769	2	5	1.5
460	Baquerizo	Nov	2002	23.2	Night	Observer	Floreana	Floreana	Centre- South	60.4	-1.3141	-90.3769	2	5	1.59
461	Baquerizo	Nov	2002	23.2	Night	Observer	Floreana	Floreana	Centre- South	65.2	-1.23613	-90.47988	1	5	1.62
462	Baquerizo	Nov	2002	23.2	Night	Observer	Floreana	Floreana	Centre- South	60.5	-1.29001	-90.4992	1	4	4.885
463	Baquerizo	Nov	2002	23.2	Night	Observer	Floreana	Floreana	Centre- South	71.8	-1.319433	-90.50901	2	5	1.88
464	Baquerizo	Nov	2002	23.2	Night	Observer	Floreana	Floreana	Centre- South	60.5	-1.27653	-90.48855	2	5	0.754333333
465	Baquerizo	Nov	2002	23.2	Night	Observer	Floreana	Floreana	Centre- South	63.7	-1.2301	-90.4723	1	5	2.454
466	Baquerizo	Nov	2002	23.2	Night	Observer	Floreana	Floreana	Centre- South	60.4	-1.3141	-90.3769	1	5	0.908
467	Baquerizo	Nov	2002	23.2	Night	Observer	Floreana	Floreana	Centre- South	69.7	-1.30332	-90.38458	1	5	1.9
468	Baquerizo	Nov	2002	23.2	Night	Observer	Floreana	Floreana	Centre- South	60.4	-1.23015	-90.47927	1	5	0.506666667
469	Baquerizo	Nov	2002	23.2	Night	Observer	Floreana	Floreana	Centre- South	61.7	-1.2137	-90.449	1	7	0.194285714
470	Baquerizo	Nov	2002	23.2	Night	Observer	Floreana	Floreana	Centre- South	60.4	-1.3141	-90.3769	2	5	1
471	Baquerizo	Nov	2002	23.2	Night	Observer	Floreana	Floreana	Centre- South	60.9	-1.220597	-90.427974	1	5	0.726
472	Baquerizo	Nov	2002	23.2	Night	Observer	Floreana	Floreana	Centre- South	57.7	-1.31778845	-90.3343269	1	5	0.272
473	Baquerizo	Nov	2002	23.2	Night	Observer	Floreana	Floreana	Centre- South	69.7	-1.30332	-90.38458	1	5	1.8
474	Baquerizo	Nov	2002	23.2	Night	Observer	Floreana	Floreana	Centre- South	60.4	-1.25209	-90.49077	1	4	0.5125
475	Baquerizo	Nov	2002	23.2	Night	Observer	Floreana	Floreana	Centre- South	71.8	-1.319433	-90.50901	1	5	1.272
476	Baquerizo	Nov	2002	23.2	Night	Observer	Floreana	Floreana	Centre- South	61.7	-1.2137	-90.449	1	6	0.516666667
477	Ayora	Nov	2002	24.3	Night	Observer	Isabela Norte y Este	Isabela	West	113	-0.27378	-91.62368	2	2	0.625
478	Ayora	Nov	2002	24.3	Night	Landing	Isabela Norte y Este	Isabela	West	47.3	-0.4944	-90.95	4	13	0.176923077
479	Ayora	Nov	2002	24.3	Night	Landing	Isabela Norte y Este	Isabela	West	113	0.271987	-91.625395	4	3	2.191666667
480	Ayora	Nov	2002	24.3	Night	Landing	Isabela Norte y Este	Isabela	West	76.9	-0.017	-91.19908	4	8	0.203125
481	Ayora	Nov	2002	24.3	Night	Landing	Isabela Norte y Este	Isabela	West	93.4	0.1341	-91.3921	6	7	0.80952381
482	Ayora	Nov	2002	24.3	Night	Landing	Isabela Norte y Este	Isabela	West	104	0.06442	-91.50484	6	7	1.785714286
483	Ayora	Nov	2002	24.3	Night	Landing	Isabela Norte y Este	Isabela	West	90.6	0.1711	-91.3558	6	7	0.238095238
484	Ayora	Nov	2002	24.3	Night	Landing	Isabela Norte y Este	Isabela	West	76.9	-0.017	-91.19908	6	7	1.047619048
485	Ayora	Nov	2002	24.3	Night	Landing	Isabela Norte y Este	Isabela	West	67.5	-0.218	-91.1731	6	7	0.30952381
486	Ayora	Nov	2002	24.3	Night	Observer	Isabela Norte y Este	Isabela	West	113	0.271987	-91.625395	6	2	0.25
487	Ayora	Nov	2002	24.3	Day	Landing	Isabela Norte y Este	Isabela	West	90.6	0.1711	-91.3558	6	8	0.625
488	Ayora	Nov	2002	23.7	Night	Landing	Isabela Oeste	Isabela	West	97.6	-0.74136	-91.3916	6	7	0.238095238
489	Ayora	Nov	2002	23.7	Night	Landing	Isabela Oeste	Isabela	West	103	-0.6832	-91.325	6	7	0.214285714
490	Ayora	Nov	2002	23.7	Night	Landing	Isabela Oeste	Isabela	West	113	-0.49371	-91.20542	6	7	0.714285714
491	Ayora	Nov	2002	23.7	Night	Landing	Isabela Oeste	Isabela	West	49.6	-0.37086	-91.28205	6	7	1.119047619
492	Ayora	Nov	2002	23.7	Night	Landing	Isabela Oeste	Isabela	West	114	-0.02971	-91.57567	6	7	0.952380952
493	Ayora	Nov	2002	23.7	Day	Landing	Isabela Oeste	Isabela	West	49.6	-0.37086	-91.28205	6	9	0.462962963
494	Villamil	Nov	2002	23.7	Day	Landing	Isabela Oeste	Isabela	West	76.7	-0.43544	-91.23636	2	18	2.425
495	Villamil	Nov	2002	23.7	Day	Landing	Isabela Oeste	Isabela	West	76.7	-0.43544	-91.23636	1	20	2.625
496	Villamil	Nov	2002	23.7	Day	Observer	Isabela Oeste	Isabela	West	76.7	-0.43544	-91.23636	2	3	1.216666667
497	Villamil	Nov	2002	23.7	Night	Observer	Isabela Oeste	Isabela	West	76.7	-0.43544	-91.23636	2	2	2.325
498	Villamil	Nov	2002	23.7	Day	Observer	Isabela Oeste	Isabela	West	76.7	-0.43544	-91.23636	1	3	0.9
499	Villamil	Nov	2002	23.7	Night	Observer	Isabela Oeste	Isabela	West	76.7	-0.23163	-91.14543	1	2	3.85
500	Villamil	Nov	2002	23.7	Day	Observer	Isabela Oeste	Isabela	West	75.5	-0.37086	-91.61161	2	1	0.25
501	Villamil	Nov	2002	23.7	Night	Observer	Isabela Oeste	Isabela	West	75.5	-0.37086	-91.61161	2	3	1.816666667
502	Villamil	Nov	2002	23.7	Night	Observer	Isabela Oeste	Isabela	West	75.5	-0.37086	-91.61161	2	2	2.2
503	Villamil	Nov	2002	23.7	Day	Observer	Isabela Oeste	Isabela	West	75.5	-0.37086	-91.61161	2	3	1.816666667
504	Villamil	Nov	2002	23.7	Night	Observer	Isabela Oeste	Isabela	West	75.5	-0.37086	-91.61161	1	3	0.466666667
505	Villamil	Nov	2002	23.7	Night	Observer	Isabela Oeste	Isabela	West	75.5	-0.37086	-91.61161	1	1	0.9
506	Villamil	Nov	2002	23.7	Day	Observer	Isabela Oeste	Isabela	West	75.5	-0.37086	-91.61161	1	2	0.25
507	Villamil	Nov	2002	23.7	Day	Observer	Isabela Oeste	Isabela	West	75.5	-0.37086	-91.61161	1	3	0.9
508	Villamil	Nov	2002	23.7	Night	Observer	Isabela Oeste	Isabela	West	75.5	-0.37086	-91.61161	1	3	0.3
509	Villamil	Nov	2002	23.7	Day	Observer	Isabela Oeste	Isabela	West	75.5	-0.21258	-91.16507	1	3	0.233333333
510	Villamil	Nov	2002	23.7	Day	Observer	Isabela Oeste	Isabela	West	75.5	-0.21228	-91.17598	1	3	0.233333333
511	Villamil	Nov	2002	23.7	Day	Observer	Isabela Oeste	Isabela	West	59.4	-0.6832	-91.325	2	3	0.083333333
512	Villamil	Nov	2002	23.7	Day	Observer	Isabela Oeste	Isabela	West	59.4	-0.6832	-91.325	1	3	2.566666667
513	Villamil	Nov	2002	23.7	Day	Observer	Isabela Oeste	Isabela	West	59.4	-0.6832	-91.325	1	3	0.3
514	Villamil	Nov	2002	23.7	Day	Observer	Isabela Oeste	Isabela	West	59.4	-0.26044	-91.23288	1	3	2.266666667
515	Baquerizo	Nov	2002	23.7	Night	Observer	Isabela Oeste	Isabela	West	157	-1.25209	-90.49077	2	5	0.633333333
516	Ayora	Nov	2002	23.3	Night	Landing	Isabela Sur	Isabela	West	79	-0.95519	-91.461	6	7	0.738095238
517	Ayora	Nov	2002	23.3	Night	Landing	Isabela Sur	Isabela	West	88	-0.84428	-91.48734	6	7	0.119047619
518	Villamil	Nov	2002	23.3	Day	Landing	Isabela Sur	Isabela	West	3.7	-0.99697	-91.01602	1	3	0.15
519	Villamil	Nov	2002	23.3	Day	Landing	Isabela Sur	Isabela	West	3.7	-0.99697	-91.01602	1	4	1.2
520	Villamil	Nov	2002	23.3	Night	Landing	Isabela Sur	Isabela	West	17	-0.79173	-90.81927	1	3	1.36
521	Villamil	Nov	2002	23.3	Night	Landing	Isabela Sur	Isabela	West	17	-0.79173	-90.81927	1	3	3.1
522	Villamil	Nov	2002	23.3	Day	Landing	Isabela Sur	Isabela	West	4.83	-1.0041	-91.039	1	3	0.906666667
523	Villamil	Nov	2002	23.3	Day	Landing	Isabela Sur	Isabela	West	4.83	-1.0041	-91.039	1	5	0.226
524	Villamil	Nov	2002	23.3	Day	Landing	Isabela Sur	Isabela	West	4.83	-1.0041	-91.039	1	3	0.15
525	Villamil	Nov	2002	23.3	Day	Landing	Isabela Sur	Isabela	West	4.83	-1.0041	-91.039	1	3	0.076666667
526	Villamil	Nov	2002	23.3	Day	Landing	Isabela Sur	Isabela	West	4.83	-1.0041	-91.039	1	3	1.663333333
527	Villamil	Nov	2002	23.3	Night	Landing	Isabela Sur	Isabela	West	4.83	-1.0041	-91.039	2	2	1.2475
528	Villamil	Nov	2002	23.3	Night	Landing	Isabela Sur	Isabela	West	4.83	-1.0041	-91.039	1	2	3.63
529	Villamil	Nov	2002	23.3	Night	Landing	Isabela Sur	Isabela	West	4.83	-1.0041	-91.039	1	6	0.566666667
530	Villamil	Nov	2002	23.3	Day	Landing	Isabela Sur	Isabela	West	4.83	-1.0041	-91.039	1	3	0.53
531	Villamil	Nov	2002	23.3	Day	Landing	Isabela Sur	Isabela	West	4.83	-1.0041	-91.039	2	5	0.023
532	Villamil	Nov	2002	23.3	Night	Landing	Isabela Sur	Isabela	West	4.83	-1.0041	-91.039	1	3	0.3
533	Villamil	Nov	2002	23.3	Day	Landing	Isabela Sur	Isabela	West	4.83	-1.0041	-91.039	1	4	0.175
534	Villamil	Nov	2002	23.3	Day	Landing	Isabela Sur	Isabela	West	4.83	-1.0041	-91.039	1	4	0.45
535	Villamil	Nov	2002	23.3	Day	Landing	Isabela Sur	Isabela	West	4.83	-1.0041	-91.039	1	4	0.175
536	Villamil	Nov	2002	23.3	Day	Landing	Isabela Sur	Isabela	West	4.83	-1.0041	-91.039	1	4	0.025
537	Villamil	Nov	2002	23.3	Day	Landing	Isabela Sur	Isabela	West	4.83	-1.0041	-91.039	1	4	1.075
538	Villamil	Nov	2002	23.3	Day	Landing	Isabela Sur	Isabela	West	4.83	-1.0041	-91.039	1	4	0.5
539	Villamil	Nov	2002	23.3	Day	Landing	Isabela Sur	Isabela	West	4.83	-1.0041	-91.039	1	4	1.3
540	Villamil	Nov	2002	23.3	Day	Landing	Isabela Sur	Isabela	West	4.83	-1.0041	-91.039	1	4	1.125
541	Villamil	Nov	2002	23.3	Day	Landing	Isabela Sur	Isabela	West	4.83	-1.0041	-91.039	2	4	0.025
542	Villamil	Nov	2002	23.3	Day	Landing	Isabela Sur	Isabela	West	4.83	-1.0041	-91.039	1	5	0.4
543	Villamil	Nov	2002	23.3	Day	Landing	Isabela Sur	Isabela	West	4.83	-1.0041	-91.039	1	4	0.675
544	Villamil	Nov	2002	23.3	Day	Landing	Isabela Sur	Isabela	West	4.83	-1.0041	-91.039	1	4	0.275
545	Villamil	Nov	2002	23.3	Day	Landing	Isabela Sur	Isabela	West	4.83	-1.0041	-91.039	1	4	0.35
546	Villamil	Nov	2002	23.3	Day	Landing	Isabela Sur	Isabela	West	4.83	-1.0041	-91.039	1	4	0.225
547	Villamil	Nov	2002	23.3	Night	Landing	Isabela Sur	Isabela	West	4.83	-1.0041	-91.039	1	3	1.2
548	Villamil	Nov	2002	23.3	Day	Landing	Isabela Sur	Isabela	West	14.7	-1.05069	-91.17433	1	10	2.404
549	Villamil	Nov	2002	23.3	Day	Landing	Isabela Sur	Isabela	West	14.7	-1.05069	-91.17433	1	10	1.769
550	Villamil	Nov	2002	23.3	Day	Landing	Isabela Sur	Isabela	West	14.7	-1.05069	-91.17433	1	12	0.283333333
551	Villamil	Nov	2002	23.3	Day	Landing	Isabela Sur	Isabela	West	14.7	-1.05069	-91.17433	1	12	0.741666667
552	Villamil	Nov	2002	23.3	Day	Landing	Isabela Sur	Isabela	West	14.7	-1.05069	-91.17433	1	16	0.6125
553	Villamil	Nov	2002	23.3	Day	Landing	Isabela Sur	Isabela	West	14.7	-1.05069	-91.17433	1	14	1.721428571
554	Villamil	Nov	2002	23.3	Day	Landing	Isabela Sur	Isabela	West	14.7	-1.05069	-91.17433	1	17	1.335294118
555	Villamil	Nov	2002	23.3	Day	Landing	Isabela Sur	Isabela	West	14.7	-1.05069	-91.17433	2	4	0.1125
556	Villamil	Nov	2002	23.3	Day	Landing	Isabela Sur	Isabela	West	0.52	-0.96708	-90.9665	1	4	0.2825
557	Villamil	Nov	2002	23.3	Day	Landing	Isabela Sur	Isabela	West	0.52	-0.96708	-90.9665	1	5	1.134
558	Villamil	Nov	2002	23.3	Day	Landing	Isabela Sur	Isabela	West	0.52	-0.96708	-90.9665	1	5	0.046
559	Villamil	Nov	2002	23.3	Day	Landing	Isabela Sur	Isabela	West	0.52	-0.96708	-90.9665	1	4	0.51
560	Villamil	Nov	2002	23.3	Night	Landing	Isabela Sur	Isabela	West	0.52	-0.96708	-90.9665	1	3	0.756666667
561	Villamil	Nov	2002	23.3	Day	Landing	Isabela Sur	Isabela	West	0.52	-0.96708	-90.9665	1	5	0.36
562	Villamil	Nov	2002	23.3	Night	Landing	Isabela Sur	Isabela	West	1.93	-0.97723	-90.98803	1	3	0.756666667
563	Villamil	Nov	2002	23.3	Day	Landing	Isabela Sur	Isabela	West	1.93	-0.97723	-90.98803	1	4	0.17
564	Villamil	Nov	2002	23.3	Night	Landing	Isabela Sur	Isabela	West	1.93	-0.97723	-90.98803	2	3	0.075
565	Villamil	Nov	2002	23.3	Night	Landing	Isabela Sur	Isabela	West	1.93	-0.97723	-90.98803	1	3	0.3
566	Villamil	Nov	2002	23.3	Night	Observer	Isabela Sur	Isabela	West	12.2	-0.95531	-90.96634	1	4	2.04
567	Villamil	Nov	2002	23.3	Night	Landing	Isabela Sur	Isabela	West	12.2	-1.0394	-91.1467	2	5	0.816
568	Villamil	Nov	2002	23.3	Day	Observer	Isabela Sur	Isabela	West	12.2	-1.04603	-91.15803	1	9	1.512222222
569	Villamil	Nov	2002	23.3	Day	Landing	Isabela Sur	Isabela	West	12.2	-1.0394	-91.1467	2	9	0.277222222
570	Villamil	Nov	2002	23.3	Day	Landing	Isabela Sur	Isabela	West	12.2	-1.0394	-91.1467	1	8	0.025
571	Villamil	Nov	2002	23.3	Day	Observer	Isabela Sur	Isabela	West	12.2	-1.04069	-91.15781	1	5	0.272
572	Villamil	Nov	2002	23.3	Day	Landing	Isabela Sur	Isabela	West	12.2	-1.0394	-91.1467	2	12	0.020833333
573	Villamil	Nov	2002	23.3	Day	Landing	Isabela Sur	Isabela	West	12.2	-1.0394	-91.1467	1	15	1.12
574	Villamil	Nov	2002	23.3	Day	Observer	Isabela Sur	Isabela	West	12.2	-1.04444	-91.16108	1	4	1.925
575	Villamil	Nov	2002	23.3	Day	Observer	Isabela Sur	Isabela	West	12.2	-1.03996	-91.15777	1	8	0.8
576	Villamil	Nov	2002	23.3	Day	Observer	Isabela Sur	Isabela	West	12.2	-1.0394	-91.1467	1	8	0.85
577	Villamil	Nov	2002	23.3	Day	Observer	Isabela Sur	Isabela	West	12.2	-1.05276	-91.17529	1	8	0.55
578	Villamil	Nov	2002	23.3	Night	Observer	Isabela Sur	Isabela	West	12.2	-1.03759	-91.15268	1	4	0.8
579	Villamil	Nov	2002	23.3	Day	Observer	Isabela Sur	Isabela	West	12.2	-1.0394	-91.1467	1	9	0.911111111
580	Villamil	Nov	2002	23.3	Day	Landing	Isabela Sur	Isabela	West	22.7	-0.72072	-90.80723	1	4	1.425
581	Villamil	Nov	2002	23.3	Night	Landing	Isabela Sur	Isabela	West	34.2	-0.95519	-91.461	1	2	3.175
582	Villamil	Nov	2002	23.3	Day	Landing	Isabela Sur	Isabela	West	34.2	-0.95519	-91.461	2	3	3.175
583	Villamil	Nov	2002	23.3	Night	Landing	Isabela Sur	Isabela	West	34.2	-0.95519	-91.461	1	2	2.95
584	Villamil	Nov	2002	23.3	Day	Landing	Isabela Sur	Isabela	West	34.2	-0.95519	-91.461	1	3	3.173333333
585	Villamil	Nov	2002	23.3	Night	Landing	Isabela Sur	Isabela	West	34.2	-0.95519	-91.461	1	3	6.35
586	Villamil	Nov	2002	23.3	Day	Observer	Isabela Sur	Isabela	West	34.2	-0.97731	-91.44566	1	3	1.056666667
587	Villamil	Nov	2002	23.3	Day	Landing	Isabela Sur	Isabela	West	34.2	-0.95519	-91.461	1	1	4.54
588	Villamil	Nov	2002	23.3	Day	Observer	Isabela Sur	Isabela	West	34.2	-0.94832	-91.46632	1	3	0.756666667
589	Villamil	Nov	2002	23.3	Day	Landing	Isabela Sur	Isabela	West	34.2	-0.95519	-91.461	2	3	3.401666667
590	Villamil	Nov	2002	23.3	Night	Landing	Isabela Sur	Isabela	West	34.2	-0.95519	-91.461	1	2	2.495
591	Villamil	Nov	2002	23.3	Day	Landing	Isabela Sur	Isabela	West	34.2	-0.95519	-91.461	1	3	2.42
592	Villamil	Nov	2002	23.3	Day	Landing	Isabela Sur	Isabela	West	34.2	-0.95519	-91.461	1	2	0.455
593	Villamil	Nov	2002	23.3	Day	Landing	Isabela Sur	Isabela	West	34.2	-0.95519	-91.461	2	2	2.495
594	Villamil	Nov	2002	23.3	Day	Landing	Isabela Sur	Isabela	West	34.2	-0.95519	-91.461	1	3	0.453333333
595	Villamil	Nov	2002	23.3	Day	Landing	Isabela Sur	Isabela	West	34.2	-0.95519	-91.461	1	20	0.476
596	Villamil	Nov	2002	23.3	Day	Landing	Isabela Sur	Isabela	West	34.2	-0.95519	-91.461	1	4	0.7375
597	Villamil	Nov	2002	23.3	Day	Landing	Isabela Sur	Isabela	West	34.2	-0.95519	-91.461	1	16	0.41125
598	Villamil	Nov	2002	23.3	Day	Landing	Isabela Sur	Isabela	West	34.2	-0.95519	-91.461	2	20	0.3925
599	Villamil	Nov	2002	23.3	Day	Landing	Isabela Sur	Isabela	West	34.2	-0.95519	-91.461	1	32	0.9625
600	Villamil	Nov	2002	23.3	Day	Landing	Isabela Sur	Isabela	West	34.2	-0.95519	-91.461	1	40	0.5325
601	Villamil	Nov	2002	23.3	Day	Landing	Isabela Sur	Isabela	West	34.2	-0.95519	-91.461	2	40	0.91
602	Villamil	Nov	2002	23.3	Day	Observer	Isabela Sur	Isabela	West	34.2	-0.95519	-91.461	2	3	0.533333333
603	Villamil	Nov	2002	23.3	Day	Observer	Isabela Sur	Isabela	West	34.2	-0.95519	-91.461	2	3	1.75
604	Villamil	Nov	2002	23.3	Day	Observer	Isabela Sur	Isabela	West	34.2	-0.95519	-91.461	2	3	1.75
605	Villamil	Nov	2002	23.3	Day	Observer	Isabela Sur	Isabela	West	34.2	-0.95519	-91.461	2	4	1.5375
606	Villamil	Nov	2002	23.3	Day	Observer	Isabela Sur	Isabela	West	34.2	-0.95519	-91.461	1	2	0.45
607	Villamil	Nov	2002	23.3	Night	Observer	Isabela Sur	Isabela	West	34.2	-0.95519	-91.461	1	3	1.066666667
608	Villamil	Nov	2002	23.3	Day	Observer	Isabela Sur	Isabela	West	34.2	-0.95519	-91.461	1	3	1.5
609	Villamil	Nov	2002	23.3	Day	Observer	Isabela Sur	Isabela	West	34.2	-0.95519	-91.461	1	4	0.35
610	Villamil	Nov	2002	23.3	Day	Observer	Isabela Sur	Isabela	West	34.2	-0.95519	-91.461	1	3	1.666666667
611	Villamil	Nov	2002	23.3	Day	Observer	Isabela Sur	Isabela	West	34.2	-0.95519	-91.461	1	4	0.35
612	Villamil	Nov	2002	23.3	Day	Observer	Isabela Sur	Isabela	West	34.2	-0.95519	-91.461	1	4	0.35
613	Villamil	Nov	2002	23.3	Day	Observer	Isabela Sur	Isabela	West	34.2	-0.97277	-91.44168	2	3	0.833333333
614	Villamil	Nov	2002	23.3	Day	Observer	Isabela Sur	Isabela	West	34.2	-0.95519	-91.461	1	3	0.6
615	Villamil	Nov	2002	23.3	Day	Observer	Isabela Sur	Isabela	West	34.2	-0.95519	-91.461	1	3	0.3
616	Villamil	Nov	2002	23.3	Day	Landing	Isabela Sur	Isabela	West	9.18	-1.02	-91.1	1	5	1.044
617	Villamil	Nov	2002	23.3	Day	Landing	Isabela Sur	Isabela	West	9.18	-1.02	-91.1	2	4	0.085
618	Villamil	Nov	2002	23.3	Day	Landing	Isabela Sur	Isabela	West	9.18	-1.02	-91.1	1	5	0.49
619	Villamil	Nov	2002	23.3	Day	Landing	Isabela Sur	Isabela	West	9.18	-1.02	-91.1	1	5	1.27
620	Villamil	Nov	2002	23.3	Day	Landing	Isabela Sur	Isabela	West	9.18	-1.02	-91.1	1	4	0.5675
621	Villamil	Nov	2002	23.3	Day	Landing	Isabela Sur	Isabela	West	9.18	-1.02	-91.1	1	4	0.0575
622	Villamil	Nov	2002	23.3	Day	Landing	Isabela Sur	Isabela	West	9.18	-1.02	-91.1	1	4	0.0575
623	Villamil	Nov	2002	23.3	Night	Landing	Isabela Sur	Isabela	West	9.18	-1.02	-91.1	1	4	0.95
624	Villamil	Nov	2002	23.3	Day	Landing	Isabela Sur	Isabela	West	9.18	-1.02	-91.1	1	3	0.166666667
625	Villamil	Nov	2002	23.3	Day	Landing	Isabela Sur	Isabela	West	9.18	-1.02	-91.1	1	5	0.46
626	Villamil	Nov	2002	23.3	Day	Landing	Isabela Sur	Isabela	West	9.18	-1.02	-91.1	1	4	1.25
627	Villamil	Nov	2002	23.3	Day	Landing	Isabela Sur	Isabela	West	9.18	-1.02	-91.1	1	4	0.575
628	Villamil	Nov	2002	23.3	Day	Landing	Isabela Sur	Isabela	West	1.21	-0.978203	-90.95763	1	3	2.04
629	Villamil	Nov	2002	23.3	Day	Landing	Isabela Sur	Isabela	West	1.21	-0.978203	-90.95763	1	4	0.5675
630	Villamil	Nov	2002	23.3	Day	Landing	Isabela Sur	Isabela	West	1.21	-0.978203	-90.95763	1	5	1.96
631	Villamil	Nov	2002	23.3	Day	Landing	Isabela Sur	Isabela	West	1.21	-0.978203	-90.95763	1	5	0.44
632	Villamil	Nov	2002	23.3	Day	Landing	Isabela Sur	Isabela	West	1.21	-0.978203	-90.95763	2	5	0.41
633	Villamil	Nov	2002	23.3	Day	Landing	Isabela Sur	Isabela	West	1.21	-0.978203	-90.95763	1	5	1.636
634	Villamil	Nov	2002	23.3	Day	Landing	Isabela Sur	Isabela	West	1.21	-0.978203	-90.95763	1	4	0.34
635	Villamil	Nov	2002	23.3	Day	Landing	Isabela Sur	Isabela	West	2.1	-0.9711	-90.9343	1	4	0.85
636	Villamil	Nov	2002	23.3	Night	Landing	Isabela Sur	Isabela	West	2.1	-0.9711	-90.9343	1	3	2.493333333
637	Villamil	Nov	2002	23.3	Day	Landing	Isabela Sur	Isabela	West	2.1	-0.9711	-90.9343	1	5	0.544
638	Villamil	Nov	2002	23.3	Day	Landing	Isabela Sur	Isabela	West	2.1	-0.9711	-90.9343	1	4	0.625
639	Villamil	Nov	2002	23.3	Day	Landing	Isabela Sur	Isabela	West	2.1	-0.9711	-90.9343	1	4	0.795
640	Villamil	Nov	2002	23.3	Day	Landing	Isabela Sur	Isabela	West	2.1	-0.9711	-90.9343	1	4	0.625
641	Villamil	Nov	2002	23.3	Day	Landing	Isabela Sur	Isabela	West	2.1	-0.9711	-90.9343	1	4	1.075
642	Villamil	Nov	2002	23.3	Night	Landing	Isabela Sur	Isabela	West	2.1	-0.9711	-90.9343	2	2	0.05
643	Villamil	Nov	2002	23.3	Day	Landing	Isabela Sur	Isabela	West	14.3	-0.85295	-90.78476	2	10	0.5
644	Villamil	Nov	2002	23.3	Day	Landing	Isabela Sur	Isabela	West	14.9	-1.04912	-91.18457	1	4	0.1125
645	Villamil	Nov	2002	23.3	Day	Landing	Isabela Sur	Isabela	West	14.9	-1.04912	-91.18457	2	10	0.805
646	Villamil	Nov	2002	23.3	Day	Landing	Isabela Sur	Isabela	West	14.9	-1.04912	-91.18457	1	10	0.91
647	Villamil	Nov	2002	23.3	Day	Landing	Isabela Sur	Isabela	West	6.56	-1.01864	-91.05577	1	4	0.1125
648	Villamil	Nov	2002	23.3	Day	Landing	Isabela Sur	Isabela	West	6.56	-1.01864	-91.05577	1	5	1.36
649	Villamil	Nov	2002	23.3	Day	Landing	Isabela Sur	Isabela	West	6.56	-1.01864	-91.05577	1	4	0.1125
650	Villamil	Nov	2002	23.3	Day	Landing	Isabela Sur	Isabela	West	6.56	-1.01864	-91.05577	1	4	0.17
651	Villamil	Nov	2002	23.3	Day	Landing	Isabela Sur	Isabela	West	6.56	-1.01864	-91.05577	1	4	0.17
652	Villamil	Nov	2002	23.3	Night	Landing	Isabela Sur	Isabela	West	6.56	-1.01864	-91.05577	1	4	1.305
653	Villamil	Nov	2002	23.3	Day	Landing	Isabela Sur	Isabela	West	6.56	-1.01864	-91.05577	1	5	0.362
654	Villamil	Nov	2002	23.3	Day	Landing	Isabela Sur	Isabela	West	6.56	-1.01864	-91.05577	2	4	0.255
655	Villamil	Nov	2002	23.3	Day	Landing	Isabela Sur	Isabela	West	6.56	-1.01864	-91.05577	1	4	0.91
656	Villamil	Nov	2002	23.3	Day	Landing	Isabela Sur	Isabela	West	6.56	-1.01864	-91.05577	1	4	0.05
657	Villamil	Nov	2002	23.3	Day	Landing	Isabela Sur	Isabela	West	6.56	-1.01864	-91.05577	1	4	0.05
658	Villamil	Nov	2002	23.3	Night	Landing	Isabela Sur	Isabela	West	8.1	-0.92	-90.85	1	3	1.2
659	Villamil	Nov	2002	23.3	Day	Landing	Isabela Sur	Isabela	West	8.1	-0.92	-90.85	1	4	1.125
660	Villamil	Nov	2002	23.3	Day	Landing	Isabela Sur	Isabela	West	18	-1.0358	-91.2282	1	20	0.445
661	Villamil	Nov	2002	23.3	Day	Landing	Isabela Sur	Isabela	West	18	-1.0358	-91.2282	1	20	1.24
662	Villamil	Nov	2002	23.3	Day	Landing	Isabela Sur	Isabela	West	18	-1.0358	-91.2282	1	4	0.175
663	Baquerizo	Dec	2002	24.3	Night	Landing	Espa�ola	Espa�ola	Centre- South	33	1.3434	-89.6983	2	8	0.410625
664	Baquerizo	Dec	2002	24.3	Night	Landing	Espa�ola	Espa�ola	Centre- South	36.6	-1.3477	-89.6749	2	8	0.28125
665	Villamil	Dec	2002	24.3	Day	Landing	Isabela Oeste	Isabela	West	76.7	-0.43544	-91.23636	1	20	0.68
666	Villamil	Dec	2002	24.3	Day	Landing	Isabela Oeste	Isabela	West	77.3	-0.6796825	-91.26178085	1	30	0.023333333
667	Villamil	Dec	2002	23.7	Day	Landing	Isabela Sur	Isabela	West	3.7	-0.99697	-91.01602	1	1	0.2
668	Villamil	Dec	2002	23.7	Day	Landing	Isabela Sur	Isabela	West	3.7	-0.99697	-91.01602	2	5	0.05
669	Villamil	Dec	2002	23.7	Night	Landing	Isabela Sur	Isabela	West	1	-0.965	-90.976	1	3	0.366666667
670	Villamil	Dec	2002	23.7	Day	Landing	Isabela Sur	Isabela	West	17	-0.79173	-90.81927	2	4	1.1375
671	Villamil	Dec	2002	23.7	Day	Landing	Isabela Sur	Isabela	West	17	-0.79173	-90.81927	1	3	4.166666667
672	Villamil	Dec	2002	23.7	Day	Landing	Isabela Sur	Isabela	West	17	-0.79173	-90.81927	1	4	2.625
673	Villamil	Dec	2002	23.7	Day	Landing	Isabela Sur	Isabela	West	17	-0.79173	-90.81927	1	4	2.275
674	Villamil	Dec	2002	23.7	Night	Landing	Isabela Sur	Isabela	West	17	-0.79173	-90.81927	1	3	3.866666667
675	Villamil	Dec	2002	23.7	Night	Landing	Isabela Sur	Isabela	West	17	-0.79173	-90.81927	1	4	3.25
676	Villamil	Dec	2002	23.7	Day	Landing	Isabela Sur	Isabela	West	4.83	-1.0041	-91.039	1	4	0.175
677	Villamil	Dec	2002	23.7	Day	Landing	Isabela Sur	Isabela	West	4.83	-1.0041	-91.039	1	4	1.25
678	Villamil	Dec	2002	23.7	Day	Landing	Isabela Sur	Isabela	West	4.83	-1.0041	-91.039	1	3	0.066666667
679	Villamil	Dec	2002	23.7	Day	Landing	Isabela Sur	Isabela	West	4.83	-1.0041	-91.039	1	4	0.05
680	Villamil	Dec	2002	23.7	Day	Landing	Isabela Sur	Isabela	West	4.83	-1.0041	-91.039	1	4	0.45
681	Villamil	Dec	2002	23.7	Day	Landing	Isabela Sur	Isabela	West	4.83	-1.0041	-91.039	1	4	0.5
682	Villamil	Dec	2002	23.7	Day	Landing	Isabela Sur	Isabela	West	4.83	-1.0041	-91.039	1	4	0.4
683	Villamil	Dec	2002	23.7	Day	Landing	Isabela Sur	Isabela	West	4.83	-1.0041	-91.039	1	4	0.45
684	Villamil	Dec	2002	23.7	Day	Landing	Isabela Sur	Isabela	West	4.83	-1.0041	-91.039	1	4	0.425
685	Villamil	Dec	2002	23.7	Day	Landing	Isabela Sur	Isabela	West	4.83	-1.0041	-91.039	1	4	0.45
686	Villamil	Dec	2002	23.7	Day	Landing	Isabela Sur	Isabela	West	4.83	-1.0041	-91.039	1	5	0.36
687	Villamil	Dec	2002	23.7	Day	Landing	Isabela Sur	Isabela	West	4.83	-1.0041	-91.039	1	4	0.75
688	Villamil	Dec	2002	23.7	Day	Landing	Isabela Sur	Isabela	West	4.83	-1.0041	-91.039	1	3	0.2
689	Villamil	Dec	2002	23.7	Day	Landing	Isabela Sur	Isabela	West	4.83	-1.0041	-91.039	1	3	0.3
690	Villamil	Dec	2002	23.7	Night	Landing	Isabela Sur	Isabela	West	4.83	-1.0041	-91.039	1	3	1.733333333
691	Villamil	Dec	2002	23.7	Day	Landing	Isabela Sur	Isabela	West	4.83	-1.0041	-91.039	1	4	0.575
692	Villamil	Dec	2002	23.7	Day	Landing	Isabela Sur	Isabela	West	4.83	-1.0041	-91.039	1	4	0.35
693	Villamil	Dec	2002	23.7	Day	Landing	Isabela Sur	Isabela	West	4.83	-1.0041	-91.039	1	3	0.166666667
694	Villamil	Dec	2002	23.7	Day	Landing	Isabela Sur	Isabela	West	4.83	-1.0041	-91.039	1	4	0.55
695	Villamil	Dec	2002	23.7	Day	Landing	Isabela Sur	Isabela	West	4.83	-1.0041	-91.039	1	5	0.1
696	Villamil	Dec	2002	23.7	Day	Landing	Isabela Sur	Isabela	West	4.83	-1.0041	-91.039	1	4	0.275
697	Villamil	Dec	2002	23.7	Night	Landing	Isabela Sur	Isabela	West	4.83	-1.0041	-91.039	1	3	0.466666667
698	Villamil	Dec	2002	23.7	Day	Landing	Isabela Sur	Isabela	West	14.7	-1.05069	-91.17433	1	4	1.2
699	Villamil	Dec	2002	23.7	Day	Landing	Isabela Sur	Isabela	West	14.7	-1.05069	-91.17433	1	4	1.65
700	Villamil	Dec	2002	23.7	Day	Landing	Isabela Sur	Isabela	West	14.7	-1.05069	-91.17433	1	4	0.45
701	Villamil	Dec	2002	23.7	Night	Landing	Isabela Sur	Isabela	West	14.7	-1.05069	-91.17433	2	4	2.075
702	Villamil	Dec	2002	23.7	Night	Landing	Isabela Sur	Isabela	West	14.7	-1.05069	-91.17433	1	4	1.925
703	Villamil	Dec	2002	23.7	Day	Landing	Isabela Sur	Isabela	West	14.7	-1.05069	-91.17433	1	4	0.9
704	Villamil	Dec	2002	23.7	Day	Landing	Isabela Sur	Isabela	West	14.7	-1.05069	-91.17433	1	15	0.606666667
705	Villamil	Dec	2002	23.7	Day	Landing	Isabela Sur	Isabela	West	14.7	-1.05069	-91.17433	1	10	0.27
706	Villamil	Dec	2002	23.7	Day	Landing	Isabela Sur	Isabela	West	14.7	-1.05069	-91.17433	1	20	0.955
707	Villamil	Dec	2002	23.7	Day	Landing	Isabela Sur	Isabela	West	0.52	-0.96708	-90.9665	1	4	0.075
708	Villamil	Dec	2002	23.7	Day	Landing	Isabela Sur	Isabela	West	0.52	-0.96708	-90.9665	1	5	0.14
709	Villamil	Dec	2002	23.7	Day	Landing	Isabela Sur	Isabela	West	0.52	-0.96708	-90.9665	1	4	1.125
710	Villamil	Dec	2002	23.7	Day	Landing	Isabela Sur	Isabela	West	0.52	-0.96708	-90.9665	1	4	0.15
711	Villamil	Dec	2002	23.7	Day	Landing	Isabela Sur	Isabela	West	0.52	-0.96708	-90.9665	1	4	1.35
712	Villamil	Dec	2002	23.7	Night	Landing	Isabela Sur	Isabela	West	1.93	-0.97723	-90.98803	2	4	0.4
713	Villamil	Dec	2002	23.7	Day	Landing	Isabela Sur	Isabela	West	1.93	-0.97723	-90.98803	2	4	0.0875
714	Villamil	Dec	2002	23.7	Day	Landing	Isabela Sur	Isabela	West	1.93	-0.97723	-90.98803	1	3	0.066666667
715	Villamil	Dec	2002	23.7	Day	Landing	Isabela Sur	Isabela	West	1.93	-0.97723	-90.98803	1	3	1.5
716	Villamil	Dec	2002	23.7	Day	Landing	Isabela Sur	Isabela	West	1.93	-0.97723	-90.98803	1	3	0.3
717	Villamil	Dec	2002	23.7	Day	Landing	Isabela Sur	Isabela	West	1.93	-0.97723	-90.98803	1	4	0.225
718	Villamil	Dec	2002	23.7	Day	Landing	Isabela Sur	Isabela	West	12.2	-1.0394	-91.1467	1	15	0.486666667
719	Villamil	Dec	2002	23.7	Day	Landing	Isabela Sur	Isabela	West	12.2	-1.0394	-91.1467	2	12	0.5875
720	Villamil	Dec	2002	23.7	Day	Landing	Isabela Sur	Isabela	West	12.2	-1.0394	-91.1467	1	10	0.5
721	Villamil	Dec	2002	23.7	Day	Landing	Isabela Sur	Isabela	West	12.2	-1.0394	-91.1467	1	10	0.23
722	Villamil	Dec	2002	23.7	Day	Landing	Isabela Sur	Isabela	West	12.2	-1.0394	-91.1467	1	20	0.625
723	Villamil	Dec	2002	23.7	Day	Landing	Isabela Sur	Isabela	West	12.2	-1.0394	-91.1467	1	15	0.333333333
724	Villamil	Dec	2002	23.7	Day	Observer	Isabela Sur	Isabela	West	12.2	-1.0394	-91.1467	1	3	0.766666667
725	Villamil	Dec	2002	23.7	Day	Landing	Isabela Sur	Isabela	West	12.2	-1.0394	-91.1467	1	8	1.7
726	Villamil	Dec	2002	23.7	Day	Landing	Isabela Sur	Isabela	West	22.7	-0.72072	-90.80723	1	4	0.45
727	Villamil	Dec	2002	23.7	Day	Landing	Isabela Sur	Isabela	West	34.2	-0.95519	-91.461	2	16	0.00625
728	Villamil	Dec	2002	23.7	Day	Landing	Isabela Sur	Isabela	West	34.2	-0.95519	-91.461	2	20	0.285
729	Villamil	Dec	2002	23.7	Day	Landing	Isabela Sur	Isabela	West	34.2	-0.95519	-91.461	1	18	1.866666667
730	Villamil	Dec	2002	23.7	Day	Landing	Isabela Sur	Isabela	West	34.2	-0.95519	-91.461	1	20	1.24
731	Villamil	Dec	2002	23.7	Day	Landing	Isabela Sur	Isabela	West	34.2	-0.95519	-91.461	1	6	1.516666667
732	Villamil	Dec	2002	23.7	Day	Landing	Isabela Sur	Isabela	West	6.42	-0.9896	-90.8706	1	3	0.3
733	Villamil	Dec	2002	23.7	Day	Landing	Isabela Sur	Isabela	West	9.18	-1.02	-91.1	1	4	0.75
734	Villamil	Dec	2002	23.7	Day	Landing	Isabela Sur	Isabela	West	9.18	-1.02	-91.1	1	4	0.5
735	Villamil	Dec	2002	23.7	Day	Landing	Isabela Sur	Isabela	West	9.18	-1.02	-91.1	1	4	0.35
736	Villamil	Dec	2002	23.7	Day	Landing	Isabela Sur	Isabela	West	9.18	-1.02	-91.1	1	4	0.175
737	Villamil	Dec	2002	23.7	Day	Landing	Isabela Sur	Isabela	West	9.18	-1.02	-91.1	1	4	1.475
738	Villamil	Dec	2002	23.7	Day	Landing	Isabela Sur	Isabela	West	9.18	-1.02	-91.1	1	4	0.275
739	Villamil	Dec	2002	23.7	Day	Landing	Isabela Sur	Isabela	West	9.18	-1.02	-91.1	1	4	0.175
740	Villamil	Dec	2002	23.7	Day	Landing	Isabela Sur	Isabela	West	9.18	-1.02	-91.1	1	4	0.95
741	Villamil	Dec	2002	23.7	Day	Landing	Isabela Sur	Isabela	West	1.21	-0.978203	-90.95763	1	4	0.575
742	Villamil	Dec	2002	23.7	Day	Landing	Isabela Sur	Isabela	West	1.21	-0.978203	-90.95763	1	5	0.1
743	Villamil	Dec	2002	23.7	Day	Landing	Isabela Sur	Isabela	West	1.21	-0.978203	-90.95763	1	4	0.175
744	Villamil	Dec	2002	23.7	Day	Landing	Isabela Sur	Isabela	West	1.21	-0.978203	-90.95763	1	3	0.766666667
745	Villamil	Dec	2002	23.7	Day	Landing	Isabela Sur	Isabela	West	1.21	-0.978203	-90.95763	1	4	1.075
746	Villamil	Dec	2002	23.7	Day	Landing	Isabela Sur	Isabela	West	1.21	-0.978203	-90.95763	1	3	0.133333333
747	Villamil	Dec	2002	23.7	Day	Landing	Isabela Sur	Isabela	West	1.21	-0.978203	-90.95763	1	2	0.9
748	Villamil	Dec	2002	23.7	Day	Landing	Isabela Sur	Isabela	West	1.21	-0.978203	-90.95763	1	5	0.46
749	Villamil	Dec	2002	23.7	Day	Landing	Isabela Sur	Isabela	West	1.21	-0.978203	-90.95763	1	4	0.05
750	Villamil	Dec	2002	23.7	Day	Landing	Isabela Sur	Isabela	West	2.1	-0.9711	-90.9343	1	4	0.75
751	Villamil	Dec	2002	23.7	Night	Landing	Isabela Sur	Isabela	West	2.1	-0.9711	-90.9343	1	4	1.925
752	Villamil	Dec	2002	23.7	Day	Landing	Isabela Sur	Isabela	West	2.1	-0.9711	-90.9343	1	4	0.75
753	Villamil	Dec	2002	23.7	Day	Landing	Isabela Sur	Isabela	West	2.1	-0.9711	-90.9343	1	4	0.35
754	Villamil	Dec	2002	23.7	Day	Landing	Isabela Sur	Isabela	West	2.1	-0.9711	-90.9343	1	4	1.375
755	Villamil	Dec	2002	23.7	Day	Landing	Isabela Sur	Isabela	West	14.9	-1.04912	-91.18457	1	15	0.486666667
756	Villamil	Dec	2002	23.7	Day	Landing	Isabela Sur	Isabela	West	14.9	-1.04912	-91.18457	2	10	0.545
757	Villamil	Dec	2002	23.7	Day	Landing	Isabela Sur	Isabela	West	14.9	-1.04912	-91.18457	1	10	0.11
758	Villamil	Dec	2002	23.7	Day	Landing	Isabela Sur	Isabela	West	14.9	-1.04912	-91.18457	1	4	0.575
759	Villamil	Dec	2002	23.7	Day	Landing	Isabela Sur	Isabela	West	6.56	-1.01864	-91.05577	1	4	0.4
760	Villamil	Dec	2002	23.7	Day	Landing	Isabela Sur	Isabela	West	6.56	-1.01864	-91.05577	1	4	0.35
761	Villamil	Dec	2002	23.7	Day	Landing	Isabela Sur	Isabela	West	6.56	-1.01864	-91.05577	1	4	0.05
762	Villamil	Dec	2002	23.7	Day	Landing	Isabela Sur	Isabela	West	6.56	-1.01864	-91.05577	1	3	0.076666667
763	Villamil	Dec	2002	23.7	Day	Landing	Isabela Sur	Isabela	West	6.56	-1.01864	-91.05577	1	4	0.125
764	Villamil	Dec	2002	23.7	Day	Landing	Isabela Sur	Isabela	West	6.56	-1.01864	-91.05577	1	4	0.125
765	Villamil	Dec	2002	23.7	Day	Landing	Isabela Sur	Isabela	West	6.56	-1.01864	-91.05577	1	4	0.125
766	Villamil	Dec	2002	23.7	Day	Landing	Isabela Sur	Isabela	West	6.56	-1.01864	-91.05577	1	4	0.225
767	Villamil	Dec	2002	23.7	Day	Landing	Isabela Sur	Isabela	West	6.56	-1.01864	-91.05577	1	4	0.125
768	Villamil	Dec	2002	23.7	Day	Landing	Isabela Sur	Isabela	West	6.56	-1.01864	-91.05577	1	4	0.05
769	Villamil	Dec	2002	23.7	Day	Landing	Isabela Sur	Isabela	West	6.56	-1.01864	-91.05577	1	4	0.225
770	Villamil	Dec	2002	23.7	Day	Landing	Isabela Sur	Isabela	West	6.56	-1.01864	-91.05577	1	4	0.9
771	Villamil	Dec	2002	23.7	Day	Landing	Isabela Sur	Isabela	West	6.56	-1.01864	-91.05577	1	4	0.125
772	Villamil	Dec	2002	23.7	Day	Landing	Isabela Sur	Isabela	West	6.56	-1.01864	-91.05577	1	4	0.05
773	Villamil	Dec	2002	23.7	Day	Landing	Isabela Sur	Isabela	West	6.56	-1.01864	-91.05577	1	4	0.05
774	Villamil	Dec	2002	23.7	Day	Landing	Isabela Sur	Isabela	West	6.56	-1.01864	-91.05577	1	4	0.05
775	Villamil	Dec	2002	23.7	Day	Landing	Isabela Sur	Isabela	West	6.56	-1.01864	-91.05577	1	4	0.225
776	Villamil	Dec	2002	23.7	Day	Landing	Isabela Sur	Isabela	West	6.56	-1.01864	-91.05577	1	5	0.28
777	Villamil	Dec	2002	23.7	Day	Landing	Isabela Sur	Isabela	West	6.56	-1.01864	-91.05577	1	4	0.125
778	Villamil	Dec	2002	23.7	Day	Landing	Isabela Sur	Isabela	West	6.56	-1.01864	-91.05577	1	4	1.575
779	Villamil	Dec	2002	23.7	Day	Landing	Isabela Sur	Isabela	West	6.56	-1.01864	-91.05577	1	4	0.35
780	Villamil	Dec	2002	23.7	Day	Landing	Isabela Sur	Isabela	West	6.56	-1.01864	-91.05577	1	4	0.175
781	Villamil	Dec	2002	23.7	Day	Landing	Isabela Sur	Isabela	West	6.56	-1.01864	-91.05577	1	2	0.25
782	Villamil	Dec	2002	23.7	Day	Landing	Isabela Sur	Isabela	West	6.56	-1.01864	-91.05577	1	3	0.066666667
783	Villamil	Dec	2002	23.7	Day	Landing	Isabela Sur	Isabela	West	6.56	-1.01864	-91.05577	1	4	0.05
784	Villamil	Dec	2002	23.7	Day	Landing	Isabela Sur	Isabela	West	18	-1.0358	-91.2282	2	20	0.205
785	Villamil	Dec	2002	23.7	Day	Landing	Isabela Sur	Isabela	West	18	-1.0358	-91.2282	2	8	1.39375
786	Villamil	Dec	2002	23.7	Day	Landing	Isabela Sur	Isabela	West	18	-1.0358	-91.2282	1	6	1.1
787	Villamil	Dec	2002	23.7	Day	Landing	Isabela Sur	Isabela	West	18	-1.0358	-91.2282	1	3	0.6
788	Villamil	Dec	2002	23.7	Day	Landing	Isabela Sur	Isabela	West	18	-1.0358	-91.2282	1	4	1.35
789	Ayora	Sep	2002	23.5	Day	Observer	Pinta	Pinta	North	106	0.57703	-90.78497	1	4	0.55
790	Ayora	Sep	2002	23.5	Night	Landing	Pinta	Pinta	North	106	0.5811	-90.78637	1	3	1.333333333
791	Ayora	Sep	2002	23.5	Night	Observer	Pinta	Pinta	North	106	0.5811	-90.78637	2	3	1.166666667
792	Ayora	Sep	2002	23.5	Day	Observer	Pinta	Pinta	North	106	0.57703	-90.78497	2	4	0.125
793	Ayora	Sep	2002	23.5	Night	Observer	Pinta	Pinta	North	106	0.5811	-90.78637	2	3	1.5
794	Ayora	Sep	2002	23.5	Day	Observer	Pinta	Pinta	North	106	0.57703	-90.78497	2	4	0.25
795	Ayora	Sep	2002	23.5	Night	Observer	Pinta	Pinta	North	106	0.5811	-90.78637	2	3	0.083333333
796	Ayora	Sep	2002	23.5	Day	Observer	Pinta	Pinta	North	106	0.57703	-90.78497	2	4	0.825
797	Ayora	Sep	2002	23.5	Night	Landing	Pinta	Pinta	North	92.8	0.4761	-90.6455	1	2	1.8
798	Ayora	Sep	2002	23.5	Night	Landing	Pinta	Pinta	North	92.8	0.4761	-90.6455	2	3	2.95
799	Ayora	Sep	2002	23.5	Night	Landing	Pinta	Pinta	North	92.8	0.4761	-90.6455	2	2	0.675
800	Ayora	Sep	2002	23.5	Night	Landing	Pinta	Pinta	North	92.8	0.4761	-90.6455	2	2	1.825
801	Ayora	Sep	2002	23.5	Day	Landing	Pinta	Pinta	North	92.8	0.4761	-90.6455	7	8	5.571428571
802	Baquerizo	Sep	2002	23.5	Night	Observer	Pinta	Pinta	North	133	0.62525	-90.75392	1	6	2.418333333
803	Baquerizo	Sep	2002	23.5	Night	Observer	Pinta	Pinta	North	136	0.69908	-90.77776	1	6	2.266666667
804	Baquerizo	Sep	2002	23.5	Night	Observer	Pinta	Pinta	North	131	0.5811	-90.78637	1	7	1.165714286
805	Baquerizo	Sep	2002	23.5	Night	Observer	Pinta	Pinta	North	133	0.62525	-90.75392	1	4	3.9675
806	Baquerizo	Sep	2002	23.5	Night	Observer	Pinta	Pinta	North	131	0.5811	-90.78637	2	6	1.473333333
807	Baquerizo	Sep	2002	23.5	Night	Observer	Pinta	Pinta	North	136	0.6471	-90.774	2	4	0.85
808	Baquerizo	Sep	2002	23.5	Night	Observer	Pinta	Pinta	North	131	0.5811	-90.78637	1	5	1.814
809	Baquerizo	Sep	2002	23.5	Night	Observer	Pinta	Pinta	North	133	0.62525	-90.75392	1	6	1.74
810	Baquerizo	Sep	2002	23.5	Night	Observer	Pinta	Pinta	North	136	0.64383	-90.77753	1	5	3.264
811	Baquerizo	Sep	2002	23.5	Night	Observer	Pinta	Pinta	North	136	0.6471	-90.774	2	3	0.906666667
812	Baquerizo	Sep	2002	23.5	Night	Observer	Pinta	Pinta	North	133	0.62525	-90.75392	2	4	0.2825
813	Baquerizo	Sep	2002	23.5	Night	Observer	Pinta	Pinta	North	131	0.61232	-90.78858	2	7	1.878571429
814	Baquerizo	Sep	2002	23.5	Night	Observer	Pinta	Pinta	North	131	0.56342	-90.78331	2	6	1.7
815	Baquerizo	Sep	2002	23.5	Night	Observer	Pinta	Pinta	North	136	0.6471	-90.774	2	7	1.587142857
816	Baquerizo	Sep	2002	23.5	Night	Observer	Pinta	Pinta	North	133	0.62525	-90.75392	8	26	0.270336538
817	Baquerizo	Sep	2002	23.5	Night	Observer	Pinta	Pinta	North	136	0.6471	-90.774	8	25	0.263
818	Baquerizo	Sep	2002	23.5	Night	Observer	Pinta	Pinta	North	131	0.5811	-90.78637	8	35	0.205678571
819	Ayora	Sep	2002	22.2	Night	Landing	San Cristobal N y O	San Cristobal	Centre- South	102	0.06442	-91.50484	7	4	2
820	Baquerizo	Sep	2002	22.2	Night	Landing	San Cristobal N y O	San Cristobal	Centre- South	22	-0.683	-89.3279	2	8	2.26875
821	Baquerizo	Sep	2002	22.2	Night	Landing	San Cristobal N y O	San Cristobal	Centre- South	22	-0.683	-89.3279	2	8	1.41875
822	Baquerizo	Sep	2002	22.2	Night	Landing	San Cristobal N y O	San Cristobal	Centre- South	19.8	-0.7042	-89.3752	1	8	0.58625
823	Baquerizo	Sep	2002	22.2	Night	Landing	San Cristobal N y O	San Cristobal	Centre- South	7.46	-0.8139	-89.5417	1	4	0.2825
824	Baquerizo	Sep	2002	22.2	Day	Landing	San Cristobal N y O	San Cristobal	Centre- South	12.8	-0.77633	-89.47567	1	5	0.362
825	Baquerizo	Sep	2002	22.2	Night	Landing	San Cristobal N y O	San Cristobal	Centre- South	7.46	-0.8139	-89.5417	2	8	0.7125
826	Baquerizo	Sep	2002	22.2	Night	Landing	San Cristobal N y O	San Cristobal	Centre- South	22	-0.683	-89.3279	1	6	1.007222222
827	Baquerizo	Sep	2002	22.2	Day	Landing	San Cristobal N y O	San Cristobal	Centre- South	12.8	-0.77633	-89.47567	1	7	0.70952381
828	Baquerizo	Sep	2002	22.2	Night	Landing	San Cristobal N y O	San Cristobal	Centre- South	12.8	-0.77633	-89.47567	1	5	1.36
829	Baquerizo	Sep	2002	22.2	Night	Landing	San Cristobal N y O	San Cristobal	Centre- South	7.46	-0.8139	-89.5417	2	5	0.85
830	Baquerizo	Sep	2002	22.2	Night	Observer	San Cristobal N y O	San Cristobal	Centre- South	12.8	-0.74931	-89.45114	1	5	0.26
831	Baquerizo	Sep	2002	20.9	Night	Landing	San Cristobal S y E	San Cristobal	Centre- South	17.4	-0.9254	-89.4113	1	5	0.544
832	Baquerizo	Sep	2002	20.9	Night	Landing	San Cristobal S y E	San Cristobal	Centre- South	6.1	-0.9409	-89.5906	1	5	1.268
833	Baquerizo	Sep	2002	20.9	Night	Landing	San Cristobal S y E	San Cristobal	Centre- South	26	-0.71267	-89.2403	1	5	0.724
834	Baquerizo	Sep	2002	20.9	Night	Landing	San Cristobal S y E	San Cristobal	Centre- South	9.5	-0.9557	-89.5197	2	7	0.595238095
835	Baquerizo	Sep	2002	20.9	Night	Landing	San Cristobal S y E	San Cristobal	Centre- South	5.41	-0.94788	-89.58696	1	4	3.725
836	Baquerizo	Sep	2002	20.9	Night	Landing	San Cristobal S y E	San Cristobal	Centre- South	11.2	-0.9497	-89.4963	1	6	1.738333333
837	Baquerizo	Sep	2002	20.9	Night	Landing	San Cristobal S y E	San Cristobal	Centre- South	26.2	-0.8626	-89.367	1	6	1.616666667
838	Baquerizo	Sep	2002	20.9	Night	Landing	San Cristobal S y E	San Cristobal	Centre- South	6.1	-0.9409	-89.5906	2	5	0.513333333
839	Baquerizo	Sep	2002	20.9	Night	Landing	San Cristobal S y E	San Cristobal	Centre- South	11.2	-0.9497	-89.4963	2	5	2.045
840	Baquerizo	Sep	2002	20.9	Day	Observer	San Cristobal S y E	San Cristobal	Centre- South	27.8	-0.842495	-89.352716	2	6	0.418333333
841	Baquerizo	Sep	2002	20.9	Day	Landing	San Cristobal S y E	San Cristobal	Centre- South	36.9	-0.7556	-89.2644	1	6	2.25
842	Baquerizo	Sep	2002	20.9	Night	Landing	San Cristobal S y E	San Cristobal	Centre- South	27.8	-0.842495	-89.352716	1	5	0.462
843	Baquerizo	Sep	2002	20.9	Night	Landing	San Cristobal S y E	San Cristobal	Centre- South	11.2	-0.9497	-89.4963	1	5	2.842
844	Baquerizo	Sep	2002	20.9	Night	Landing	San Cristobal S y E	San Cristobal	Centre- South	9.5	-0.9557	-89.5197	1	6	2.015555556
845	Baquerizo	Sep	2002	20.9	Night	Landing	San Cristobal S y E	San Cristobal	Centre- South	11.2	-0.9497	-89.4963	1	6	0.376666667
846	Baquerizo	Sep	2002	20.9	Day	Observer	San Cristobal S y E	San Cristobal	Centre- South	11.2	-0.93867	-89.47118	1	5	2.36
847	Baquerizo	Sep	2002	20.9	Night	Landing	San Cristobal S y E	San Cristobal	Centre- South	15.5	-0.93575	-89.43985	1	6	3.023333333
848	Baquerizo	Sep	2002	20.9	Night	Landing	San Cristobal S y E	San Cristobal	Centre- South	17.4	-0.9254	-89.4113	2	8	0.51
849	Baquerizo	Sep	2002	20.9	Night	Landing	San Cristobal S y E	San Cristobal	Centre- South	9.5	-0.9557	-89.5197	2	7	0.388571429
850	Baquerizo	Sep	2002	20.9	Night	Landing	San Cristobal S y E	San Cristobal	Centre- South	26	-0.71267	-89.2403	1	6	3.023333333
851	Baquerizo	Sep	2002	20.9	Night	Landing	San Cristobal S y E	San Cristobal	Centre- South	11.2	-0.9497	-89.4963	1	5	1.224
852	Baquerizo	Sep	2002	20.9	Night	Landing	San Cristobal S y E	San Cristobal	Centre- South	9.5	-0.9557	-89.5197	2	4	2.125
853	Baquerizo	Sep	2002	20.9	Night	Landing	San Cristobal S y E	San Cristobal	Centre- South	6.1	-0.9409	-89.5906	1	5	2.992
854	Baquerizo	Sep	2002	20.9	Night	Landing	San Cristobal S y E	San Cristobal	Centre- South	5.41	-0.94788	-89.58696	1	6	2.04
855	Baquerizo	Sep	2002	20.9	Night	Landing	San Cristobal S y E	San Cristobal	Centre- South	9.5	-0.9557	-89.5197	1	5	0.816
856	Baquerizo	Sep	2002	20.9	Night	Landing	San Cristobal S y E	San Cristobal	Centre- South	5.41	-0.94788	-89.58696	1	4	1.06
857	Baquerizo	Sep	2002	20.9	Night	Landing	San Cristobal S y E	San Cristobal	Centre- South	17.4	-0.9254	-89.4113	2	5	0.59
858	Baquerizo	Sep	2002	20.9	Night	Landing	San Cristobal S y E	San Cristobal	Centre- South	11.2	-0.9497	-89.4963	1	8	1.13625
859	Baquerizo	Sep	2002	20.9	Night	Landing	San Cristobal S y E	San Cristobal	Centre- South	11.2	-0.9497	-89.4963	2	6	0.308055556
860	Baquerizo	Sep	2002	20.9	Night	Landing	San Cristobal S y E	San Cristobal	Centre- South	8.25	-0.95585	-89.5428	2	4	0.73
861	Baquerizo	Sep	2002	20.9	Night	Landing	San Cristobal S y E	San Cristobal	Centre- South	11.2	-0.9497	-89.4963	1	6	2.645
862	Baquerizo	Sep	2002	20.9	Day	Landing	San Cristobal S y E	San Cristobal	Centre- South	11.2	-0.9497	-89.4963	1	4	0.34
863	Baquerizo	Sep	2002	20.9	Night	Landing	San Cristobal S y E	San Cristobal	Centre- South	11.2	-0.9497	-89.4963	2	6	0.869166667
864	Baquerizo	Sep	2002	20.9	Night	Landing	San Cristobal S y E	San Cristobal	Centre- South	11.2	-0.9497	-89.4963	1	9	0.844444444
865	Baquerizo	Sep	2002	20.9	Night	Landing	San Cristobal S y E	San Cristobal	Centre- South	8.25	-0.95585	-89.5428	1	6	1.536666667
866	Baquerizo	Sep	2002	20.9	Night	Landing	San Cristobal S y E	San Cristobal	Centre- South	9.5	-0.9557	-89.5197	1	4	0.755833333
867	Baquerizo	Sep	2002	20.9	Night	Landing	San Cristobal S y E	San Cristobal	Centre- South	11.2	-0.9497	-89.4963	1	6	1.410555556
868	Baquerizo	Sep	2002	20.9	Night	Landing	San Cristobal S y E	San Cristobal	Centre- South	11.2	-0.9497	-89.4963	2	6	0.516388889
869	Baquerizo	Sep	2002	20.9	Night	Landing	San Cristobal S y E	San Cristobal	Centre- South	15.5	-0.93575	-89.43985	2	6	1.3225
870	Baquerizo	Sep	2002	20.9	Night	Landing	San Cristobal S y E	San Cristobal	Centre- South	17.4	-0.9254	-89.4113	2	6	0.833333333
871	Baquerizo	Sep	2002	20.9	Night	Landing	San Cristobal S y E	San Cristobal	Centre- South	17.4	-0.9254	-89.4113	2	8	1.161875
872	Baquerizo	Sep	2002	20.9	Night	Landing	San Cristobal S y E	San Cristobal	Centre- South	26	-0.71267	-89.2403	2	6	0.591944444
873	Baquerizo	Sep	2002	20.9	Day	Landing	San Cristobal S y E	San Cristobal	Centre- South	27.8	-0.842495	-89.352716	2	6	0.627777778
874	Baquerizo	Sep	2002	20.9	Night	Landing	San Cristobal S y E	San Cristobal	Centre- South	11.2	-0.9497	-89.4963	1	4	1.889166667
875	Baquerizo	Sep	2002	20.9	Night	Landing	San Cristobal S y E	San Cristobal	Centre- South	11.2	-0.9497	-89.4963	2	4	2.75
876	Baquerizo	Sep	2002	20.9	Night	Landing	San Cristobal S y E	San Cristobal	Centre- South	17.4	-0.9254	-89.4113	1	8	1.30375
877	Baquerizo	Sep	2002	20.9	Day	Landing	San Cristobal S y E	San Cristobal	Centre- South	27.8	-0.842495	-89.352716	1	5	0.98
878	Baquerizo	Sep	2002	20.9	Night	Landing	San Cristobal S y E	San Cristobal	Centre- South	11.2	-0.9497	-89.4963	1	8	4.535
879	Baquerizo	Sep	2002	20.9	Night	Landing	San Cristobal S y E	San Cristobal	Centre- South	11.2	-0.9497	-89.4963	1	6	2.25
880	Baquerizo	Sep	2002	20.9	Night	Landing	San Cristobal S y E	San Cristobal	Centre- South	27.8	-0.842495	-89.352716	2	8	0.227083333
881	Baquerizo	Sep	2002	20.9	Day	Landing	San Cristobal S y E	San Cristobal	Centre- South	27.8	-0.842495	-89.352716	2	4	0.52875
882	Baquerizo	Sep	2002	20.9	Night	Landing	San Cristobal S y E	San Cristobal	Centre- South	17.4	-0.9254	-89.4113	2	3	0.301666667
883	Baquerizo	Sep	2002	20.9	Day	Landing	San Cristobal S y E	San Cristobal	Centre- South	11.2	-0.9497	-89.4963	1	6	1.36
884	Baquerizo	Sep	2002	20.9	Night	Landing	San Cristobal S y E	San Cristobal	Centre- South	27.8	-0.842495	-89.352716	2	8	0.5325
885	Baquerizo	Sep	2002	20.9	Day	Landing	San Cristobal S y E	San Cristobal	Centre- South	27.8	-0.842495	-89.352716	2	5	0.77
886	Baquerizo	Sep	2002	20.9	Day	Landing	San Cristobal S y E	San Cristobal	Centre- South	11.2	-0.9497	-89.4963	2	4	1.075
887	Baquerizo	Sep	2002	20.9	Day	Landing	San Cristobal S y E	San Cristobal	Centre- South	11.2	-0.9497	-89.4963	1	6	1.363333333
888	Baquerizo	Sep	2002	20.9	Night	Landing	San Cristobal S y E	San Cristobal	Centre- South	5.41	-0.94788	-89.58696	2	6	1.775
889	Baquerizo	Sep	2002	20.9	Night	Landing	San Cristobal S y E	San Cristobal	Centre- South	26	-0.71267	-89.2403	1	4	1.375
890	Baquerizo	Sep	2002	20.9	Night	Landing	San Cristobal S y E	San Cristobal	Centre- South	27.8	-0.842495	-89.352716	2	6	0.755833333
891	Baquerizo	Sep	2002	20.9	Day	Landing	San Cristobal S y E	San Cristobal	Centre- South	27.8	-0.842495	-89.352716	2	6	0.8875
892	Baquerizo	Sep	2002	20.9	Night	Landing	San Cristobal S y E	San Cristobal	Centre- South	26.2	-0.8626	-89.367	2	6	0.17
893	Baquerizo	Sep	2002	20.9	Night	Landing	San Cristobal S y E	San Cristobal	Centre- South	27.8	-0.842495	-89.352716	5	10	0.444
894	Baquerizo	Sep	2002	20.9	Night	Landing	San Cristobal S y E	San Cristobal	Centre- South	26	-0.71267	-89.2403	5	10	0.316
895	Ayora	Sep	2002	21.4	Day	Landing	Santa Cruz	Santa Cruz	Centre- South	7.42	-0.71	-90.2128	1	4	0.5
896	Ayora	Sep	2002	21.4	Night	Observer	Santa Cruz	Santa Cruz	Centre- South	10	-0.68476	-90.19523	1	6	0.066666667
897	Ayora	Sep	2002	21.4	Day	Landing	Santa Cruz	Santa Cruz	Centre- South	14	-0.73309	-90.4665	1	3	0.766666667
898	Ayora	Sep	2002	21.4	Day	Observer	Santa Cruz	Santa Cruz	Centre- South	26.5	-0.58467	-90.53199	1	8	0.604166667
899	Ayora	Sep	2002	21.4	Night	Observer	Santa Cruz	Santa Cruz	Centre- South	21.2	-0.65407	-90.54385	1	3	0.644444444
900	Ayora	Sep	2002	21.4	Day	Observer	Santa Cruz	Santa Cruz	Centre- South	21.2	-0.65407	-90.54384	1	6	0.922222222
901	Ayora	Sep	2002	21.4	Day	Landing	Santa Cruz	Santa Cruz	Centre- South	9.51	-0.75504	-90.42136	2	1	2
902	Ayora	Sep	2002	21.4	Night	Landing	Santa Cruz	Santa Cruz	Centre- South	23.6	-0.6042	-90.5411	1	10.5	2.304761905
903	Ayora	Sep	2002	21.4	Night	Landing	Santa Cruz	Santa Cruz	Centre- South	9.51	-0.75504	-90.42136	1	4	1.7
904	Ayora	Sep	2002	21.4	Night	Landing	Santa Cruz	Santa Cruz	Centre- South	9.51	-0.75504	-90.42136	2	18	0.516666667
905	Ayora	Sep	2002	21.4	Day	Landing	Santa Cruz	Santa Cruz	Centre- South	14	-0.73309	-90.4665	1	3	0.3
906	Ayora	Sep	2002	21.4	Day	Landing	Santa Cruz	Santa Cruz	Centre- South	7.42	-0.71	-90.2128	1	4	1.5
907	Ayora	Sep	2002	21.4	Night	Landing	Santa Cruz	Santa Cruz	Centre- South	14.6	-0.7236	-90.4896	1	5	3.6
908	Ayora	Sep	2002	21.4	Night	Landing	Santa Cruz	Santa Cruz	Centre- South	23.6	-0.6042	-90.5411	1	5	2.36
909	Ayora	Sep	2002	21.4	Day	Landing	Santa Cruz	Santa Cruz	Centre- South	7.42	-0.71	-90.2128	1	4	1.125
910	Ayora	Sep	2002	21.4	Day	Landing	Santa Cruz	Santa Cruz	Centre- South	11.3	-0.7485	-90.4464	2	4	0.175
911	Ayora	Sep	2002	21.4	Day	Landing	Santa Cruz	Santa Cruz	Centre- South	11.3	-0.7485	-90.4464	2	4	0.175
912	Ayora	Sep	2002	21.4	Night	Landing	Santa Cruz	Santa Cruz	Centre- South	11.3	-0.7485	-90.4464	1	5	1.72
913	Ayora	Sep	2002	21.4	Day	Landing	Santa Cruz	Santa Cruz	Centre- South	11.3	-0.7485	-90.4464	2	3	0.038888889
914	Ayora	Sep	2002	21.4	Night	Landing	Santa Cruz	Santa Cruz	Centre- South	9.51	-0.75504	-90.42136	1	4	2.75
915	Ayora	Sep	2002	21.4	Night	Landing	Santa Cruz	Santa Cruz	Centre- South	7.42	-0.71	-90.2128	1	2	0.9
916	Ayora	Sep	2002	21.4	Day	Landing	Santa Cruz	Santa Cruz	Centre- South	9.51	-0.75504	-90.42136	1	4	0.575
917	Ayora	Sep	2002	21.4	Day	Landing	Santa Cruz	Santa Cruz	Centre- South	21.2	-0.654	-90.5493	1	2	3.6
918	Ayora	Sep	2002	21.4	Day	Landing	Santa Cruz	Santa Cruz	Centre- South	14	-0.73309	-90.4665	1	5	0.72
919	Ayora	Sep	2002	21.4	Day	Landing	Santa Cruz	Santa Cruz	Centre- South	11.3	-0.7485	-90.4464	2	4	0.2
920	Ayora	Sep	2002	21.4	Night	Landing	Santa Cruz	Santa Cruz	Centre- South	21.2	-0.654	-90.5493	1	3	3
921	Ayora	Sep	2002	21.4	Day	Landing	Santa Cruz	Santa Cruz	Centre- South	5.62	-0.7354	-90.2324	1	5	0.46
922	Ayora	Sep	2002	21.4	Night	Landing	Santa Cruz	Santa Cruz	Centre- South	14.6	-0.7236	-90.4896	1	3	1.2
923	Ayora	Sep	2002	21.4	Day	Landing	Santa Cruz	Santa Cruz	Centre- South	11.3	-0.7485	-90.4464	1	4	0.45
924	Ayora	Sep	2002	21.4	Night	Landing	Santa Cruz	Santa Cruz	Centre- South	14	-0.73309	-90.4665	2	3	0.75
925	Ayora	Sep	2002	21.4	Night	Landing	Santa Cruz	Santa Cruz	Centre- South	14	-0.73309	-90.4665	1	2	3
926	Ayora	Sep	2002	21.4	Night	Landing	Santa Cruz	Santa Cruz	Centre- South	14.6	-0.7236	-90.4896	1	8	2.5625
927	Ayora	Sep	2002	21.4	Night	Landing	Santa Cruz	Santa Cruz	Centre- South	13	-0.74564	-90.44894	2	6.5	0.638461538
928	Ayora	Sep	2002	21.4	Day	Landing	Santa Cruz	Santa Cruz	Centre- South	9.51	-0.75504	-90.42136	1	3	1.833333333
929	Ayora	Sep	2002	21.4	Night	Landing	Santa Cruz	Santa Cruz	Centre- South	21.2	-0.654	-90.5493	1	47	0.223404255
930	Ayora	Sep	2002	21.4	Day	Landing	Santa Cruz	Santa Cruz	Centre- South	21.2	-0.654	-90.5493	2	5	1
931	Ayora	Sep	2002	21.4	Night	Landing	Santa Cruz	Santa Cruz	Centre- South	14	-0.73309	-90.4665	2	6	0.3
932	Ayora	Sep	2002	21.4	Night	Landing	Santa Cruz	Santa Cruz	Centre- South	11.3	-0.7485	-90.4464	1	2	1.25
933	Ayora	Sep	2002	21.4	Night	Landing	Santa Cruz	Santa Cruz	Centre- South	9.51	-0.75504	-90.42136	1	2	0.9
934	Ayora	Sep	2002	21.4	Night	Landing	Santa Cruz	Santa Cruz	Centre- South	21.2	-0.654	-90.5493	1	6	1.283333333
935	Ayora	Sep	2002	21.4	Day	Landing	Santa Cruz	Santa Cruz	Centre- South	9.51	-0.75504	-90.42136	1	4	0.45
936	Ayora	Sep	2002	21.4	Day	Landing	Santa Cruz	Santa Cruz	Centre- South	14.6	-0.7236	-90.4896	1	3	0.1
937	Ayora	Sep	2002	21.4	Night	Landing	Santa Cruz	Santa Cruz	Centre- South	21.2	-0.654	-90.5493	1	6	1.583333333
938	Ayora	Sep	2002	21.4	Day	Landing	Santa Cruz	Santa Cruz	Centre- South	12.7	-0.6476	-90.1808	1	5	0.4
939	Ayora	Sep	2002	21.4	Day	Landing	Santa Cruz	Santa Cruz	Centre- South	5.62	-0.7354	-90.2324	1	4	0.175
940	Ayora	Sep	2002	21.4	Night	Landing	Santa Cruz	Santa Cruz	Centre- South	21.2	-0.654	-90.5493	1	5	2.9
941	Ayora	Sep	2002	21.4	Day	Landing	Santa Cruz	Santa Cruz	Centre- South	14	-0.73309	-90.4665	1	3	1.733333333
942	Ayora	Sep	2002	21.4	Day	Landing	Santa Cruz	Santa Cruz	Centre- South	11.3	-0.7485	-90.4464	2	5	0.06
943	Ayora	Sep	2002	21.4	Night	Landing	Santa Cruz	Santa Cruz	Centre- South	26.5	-0.57354	-90.53749	1	4	2.85
944	Ayora	Sep	2002	21.4	Night	Landing	Santa Cruz	Santa Cruz	Centre- South	7.42	-0.71	-90.2128	1	5	0.36
945	Ayora	Sep	2002	21.4	Day	Landing	Santa Cruz	Santa Cruz	Centre- South	13	-0.74564	-90.44894	1	5	0.46
946	Ayora	Sep	2002	21.4	Day	Landing	Santa Cruz	Santa Cruz	Centre- South	9.51	-0.75504	-90.42136	1	4	1.166666667
947	Ayora	Sep	2002	21.4	Night	Landing	Santa Cruz	Santa Cruz	Centre- South	28.8	-0.5465	-90.5233	1	9	4.244444444
948	Ayora	Sep	2002	21.4	Day	Landing	Santa Cruz	Santa Cruz	Centre- South	9.51	-0.75504	-90.42136	1	6	0.65
949	Ayora	Sep	2002	21.4	Night	Landing	Santa Cruz	Santa Cruz	Centre- South	11.3	-0.7485	-90.4464	1	3	1.5
950	Ayora	Sep	2002	21.4	Night	Landing	Santa Cruz	Santa Cruz	Centre- South	11.3	-0.7485	-90.4464	1	3	1.333333333
951	Ayora	Sep	2002	21.4	Night	Landing	Santa Cruz	Santa Cruz	Centre- South	13	-0.74564	-90.44894	2	7	0.642857143
952	Ayora	Sep	2002	21.4	Night	Landing	Santa Cruz	Santa Cruz	Centre- South	14	-0.73309	-90.4665	1	4	1.65
953	Ayora	Sep	2002	21.4	Night	Landing	Santa Cruz	Santa Cruz	Centre- South	14	-0.73309	-90.4665	1	4	2.025
954	Ayora	Sep	2002	21.4	Day	Landing	Santa Cruz	Santa Cruz	Centre- South	14	-0.73309	-90.4665	1	4	0.45
955	Ayora	Sep	2002	21.4	Night	Landing	Santa Cruz	Santa Cruz	Centre- South	14	-0.73309	-90.4665	1	4	1.7
956	Ayora	Sep	2002	21.4	Night	Landing	Santa Cruz	Santa Cruz	Centre- South	21.2	-0.654	-90.5493	1	3	1.5
957	Ayora	Sep	2002	21.4	Night	Landing	Santa Cruz	Santa Cruz	Centre- South	9.51	-0.75504	-90.42136	1	4	1.625
958	Ayora	Sep	2002	21.4	Day	Landing	Santa Cruz	Santa Cruz	Centre- South	7.42	-0.71	-90.2128	1	3	0.6
959	Ayora	Sep	2002	21.4	Day	Landing	Santa Cruz	Santa Cruz	Centre- South	14	-0.73309	-90.4665	2	6	0.2
960	Ayora	Sep	2002	21.4	Day	Landing	Santa Cruz	Santa Cruz	Centre- South	7.42	-0.71	-90.2128	1	3	0.433333333
961	Ayora	Sep	2002	21.4	Day	Landing	Santa Cruz	Santa Cruz	Centre- South	7.42	-0.71	-90.2128	1	4	0.258333333
962	Ayora	Sep	2002	21.4	Night	Landing	Santa Cruz	Santa Cruz	Centre- South	23.6	-0.6042	-90.5411	1	2	0.666666667
963	Ayora	Sep	2002	21.4	Night	Landing	Santa Cruz	Santa Cruz	Centre- South	9.51	-0.75504	-90.42136	2	2	1.475
964	Ayora	Sep	2002	21.4	Night	Landing	Santa Cruz	Santa Cruz	Centre- South	14.6	-0.7236	-90.4896	1	4	0.9
965	Ayora	Sep	2002	21.4	Night	Landing	Santa Cruz	Santa Cruz	Centre- South	14	-0.73309	-90.4665	2	6	1.191666667
966	Ayora	Sep	2002	21.4	Night	Landing	Santa Cruz	Santa Cruz	Centre- South	13	-0.74564	-90.44894	1	4	1.3
967	Ayora	Sep	2002	21.4	Night	Landing	Santa Cruz	Santa Cruz	Centre- South	13.8	-0.73309	-90.4665	1	4	1.575
968	Ayora	Sep	2002	21.4	Day	Landing	Santa Cruz	Santa Cruz	Centre- South	24.6	-0.4984	-90.2414	1	3	3
969	Ayora	Sep	2002	21.4	Day	Landing	Santa Cruz	Santa Cruz	Centre- South	7.42	-0.71	-90.2128	2	5	0.4
970	Ayora	Sep	2002	21.4	Day	Landing	Santa Cruz	Santa Cruz	Centre- South	14	-0.73309	-90.4665	2	4	2.8375
971	Ayora	Sep	2002	21.4	Night	Landing	Santa Cruz	Santa Cruz	Centre- South	14.6	-0.7236	-90.4896	1	8	1.9875
972	Ayora	Sep	2002	21.4	Night	Landing	Santa Cruz	Santa Cruz	Centre- South	13	-0.74564	-90.44894	1	3	1.5
973	Ayora	Sep	2002	21.4	Night	Landing	Santa Cruz	Santa Cruz	Centre- South	11.3	-0.7485	-90.4464	1	7	1.357142857
974	Ayora	Sep	2002	21.4	Night	Landing	Santa Cruz	Santa Cruz	Centre- South	14.6	-0.7236	-90.4896	2	8	3.25
975	Ayora	Sep	2002	21.4	Night	Landing	Santa Cruz	Santa Cruz	Centre- South	9.51	-0.75504	-90.42136	1	5	1.8
976	Ayora	Sep	2002	21.4	Night	Landing	Santa Cruz	Santa Cruz	Centre- South	14.6	-0.7236	-90.4896	1	4	0.4
977	Ayora	Sep	2002	21.4	Day	Landing	Santa Cruz	Santa Cruz	Centre- South	7.42	-0.71	-90.2128	1	5	0.22
978	Ayora	Sep	2002	21.4	Day	Landing	Santa Cruz	Santa Cruz	Centre- South	21.2	-0.654	-90.5493	2	6	1.833333333
979	Ayora	Sep	2002	21.4	Night	Landing	Santa Cruz	Santa Cruz	Centre- South	14.6	-0.7236	-90.4896	1	3	3
980	Ayora	Sep	2002	21.4	Day	Landing	Santa Cruz	Santa Cruz	Centre- South	7.42	-0.71	-90.2128	1	5	2.2
981	Ayora	Sep	2002	21.4	Night	Landing	Santa Cruz	Santa Cruz	Centre- South	39.5	-0.4888	-90.347	2	4	1.25
982	Ayora	Sep	2002	21.4	Day	Landing	Santa Cruz	Santa Cruz	Centre- South	14	-0.73309	-90.4665	1	8	5.175
983	Ayora	Sep	2002	21.4	Night	Landing	Santa Cruz	Santa Cruz	Centre- South	9.51	-0.75504	-90.42136	1	3	1.966666667
984	Ayora	Sep	2002	21.4	Night	Landing	Santa Cruz	Santa Cruz	Centre- South	9.51	-0.75504	-90.42136	1	6	0.75
985	Ayora	Sep	2002	21.4	Night	Landing	Santa Cruz	Santa Cruz	Centre- South	9.51	-0.75504	-90.42136	1	3	0.9
986	Ayora	Sep	2002	21.4	Night	Landing	Santa Cruz	Santa Cruz	Centre- South	24.6	-0.4984	-90.2414	1	16	1.1625
987	Ayora	Sep	2002	21.4	Night	Landing	Santa Cruz	Santa Cruz	Centre- South	13	-0.74564	-90.44894	1	6	0.75
988	Ayora	Sep	2002	21.4	Day	Landing	Santa Cruz	Santa Cruz	Centre- South	11.3	-0.7485	-90.4464	1	3	1.733333333
989	Ayora	Sep	2002	21.4	Night	Landing	Santa Cruz	Santa Cruz	Centre- South	13	-0.74564	-90.44894	1	7	4.085714286
990	Ayora	Sep	2002	21.4	Night	Landing	Santa Cruz	Santa Cruz	Centre- South	9.51	-0.75504	-90.42136	1	3	1.3
991	Ayora	Sep	2002	21.4	Night	Landing	Santa Cruz	Santa Cruz	Centre- South	21.2	-0.654	-90.5493	1	4	2.375
992	Ayora	Sep	2002	21.4	Night	Landing	Santa Cruz	Santa Cruz	Centre- South	14.6	-0.7236	-90.4896	1	4	1.3
993	Ayora	Sep	2002	21.4	Night	Landing	Santa Cruz	Santa Cruz	Centre- South	14.6	-0.7236	-90.4896	1	5	4.6
994	Ayora	Sep	2002	21.4	Night	Landing	Santa Cruz	Santa Cruz	Centre- South	17.4	-0.7097	-90.5209	1	5	1.72
995	Ayora	Sep	2002	21.4	Night	Landing	Santa Cruz	Santa Cruz	Centre- South	21.2	-0.654	-90.5493	2	3	1.616666667
996	Ayora	Sep	2002	21.4	Night	Landing	Santa Cruz	Santa Cruz	Centre- South	14	-0.73309	-90.4665	1	4	0.85
997	Ayora	Sep	2002	21.4	Night	Landing	Santa Cruz	Santa Cruz	Centre- South	21.2	-0.654	-90.5493	1	12	0.716666667
998	Ayora	Sep	2002	21.4	Night	Landing	Santa Cruz	Santa Cruz	Centre- South	23.6	-0.6042	-90.5411	1	15	0.573333333
999	Ayora	Sep	2002	21.4	Night	Landing	Santa Cruz	Santa Cruz	Centre- South	11.3	-0.7485	-90.4464	1	2	2.6
1000	Ayora	Sep	2002	21.4	Day	Landing	Santa Cruz	Santa Cruz	Centre- South	7.42	-0.71	-90.2128	1	3	0.166666667
1001	Ayora	Sep	2002	21.4	Day	Landing	Santa Cruz	Santa Cruz	Centre- South	14.6	-0.7236	-90.4896	1	6	0.833333333
1002	Ayora	Sep	2002	21.4	Day	Landing	Santa Cruz	Santa Cruz	Centre- South	7.42	-0.71	-90.2128	1	5	1.2
1003	Ayora	Sep	2002	21.4	Day	Observer	Santa Cruz	Santa Cruz	Centre- South	14	-0.66121	-90.1773	1	4	0.8
1004	Ayora	Sep	2002	21.4	Night	Landing	Santa Cruz	Santa Cruz	Centre- South	14.6	-0.7236	-90.4896	2	2.5	1.72
1005	Ayora	Sep	2002	21.4	Night	Landing	Santa Cruz	Santa Cruz	Centre- South	14.6	-0.7236	-90.4896	1	4	2.25
1006	Ayora	Sep	2002	21.4	Day	Landing	Santa Cruz	Santa Cruz	Centre- South	7.42	-0.71	-90.2128	1	4	0.9
1007	Ayora	Sep	2002	21.4	Night	Landing	Santa Cruz	Santa Cruz	Centre- South	14	-0.73309	-90.4665	1	4	5.625
1008	Ayora	Sep	2002	21.4	Night	Landing	Santa Cruz	Santa Cruz	Centre- South	21.2	-0.654	-90.5493	1	4	0.675
1009	Ayora	Sep	2002	21.4	Day	Landing	Santa Cruz	Santa Cruz	Centre- South	7.42	-0.71	-90.2128	1	4	0.05
1010	Ayora	Sep	2002	21.4	Night	Landing	Santa Cruz	Santa Cruz	Centre- South	24.6	0.06442	-91.50484	7	5	1
1011	Ayora	Sep	2002	21.3	Night	Landing	Santa Fe	Santa Fe	Centre- South	14.8	-0.795	-90.0667	1	6	1.25
1012	Ayora	Sep	2002	21.3	Night	Landing	Santa Fe	Santa Fe	Centre- South	14.8	-0.795	-90.0667	2	6	1.058333333
1013	Ayora	Sep	2002	21.3	Night	Landing	Santa Fe	Santa Fe	Centre- South	17.5	-0.8404	-90.0434	1	6	1.5
1014	Ayora	Sep	2002	21.3	Day	Landing	Santa Fe	Santa Fe	Centre- South	18.5	-0.82133	-90.02925	1	4	0.55
1015	Ayora	Sep	2002	21.3	Day	Landing	Santa Fe	Santa Fe	Centre- South	18.5	-0.82133	-90.02925	1	6	0.666666667
1016	Ayora	Sep	2002	21.3	Night	Landing	Santa Fe	Santa Fe	Centre- South	14.8	-0.795	-90.0667	1	4	1.6
1017	Baquerizo	Sep	2002	21.3	Night	Landing	Santa Fe	Santa Fe	Centre- South	29.8	-0.82133	-90.02925	1	8	1.795
1018	Baquerizo	Sep	2002	21.3	Night	Observer	Santa Fe	Santa Fe	Centre- South	29.8	-0.80421	-90.03904	2	5	1.96
1019	Baquerizo	Sep	2002	21.3	Night	Observer	Santa Fe	Santa Fe	Centre- South	30.2	-0.80421	-90.03904	2	6	0.819444444
1020	Baquerizo	Sep	2002	21.3	Night	Observer	Santa Fe	Santa Fe	Centre- South	31.2	-0.79671	-90.0531	1	8	2.8375
1021	Baquerizo	Sep	2002	21.3	Night	Observer	Santa Fe	Santa Fe	Centre- South	30.2	-0.8404	-90.0434	2	6	0.641666667
1022	Baquerizo	Sep	2002	21.3	Night	Observer	Santa Fe	Santa Fe	Centre- South	31.2	-0.78671	-90.0531	1	4	0.9
1023	Baquerizo	Sep	2002	21.3	Night	Observer	Santa Fe	Santa Fe	Centre- South	30.2	-0.8404	-90.0434	1	5	1.08
1024	Ayora	Sep	2002	22.4	Day	Observer	Santiago	Santiago	Centre- South	40.6	-0.3518	-90.6716	1	5	2.2
1025	Ayora	Sep	2002	22.4	Day	Observer	Santiago	Santiago	Centre- South	51.3	-0.28955	-90.92695	1	6	2.166666667
1026	Ayora	Sep	2002	22.4	Day	Observer	Santiago	Santiago	Centre- South	51.3	-0.28955	-90.92695	2	5	0.8
1027	Ayora	Sep	2002	22.4	Night	Observer	Santiago	Santiago	Centre- South	51.3	-0.28955	-90.92695	2	2	0.75
1028	Ayora	Sep	2002	22.4	Day	Landing	Santiago	Santiago	Centre- South	49.9	-0.23399	-90.58126	1	10	1.935
1029	Ayora	Sep	2002	22.4	Night	Landing	Santiago	Santiago	Centre- South	40.6	-0.3518	-90.6716	1	12	3.708333333
1030	Ayora	Sep	2002	22.4	Day	Landing	Santiago	Santiago	Centre- South	51.3	-0.28955	-90.92695	2	6	0.416666667
1031	Ayora	Sep	2002	22.4	Day	Landing	Santiago	Santiago	Centre- South	45.8	-0.1917	-90.6472	2	15	0.56
1032	Ayora	Sep	2002	22.4	Day	Observer	Santiago	Santiago	Centre- South	51.3	-0.28955	-90.92695	2	5	0.1
1033	Ayora	Sep	2002	22.4	Night	Observer	Santiago	Santiago	Centre- South	40.6	-0.3518	-90.6716	2	3	1.333333333
1034	Ayora	Sep	2002	22.4	Night	Observer	Santiago	Santiago	Centre- South	51.3	-0.28955	-90.92695	2	2	0.25
1035	Ayora	Sep	2002	22.4	Night	Landing	Santiago	Santiago	Centre- South	60.4	-0.435	-90.701	1	3	2.7
1036	Ayora	Sep	2002	22.4	Night	Landing	Santiago	Santiago	Centre- South	60.2	-0.1647	-90.8354	1	3	3.8
1037	Ayora	Sep	2002	22.4	Night	Landing	Santiago	Santiago	Centre- South	59	-0.17171	-90.83148	1	2	2.75
1038	Ayora	Sep	2002	22.4	Night	Landing	Santiago	Santiago	Centre- South	60.4	-0.15665	-90.73737	2	4	0.75
1039	Ayora	Sep	2002	22.4	Night	Landing	Santiago	Santiago	Centre- South	60.4	-0.15665	-90.73737	2	3	1.433333333
1040	Ayora	Sep	2002	22.4	Night	Landing	Santiago	Santiago	Centre- South	51.3	-0.28955	-90.92695	2	2	0.575
1041	Ayora	Sep	2002	22.4	Night	Landing	Santiago	Santiago	Centre- South	51.3	-0.28955	-90.92695	2	2.5	0.82
1042	Ayora	Sep	2002	22.4	Night	Landing	Santiago	Santiago	Centre- South	60.2	-0.1647	-90.8354	2	4	1.0125
1043	Ayora	Sep	2002	22.4	Night	Landing	Santiago	Santiago	Centre- South	60.4	-0.15665	-90.73737	2	4	0.6875
1044	Ayora	Sep	2002	22.4	Night	Landing	Santiago	Santiago	Centre- South	51.3	-0.28955	-90.92695	2	2	1.375
1045	Ayora	Sep	2002	22.4	Night	Landing	Santiago	Santiago	Centre- South	60.2	-0.1647	-90.8354	2	4	3.5
1046	Ayora	Sep	2002	22.4	Night	Landing	Santiago	Santiago	Centre- South	60.4	-0.15665	-90.73737	2	4	1.1875
1047	Baquerizo	Sep	2002	22.4	Night	Observer	Santiago	Santiago	Centre- South	103	-0.1647	-90.8354	1	7	2.397142857
1048	Baquerizo	Sep	2002	22.4	Night	Observer	Santiago	Santiago	Centre- South	103	-0.1647	-90.8354	1	4	0.7925
1049	Baquerizo	Sep	2002	22.4	Night	Observer	Santiago	Santiago	Centre- South	82.3	-0.16729	-90.71373	2	5	1.451
1050	Baquerizo	Sep	2002	22.4	Night	Observer	Santiago	Santiago	Centre- South	103	-0.1647	-90.8354	1	6	1.586666667
1051	Baquerizo	Sep	2002	22.4	Night	Observer	Santiago	Santiago	Centre- South	82.3	-0.23399	-90.58126	1	5	1.904
1052	Baquerizo	Sep	2002	22.4	Night	Observer	Santiago	Santiago	Centre- South	103	-0.1647	-90.8354	1	6	1.511666667
1053	Baquerizo	Sep	2002	22.4	Night	Observer	Santiago	Santiago	Centre- South	82.3	-0.17382	-90.69905	1	6	2.645
1054	Baquerizo	Sep	2002	22.4	Night	Observer	Santiago	Santiago	Centre- South	103	-0.1647	-90.8354	1	6	1.135
1055	Baquerizo	Sep	2002	22.4	Night	Observer	Santiago	Santiago	Centre- South	103	-0.1647	-90.8354	1	6	1.133333333
1056	Baquerizo	Sep	2002	22.4	Night	Observer	Santiago	Santiago	Centre- South	82.3	-0.23399	-90.58126	2	1	5.665
1057	Baquerizo	Sep	2002	22.4	Night	Observer	Santiago	Santiago	Centre- South	103	-0.1647	-90.8354	2	7	1.327857143
1058	Baquerizo	Sep	2002	22.4	Night	Observer	Santiago	Santiago	Centre- South	103	-0.1647	-90.8354	2	6	2.154166667
1059	Baquerizo	Sep	2002	22.4	Night	Observer	Santiago	Santiago	Centre- South	82.3	-0.23399	-90.58126	8	32	0.317070313
1060	Baquerizo	Sep	2002	22.4	Night	Observer	Santiago	Santiago	Centre- South	103	-0.1647	-90.8354	8	36	0.152743056
1061	Baquerizo	Oct	2002	22.1	Day	Landing	San Cristobal N y O	San Cristobal	Centre- South	22	-0.683	-89.3279	1	8	2.38625
1062	Baquerizo	Oct	2002	22.1	Night	Observer	San Cristobal N y O	San Cristobal	Centre- South	12.8	-0.75834	-89.464445	1	6	1.056666667
1063	Baquerizo	Oct	2002	22.1	Day	Landing	San Cristobal N y O	San Cristobal	Centre- South	22	-0.683	-89.3279	1	6	0.435
1064	Baquerizo	Oct	2002	22.1	Day	Landing	San Cristobal N y O	San Cristobal	Centre- South	22	-0.683	-89.3279	2	5	0.101
1065	Baquerizo	Oct	2002	22.1	Night	Landing	San Cristobal N y O	San Cristobal	Centre- South	19.8	-0.7042	-89.3752	1	3	0.753333333
1066	Baquerizo	Oct	2002	23	Day	Landing	San Cristobal S y E	San Cristobal	Centre- South	26.2	-0.8626	-89.367	1	8	0.4525
1067	Baquerizo	Oct	2002	23	Day	Landing	San Cristobal S y E	San Cristobal	Centre- South	27.8	-0.842495	-89.352716	1	8	0.22625
1068	Baquerizo	Oct	2002	23	Night	Landing	San Cristobal S y E	San Cristobal	Centre- South	5.41	-0.94788	-89.58696	2	6	0.36
1069	Baquerizo	Oct	2002	23	Night	Landing	San Cristobal S y E	San Cristobal	Centre- South	11.2	-0.9497	-89.4963	1	7	0.614285714
1070	Baquerizo	Oct	2002	23	Night	Landing	San Cristobal S y E	San Cristobal	Centre- South	8.25	-0.95585	-89.5428	1	5	0.94
1071	Baquerizo	Oct	2002	23	Night	Landing	San Cristobal S y E	San Cristobal	Centre- South	11.2	-0.9497	-89.4963	2	4	0.417916667
1072	Baquerizo	Oct	2002	23	Day	Landing	San Cristobal S y E	San Cristobal	Centre- South	17.4	-0.9254	-89.4113	2	8	0.425
1073	Baquerizo	Oct	2002	23	Night	Landing	San Cristobal S y E	San Cristobal	Centre- South	17.4	-0.9254	-89.4113	1	7	0.366666667
1074	Baquerizo	Oct	2002	23	Night	Landing	San Cristobal S y E	San Cristobal	Centre- South	26	-0.71267	-89.2403	1	5	3.76
1075	Baquerizo	Oct	2002	23	Night	Landing	San Cristobal S y E	San Cristobal	Centre- South	5.41	-0.94788	-89.58696	1	6	0.477777778
1076	Baquerizo	Oct	2002	23	Night	Landing	San Cristobal S y E	San Cristobal	Centre- South	5.41	-0.94788	-89.58696	1	4	0.490833333
1077	Baquerizo	Oct	2002	23	Night	Landing	San Cristobal S y E	San Cristobal	Centre- South	17.4	-0.9254	-89.4113	1	5	1.269333333
1078	Baquerizo	Oct	2002	23	Night	Landing	San Cristobal S y E	San Cristobal	Centre- South	17.4	-0.9254	-89.4113	1	5	0.84
1079	Baquerizo	Oct	2002	23	Night	Landing	San Cristobal S y E	San Cristobal	Centre- South	17.4	-0.9254	-89.4113	1	4	2.2675
1080	Baquerizo	Oct	2002	23	Day	Landing	San Cristobal S y E	San Cristobal	Centre- South	5.41	-0.94788	-89.58696	2	6	0.45
1081	Baquerizo	Oct	2002	23	Night	Landing	San Cristobal S y E	San Cristobal	Centre- South	6.1	-0.9409	-89.5906	1	5	0.612666667
1082	Baquerizo	Oct	2002	23	Night	Landing	San Cristobal S y E	San Cristobal	Centre- South	6.1	-0.9409	-89.5906	1	5	0.324666667
1083	Baquerizo	Oct	2002	23	Night	Landing	San Cristobal S y E	San Cristobal	Centre- South	5.41	-0.94788	-89.58696	1	4	0.4975
1084	Baquerizo	Oct	2002	23	Day	Landing	San Cristobal S y E	San Cristobal	Centre- South	17.4	-0.9254	-89.4113	2	7	0.12
1085	Baquerizo	Oct	2002	23	Day	Landing	San Cristobal S y E	San Cristobal	Centre- South	26.2	-0.8626	-89.367	1	8	0.85
1086	Baquerizo	Oct	2002	23	Day	Landing	San Cristobal S y E	San Cristobal	Centre- South	27.8	-0.842495	-89.352716	2	7	0.420714286
1087	Baquerizo	Oct	2002	23	Day	Landing	San Cristobal S y E	San Cristobal	Centre- South	27.8	-0.842495	-89.352716	2	6	0.736666667
1088	Baquerizo	Oct	2002	23	Night	Landing	San Cristobal S y E	San Cristobal	Centre- South	17.4	-0.9254	-89.4113	2	4	0.283333333
1089	Baquerizo	Oct	2002	23	Night	Landing	San Cristobal S y E	San Cristobal	Centre- South	17.4	-0.9254	-89.4113	1	4	0.941666667
1090	Baquerizo	Oct	2002	23	Night	Landing	San Cristobal S y E	San Cristobal	Centre- South	17.4	-0.9254	-89.4113	2	8	0.708333333
1091	Baquerizo	Oct	2002	23	Night	Landing	San Cristobal S y E	San Cristobal	Centre- South	5.41	-0.94788	-89.58696	1	4	0.566666667
1092	Baquerizo	Oct	2002	23	Night	Landing	San Cristobal S y E	San Cristobal	Centre- South	6.1	-0.9409	-89.5906	2	3	0.955555556
1093	Baquerizo	Oct	2002	23	Day	Landing	San Cristobal S y E	San Cristobal	Centre- South	26	-0.71267	-89.2403	1	3	3.766666667
1094	Baquerizo	Oct	2002	23	Night	Landing	San Cristobal S y E	San Cristobal	Centre- South	6.1	-0.9409	-89.5906	1	3	1.511111111
1095	Baquerizo	Oct	2002	23	Night	Landing	San Cristobal S y E	San Cristobal	Centre- South	6.1	-0.9409	-89.5906	2	6	1.965
1096	Baquerizo	Oct	2002	23	Night	Observer	San Cristobal S y E	San Cristobal	Centre- South	5.41	-0.94025	-89.58892	1	6	1.133333333
1097	Baquerizo	Oct	2002	23	Night	Landing	San Cristobal S y E	San Cristobal	Centre- South	5.41	-0.94788	-89.58696	1	7	0.973809524
1098	Baquerizo	Oct	2002	23	Night	Landing	San Cristobal S y E	San Cristobal	Centre- South	9.5	-0.9557	-89.5197	1	6	1.363333333
1099	Baquerizo	Oct	2002	23	Night	Landing	San Cristobal S y E	San Cristobal	Centre- South	15.5	-0.93575	-89.43985	1	8	1.5625
1100	Baquerizo	Oct	2002	23	Night	Landing	San Cristobal S y E	San Cristobal	Centre- South	32.6	-0.674	-89.248	1	7	3.657142857
1101	Baquerizo	Oct	2002	23	Day	Landing	San Cristobal S y E	San Cristobal	Centre- South	27.8	-0.842495	-89.352716	1	5	0.92
1102	Baquerizo	Oct	2002	23	Night	Landing	San Cristobal S y E	San Cristobal	Centre- South	6.1	-0.9409	-89.5906	1	4	0.7575
1103	Baquerizo	Oct	2002	23	Night	Landing	San Cristobal S y E	San Cristobal	Centre- South	11.2	-0.9497	-89.4963	1	7	0.973809524
1104	Baquerizo	Oct	2002	23	Night	Landing	San Cristobal S y E	San Cristobal	Centre- South	5.41	-0.94788	-89.58696	1	5	2.757333333
1105	Baquerizo	Oct	2002	23	Night	Landing	San Cristobal S y E	San Cristobal	Centre- South	17.4	-0.9254	-89.4113	2	8	0.5375
1106	Baquerizo	Oct	2002	23	Night	Landing	San Cristobal S y E	San Cristobal	Centre- South	5.41	-0.94788	-89.58696	1	8	1.5875
1107	Baquerizo	Oct	2002	23	Night	Landing	San Cristobal S y E	San Cristobal	Centre- South	12.9	-0.9554	-89.5136	1	8	1.42
1108	Baquerizo	Oct	2002	23	Night	Landing	San Cristobal S y E	San Cristobal	Centre- South	11.2	-0.9497	-89.4963	2	5	1.727
1109	Baquerizo	Oct	2002	23	Night	Landing	San Cristobal S y E	San Cristobal	Centre- South	17.4	-0.9254	-89.4113	2	5	1.636
1110	Baquerizo	Oct	2002	23	Night	Landing	San Cristobal S y E	San Cristobal	Centre- South	27.8	-0.842495	-89.352716	2	20	1.0795
1111	Baquerizo	Oct	2002	23	Night	Landing	San Cristobal S y E	San Cristobal	Centre- South	27.8	-0.842495	-89.352716	2	15	1.924
1112	Baquerizo	Oct	2002	23	Night	Landing	San Cristobal S y E	San Cristobal	Centre- South	27.8	-0.842495	-89.352716	2	15	0.536666667
1113	Baquerizo	Oct	2002	23	Day	Landing	San Cristobal S y E	San Cristobal	Centre- South	27.8	-0.842495	-89.352716	2	15	1.233333333
1114	Baquerizo	Oct	2002	23	Night	Landing	San Cristobal S y E	San Cristobal	Centre- South	27.8	-0.842495	-89.352716	1	15	2.46
1115	Ayora	Oct	2002	21.7	Night	Landing	Santa Cruz	Santa Cruz	Centre- South	14.6	-0.7236	-90.4896	1	4	0.9
1116	Ayora	Oct	2002	21.7	Day	Landing	Santa Cruz	Santa Cruz	Centre- South	5.62	-0.7354	-90.2324	1	4	1.925
1117	Ayora	Oct	2002	21.7	Day	Landing	Santa Cruz	Santa Cruz	Centre- South	5.62	-0.7354	-90.2324	1	4	0.6
1118	Ayora	Oct	2002	21.7	Day	Landing	Santa Cruz	Santa Cruz	Centre- South	9.51	-0.75504	-90.42136	2	5	2.3
1119	Ayora	Oct	2002	21.7	Day	Landing	Santa Cruz	Santa Cruz	Centre- South	38.6	-0.49725	-90.371	1	4	2.75
1120	Ayora	Oct	2002	21.7	Night	Landing	Santa Cruz	Santa Cruz	Centre- South	21.2	-0.654	-90.5493	1	4	0.8
1121	Ayora	Oct	2002	21.7	Night	Landing	Santa Cruz	Santa Cruz	Centre- South	14.6	-0.7236	-90.4896	1	4	2.75
1122	Ayora	Oct	2002	21.7	Night	Landing	Santa Cruz	Santa Cruz	Centre- South	11.3	-0.7485	-90.4464	2	3	1.466666667
1123	Ayora	Oct	2002	21.7	Night	Landing	Santa Cruz	Santa Cruz	Centre- South	14.6	-0.7236	-90.4896	2	4.5	1.166666667
1124	Ayora	Oct	2002	21.7	Day	Landing	Santa Cruz	Santa Cruz	Centre- South	7.42	-0.71	-90.2128	2	3	0.983333333
1125	Ayora	Oct	2002	21.7	Night	Landing	Santa Cruz	Santa Cruz	Centre- South	11.3	-0.7485	-90.4464	1	4	1.75
1126	Ayora	Oct	2002	21.7	Night	Landing	Santa Cruz	Santa Cruz	Centre- South	13	-0.74564	-90.44894	1	4	2.2
1127	Ayora	Oct	2002	21.7	Night	Landing	Santa Cruz	Santa Cruz	Centre- South	13	-0.74564	-90.44894	1	4	2.5
1128	Ayora	Oct	2002	21.7	Day	Landing	Santa Cruz	Santa Cruz	Centre- South	14	-0.73309	-90.4665	1	5	1.6
1129	Ayora	Oct	2002	21.7	Day	Landing	Santa Cruz	Santa Cruz	Centre- South	14.6	-0.7236	-90.4896	2	8	1.59375
1130	Ayora	Oct	2002	21.7	Night	Landing	Santa Cruz	Santa Cruz	Centre- South	14.6	-0.7236	-90.4896	1	5	2
1131	Ayora	Oct	2002	21.7	Night	Landing	Santa Cruz	Santa Cruz	Centre- South	9.51	-0.75504	-90.42136	2	4	0.45
1132	Ayora	Oct	2002	21.7	Night	Landing	Santa Cruz	Santa Cruz	Centre- South	14.6	-0.7236	-90.4896	1	4	4.325
1133	Ayora	Oct	2002	21.7	Day	Landing	Santa Cruz	Santa Cruz	Centre- South	7.42	-0.71	-90.2128	1	4	0.575
1134	Ayora	Oct	2002	21.7	Night	Landing	Santa Cruz	Santa Cruz	Centre- South	5.62	-0.7354	-90.2324	1	4	1.125
1135	Ayora	Oct	2002	21.7	Night	Landing	Santa Cruz	Santa Cruz	Centre- South	14.6	-0.7236	-90.4896	2	4.5	1.533333333
1136	Ayora	Oct	2002	21.7	Night	Landing	Santa Cruz	Santa Cruz	Centre- South	14.6	-0.7236	-90.4896	1	4	3.625
1137	Ayora	Oct	2002	21.7	Night	Landing	Santa Cruz	Santa Cruz	Centre- South	13	-0.74564	-90.44894	2	3.5	0.257142857
1138	Ayora	Oct	2002	21.7	Day	Landing	Santa Cruz	Santa Cruz	Centre- South	11.3	-0.7485	-90.4464	1	3	0.433333333
1139	Ayora	Oct	2002	21.7	Day	Landing	Santa Cruz	Santa Cruz	Centre- South	11.3	-0.7485	-90.4464	2	4	0.375
1140	Ayora	Oct	2002	21.7	Day	Landing	Santa Cruz	Santa Cruz	Centre- South	11.3	-0.7485	-90.4464	1	5	0.68
1141	Ayora	Oct	2002	21.7	Day	Landing	Santa Cruz	Santa Cruz	Centre- South	11.3	-0.7485	-90.4464	1	5	1.2
1142	Ayora	Oct	2002	21.7	Night	Landing	Santa Cruz	Santa Cruz	Centre- South	14.6	-0.7236	-90.4896	1	4	5.3
1143	Ayora	Oct	2002	21.7	Day	Landing	Santa Cruz	Santa Cruz	Centre- South	10	-0.68739	-90.19251	1	4	1.7
1144	Ayora	Oct	2002	21.7	Night	Landing	Santa Cruz	Santa Cruz	Centre- South	11.3	-0.7485	-90.4464	1	1	3.2
1145	Ayora	Oct	2002	21.7	Day	Landing	Santa Cruz	Santa Cruz	Centre- South	9.51	-0.75504	-90.42136	1	3	0.666666667
1146	Ayora	Oct	2002	21.7	Day	Landing	Santa Cruz	Santa Cruz	Centre- South	9.51	-0.75504	-90.42136	1	4	1.375
1147	Ayora	Oct	2002	21.7	Day	Landing	Santa Cruz	Santa Cruz	Centre- South	11.3	-0.7485	-90.4464	2	3	0.566666667
1148	Ayora	Oct	2002	21.7	Day	Landing	Santa Cruz	Santa Cruz	Centre- South	10	-0.68739	-90.19251	1	4	1.125
1149	Ayora	Oct	2002	21.7	Night	Landing	Santa Cruz	Santa Cruz	Centre- South	14	-0.73309	-90.4665	1	4	1.925
1150	Ayora	Oct	2002	21.7	Day	Landing	Santa Cruz	Santa Cruz	Centre- South	13	-0.74564	-90.44894	1	4	0.35
1151	Ayora	Oct	2002	21.7	Day	Landing	Santa Cruz	Santa Cruz	Centre- South	9.51	-0.75504	-90.42136	1	7	0.328571429
1152	Ayora	Oct	2002	21.7	Day	Landing	Santa Cruz	Santa Cruz	Centre- South	11.3	-0.7485	-90.4464	1	4	1.75
1153	Ayora	Oct	2002	21.7	Day	Landing	Santa Cruz	Santa Cruz	Centre- South	11.3	-0.7485	-90.4464	1	7	0.757142857
1154	Ayora	Oct	2002	21.7	Day	Landing	Santa Cruz	Santa Cruz	Centre- South	11.3	-0.7485	-90.4464	1	7	0.614285714
1155	Ayora	Oct	2002	21.7	Day	Landing	Santa Cruz	Santa Cruz	Centre- South	9.51	-0.75504	-90.42136	1	4	0.375
1156	Ayora	Oct	2002	21.7	Day	Landing	Santa Cruz	Santa Cruz	Centre- South	11.3	-0.7485	-90.4464	1	5	1.46
1157	Ayora	Oct	2002	21.7	Day	Landing	Santa Cruz	Santa Cruz	Centre- South	9.51	-0.75504	-90.42136	1	4	1.075
1158	Ayora	Oct	2002	21.7	Day	Landing	Santa Cruz	Santa Cruz	Centre- South	9.51	-0.75504	-90.42136	1	5	0.36
1159	Ayora	Oct	2002	21.7	Night	Landing	Santa Cruz	Santa Cruz	Centre- South	9.51	-0.75504	-90.42136	1	8	3.125
1160	Ayora	Oct	2002	21.7	Day	Landing	Santa Cruz	Santa Cruz	Centre- South	21.2	-0.654	-90.5493	1	6	0.983333333
1161	Ayora	Oct	2002	21.7	Day	Landing	Santa Cruz	Santa Cruz	Centre- South	7.42	-0.71	-90.2128	1	3	0.766666667
1162	Ayora	Oct	2002	21.7	Night	Landing	Santa Cruz	Santa Cruz	Centre- South	14	-0.73309	-90.4665	1	4	1.025
1163	Ayora	Oct	2002	21.7	Night	Landing	Santa Cruz	Santa Cruz	Centre- South	14.6	-0.7236	-90.4896	1	18	2
1164	Ayora	Oct	2002	21.7	Night	Landing	Santa Cruz	Santa Cruz	Centre- South	9.51	-0.75504	-90.42136	1	10	2.55
1165	Ayora	Oct	2002	21.7	Day	Landing	Santa Cruz	Santa Cruz	Centre- South	11.3	-0.7485	-90.4464	2	4	0.175
1166	Ayora	Oct	2002	21.7	Night	Landing	Santa Cruz	Santa Cruz	Centre- South	11.3	-0.7485	-90.4464	2	5	1.18
1167	Ayora	Oct	2002	21.7	Night	Landing	Santa Cruz	Santa Cruz	Centre- South	13	-0.74564	-90.44894	1	8	2.2625
1168	Ayora	Oct	2002	21.7	Day	Landing	Santa Cruz	Santa Cruz	Centre- South	11.3	-0.7485	-90.4464	2	3	0.916666667
1169	Ayora	Oct	2002	21.7	Night	Landing	Santa Cruz	Santa Cruz	Centre- South	14.6	-0.7236	-90.4896	1	10	0.45
1170	Ayora	Oct	2002	21.7	Night	Landing	Santa Cruz	Santa Cruz	Centre- South	9.51	-0.75504	-90.42136	1	3	1.233333333
1171	Ayora	Oct	2002	21.7	Day	Landing	Santa Cruz	Santa Cruz	Centre- South	9.51	-0.75504	-90.42136	1	5	0.74
1172	Ayora	Oct	2002	21.7	Day	Landing	Santa Cruz	Santa Cruz	Centre- South	11.3	-0.7485	-90.4464	1	3	0.133333333
1173	Ayora	Oct	2002	21.7	Night	Landing	Santa Cruz	Santa Cruz	Centre- South	11.3	-0.7485	-90.4464	1	3	4.9
1174	Ayora	Oct	2002	21.7	Night	Landing	Santa Cruz	Santa Cruz	Centre- South	11.3	-0.7485	-90.4464	1	4	5
1175	Ayora	Oct	2002	21.7	Night	Landing	Santa Cruz	Santa Cruz	Centre- South	14	-0.73309	-90.4665	1	5	4.3
1176	Ayora	Oct	2002	21.7	Day	Landing	Santa Cruz	Santa Cruz	Centre- South	9.51	-0.75504	-90.42136	1	4	1.5
1177	Ayora	Oct	2002	21.7	Day	Landing	Santa Cruz	Santa Cruz	Centre- South	2.78	-0.77996	-90.3263	1	3	1
1178	Ayora	Oct	2002	21.7	Day	Landing	Santa Cruz	Santa Cruz	Centre- South	11.3	-0.7485	-90.4464	1	4	0.8
1179	Ayora	Oct	2002	21.7	Night	Landing	Santa Cruz	Santa Cruz	Centre- South	5.62	-0.7354	-90.2324	1	4	0.9
1180	Ayora	Oct	2002	21.7	Day	Landing	Santa Cruz	Santa Cruz	Centre- South	7.42	-0.71	-90.2128	1	4	0.4
1181	Ayora	Oct	2002	21.7	Day	Landing	Santa Cruz	Santa Cruz	Centre- South	9.51	-0.75504	-90.42136	2	2.5	0.4
1182	Ayora	Oct	2002	21.7	Night	Landing	Santa Cruz	Santa Cruz	Centre- South	21.2	-0.654	-90.5493	1	3	1.5
1183	Ayora	Oct	2002	21.7	Night	Landing	Santa Cruz	Santa Cruz	Centre- South	14.6	-0.7236	-90.4896	1	3	1.5
1184	Ayora	Oct	2002	21.7	Night	Landing	Santa Cruz	Santa Cruz	Centre- South	13.8	-0.73309	-90.4665	1	24	0.708333333
1185	Ayora	Oct	2002	21.7	Day	Landing	Santa Cruz	Santa Cruz	Centre- South	11.3	-0.7485	-90.4464	1	4	0.725
1186	Ayora	Oct	2002	21.7	Night	Observer	Santa Cruz	Santa Cruz	Centre- South	9.51	-0.77244	-90.35177	1	3	1.833333333
1187	Ayora	Oct	2002	21.7	Night	Observer	Santa Cruz	Santa Cruz	Centre- South	11.3	-0.76013	-90.42018	2	5	0.76
1188	Ayora	Oct	2002	21.7	Night	Landing	Santa Cruz	Santa Cruz	Centre- South	11.3	-0.7485	-90.4464	2	2	1.25
1189	Ayora	Oct	2002	21.7	Night	Landing	Santa Cruz	Santa Cruz	Centre- South	9.51	-0.75504	-90.42136	1	4	1
1190	Ayora	Oct	2002	21.7	Night	Landing	Santa Cruz	Santa Cruz	Centre- South	17.4	-0.7097	-90.5209	1	8	1.7
1191	Ayora	Oct	2002	21.7	Night	Landing	Santa Cruz	Santa Cruz	Centre- South	9.51	-0.75504	-90.42136	1	5	0.8
1192	Ayora	Oct	2002	21.7	Night	Landing	Santa Cruz	Santa Cruz	Centre- South	9.51	-0.75504	-90.42136	1	6	1.5
1193	Ayora	Oct	2002	21.7	Day	Landing	Santa Cruz	Santa Cruz	Centre- South	9.51	-0.75504	-90.42136	2	6	0.058333333
1194	Ayora	Oct	2002	21.7	Day	Landing	Santa Cruz	Santa Cruz	Centre- South	9.51	-0.75504	-90.42136	1	5	0.72
1195	Ayora	Oct	2002	21.7	Night	Landing	Santa Cruz	Santa Cruz	Centre- South	11.3	-0.7485	-90.4464	1	3	3.333333333
1196	Ayora	Oct	2002	21.7	Day	Landing	Santa Cruz	Santa Cruz	Centre- South	11.3	-0.7485	-90.4464	1	5	0.136
1197	Ayora	Oct	2002	21.7	Day	Landing	Santa Cruz	Santa Cruz	Centre- South	2.78	-0.77996	-90.3263	2	4	0.1375
1198	Ayora	Oct	2002	21.7	Night	Landing	Santa Cruz	Santa Cruz	Centre- South	11.3	-0.7485	-90.4464	1	5	5.72
1199	Ayora	Oct	2002	21.7	Night	Landing	Santa Cruz	Santa Cruz	Centre- South	7.42	-0.71	-90.2128	1	11	1.963636364
1200	Ayora	Oct	2002	21.7	Day	Landing	Santa Cruz	Santa Cruz	Centre- South	7.42	-0.71	-90.2128	1	4	0.675
1201	Ayora	Oct	2002	21.7	Day	Landing	Santa Cruz	Santa Cruz	Centre- South	24.6	-0.4984	-90.2414	1	14	1.328571429
1202	Ayora	Oct	2002	21.7	Day	Landing	Santa Cruz	Santa Cruz	Centre- South	11.3	-0.7485	-90.4464	1	5	0.7
1203	Ayora	Oct	2002	21.7	Day	Landing	Santa Cruz	Santa Cruz	Centre- South	9.51	-0.75504	-90.42136	1	4	0.375
1204	Ayora	Oct	2002	21.7	Day	Landing	Santa Cruz	Santa Cruz	Centre- South	7.42	-0.71	-90.2128	1	5	1.3
1205	Ayora	Oct	2002	21.7	Night	Landing	Santa Cruz	Santa Cruz	Centre- South	9.51	-0.75504	-90.42136	2	4	1.8125
1206	Ayora	Oct	2002	21.7	Night	Landing	Santa Cruz	Santa Cruz	Centre- South	9.51	-0.75504	-90.42136	1	5	0.7
1207	Ayora	Oct	2002	21.7	Night	Landing	Santa Cruz	Santa Cruz	Centre- South	21.2	-0.654	-90.5493	2	8	1.625
1208	Ayora	Oct	2002	21.7	Night	Landing	Santa Cruz	Santa Cruz	Centre- South	11.3	-0.7485	-90.4464	1	4	3.875
1209	Ayora	Oct	2002	21.7	Night	Landing	Santa Cruz	Santa Cruz	Centre- South	14.6	-0.7236	-90.4896	1	4	1.575
1210	Ayora	Oct	2002	21.7	Night	Landing	Santa Cruz	Santa Cruz	Centre- South	21.2	-0.654	-90.5493	2	6	1.375
1211	Ayora	Oct	2002	21.7	Night	Landing	Santa Cruz	Santa Cruz	Centre- South	14.6	-0.7236	-90.4896	1	5	4.86
1212	Ayora	Oct	2002	21.7	Night	Landing	Santa Cruz	Santa Cruz	Centre- South	14.6	-0.7236	-90.4896	2	4	1.75
1213	Ayora	Oct	2002	21.7	Night	Landing	Santa Cruz	Santa Cruz	Centre- South	14.6	-0.7236	-90.4896	1	4	5.25
1214	Ayora	Oct	2002	21.7	Night	Landing	Santa Cruz	Santa Cruz	Centre- South	14	-0.73309	-90.4665	2	12	0.083333333
1215	Ayora	Oct	2002	21.7	Day	Landing	Santa Cruz	Santa Cruz	Centre- South	11.3	-0.7485	-90.4464	1	1	3
1216	Ayora	Oct	2002	21.7	Day	Landing	Santa Cruz	Santa Cruz	Centre- South	14.6	-0.7236	-90.4896	2	5	1.3
1217	Ayora	Oct	2002	21.7	Day	Landing	Santa Cruz	Santa Cruz	Centre- South	13	-0.74564	-90.44894	1	4	0.75
1218	Ayora	Oct	2002	21.7	Night	Landing	Santa Cruz	Santa Cruz	Centre- South	14.6	-0.7236	-90.4896	1	4	2.125
1219	Ayora	Oct	2002	21.7	Day	Landing	Santa Cruz	Santa Cruz	Centre- South	7.42	-0.71	-90.2128	1	3	0.9
1220	Ayora	Oct	2002	21.7	Day	Landing	Santa Cruz	Santa Cruz	Centre- South	14	-0.73309	-90.4665	1	2	1
1221	Ayora	Oct	2002	21.7	Day	Landing	Santa Cruz	Santa Cruz	Centre- South	14.6	-0.7236	-90.4896	1	6	0.266666667
1222	Ayora	Oct	2002	21.7	Day	Landing	Santa Cruz	Santa Cruz	Centre- South	14	-0.73309	-90.4665	1	4	0.1125
1223	Ayora	Oct	2002	21.7	Day	Landing	Santa Cruz	Santa Cruz	Centre- South	9.51	-0.75504	-90.42136	1	4	0.675
1224	Ayora	Oct	2002	21.7	Day	Landing	Santa Cruz	Santa Cruz	Centre- South	14	-0.73309	-90.4665	1	6	0.566666667
1225	Ayora	Oct	2002	21.7	Day	Landing	Santa Cruz	Santa Cruz	Centre- South	11.3	-0.7485	-90.4464	1	5	0.6
1226	Ayora	Oct	2002	21.7	Day	Landing	Santa Cruz	Santa Cruz	Centre- South	13	-0.74564	-90.44894	1	4	0.55
1227	Ayora	Oct	2002	21.7	Day	Landing	Santa Cruz	Santa Cruz	Centre- South	9.51	-0.75504	-90.42136	1	4	1
1228	Ayora	Oct	2002	21.7	Day	Landing	Santa Cruz	Santa Cruz	Centre- South	9.51	-0.75504	-90.42136	1	4	0.375
1229	Ayora	Oct	2002	21.7	Day	Landing	Santa Cruz	Santa Cruz	Centre- South	9.51	-0.75504	-90.42136	1	5	0.8
1230	Ayora	Oct	2002	21.7	Day	Landing	Santa Cruz	Santa Cruz	Centre- South	9.51	-0.75504	-90.42136	1	4	0.5
1231	Ayora	Oct	2002	21.7	Day	Landing	Santa Cruz	Santa Cruz	Centre- South	7.42	-0.71	-90.2128	1	5	0.1
1232	Ayora	Oct	2002	21.7	Day	Landing	Santa Cruz	Santa Cruz	Centre- South	11.3	-0.7485	-90.4464	2	5	0.95
1233	Ayora	Oct	2002	21.7	Day	Landing	Santa Cruz	Santa Cruz	Centre- South	7.42	-0.71	-90.2128	1	4	0.75
1234	Ayora	Oct	2002	21.7	Day	Landing	Santa Cruz	Santa Cruz	Centre- South	11.3	-0.7485	-90.4464	2	4	0.2875
1235	Ayora	Oct	2002	21.7	Night	Observer	Santa Cruz	Santa Cruz	Centre- South	13	-0.75938	-90.42059	2	4	0.6
1236	Ayora	Oct	2002	21.7	Night	Observer	Santa Cruz	Santa Cruz	Centre- South	9.51	-0.77401	-90.36657	2	3	0.366666667
1237	Ayora	Oct	2002	21.7	Night	Observer	Santa Cruz	Santa Cruz	Centre- South	13.8	-0.74488	-90.45055	2	6	0.875
1238	Ayora	Oct	2002	21.7	Night	Observer	Santa Cruz	Santa Cruz	Centre- South	13.8	-0.73569	-90.45936	2	7	0.878571429
1239	Ayora	Oct	2002	21.7	Night	Observer	Santa Cruz	Santa Cruz	Centre- South	14.6	-0.7098	-90.51611	2	6	0.525
1240	Ayora	Oct	2002	21.7	Night	Landing	Santa Cruz	Santa Cruz	Centre- South	21.2	-0.654	-90.5493	1	5	1.8
1241	Ayora	Oct	2002	21.9	Night	Observer	Santiago	Santiago	Centre- South	59	-0.16382	-90.82388	2	8	1.8
1242	Ayora	Oct	2002	21.9	Night	Observer	Santiago	Santiago	Centre- South	39.9	-0.3674	-90.5841	2	4	0.170833333
1243	Ayora	Oct	2002	21.9	Night	Observer	Santiago	Santiago	Centre- South	59	-0.21452	-90.84006	2	5	0.18
1244	Ayora	Oct	2002	21.9	Night	Observer	Santiago	Santiago	Centre- South	39.9	-0.3674	-90.5841	2	6	0.35
1245	Ayora	Oct	2002	21.9	Day	Observer	Santiago	Santiago	Centre- South	59	-0.16786	-90.83315	2	4	1.125
1246	Ayora	Oct	2002	21.9	Night	Observer	Santiago	Santiago	Centre- South	60.2	-0.1647	-90.8354	2	5	2.36
1247	Ayora	Oct	2002	21.9	Night	Observer	Santiago	Santiago	Centre- South	39.9	-0.36733	-90.58542	2	5	0.23
1248	Ayora	Oct	2002	21.9	Day	Observer	Santiago	Santiago	Centre- South	59	-0.17171	-90.83148	6	5	3.973333333
1249	Ayora	Oct	2002	21.9	Night	Observer	Santiago	Santiago	Centre- South	60.2	-0.1647	-90.8354	6	5	2.35
1250	Ayora	Oct	2002	21.9	Night	Observer	Santiago	Santiago	Centre- South	39.9	-0.3674	-90.5841	6	5	0.773333333
1251	Baquerizo	Nov	2002	23.3	Night	Observer	Pinzon	Pinzon	Centre- South	78.4	-0.6084	-90.47927	1	6	1.056666667
1252	Baquerizo	Nov	2002	23.3	Night	Observer	Pinzon	Pinzon	Centre- South	78.4	-0.6084	-90.6882	2	5	2.045
1253	Baquerizo	Nov	2002	23.3	Night	Observer	Pinzon	Pinzon	Centre- South	78.4	-0.6084	-90.6882	1	5	1.18
1254	Baquerizo	Nov	2002	23.3	Night	Observer	Pinzon	Pinzon	Centre- South	78.4	-0.6084	-90.6882	1	5	0.54
1255	Baquerizo	Nov	2002	23.3	Night	Observer	Pinzon	Pinzon	Centre- South	78.4	-0.6084	-90.6882	1	5	0.54
1256	Baquerizo	Nov	2002	23.3	Night	Observer	Pinzon	Pinzon	Centre- South	78.4	-0.6084	-90.6882	1	5	1.54
1257	Baquerizo	Nov	2002	23.3	Night	Observer	Pinzon	Pinzon	Centre- South	78.4	-0.6084	-90.6882	1	6	0.6
1258	Baquerizo	Nov	2002	23.9	Day	Observer	San Cristobal N y O	San Cristobal	Centre- South	12.8	-0.75362	-89.45947	2	5	1.1
1259	Baquerizo	Nov	2002	23.9	Day	Landing	San Cristobal N y O	San Cristobal	Centre- South	12.8	-0.77633	-89.47567	2	5	0.544
1260	Baquerizo	Nov	2002	23.9	Night	Landing	San Cristobal N y O	San Cristobal	Centre- South	20.3	-0.688295	-89.3746	1	5	1.088
1261	Baquerizo	Nov	2002	23.9	Night	Landing	San Cristobal N y O	San Cristobal	Centre- South	22	-0.683	-89.3279	1	6	1.36
1262	Baquerizo	Nov	2002	23.9	Night	Landing	San Cristobal N y O	San Cristobal	Centre- South	12.8	-0.77633	-89.47567	1	7	1.492857143
1263	Baquerizo	Nov	2002	23.9	Night	Landing	San Cristobal S y E	San Cristobal	Centre- South	9.5	-0.9557	-89.5197	1	7	0.216190476
1264	Baquerizo	Nov	2002	23.9	Night	Landing	San Cristobal S y E	San Cristobal	Centre- South	5.41	-0.94788	-89.58696	1	5	1.12
1265	Baquerizo	Nov	2002	23.9	Night	Landing	San Cristobal S y E	San Cristobal	Centre- South	11.2	-0.9497	-89.4963	1	5	1.212
1266	Baquerizo	Nov	2002	23.9	Night	Landing	San Cristobal S y E	San Cristobal	Centre- South	26.2	-0.8626	-89.367	2	4	1.571666667
1267	Baquerizo	Nov	2002	23.9	Night	Landing	San Cristobal S y E	San Cristobal	Centre- South	6.1	-0.9409	-89.5906	2	5	0.909
1268	Baquerizo	Nov	2002	23.9	Day	Landing	San Cristobal S y E	San Cristobal	Centre- South	27.8	-0.842495	-89.352716	2	2	0.330833333
1269	Baquerizo	Nov	2002	23.9	Night	Landing	San Cristobal S y E	San Cristobal	Centre- South	5.41	-0.94788	-89.58696	1	5	2.544
1270	Baquerizo	Nov	2002	23.9	Night	Landing	San Cristobal S y E	San Cristobal	Centre- South	5.41	-0.94788	-89.58696	1	3	2.113333333
1271	Baquerizo	Nov	2002	23.9	Night	Landing	San Cristobal S y E	San Cristobal	Centre- South	5.41	-0.94788	-89.58696	1	6	0.983333333
1272	Baquerizo	Nov	2002	23.9	Night	Landing	San Cristobal S y E	San Cristobal	Centre- South	5.41	-0.94788	-89.58696	2	6	0.454166667
1273	Baquerizo	Nov	2002	23.9	Day	Landing	San Cristobal S y E	San Cristobal	Centre- South	27.8	-0.842495	-89.352716	2	6	0.294166667
1274	Baquerizo	Nov	2002	23.9	Night	Landing	San Cristobal S y E	San Cristobal	Centre- South	5.41	-0.94788	-89.58696	1	6	0.216666667
1275	Baquerizo	Nov	2002	23.9	Night	Landing	San Cristobal S y E	San Cristobal	Centre- South	15.5	-0.93575	-89.43985	2	6	0.5475
1276	Baquerizo	Nov	2002	23.9	Night	Landing	San Cristobal S y E	San Cristobal	Centre- South	15.5	-0.93575	-89.43985	1	6	1.363333333
1277	Baquerizo	Nov	2002	23.9	Night	Landing	San Cristobal S y E	San Cristobal	Centre- South	11.2	-0.9497	-89.4963	1	6	1.363333333
1278	Baquerizo	Nov	2002	23.9	Night	Landing	San Cristobal S y E	San Cristobal	Centre- South	27.8	-0.842495	-89.352716	1	5	1.362
1279	Baquerizo	Nov	2002	23.9	Night	Landing	San Cristobal S y E	San Cristobal	Centre- South	9.5	-0.9557	-89.5197	1	6	0.605
1280	Baquerizo	Nov	2002	23.9	Night	Landing	San Cristobal S y E	San Cristobal	Centre- South	26	-0.71267	-89.2403	2	8	0.61875
1281	Baquerizo	Nov	2002	23.9	Night	Landing	San Cristobal S y E	San Cristobal	Centre- South	5.41	-0.94788	-89.58696	1	6	1.661666667
1282	Baquerizo	Nov	2002	23.9	Day	Landing	San Cristobal S y E	San Cristobal	Centre- South	11.2	-0.9497	-89.4963	2	6	1.08
1283	Baquerizo	Nov	2002	23.9	Night	Landing	San Cristobal S y E	San Cristobal	Centre- South	11.2	-0.9497	-89.4963	1	5	0.9
1284	Baquerizo	Nov	2002	23.9	Night	Landing	San Cristobal S y E	San Cristobal	Centre- South	36.9	-0.7556	-89.2644	1	18	1.590555556
1285	Baquerizo	Nov	2002	23.9	Night	Landing	San Cristobal S y E	San Cristobal	Centre- South	15.5	-0.93575	-89.43985	1	6	1.133333333
1286	Baquerizo	Nov	2002	23.9	Day	Landing	San Cristobal S y E	San Cristobal	Centre- South	26	-0.71267	-89.2403	1	5	1.994
1287	Baquerizo	Nov	2002	23.9	Day	Landing	San Cristobal S y E	San Cristobal	Centre- South	8.25	-0.95585	-89.5428	1	3	3.776666667
1288	Baquerizo	Nov	2002	23.9	Day	Landing	San Cristobal S y E	San Cristobal	Centre- South	36.9	-0.7556	-89.2644	1	6	1.965
1289	Baquerizo	Nov	2002	23.9	Night	Landing	San Cristobal S y E	San Cristobal	Centre- South	11.2	-0.9497	-89.4963	1	6	1.666666667
1290	Baquerizo	Nov	2002	23.9	Night	Landing	San Cristobal S y E	San Cristobal	Centre- South	36.9	-0.7556	-89.2644	1	18	1.388888889
1291	Baquerizo	Nov	2002	23.9	Night	Landing	San Cristobal S y E	San Cristobal	Centre- South	11.2	-0.9497	-89.4963	2	2	0.7925
1292	Baquerizo	Nov	2002	23.9	Night	Landing	San Cristobal S y E	San Cristobal	Centre- South	9.5	-0.9557	-89.5197	1	5	3.272
1293	Baquerizo	Nov	2002	23.9	Night	Landing	San Cristobal S y E	San Cristobal	Centre- South	15.5	-0.93575	-89.43985	1	8	2.04
1294	Baquerizo	Nov	2002	23.9	Night	Landing	San Cristobal S y E	San Cristobal	Centre- South	11.2	-0.9497	-89.4963	1	7	1.428571429
1295	Baquerizo	Nov	2002	23.9	Day	Landing	San Cristobal S y E	San Cristobal	Centre- South	27.8	-0.842495	-89.352716	1	8	2.4125
1296	Baquerizo	Nov	2002	23.9	Day	Landing	San Cristobal S y E	San Cristobal	Centre- South	27.8	-0.842495	-89.352716	2	7	0.68
1297	Baquerizo	Nov	2002	23.9	Day	Landing	San Cristobal S y E	San Cristobal	Centre- South	11.2	-0.9497	-89.4963	2	5	0.36
1298	Baquerizo	Nov	2002	23.9	Night	Landing	San Cristobal S y E	San Cristobal	Centre- South	5.41	-0.94788	-89.58696	1	5	1.5418
1299	Baquerizo	Nov	2002	23.9	Night	Landing	San Cristobal S y E	San Cristobal	Centre- South	6.1	-0.9409	-89.5906	1	6	1.363333333
1300	Baquerizo	Nov	2002	23.9	Night	Landing	San Cristobal S y E	San Cristobal	Centre- South	11.2	-0.9497	-89.4963	2	8	0.906875
1301	Baquerizo	Nov	2002	23.9	Night	Landing	San Cristobal S y E	San Cristobal	Centre- South	5.41	-0.94788	-89.58696	1	7	1.618571429
1302	Baquerizo	Nov	2002	23.9	Night	Landing	San Cristobal S y E	San Cristobal	Centre- South	5.41	-0.94788	-89.58696	2	3	0.378333333
1303	Baquerizo	Nov	2002	23.9	Night	Landing	San Cristobal S y E	San Cristobal	Centre- South	15.5	-0.93575	-89.43985	1	6	1.888333333
1304	Baquerizo	Nov	2002	23.9	Night	Landing	San Cristobal S y E	San Cristobal	Centre- South	5.41	-0.94788	-89.58696	1	6	1.816666667
1305	Baquerizo	Nov	2002	23.9	Night	Landing	San Cristobal S y E	San Cristobal	Centre- South	27.8	-0.842495	-89.352716	1	6	2.726666667
1306	Baquerizo	Nov	2002	23.9	Night	Landing	San Cristobal S y E	San Cristobal	Centre- South	36.9	-0.7556	-89.2644	1	8	2.38
1307	Baquerizo	Nov	2002	23.9	Day	Landing	San Cristobal S y E	San Cristobal	Centre- South	5.41	-0.94788	-89.58696	2	6	0.605833333
1308	Baquerizo	Nov	2002	23.9	Day	Landing	San Cristobal S y E	San Cristobal	Centre- South	11.2	-0.9497	-89.4963	1	6	2.493333333
1309	Baquerizo	Nov	2002	23.9	Night	Landing	San Cristobal S y E	San Cristobal	Centre- South	36.9	-0.7556	-89.2644	1	6	3.93
1310	Ayora	Nov	2002	23.7	Day	Landing	Santa Cruz	Santa Cruz	Centre- South	5.62	-0.7354	-90.2324	1	3	0.466666667
1311	Ayora	Nov	2002	23.7	Day	Landing	Santa Cruz	Santa Cruz	Centre- South	9.51	-0.75504	-90.42136	2	4	0.1625
1312	Ayora	Nov	2002	23.7	Day	Landing	Santa Cruz	Santa Cruz	Centre- South	9.51	-0.75504	-90.42136	1	5	0.46
1313	Ayora	Nov	2002	23.7	Day	Landing	Santa Cruz	Santa Cruz	Centre- South	14	-0.73309	-90.4665	1	6	0.533333333
1314	Ayora	Nov	2002	23.7	Night	Landing	Santa Cruz	Santa Cruz	Centre- South	9.51	-0.75504	-90.42136	1	3	1.433333333
1315	Ayora	Nov	2002	23.7	Night	Landing	Santa Cruz	Santa Cruz	Centre- South	13	-0.74564	-90.44894	1	16	0.65625
1316	Ayora	Nov	2002	23.7	Night	Landing	Santa Cruz	Santa Cruz	Centre- South	11.3	-0.7485	-90.4464	1	6	2.2
1317	Ayora	Nov	2002	23.7	Day	Landing	Santa Cruz	Santa Cruz	Centre- South	11.3	-0.7485	-90.4464	1	4	0.85
1318	Ayora	Nov	2002	23.7	Night	Landing	Santa Cruz	Santa Cruz	Centre- South	11.3	-0.7485	-90.4464	1	20	0.5
1319	Ayora	Nov	2002	23.7	Day	Landing	Santa Cruz	Santa Cruz	Centre- South	11.3	-0.7485	-90.4464	1	6	1.7
1320	Ayora	Nov	2002	23.7	Day	Landing	Santa Cruz	Santa Cruz	Centre- South	9.51	-0.75504	-90.42136	1	4	0.225
1321	Ayora	Nov	2002	23.7	Night	Landing	Santa Cruz	Santa Cruz	Centre- South	21.2	-0.654	-90.5493	2	6	1.441666667
1322	Ayora	Nov	2002	23.7	Day	Landing	Santa Cruz	Santa Cruz	Centre- South	7.42	-0.71	-90.2128	1	5	0.08
1323	Ayora	Nov	2002	23.7	Night	Landing	Santa Cruz	Santa Cruz	Centre- South	21.2	-0.654	-90.5493	1	6	2.083333333
1324	Ayora	Nov	2002	23.7	Day	Landing	Santa Cruz	Santa Cruz	Centre- South	9.51	-0.75504	-90.42136	1	3	2.266666667
1325	Ayora	Nov	2002	23.7	Night	Landing	Santa Cruz	Santa Cruz	Centre- South	14.6	-0.7236	-90.4896	2	6	1.25
1326	Ayora	Nov	2002	23.7	Night	Landing	Santa Cruz	Santa Cruz	Centre- South	21.2	-0.654	-90.5493	1	4	3.175
1327	Ayora	Nov	2002	23.7	Day	Landing	Santa Cruz	Santa Cruz	Centre- South	17.4	-0.7097	-90.5209	1	3	0.466666667
1328	Ayora	Nov	2002	23.7	Day	Landing	Santa Cruz	Santa Cruz	Centre- South	14.6	-0.7236	-90.4896	2	5	0.09
1329	Ayora	Nov	2002	23.7	Day	Landing	Santa Cruz	Santa Cruz	Centre- South	9.51	-0.75504	-90.42136	1	5	0.2
1330	Ayora	Nov	2002	23.7	Day	Landing	Santa Cruz	Santa Cruz	Centre- South	9.51	-0.75504	-90.42136	1	4	0.55
1331	Ayora	Nov	2002	23.7	Day	Landing	Santa Cruz	Santa Cruz	Centre- South	14	-0.73309	-90.4665	1	3	1.2
1332	Ayora	Nov	2002	23.7	Day	Landing	Santa Cruz	Santa Cruz	Centre- South	9.51	-0.75504	-90.42136	2	3	0.45
1333	Ayora	Nov	2002	23.7	Day	Landing	Santa Cruz	Santa Cruz	Centre- South	7.42	-0.71	-90.2128	1	5	0.26
1334	Ayora	Nov	2002	23.7	Day	Landing	Santa Cruz	Santa Cruz	Centre- South	9.51	-0.75504	-90.42136	1	4	1.35
1335	Ayora	Nov	2002	23.7	Day	Landing	Santa Cruz	Santa Cruz	Centre- South	7.42	-0.71	-90.2128	1	6	1.55
1336	Ayora	Nov	2002	23.7	Day	Landing	Santa Cruz	Santa Cruz	Centre- South	14	-0.73309	-90.4665	1	3	0.3
1337	Ayora	Nov	2002	23.7	Day	Landing	Santa Cruz	Santa Cruz	Centre- South	9.51	-0.75504	-90.42136	1	6	0.6
1338	Ayora	Nov	2002	23.7	Day	Landing	Santa Cruz	Santa Cruz	Centre- South	11.3	-0.7485	-90.4464	1	4	1.375
1339	Ayora	Nov	2002	23.7	Day	Landing	Santa Cruz	Santa Cruz	Centre- South	13	-0.74564	-90.44894	1	5	1
1340	Ayora	Nov	2002	23.7	Day	Landing	Santa Cruz	Santa Cruz	Centre- South	9.51	-0.75504	-90.42136	1	5	1.46
1341	Ayora	Nov	2002	23.7	Night	Landing	Santa Cruz	Santa Cruz	Centre- South	14.6	-0.7236	-90.4896	1	3.5	1.428571429
1342	Ayora	Nov	2002	23.7	Night	Landing	Santa Cruz	Santa Cruz	Centre- South	11.3	-0.7485	-90.4464	1	3	2
1343	Ayora	Nov	2002	23.7	Night	Landing	Santa Cruz	Santa Cruz	Centre- South	14	-0.73309	-90.4665	2	16	0.303125
1344	Ayora	Nov	2002	23.7	Night	Landing	Santa Cruz	Santa Cruz	Centre- South	14	-0.73309	-90.4665	1	5	1.22
1345	Ayora	Nov	2002	23.7	Day	Landing	Santa Cruz	Santa Cruz	Centre- South	14	-0.73309	-90.4665	2	5	0.135
1346	Ayora	Nov	2002	23.7	Day	Landing	Santa Cruz	Santa Cruz	Centre- South	9.51	-0.75504	-90.42136	2	4	0.275
1347	Ayora	Nov	2002	23.7	Night	Landing	Santa Cruz	Santa Cruz	Centre- South	11.3	-0.7485	-90.4464	1	4	2.95
1348	Ayora	Nov	2002	23.7	Night	Landing	Santa Cruz	Santa Cruz	Centre- South	11.3	-0.7485	-90.4464	2	7	0.292857143
1349	Ayora	Nov	2002	23.7	Night	Landing	Santa Cruz	Santa Cruz	Centre- South	14.6	-0.7236	-90.4896	1	7	1.685714286
1350	Ayora	Nov	2002	23.7	Day	Landing	Santa Cruz	Santa Cruz	Centre- South	7.42	-0.71	-90.2128	1	7	0.485714286
1351	Ayora	Nov	2002	23.7	Day	Landing	Santa Cruz	Santa Cruz	Centre- South	14	-0.73309	-90.4665	1	5	0.32
1352	Ayora	Nov	2002	23.7	Night	Landing	Santa Cruz	Santa Cruz	Centre- South	11.3	-0.7485	-90.4464	1	4	3.3
1353	Ayora	Nov	2002	23.7	Day	Landing	Santa Cruz	Santa Cruz	Centre- South	13	-0.74564	-90.44894	1	5	0.14
1354	Ayora	Nov	2002	23.7	Night	Landing	Santa Cruz	Santa Cruz	Centre- South	13	-0.74564	-90.44894	1	5	3.2
1355	Ayora	Nov	2002	23.7	Day	Landing	Santa Cruz	Santa Cruz	Centre- South	14.6	-0.7236	-90.4896	1	5	1.1
1356	Ayora	Nov	2002	23.7	Day	Landing	Santa Cruz	Santa Cruz	Centre- South	11.3	-0.7485	-90.4464	1	6	0.666666667
1357	Ayora	Nov	2002	23.7	Day	Landing	Santa Cruz	Santa Cruz	Centre- South	9.51	-0.75504	-90.42136	1	3	0.833333333
1358	Ayora	Nov	2002	23.7	Day	Landing	Santa Cruz	Santa Cruz	Centre- South	13	-0.74564	-90.44894	2	4	0.625
1359	Ayora	Nov	2002	23.7	Night	Landing	Santa Cruz	Santa Cruz	Centre- South	14.6	-0.7236	-90.4896	1	7	0.971428571
1360	Ayora	Nov	2002	23.7	Day	Landing	Santa Cruz	Santa Cruz	Centre- South	7.42	-0.71	-90.2128	1	5	0.44
1361	Ayora	Nov	2002	23.7	Night	Landing	Santa Cruz	Santa Cruz	Centre- South	13	-0.74564	-90.44894	2	4	1.25
1362	Ayora	Nov	2002	23.7	Night	Observer	Santa Cruz	Santa Cruz	Centre- South	14.6	-0.72811	-90.46694	2	7	0.478571429
1363	Ayora	Nov	2002	23.7	Night	Observer	Santa Cruz	Santa Cruz	Centre- South	21.2	-0.69405	-90.53766	2	6	0.316666667
1364	Ayora	Nov	2002	23.7	Night	Observer	Santa Cruz	Santa Cruz	Centre- South	13	-0.75996	-90.42019	2	6.5	0.407692308
1365	Ayora	Nov	2002	23.7	Night	Observer	Santa Cruz	Santa Cruz	Centre- South	13.8	-0.74518	-90.45169	1	6	0.516666667
1366	Ayora	Nov	2002	23.7	Day	Landing	Santa Cruz	Santa Cruz	Centre- South	9.51	-0.75504	-90.42136	1	5	0.28
1367	Ayora	Nov	2002	23.7	Day	Landing	Santa Cruz	Santa Cruz	Centre- South	5.62	-0.7354	-90.2324	2	2	1.025
1368	Ayora	Nov	2002	23.7	Night	Landing	Santa Cruz	Santa Cruz	Centre- South	21.2	-0.654	-90.5493	1	12	2.083333333
1369	Ayora	Nov	2002	23.7	Night	Landing	Santa Cruz	Santa Cruz	Centre- South	21.2	-0.654	-90.5493	1	5	3.6
1370	Ayora	Nov	2002	23.7	Night	Landing	Santa Cruz	Santa Cruz	Centre- South	14	-0.73309	-90.4665	2	3	0.583333333
1371	Ayora	Nov	2002	23.7	Night	Landing	Santa Cruz	Santa Cruz	Centre- South	7.42	-0.71	-90.2128	1	14	1.642857143
1372	Ayora	Nov	2002	23.7	Night	Landing	Santa Cruz	Santa Cruz	Centre- South	14.6	-0.7236	-90.4896	2	8	1.1875
1373	Ayora	Nov	2002	23.7	Night	Landing	Santa Cruz	Santa Cruz	Centre- South	14.6	-0.7236	-90.4896	1	5	2.9
1374	Ayora	Nov	2002	23.7	Night	Landing	Santa Cruz	Santa Cruz	Centre- South	21.2	-0.654	-90.5493	1	8	2.5625
1375	Ayora	Nov	2002	23.7	Night	Landing	Santa Cruz	Santa Cruz	Centre- South	26.5	-0.57354	-90.53749	1	24	1.104166667
1376	Ayora	Nov	2002	23.7	Night	Landing	Santa Cruz	Santa Cruz	Centre- South	13	-0.74564	-90.44894	2	7	1.428571429
1377	Ayora	Nov	2002	23.7	Day	Landing	Santa Cruz	Santa Cruz	Centre- South	11.3	-0.7485	-90.4464	1	5	1
1378	Ayora	Nov	2002	23.7	Night	Landing	Santa Cruz	Santa Cruz	Centre- South	11.3	-0.7485	-90.4464	1	3	0.833333333
1379	Ayora	Nov	2002	23.7	Day	Landing	Santa Cruz	Santa Cruz	Centre- South	14	-0.73309	-90.4665	2	4	0.875
1380	Ayora	Nov	2002	23.7	Night	Landing	Santa Cruz	Santa Cruz	Centre- South	14.6	-0.7236	-90.4896	1	20	1.525
1381	Ayora	Nov	2002	23.7	Night	Landing	Santa Cruz	Santa Cruz	Centre- South	11.3	-0.7485	-90.4464	1	6	0.916666667
1382	Ayora	Nov	2002	23.7	Day	Landing	Santa Cruz	Santa Cruz	Centre- South	14	-0.73309	-90.4665	1	3	0.073333333
1383	Ayora	Nov	2002	23.7	Night	Landing	Santa Cruz	Santa Cruz	Centre- South	21.2	-0.654	-90.5493	2	24	0.64375
1384	Ayora	Nov	2002	23.7	Night	Landing	Santa Cruz	Santa Cruz	Centre- South	11.3	-0.7485	-90.4464	2	5	0.7
1385	Ayora	Nov	2002	23.7	Day	Observer	Santa Cruz	Santa Cruz	Centre- South	26.4	-0.48055	-90.25031	2	2	0.375
1386	Ayora	Nov	2002	23.7	Night	Observer	Santa Cruz	Santa Cruz	Centre- South	26.4	-0.47931	-90.25196	2	3	0.5
1387	Ayora	Nov	2002	23.7	Night	Landing	Santa Cruz	Santa Cruz	Centre- South	26.5	-0.57354	-90.53749	1	12	1.491666667
1388	Ayora	Nov	2002	23.7	Night	Landing	Santa Cruz	Santa Cruz	Centre- South	21.2	-0.654	-90.5493	1	4	5.625
1389	Ayora	Nov	2002	23.7	Day	Landing	Santa Cruz	Santa Cruz	Centre- South	11.3	-0.7485	-90.4464	1	3	0.3
1390	Ayora	Nov	2002	23.7	Day	Landing	Santa Cruz	Santa Cruz	Centre- South	9.51	-0.75504	-90.42136	1	4	0.775
1391	Ayora	Nov	2002	23.7	Day	Landing	Santa Cruz	Santa Cruz	Centre- South	7.42	-0.71	-90.2128	1	4	0.45
1392	Ayora	Nov	2002	23.7	Night	Landing	Santa Cruz	Santa Cruz	Centre- South	14.6	-0.7236	-90.4896	1	4	1.75
1393	Ayora	Nov	2002	23.7	Night	Landing	Santa Cruz	Santa Cruz	Centre- South	11.3	-0.7485	-90.4464	2	12	0.625
1394	Ayora	Nov	2002	23.7	Day	Landing	Santa Cruz	Santa Cruz	Centre- South	7.42	-0.71	-90.2128	1	4	1.625
1395	Ayora	Nov	2002	23.7	Night	Landing	Santa Cruz	Santa Cruz	Centre- South	11.3	-0.7485	-90.4464	1	6	0.916666667
1396	Ayora	Nov	2002	23.7	Night	Landing	Santa Cruz	Santa Cruz	Centre- South	11.3	-0.7485	-90.4464	1	20	1.005
1397	Ayora	Nov	2002	23.7	Day	Landing	Santa Cruz	Santa Cruz	Centre- South	11.3	-0.7485	-90.4464	1	6	1.666666667
1398	Ayora	Nov	2002	23.7	Night	Observer	Santa Cruz	Santa Cruz	Centre- South	9.51	-0.77095	-90.38039	2	6	0.716666667
1399	Ayora	Nov	2002	23.7	Night	Observer	Santa Cruz	Santa Cruz	Centre- South	11.3	-0.77213	-90.40385	1	2.5	3.08
1400	Ayora	Nov	2002	23.7	Night	Observer	Santa Cruz	Santa Cruz	Centre- South	13	-0.74672	-90.44568	2	5	1.24
1401	Ayora	Nov	2002	23.7	Night	Observer	Santa Cruz	Santa Cruz	Centre- South	13	-0.75404	-90.43543	2	5.5	1.981818182
1402	Ayora	Nov	2002	23.7	Day	Observer	Santa Cruz	Santa Cruz	Centre- South	13.8	-0.72936	-90.46486	2	4	1.4125
1403	Ayora	Nov	2002	23.7	Night	Observer	Santa Cruz	Santa Cruz	Centre- South	13	-0.75733	-90.42595	2	4	0.25
1404	Ayora	Nov	2002	23.7	Night	Observer	Santa Cruz	Santa Cruz	Centre- South	11.3	-0.76562	-90.41394	2	2	0.3
1405	Ayora	Nov	2002	23.7	Night	Landing	Santa Cruz	Santa Cruz	Centre- South	26.5	-0.57354	-90.53749	1	8	1.425
1406	Ayora	Nov	2002	23.7	Night	Landing	Santa Cruz	Santa Cruz	Centre- South	21.2	-0.654	-90.5493	4	35	0.55
1407	Ayora	Nov	2002	23.7	Night	Landing	Santa Cruz	Santa Cruz	Centre- South	26.5	-0.57354	-90.53749	4	7	0.164285714
1408	Ayora	Nov	2002	23.7	Night	Landing	Santa Cruz	Santa Cruz	Centre- South	26.5	-0.57354	-90.53749	4	13	0.219230769
1409	Ayora	Nov	2002	23.7	Day	Observer	Santa Cruz	Santa Cruz	Centre- South	26.4	-0.47931	-90.25196	6	5	0.15
1410	Baquerizo	Nov	2002	23.7	Night	Observer	Santa Cruz	Santa Cruz	Centre- South	70	-0.6775	-90.53968	2	6	0.841666667
1411	Baquerizo	Nov	2002	23.7	Night	Observer	Santa Cruz	Santa Cruz	Centre- South	70	-0.654	-90.5493	2	6	0.416666667
1412	Baquerizo	Nov	2002	23.7	Night	Observer	Santa Cruz	Santa Cruz	Centre- South	70	-0.654	-90.5493	2	6	0.716666667
1413	Baquerizo	Nov	2002	23.7	Night	Observer	Santa Cruz	Santa Cruz	Centre- South	63.2	-0.7236	-90.4896	1	8	1.25
1414	Baquerizo	Nov	2002	23.7	Night	Observer	Santa Cruz	Santa Cruz	Centre- South	63.2	-0.7236	-90.4896	1	6	1.666666667
1415	Baquerizo	Nov	2002	23.7	Night	Observer	Santa Cruz	Santa Cruz	Centre- South	70	-0.654	-90.5493	1	5	1.36
1416	Baquerizo	Nov	2002	23.7	Night	Observer	Santa Cruz	Santa Cruz	Centre- South	70	-0.654	-90.5493	1	5	0.9
1417	Baquerizo	Nov	2002	23.7	Night	Observer	Santa Cruz	Santa Cruz	Centre- South	63.2	-0.7236	-90.4896	2	5	0.9
1418	Baquerizo	Nov	2002	23.7	Night	Observer	Santa Cruz	Santa Cruz	Centre- South	70	-0.654	-90.5493	2	6	1.666666667
1419	Baquerizo	Nov	2002	23.7	Night	Observer	Santa Cruz	Santa Cruz	Centre- South	63.2	-0.7236	-90.4896	2	5	1.04
1420	Baquerizo	Nov	2002	23.7	Night	Observer	Santa Cruz	Santa Cruz	Centre- South	70	-0.654	-90.5493	2	5	1.54
1421	Baquerizo	Nov	2002	23.7	Night	Observer	Santa Cruz	Santa Cruz	Centre- South	70	-0.654	-90.5493	1	5	0.818
1422	Baquerizo	Nov	2002	23.7	Night	Observer	Santa Cruz	Santa Cruz	Centre- South	63.2	-0.7236	-90.4896	1	4	2.9475
1423	Baquerizo	Nov	2002	23.7	Night	Observer	Santa Cruz	Santa Cruz	Centre- South	63.2	-0.6775	-90.53968	1	5	3.178
1424	Baquerizo	Nov	2002	23.5	Night	Landing	Santa Fe	Santa Fe	Centre- South	30.2	-0.8404	-90.0434	2	8	1.76125
1425	Baquerizo	Nov	2002	23.5	Night	Observer	Santa Fe	Santa Fe	Centre- South	30.2	-0.80434	-90.03874	1	3	1.377777778
1426	Ayora	Nov	2002	24	Night	Landing	Santiago	Santiago	Centre- South	39.9	-0.3674	-90.5841	2	4	2.1875
1427	Ayora	Nov	2002	24	Night	Observer	Santiago	Santiago	Centre- South	39.9	-0.34912	-90.5645	1	2	0.25
1428	Ayora	Nov	2002	24	Night	Observer	Santiago	Santiago	Centre- South	39.9	-0.34724	-90.56661	2	4	0.3125
1429	Ayora	Nov	2002	24	Night	Landing	Santiago	Santiago	Centre- South	39.9	-0.3674	-90.5841	1	24	2.458333333
1430	Ayora	Nov	2002	24	Night	Landing	Santiago	Santiago	Centre- South	39.9	-0.3674	-90.5841	4	14	0.164285714
1431	Ayora	Nov	2002	24	Night	Observer	Santiago	Santiago	Centre- South	39.9	-0.3674	-90.5841	6	4	0.5
1432	Ayora	Nov	2002	24	Day	Landing	Santiago	Santiago	Centre- South	45.8	-0.1917	-90.6472	6	5	0.333333333
1433	Ayora	Nov	2002	24	Day	Landing	Santiago	Santiago	Centre- South	49.9	-0.23399	-90.58126	6	6	0.5
1434	Ayora	Nov	2002	24	Day	Landing	Santiago	Santiago	Centre- South	39.9	-0.3674	-90.5841	6	7	0.404761905
1435	Baquerizo	Nov	2002	24	Night	Observer	Santiago	Santiago	Centre- South	103	-0.1647	-90.8354	2	7	0.614285714
1436	Baquerizo	Nov	2002	24	Night	Observer	Santiago	Santiago	Centre- South	106	-0.28955	-90.92695	2	7	0.485714286
1437	Baquerizo	Nov	2002	24	Night	Observer	Santiago	Santiago	Centre- South	88.7	-0.3518	-90.6716	1	6	2.266666667
1438	Baquerizo	Nov	2002	24	Night	Observer	Santiago	Santiago	Centre- South	103	-0.1647	-90.8354	2	5	0.59
1439	Baquerizo	Nov	2002	24	Night	Observer	Santiago	Santiago	Centre- South	88.7	-0.3518	-90.6716	1	6	1.893333333
1440	Baquerizo	Nov	2002	24	Night	Observer	Santiago	Santiago	Centre- South	106	-0.30392	-90.83426	1	4	4.435
1441	Baquerizo	Nov	2002	24	Night	Observer	Santiago	Santiago	Centre- South	106	-0.28955	-90.92695	1	6	0.15
1442	Baquerizo	Dec	2002	24.4	Night	Landing	San Cristobal N y O	San Cristobal	Centre- South	12.8	-0.77633	-89.47567	1	6	3.778333333
1443	Baquerizo	Dec	2002	24.4	Night	Landing	San Cristobal N y O	San Cristobal	Centre- South	23.6	-1.1528	-89.8323	2	10	0.2725
1444	Baquerizo	Dec	2002	24.4	Night	Observer	San Cristobal N y O	San Cristobal	Centre- South	5.5	-0.83806	-89.56337	1	3	0.6
1445	Baquerizo	Dec	2002	24.4	Night	Landing	San Cristobal N y O	San Cristobal	Centre- South	26	-0.7	-89.2759	2	7	0.441428571
1446	Baquerizo	Dec	2002	24.5	Night	Landing	San Cristobal S y E	San Cristobal	Centre- South	11.2	-0.9497	-89.4963	1	4	1.1325
1447	Baquerizo	Dec	2002	24.5	Night	Landing	San Cristobal S y E	San Cristobal	Centre- South	6.1	-0.9409	-89.5906	1	4	1.8125
1448	Baquerizo	Dec	2002	24.5	Night	Observer	San Cristobal S y E	San Cristobal	Centre- South	26.2	-0.85437	-89.36896	1	4	0.795
1449	Baquerizo	Dec	2002	24.5	Night	Observer	San Cristobal S y E	San Cristobal	Centre- South	27.8	-0.7863	-89.29716	2	3	0.53
1450	Baquerizo	Dec	2002	24.5	Day	Landing	San Cristobal S y E	San Cristobal	Centre- South	26.2	-0.8626	-89.367	1	5	1.18
1451	Baquerizo	Dec	2002	24.5	Day	Landing	San Cristobal S y E	San Cristobal	Centre- South	26.2	-0.8626	-89.367	1	5	0.272
1452	Baquerizo	Dec	2002	24.5	Night	Observer	San Cristobal S y E	San Cristobal	Centre- South	26.2	-0.87545	-89.37505	1	5	0.908
1453	Baquerizo	Dec	2002	24.5	Night	Observer	San Cristobal S y E	San Cristobal	Centre- South	26.2	-0.83621	-89.34309	2	4	0.45375
1454	Baquerizo	Dec	2002	24.5	Night	Landing	San Cristobal S y E	San Cristobal	Centre- South	9.5	-0.9557	-89.5197	1	5	2.272
1455	Baquerizo	Dec	2002	24.5	Night	Landing	San Cristobal S y E	San Cristobal	Centre- South	6.1	-0.9409	-89.5906	2	6	0.605833333
1456	Baquerizo	Dec	2002	24.5	Night	Observer	San Cristobal S y E	San Cristobal	Centre- South	17.4	-0.9254	-89.4113	2	6	0.454166667
1457	Baquerizo	Dec	2002	24.5	Day	Landing	San Cristobal S y E	San Cristobal	Centre- South	27.8	-0.842495	-89.352716	1	6	0.833333333
1458	Baquerizo	Dec	2002	24.5	Day	Landing	San Cristobal S y E	San Cristobal	Centre- South	17.4	-0.9254	-89.4113	1	6	0.075
1459	Baquerizo	Dec	2002	24.5	Day	Landing	San Cristobal S y E	San Cristobal	Centre- South	27.8	-0.842495	-89.352716	2	10	0.34
1460	Baquerizo	Dec	2002	24.5	Night	Landing	San Cristobal S y E	San Cristobal	Centre- South	5.41	-0.94788	-89.58696	1	8	1.21875
1461	Baquerizo	Dec	2002	24.5	Day	Landing	San Cristobal S y E	San Cristobal	Centre- South	27.8	-0.842495	-89.352716	2	6	0.416666667
1462	Baquerizo	Dec	2002	24.5	Night	Landing	San Cristobal S y E	San Cristobal	Centre- South	5.41	-0.94788	-89.58696	1	6	0.603333333
1463	Baquerizo	Dec	2002	24.5	Night	Landing	San Cristobal S y E	San Cristobal	Centre- South	11.2	-0.9497	-89.4963	2	6	1.875
1464	Baquerizo	Dec	2002	24.5	Night	Landing	San Cristobal S y E	San Cristobal	Centre- South	15.5	-0.93575	-89.43985	2	6	2.2725
1465	Baquerizo	Dec	2002	24.5	Night	Landing	San Cristobal S y E	San Cristobal	Centre- South	11.2	-0.9497	-89.4963	2	8	1.02
1466	Baquerizo	Dec	2002	24.5	Day	Observer	San Cristobal S y E	San Cristobal	Centre- South	26.2	-0.8626	-89.367	1	6	0.965
1467	Baquerizo	Dec	2002	24.5	Day	Landing	San Cristobal S y E	San Cristobal	Centre- South	36.9	-0.7556	-89.2644	2	6	0.453333333
1468	Baquerizo	Dec	2002	24.5	Day	Landing	San Cristobal S y E	San Cristobal	Centre- South	5.41	-0.94788	-89.58696	1	7	1.851428571
1469	Baquerizo	Dec	2002	24.5	Night	Landing	San Cristobal S y E	San Cristobal	Centre- South	36.9	-0.7556	-89.2644	1	8	1.41625
1470	Baquerizo	Dec	2002	24.5	Night	Landing	San Cristobal S y E	San Cristobal	Centre- South	11.2	-0.9497	-89.4963	1	6	1.055
1471	Baquerizo	Dec	2002	24.5	Night	Landing	San Cristobal S y E	San Cristobal	Centre- South	11.2	-0.9497	-89.4963	2	6	0.906666667
1472	Baquerizo	Dec	2002	24.5	Night	Landing	San Cristobal S y E	San Cristobal	Centre- South	11.2	-0.9497	-89.4963	2	6	0.188333333
1473	Baquerizo	Dec	2002	24.5	Night	Landing	San Cristobal S y E	San Cristobal	Centre- South	11.2	-0.9497	-89.4963	2	5	1.36
1474	Baquerizo	Dec	2002	24.5	Night	Landing	San Cristobal S y E	San Cristobal	Centre- South	5.41	-0.94788	-89.58696	2	15	0.423
1475	Baquerizo	Dec	2002	24.5	Day	Landing	San Cristobal S y E	San Cristobal	Centre- South	11.2	-0.9497	-89.4963	1	6	0.453333333
1476	Baquerizo	Dec	2002	24.5	Night	Landing	San Cristobal S y E	San Cristobal	Centre- South	5.41	-0.94788	-89.58696	1	8	1.8125
1477	Baquerizo	Dec	2002	24.5	Night	Landing	San Cristobal S y E	San Cristobal	Centre- South	5.41	-0.94788	-89.58696	2	8	0.793125
1478	Baquerizo	Dec	2002	24.5	Night	Landing	San Cristobal S y E	San Cristobal	Centre- South	6.1	-0.9409	-89.5906	2	8	0.99375
1479	Baquerizo	Dec	2002	24.5	Night	Landing	San Cristobal S y E	San Cristobal	Centre- South	5.41	-0.94788	-89.58696	2	6	0.5675
1480	Baquerizo	Dec	2002	24.5	Day	Landing	San Cristobal S y E	San Cristobal	Centre- South	11.2	-0.9497	-89.4963	1	7	1.258571429
1481	Baquerizo	Dec	2002	24.5	Night	Observer	San Cristobal S y E	San Cristobal	Centre- South	27.8	-0.83141	-89.3504	1	3	0.453333333
1482	Baquerizo	Dec	2002	24.5	Day	Landing	San Cristobal S y E	San Cristobal	Centre- South	26	-0.71267	-89.2403	1	5	0.454
1483	Baquerizo	Dec	2002	24.5	Night	Landing	San Cristobal S y E	San Cristobal	Centre- South	5.41	-0.94788	-89.58696	2	6	0.5675
1484	Baquerizo	Dec	2002	24.5	Night	Landing	San Cristobal S y E	San Cristobal	Centre- South	27.8	-0.842495	-89.352716	2	6	1.439166667
1485	Baquerizo	Dec	2002	24.5	Day	Landing	San Cristobal S y E	San Cristobal	Centre- South	6.1	-0.9409	-89.5906	2	6	0.586666667
1486	Baquerizo	Dec	2002	24.5	Day	Landing	San Cristobal S y E	San Cristobal	Centre- South	11.2	-0.9497	-89.4963	1	8	1.25
1487	Baquerizo	Dec	2002	24.5	Night	Landing	San Cristobal S y E	San Cristobal	Centre- South	36.9	-0.7556	-89.2644	1	6	1.893333333
1488	Baquerizo	Dec	2002	24.5	Night	Landing	San Cristobal S y E	San Cristobal	Centre- South	11.2	-0.9497	-89.4963	1	8	1.42
1489	Baquerizo	Dec	2002	24.5	Night	Observer	San Cristobal S y E	San Cristobal	Centre- South	27.8	-0.84804	-89.36371	1	2	0.45
1490	Baquerizo	Dec	2002	24.5	Night	Landing	San Cristobal S y E	San Cristobal	Centre- South	11.2	-0.9497	-89.4963	2	5	0.5
1491	Baquerizo	Dec	2002	24.5	Day	Landing	San Cristobal S y E	San Cristobal	Centre- South	27.8	-0.842495	-89.352716	1	6	2.045
1492	Baquerizo	Dec	2002	24.5	Day	Landing	San Cristobal S y E	San Cristobal	Centre- South	27.8	-0.842495	-89.352716	2	8	0.970625
1493	Baquerizo	Dec	2002	24.5	Day	Landing	San Cristobal S y E	San Cristobal	Centre- South	11.2	-0.9497	-89.4963	2	6	0.354166667
1494	Baquerizo	Dec	2002	24.5	Day	Landing	San Cristobal S y E	San Cristobal	Centre- South	11.2	-0.9497	-89.4963	1	6	1.25
1495	Baquerizo	Dec	2002	24.5	Day	Landing	San Cristobal S y E	San Cristobal	Centre- South	11.2	-0.9497	-89.4963	2	6	0.416666667
1496	Baquerizo	Dec	2002	24.5	Night	Landing	San Cristobal S y E	San Cristobal	Centre- South	11.2	-0.9497	-89.4963	1	4	0.75
1497	Baquerizo	Dec	2002	24.5	Night	Landing	San Cristobal S y E	San Cristobal	Centre- South	27.8	-0.842495	-89.352716	2	20	0.9545
1498	Ayora	Dec	2002	24.4	Night	Observer	Santa Cruz	Santa Cruz	Centre- South	1.13	-0.77056	-90.31886	1	4	1.25
1499	Ayora	Dec	2002	24.4	Night	Landing	Santa Cruz	Santa Cruz	Centre- South	14.6	-0.7236	-90.4896	2	12	0.304166667
1500	Ayora	Dec	2002	24.4	Day	Landing	Santa Cruz	Santa Cruz	Centre- South	7.42	-0.71	-90.2128	2	7	0.064285714
1501	Ayora	Dec	2002	24.4	Night	Landing	Santa Cruz	Santa Cruz	Centre- South	14.6	-0.7236	-90.4896	1	18	0.755555556
1502	Ayora	Dec	2002	24.4	Night	Landing	Santa Cruz	Santa Cruz	Centre- South	21.2	-0.654	-90.5493	1	6	0.45
1503	Ayora	Dec	2002	24.4	Night	Landing	Santa Cruz	Santa Cruz	Centre- South	26.5	-0.57354	-90.53749	2	15	0.683333333
1504	Ayora	Dec	2002	24.4	Day	Landing	Santa Cruz	Santa Cruz	Centre- South	11.3	-0.7485	-90.4464	2	4	0.8125
1505	Ayora	Dec	2002	24.4	Day	Landing	Santa Cruz	Santa Cruz	Centre- South	9.51	-0.75504	-90.42136	2	5	0.34
1506	Ayora	Dec	2002	24.4	Day	Landing	Santa Cruz	Santa Cruz	Centre- South	9.51	-0.75504	-90.42136	2	4	0.1125
1507	Ayora	Dec	2002	24.4	Day	Landing	Santa Cruz	Santa Cruz	Centre- South	9.51	-0.75504	-90.42136	2	5	0.36
1508	Ayora	Dec	2002	24.4	Day	Landing	Santa Cruz	Santa Cruz	Centre- South	14	-0.73309	-90.4665	2	5	0.05
1509	Ayora	Dec	2002	24.4	Night	Landing	Santa Cruz	Santa Cruz	Centre- South	11.3	-0.7485	-90.4464	1	12	0.833333333
1510	Ayora	Dec	2002	24.4	Night	Landing	Santa Cruz	Santa Cruz	Centre- South	9.51	-0.75504	-90.42136	1	2	1.5
1511	Ayora	Dec	2002	24.4	Night	Landing	Santa Cruz	Santa Cruz	Centre- South	9.51	-0.75504	-90.42136	1	3	1.5
1512	Ayora	Dec	2002	24.4	Day	Landing	Santa Cruz	Santa Cruz	Centre- South	11.3	-0.7485	-90.4464	1	6	0.383333333
1513	Ayora	Dec	2002	24.4	Day	Landing	Santa Cruz	Santa Cruz	Centre- South	11.3	-0.7485	-90.4464	1	6	0.083333333
1514	Ayora	Dec	2002	24.4	Day	Landing	Santa Cruz	Santa Cruz	Centre- South	7.42	-0.71	-90.2128	1	6	0.233333333
1515	Ayora	Dec	2002	24.4	Day	Landing	Santa Cruz	Santa Cruz	Centre- South	11.3	-0.7485	-90.4464	1	6	0.266666667
1516	Ayora	Dec	2002	24.4	Day	Landing	Santa Cruz	Santa Cruz	Centre- South	9.51	-0.75504	-90.42136	1	5	0.28
1517	Ayora	Dec	2002	24.4	Day	Landing	Santa Cruz	Santa Cruz	Centre- South	9.51	-0.75504	-90.42136	1	5	0.22
1518	Ayora	Dec	2002	24.4	Day	Landing	Santa Cruz	Santa Cruz	Centre- South	7.42	-0.71	-90.2128	1	4	0.05
1519	Ayora	Dec	2002	24.4	Day	Landing	Santa Cruz	Santa Cruz	Centre- South	9.51	-0.75504	-90.42136	1	5	0.14
1520	Ayora	Dec	2002	24.4	Day	Landing	Santa Cruz	Santa Cruz	Centre- South	7.42	-0.71	-90.2128	1	4	0.45
1521	Ayora	Dec	2002	24.4	Day	Landing	Santa Cruz	Santa Cruz	Centre- South	7.42	-0.71	-90.2128	1	4	0.6825
1522	Ayora	Dec	2002	24.4	Night	Landing	Santa Cruz	Santa Cruz	Centre- South	14	-0.73309	-90.4665	1	16	0.7375
1523	Ayora	Dec	2002	24.4	Day	Landing	Santa Cruz	Santa Cruz	Centre- South	7.42	-0.71	-90.2128	1	4.5	0.908888889
1524	Ayora	Dec	2002	24.4	Night	Landing	Santa Cruz	Santa Cruz	Centre- South	21.2	-0.654	-90.5493	1	10	4.045
1525	Ayora	Dec	2002	24.4	Night	Landing	Santa Cruz	Santa Cruz	Centre- South	21.2	-0.654	-90.5493	2	11	1.797727273
1526	Ayora	Dec	2002	24.4	Day	Landing	Santa Cruz	Santa Cruz	Centre- South	14	-0.73309	-90.4665	1	4	1.0225
1527	Ayora	Dec	2002	24.4	Day	Landing	Santa Cruz	Santa Cruz	Centre- South	14	-0.73309	-90.4665	1	5	0.728
1528	Ayora	Dec	2002	24.4	Night	Landing	Santa Cruz	Santa Cruz	Centre- South	11.3	-0.7485	-90.4464	1	12	2.235
1529	Ayora	Dec	2002	24.4	Night	Landing	Santa Cruz	Santa Cruz	Centre- South	11.3	-0.7485	-90.4464	1	25	0.76
1530	Ayora	Dec	2002	24.4	Night	Landing	Santa Cruz	Santa Cruz	Centre- South	11.3	-0.7485	-90.4464	2	14	0.542857143
1531	Ayora	Dec	2002	24.4	Day	Landing	Santa Cruz	Santa Cruz	Centre- South	7.42	-0.71	-90.2128	1	5	0.3
1532	Ayora	Dec	2002	24.4	Night	Landing	Santa Cruz	Santa Cruz	Centre- South	7.42	-0.71	-90.2128	1	5	0.2
1533	Ayora	Dec	2002	24.4	Day	Landing	Santa Cruz	Santa Cruz	Centre- South	7.42	-0.71	-90.2128	1	4.5	0.504444444
1534	Ayora	Dec	2002	24.4	Day	Landing	Santa Cruz	Santa Cruz	Centre- South	14	-0.73309	-90.4665	2	33	0.557878788
1535	Ayora	Dec	2002	24.4	Night	Landing	Santa Cruz	Santa Cruz	Centre- South	24.6	-0.4984	-90.2414	1	8	1.1375
1536	Ayora	Dec	2002	24.4	Day	Landing	Santa Cruz	Santa Cruz	Centre- South	11.3	-0.7485	-90.4464	1	6	0.583333333
1537	Ayora	Dec	2002	24.4	Day	Landing	Santa Cruz	Santa Cruz	Centre- South	11.3	-0.7485	-90.4464	2	5	0.45
1538	Ayora	Dec	2002	24.4	Night	Landing	Santa Cruz	Santa Cruz	Centre- South	21.2	-0.654	-90.5493	2	25	0.62
1539	Ayora	Dec	2002	24.4	Day	Landing	Santa Cruz	Santa Cruz	Centre- South	21.2	-0.654	-90.5493	1	60	0.726666667
1540	Ayora	Dec	2002	24.4	Night	Landing	Santa Cruz	Santa Cruz	Centre- South	11.3	-0.7485	-90.4464	2	3	1.216666667
1541	Ayora	Dec	2002	24.4	Day	Landing	Santa Cruz	Santa Cruz	Centre- South	7.42	-0.71	-90.2128	2	5	0.23
1542	Ayora	Dec	2002	24.4	Day	Landing	Santa Cruz	Santa Cruz	Centre- South	14.6	-0.7236	-90.4896	1	5	0.28
1543	Ayora	Dec	2002	24.4	Night	Landing	Santa Cruz	Santa Cruz	Centre- South	14	-0.73309	-90.4665	2	4	0.65375
1544	Ayora	Dec	2002	24.4	Day	Landing	Santa Cruz	Santa Cruz	Centre- South	33.6	-0.514	-90.4798	1	48	1.202083333
1545	Ayora	Dec	2002	24.4	Day	Landing	Santa Cruz	Santa Cruz	Centre- South	9.51	-0.75504	-90.42136	1	6	0.083333333
1546	Ayora	Dec	2002	24.4	Day	Landing	Santa Cruz	Santa Cruz	Centre- South	7.42	-0.71	-90.2128	1	6	0.083333333
1547	Ayora	Dec	2002	24.4	Day	Landing	Santa Cruz	Santa Cruz	Centre- South	14.6	-0.7236	-90.4896	1	8	0.0625
1548	Ayora	Dec	2002	24.4	Day	Landing	Santa Cruz	Santa Cruz	Centre- South	11.3	-0.7485	-90.4464	2	12	0.229166667
1549	Baquerizo	Sep	2003	20.2	Night	Landing	Espa�ola	Espa�ola	Centre- South	36.6	-1.3477	-89.6749	1	6	0.756666667
1550	Baquerizo	Sep	2003	20.2	Day	Landing	Espa�ola	Espa�ola	Centre- South	36.6	-1.3477	-89.6749	1	2	0.905
1551	Baquerizo	Sep	2003	20.2	Night	Landing	Espa�ola	Espa�ola	Centre- South	35.4	-1.36813	-89.7406	4	12	1.306666667
1552	Baquerizo	Sep	2003	20.2	Night	Landing	Espa�ola	Espa�ola	Centre- South	35.4	-1.36813	-89.7406	2	24	4.497916667
1553	Baquerizo	Sep	2003	20.2	Night	Observer	Espa�ola	Espa�ola	Centre- South	35.4	-1.36813	-89.7406	10	21	0.230952381
1554	Villamil	Sep	2003	20.9	Day	Observer	Floreana	Floreana	Centre- South	49.2	-1.24961	-90.37582	1	2	1.35
1555	Villamil	Sep	2003	20.9	Day	Observer	Floreana	Floreana	Centre- South	49.2	-1.24934	-90.37622	1	2	1.15
1556	Villamil	Sep	2003	20.9	Day	Observer	Floreana	Floreana	Centre- South	49.2	-1.24884	-90.37198	1	2	1.8
1557	Baquerizo	Sep	2003	20.9	Night	Observer	Floreana	Floreana	Centre- South	69.4	-1.29001	-90.4992	2	5	0.81
1558	Baquerizo	Sep	2003	20.9	Night	Observer	Floreana	Floreana	Centre- South	60.4	-1.3141	-90.3769	2	5	0.5
1559	Baquerizo	Sep	2003	20.9	Night	Observer	Floreana	Floreana	Centre- South	69.4	-1.35852	-90.35852	1	8	1.8125
1560	Baquerizo	Sep	2003	20.9	Night	Observer	Floreana	Floreana	Centre- South	69.4	-1.35888	-90.46022	2	6	1.016666667
1561	Baquerizo	Sep	2003	20.9	Night	Observer	Floreana	Floreana	Centre- South	69.4	-1.29001	-90.4992	2	5	0.68
1562	Baquerizo	Sep	2003	20.9	Night	Observer	Floreana	Floreana	Centre- South	69.4	-1.29001	-90.4992	1	5	1.18
1563	Baquerizo	Sep	2003	20.9	Night	Observer	Floreana	Floreana	Centre- South	60.4	-1.3141	-90.3769	2	5	1.863
1564	Baquerizo	Sep	2003	20.9	Night	Observer	Floreana	Floreana	Centre- South	69.4	-1.29001	-90.4992	10	24	0.239166667
1565	Baquerizo	Sep	2003	20.9	Night	Observer	Floreana	Floreana	Centre- South	60.4	-1.3141	-90.3769	10	10	0.05
1566	Ayora	Sep	2003	21.7	Night	Landing	Genovesa	Genovesa	North	71.1	0.3123	-89.9583	1	24	3.4375
1567	Ayora	Sep	2003	21.7	Day	Landing	Isabela Norte y Este	Isabela	West	90.6	0.1711	-91.3558	2	25	0.8
1568	Ayora	Sep	2003	21.7	Day	Landing	Isabela Norte y Este	Isabela	West	90.6	0.1711	-91.3558	2	25	0.8
1569	Ayora	Sep	2003	21.7	Day	Observer	Isabela Norte y Este	Isabela	West	104	0.06442	-91.50484	1	6	1.833333333
1570	Ayora	Sep	2003	21.7	Day	Observer	Isabela Norte y Este	Isabela	West	50.3	-0.41559	-90.97243	2	4	0.25
1571	Ayora	Sep	2003	21.7	Day	Observer	Isabela Norte y Este	Isabela	West	50.3	-0.41345	-90.97452	2	5	0.7
1572	Ayora	Sep	2003	21.7	Day	Observer	Isabela Norte y Este	Isabela	West	50.3	-0.41559	-90.97243	1	4	0.25
1573	Ayora	Sep	2003	21.7	Day	Observer	Isabela Norte y Este	Isabela	West	90.6	0.16849	-91.33713	2	4	0.875
1574	Ayora	Sep	2003	21.7	Day	Observer	Isabela Norte y Este	Isabela	West	90.6	0.17005	-91.34121	2	9	1.027777778
1575	Ayora	Sep	2003	21.7	Day	Observer	Isabela Norte y Este	Isabela	West	90.6	0.17005	-91.34121	1	9	1.444444444
1576	Ayora	Sep	2003	21.7	Day	Observer	Isabela Norte y Este	Isabela	West	90.6	0.17005	-91.34121	1	4	3.25
1577	Ayora	Sep	2003	21.7	Night	Observer	Isabela Norte y Este	Isabela	West	90.6	0.1711	-91.3558	2	5	1
1578	Ayora	Sep	2003	21.7	Night	Observer	Isabela Norte y Este	Isabela	West	104	0.06442	-91.50484	2	5	1
1579	Ayora	Sep	2003	21.7	Day	Observer	Isabela Norte y Este	Isabela	West	104	0.10562	-91.48187	1	5	1
1580	Ayora	Sep	2003	21.7	Day	Landing	Isabela Norte y Este	Isabela	West	61.2	-0.3039	-91.0875	1	12	5.116666667
1581	Ayora	Sep	2003	21.7	Day	Observer	Isabela Norte y Este	Isabela	West	42.2	-0.63742	-90.87477	9	4	0.416666667
1582	Ayora	Sep	2003	21.7	Day	Observer	Isabela Norte y Este	Isabela	West	90.6	0.17005	-91.34121	9	5	1.377777778
1583	Ayora	Sep	2003	21.7	Day	Observer	Isabela Norte y Este	Isabela	West	104	0.10562	-91.48187	9	5	1.088888889
1584	Ayora	Sep	2003	21.7	Day	Observer	Isabela Norte y Este	Isabela	West	104	0.10562	-91.48187	2	5	0.9
1585	Ayora	Sep	2003	21.7	Day	Observer	Isabela Norte y Este	Isabela	West	104	0.10562	-91.48187	1	5	0.8
1586	Ayora	Sep	2003	21.7	Day	Observer	Isabela Norte y Este	Isabela	West	104	0.10562	-91.48187	2	5	1
1587	Villamil	Sep	2003	21.7	Day	Landing	Isabela Norte y Este	Isabela	West	40.8	-0.58936	-90.94234	2	4	0.5125
1588	Villamil	Sep	2003	21.7	Day	Landing	Isabela Norte y Este	Isabela	West	40.8	-0.58936	-90.94234	1	4	0.35
1589	Baquerizo	Sep	2003	21.7	Night	Landing	Isabela Norte y Este	Isabela	West	88.3	-0.4944	-90.95	2	16	3.181875
1590	Ayora	Sep	2003	20.6	Night	Landing	Isabela Oeste	Isabela	West	97.6	-0.74136	-91.3916	1	4	5.17
1591	Ayora	Sep	2003	20.6	Day	Landing	Isabela Oeste	Isabela	West	129	-0.03656	-91.43063	1	12	1.816666667
1592	Ayora	Sep	2003	20.6	Day	Observer	Isabela Oeste	Isabela	West	134	-0.20402	-91.38708	1	5	1
1593	Ayora	Sep	2003	20.6	Day	Observer	Isabela Oeste	Isabela	West	117	-0.38585	-91.24987	1	5	1.3
1594	Ayora	Sep	2003	20.6	Day	Observer	Isabela Oeste	Isabela	West	117	-0.43544	-91.23636	1	5	1.9
1595	Ayora	Sep	2003	20.6	Day	Observer	Isabela Oeste	Isabela	West	134	-0.2012	-91.39145	1	5	0.9
1596	Ayora	Sep	2003	20.6	Night	Observer	Isabela Oeste	Isabela	West	138	-0.0627	-91.40737	2	4	1.9375
1597	Ayora	Sep	2003	20.6	Day	Observer	Isabela Oeste	Isabela	West	134	-0.20402	-91.38708	1	5	1.2
1598	Ayora	Sep	2003	20.6	Day	Observer	Isabela Oeste	Isabela	West	134	-0.20402	-91.38708	2	5	0.25
1599	Ayora	Sep	2003	20.6	Day	Observer	Isabela Oeste	Isabela	West	134	-0.20402	-91.38708	2	5	0.45
1600	Ayora	Sep	2003	20.6	Day	Observer	Isabela Oeste	Isabela	West	117	-0.38585	-91.24987	2	5	0.45
1601	Ayora	Sep	2003	20.6	Day	Observer	Isabela Oeste	Isabela	West	117	-0.38585	-91.24987	2	5	0.65
1602	Ayora	Sep	2003	20.6	Day	Observer	Isabela Oeste	Isabela	West	117	-0.38585	-91.24987	2	3	1.583333333
1603	Ayora	Sep	2003	20.6	Day	Observer	Isabela Oeste	Isabela	West	117	-0.38585	-91.24987	1	5	2.1
1604	Ayora	Sep	2003	20.6	Day	Observer	Isabela Oeste	Isabela	West	117	-0.38585	-91.24987	1	5	1
1605	Ayora	Sep	2003	20.6	Day	Observer	Isabela Oeste	Isabela	West	138	-0.0627	-91.40737	9	4	0.430555556
1606	Ayora	Sep	2003	20.6	Day	Observer	Isabela Oeste	Isabela	West	134	-0.20402	-91.38708	9	5	0.5
1607	Ayora	Sep	2003	20.6	Day	Observer	Isabela Oeste	Isabela	West	117	-0.38585	-91.24987	9	5	0.944444444
1608	Villamil	Sep	2003	20.6	Day	Landing	Isabela Oeste	Isabela	West	76.7	-0.43544	-91.23636	1	15	0.545333333
1609	Villamil	Sep	2003	20.6	Day	Landing	Isabela Oeste	Isabela	West	76.7	-0.43544	-91.23636	1	15	1.590666667
1610	Villamil	Sep	2003	20.6	Day	Landing	Isabela Oeste	Isabela	West	76.7	-0.43544	-91.23636	2	19	0.842105263
1611	Villamil	Sep	2003	20.6	Day	Landing	Isabela Oeste	Isabela	West	76.7	-0.43544	-91.23636	2	10	3.295
1612	Villamil	Sep	2003	20.6	Day	Landing	Isabela Oeste	Isabela	West	51.7	-0.74136	-91.3916	1	32	0.4375
1613	Baquerizo	Sep	2003	20.6	Night	Observer	Isabela Oeste	Isabela	West	178	-0.57344	-90.72144	1	5	1.9
1614	Baquerizo	Sep	2003	20.6	Night	Observer	Isabela Oeste	Isabela	West	178	-0.57378	-90.72167	2	6	0.45
1615	Baquerizo	Sep	2003	20.6	Night	Observer	Isabela Oeste	Isabela	West	178	-0.49371	-91.20542	2	5	0.47
1616	Baquerizo	Sep	2003	20.6	Night	Observer	Isabela Oeste	Isabela	West	178	-0.49371	-91.20542	2	5	1
1617	Baquerizo	Sep	2003	20.6	Night	Observer	Isabela Oeste	Isabela	West	178	-0.49371	-91.20542	2	4	1.5625
1618	Ayora	Sep	2003	20.9	Night	Landing	Isabela Sur	Isabela	West	33.3	-0.79173	-90.81927	1	2.5	2.816
1619	Villamil	Sep	2003	20.9	Day	Landing	Isabela Sur	Isabela	West	17	-0.79173	-90.81927	1	6	2.083333333
1620	Villamil	Sep	2003	20.9	Day	Landing	Isabela Sur	Isabela	West	17	-0.79173	-90.81927	1	3	0.166666667
1621	Villamil	Sep	2003	20.9	Day	Landing	Isabela Sur	Isabela	West	17	-0.79173	-90.81927	1	4	0.45
1622	Villamil	Sep	2003	20.9	Day	Landing	Isabela Sur	Isabela	West	4.83	-1.0041	-91.039	1	5	1
1623	Villamil	Sep	2003	20.9	Day	Landing	Isabela Sur	Isabela	West	4.83	-1.0041	-91.039	1	5	0.59
1624	Villamil	Sep	2003	20.9	Day	Landing	Isabela Sur	Isabela	West	4.83	-1.0041	-91.039	1	4	0.1125
1625	Villamil	Sep	2003	20.9	Day	Landing	Isabela Sur	Isabela	West	4.83	-1.0041	-91.039	1	4	0.1
1626	Villamil	Sep	2003	20.9	Day	Landing	Isabela Sur	Isabela	West	4.83	-1.0041	-91.039	1	2.5	1.2
1627	Villamil	Sep	2003	20.9	Day	Landing	Isabela Sur	Isabela	West	4.83	-1.0041	-91.039	2	5	0.09
1628	Villamil	Sep	2003	20.9	Day	Landing	Isabela Sur	Isabela	West	4.83	-1.0041	-91.039	2	5	0.18
1629	Villamil	Sep	2003	20.9	Day	Landing	Isabela Sur	Isabela	West	4.83	-1.0041	-91.039	1	2	1
1630	Villamil	Sep	2003	20.9	Day	Landing	Isabela Sur	Isabela	West	4.83	-1.0041	-91.039	1	4	1.125
1631	Villamil	Sep	2003	20.9	Day	Landing	Isabela Sur	Isabela	West	4.83	-1.0041	-91.039	2	5	0.09
1632	Villamil	Sep	2003	20.9	Day	Observer	Isabela Sur	Isabela	West	4.83	-0.97607	-90.98473	1	3	0.833333333
1633	Villamil	Sep	2003	20.9	Day	Landing	Isabela Sur	Isabela	West	4.83	-1.0041	-91.039	1	3	0.166666667
1634	Villamil	Sep	2003	20.9	Day	Landing	Isabela Sur	Isabela	West	4.83	-1.0041	-91.039	2	2	0.225
1635	Villamil	Sep	2003	20.9	Day	Landing	Isabela Sur	Isabela	West	4.83	-1.0041	-91.039	2	3	0.15
1636	Villamil	Sep	2003	20.9	Day	Landing	Isabela Sur	Isabela	West	4.83	-1.0041	-91.039	2	1	2.05
1637	Villamil	Sep	2003	20.9	Day	Landing	Isabela Sur	Isabela	West	14.7	-1.05069	-91.17433	2	14	0.860714286
1638	Villamil	Sep	2003	20.9	Day	Landing	Isabela Sur	Isabela	West	14.7	-1.05069	-91.17433	2	5	0.55
1639	Villamil	Sep	2003	20.9	Day	Landing	Isabela Sur	Isabela	West	14.7	-1.05069	-91.17433	1	3	1.066666667
1640	Villamil	Sep	2003	20.9	Day	Landing	Isabela Sur	Isabela	West	14.7	-1.05069	-91.17433	1	5	1
1641	Villamil	Sep	2003	20.9	Day	Landing	Isabela Sur	Isabela	West	14.7	-1.05069	-91.17433	1	4	1.65
1642	Villamil	Sep	2003	20.9	Day	Landing	Isabela Sur	Isabela	West	14.7	-1.05069	-91.17433	2	8	0.25625
1643	Villamil	Sep	2003	20.9	Day	Landing	Isabela Sur	Isabela	West	14.7	-1.05069	-91.17433	2	8	0.1125
1644	Villamil	Sep	2003	20.9	Day	Landing	Isabela Sur	Isabela	West	14.7	-1.05069	-91.17433	1	4	3.125
1645	Villamil	Sep	2003	20.9	Night	Landing	Isabela Sur	Isabela	West	1.93	-0.97723	-90.98803	1	2	0.115
1646	Villamil	Sep	2003	20.9	Night	Landing	Isabela Sur	Isabela	West	1.93	-0.97723	-90.98803	1	2	0.225
1647	Villamil	Sep	2003	20.9	Day	Landing	Isabela Sur	Isabela	West	1.93	-0.97723	-90.98803	2	5	0.341
1648	Villamil	Sep	2003	20.9	Day	Landing	Isabela Sur	Isabela	West	1.93	-0.97723	-90.98803	1	3	0.766666667
1649	Villamil	Sep	2003	20.9	Day	Landing	Isabela Sur	Isabela	West	12.2	-1.0394	-91.1467	2	10	0.92
1650	Villamil	Sep	2003	20.9	Day	Landing	Isabela Sur	Isabela	West	12.2	-1.0394	-91.1467	1	15	2.913333333
1651	Villamil	Sep	2003	20.9	Day	Landing	Isabela Sur	Isabela	West	34.2	-0.95519	-91.461	2	15	0.17
1652	Villamil	Sep	2003	20.9	Day	Landing	Isabela Sur	Isabela	West	9.18	-1.02	-91.1	1	4	0.5675
1653	Villamil	Sep	2003	20.9	Day	Landing	Isabela Sur	Isabela	West	9.18	-1.02	-91.1	2	4	0.1125
1654	Villamil	Sep	2003	20.9	Day	Landing	Isabela Sur	Isabela	West	9.18	-1.02	-91.1	1	3	0.3
1655	Villamil	Sep	2003	20.9	Day	Landing	Isabela Sur	Isabela	West	9.18	-1.02	-91.1	1	5	0.1
1656	Villamil	Sep	2003	20.9	Day	Landing	Isabela Sur	Isabela	West	9.18	-1.02	-91.1	1	5	1.28
1657	Villamil	Sep	2003	20.9	Day	Landing	Isabela Sur	Isabela	West	9.18	-1.02	-91.1	1	5	0.18
1658	Villamil	Sep	2003	20.9	Day	Landing	Isabela Sur	Isabela	West	9.18	-1.02	-91.1	1	5	0.18
1659	Villamil	Sep	2003	20.9	Day	Landing	Isabela Sur	Isabela	West	9.18	-1.02	-91.1	2	5	0.02
1660	Villamil	Sep	2003	20.9	Day	Landing	Isabela Sur	Isabela	West	9.18	-1.02	-91.1	2	5	0.18
1661	Villamil	Sep	2003	20.9	Day	Observer	Isabela Sur	Isabela	West	9.18	-0.96607	-90.87264	1	4	0.175
1662	Villamil	Sep	2003	20.9	Day	Observer	Isabela Sur	Isabela	West	9.18	-0.96607	-90.87264	1	2	0.35
1663	Villamil	Sep	2003	20.9	Day	Observer	Isabela Sur	Isabela	West	9.18	-0.96607	-90.87264	1	3	0.766666667
1664	Villamil	Sep	2003	20.9	Day	Observer	Isabela Sur	Isabela	West	9.18	-0.96607	-90.87264	1	3	0.9
1665	Villamil	Sep	2003	20.9	Night	Landing	Isabela Sur	Isabela	West	9.18	-1.02	-91.1	1	5	1.36
1666	Villamil	Sep	2003	20.9	Day	Landing	Isabela Sur	Isabela	West	9.18	-1.02	-91.1	1	5	0.32
1667	Villamil	Sep	2003	20.9	Day	Landing	Isabela Sur	Isabela	West	9.18	-1.02	-91.1	1	5	0.28
1668	Villamil	Sep	2003	20.9	Day	Landing	Isabela Sur	Isabela	West	1.21	-0.978203	-90.95763	1	3	0.6
1669	Villamil	Sep	2003	20.9	Day	Landing	Isabela Sur	Isabela	West	2.1	-0.9711	-90.9343	1	4	0.05
1670	Villamil	Sep	2003	20.9	Day	Landing	Isabela Sur	Isabela	West	14.9	-1.04912	-91.18457	2	18	0.619444444
1671	Villamil	Sep	2003	20.9	Night	Landing	Isabela Sur	Isabela	West	14.9	-1.04912	-91.18457	1	8	0.625
1672	Villamil	Sep	2003	20.9	Day	Landing	Isabela Sur	Isabela	West	6.56	-1.01864	-91.05577	2	5	0.45
1673	Villamil	Sep	2003	20.9	Day	Landing	Isabela Sur	Isabela	West	6.56	-1.01864	-91.05577	2	5	0.36
1674	Villamil	Sep	2003	20.9	Day	Landing	Isabela Sur	Isabela	West	6.56	-1.01864	-91.05577	2	4	0.0875
1675	Villamil	Sep	2003	20.9	Day	Landing	Isabela Sur	Isabela	West	6.56	-1.01864	-91.05577	2	5	0.09
1676	Villamil	Sep	2003	20.9	Day	Landing	Isabela Sur	Isabela	West	6.56	-1.01864	-91.05577	1	5	0.1
1677	Villamil	Sep	2003	20.9	Day	Landing	Isabela Sur	Isabela	West	6.56	-1.01864	-91.05577	2	5	0.36
1678	Villamil	Sep	2003	20.9	Day	Landing	Isabela Sur	Isabela	West	6.56	-1.01864	-91.05577	2	5	0.05
1679	Villamil	Sep	2003	20.9	Day	Landing	Isabela Sur	Isabela	West	6.56	-1.01864	-91.05577	1	5	0.04
1680	Villamil	Sep	2003	20.9	Night	Landing	Isabela Sur	Isabela	West	8.1	-0.92	-90.85	1	3	0.833333333
1681	Villamil	Sep	2003	20.9	Day	Landing	Isabela Sur	Isabela	West	9.22	-1.03944	-91.0943	1	3	0.166666667
1682	Villamil	Sep	2003	20.9	Day	Landing	Isabela Sur	Isabela	West	9.22	-1.03944	-91.0943	2	4	0.375
1683	Villamil	Sep	2003	20.9	Day	Landing	Isabela Sur	Isabela	West	9.22	-1.03944	-91.0943	1	5	0.18
1684	Villamil	Sep	2003	20.9	Day	Landing	Isabela Sur	Isabela	West	9.22	-1.03944	-91.0943	1	5	0.18
1685	Villamil	Sep	2003	20.9	Day	Landing	Isabela Sur	Isabela	West	9.22	-1.03944	-91.0943	1	5	0.04
1686	Ayora	Sep	2003	22.8	Day	Landing	Marchena	Marchena	North	104	0.640889	-90.76494	2	24	0.18125
1687	Baquerizo	Sep	2003	22.8	Night	Landing	Marchena	Marchena	North	100	0.640889	-90.76494	3	16	1.505625
1688	Baquerizo	Sep	2003	22.8	Night	Observer	Marchena	Marchena	North	109	0.38535	-90.49852	2	5	1.45
1689	Baquerizo	Sep	2003	22.8	Night	Observer	Marchena	Marchena	North	104	0.3668833	-90.4402418	2	5	0.77
1690	Baquerizo	Sep	2003	22.8	Night	Observer	Marchena	Marchena	North	109	0.38535	-90.49852	2	6	0.541666667
1691	Baquerizo	Sep	2003	22.8	Night	Observer	Marchena	Marchena	North	109	0.38535	-90.49852	1	5	1.9
1692	Baquerizo	Sep	2003	22.8	Night	Observer	Marchena	Marchena	North	109	0.38535	-90.49852	1	5	3.8
1693	Baquerizo	Sep	2003	22.8	Night	Observer	Marchena	Marchena	North	109	0.38535	-90.49852	2	5	2.54
1694	Baquerizo	Sep	2003	22.8	Night	Observer	Marchena	Marchena	North	109	0.38535	-90.49852	1	7	2.985714286
1695	Baquerizo	Sep	2003	22.8	Night	Observer	Marchena	Marchena	North	109	0.38535	-90.49852	2	5	1.09
1696	Baquerizo	Sep	2003	22.8	Night	Observer	Marchena	Marchena	North	104	0.35294	-90.42539	2	5	2.9
1697	Baquerizo	Sep	2003	22.8	Night	Observer	Marchena	Marchena	North	104	0.3668833	-90.4402418	2	6	0.958333333
1698	Baquerizo	Sep	2003	22.8	Night	Observer	Marchena	Marchena	North	104	0.3668833	-90.4402418	2	4	0.7
1699	Baquerizo	Sep	2003	22.8	Night	Observer	Marchena	Marchena	North	104	0.3668833	-90.4402418	1	4	0.675
1700	Baquerizo	Sep	2003	22.8	Night	Observer	Marchena	Marchena	North	109	0.38535	-90.49852	2	5	2.06
1701	Baquerizo	Sep	2003	22.8	Night	Observer	Marchena	Marchena	North	109	0.38535	-90.49852	1	3	0.833333333
1702	Baquerizo	Sep	2003	22.8	Night	Observer	Marchena	Marchena	North	104	0.3668833	-90.4402418	2	5	1.36
1703	Baquerizo	Sep	2003	22.8	Night	Observer	Marchena	Marchena	North	104	0.3668833	-90.4402418	2	5	0.54
1704	Baquerizo	Sep	2003	22.8	Night	Observer	Marchena	Marchena	North	104	0.3668833	-90.4402418	2	6	0.983333333
1705	Baquerizo	Sep	2003	22.8	Night	Observer	Marchena	Marchena	North	104	0.3668833	-90.4402418	10	40	0.21825
1706	Baquerizo	Oct	2003	23.3	Night	Landing	Espa�ola	Espa�ola	Centre- South	36.6	-1.3477	-89.6749	1	15	1.726666667
1707	Baquerizo	Oct	2003	23.3	Day	Landing	Espa�ola	Espa�ola	Centre- South	33	1.3434	-89.6983	1	14	3.084285714
1708	Ayora	Oct	2003	22.9	Day	Landing	Floreana	Floreana	Centre- South	30.1	-1.258573	-90.3642	1	8	1.1
1709	Ayora	Oct	2003	24	Day	Observer	Isabela Norte y Este	Isabela	West	42.2	-0.58936	-90.94234	1	4	0.475
1710	Ayora	Oct	2003	24	Day	Observer	Isabela Norte y Este	Isabela	West	42.2	-0.58936	-90.94234	2	4	0.1875
1711	Ayora	Oct	2003	24	Day	Observer	Isabela Norte y Este	Isabela	West	42.2	-0.60592	-90.8937	1	5	1
1712	Ayora	Oct	2003	24	Day	Observer	Isabela Norte y Este	Isabela	West	42.2	-0.60592	-90.8937	1	5	0.2
1713	Ayora	Oct	2003	24	Day	Landing	Isabela Norte y Este	Isabela	West	90.6	0.1711	-91.3558	2	24	0.880625
1714	Ayora	Oct	2003	24	Day	Landing	Isabela Norte y Este	Isabela	West	47.3	-0.4944	-90.95	2	12	1.155416667
1715	Ayora	Oct	2003	24	Day	Landing	Isabela Norte y Este	Isabela	West	61.2	-0.3039	-91.0875	1	12	3.863333333
1716	Ayora	Oct	2003	24	Day	Landing	Isabela Norte y Este	Isabela	West	90.6	0.1711	-91.3558	1	15	1.94
1717	Villamil	Oct	2003	24	Day	Landing	Isabela Norte y Este	Isabela	West	40.8	-0.58936	-90.94234	2	15	1.44
1718	Baquerizo	Oct	2003	24	Night	Landing	Isabela Norte y Este	Isabela	West	143	0.1711	-91.3558	9	12	0.276296296
1719	Ayora	Oct	2003	22.4	Night	Landing	Isabela Oeste	Isabela	West	97.6	-0.74136	-91.3916	1	8	1.725
1720	Ayora	Oct	2003	22.4	Day	Landing	Isabela Oeste	Isabela	West	117	-0.43544	-91.23636	1	6	3.866666667
1721	Baquerizo	Oct	2003	22.4	Night	Landing	Isabela Oeste	Isabela	West	178	-0.43544	-91.23636	9	24	0.069166667
1722	Ayora	Oct	2003	22.8	Day	Landing	Isabela Sur	Isabela	West	63.3	-1.0358	-91.2282	4	25	0.418
1723	Villamil	Oct	2003	22.8	Day	Landing	Isabela Sur	Isabela	West	17	-0.79173	-90.81927	1	8	1.5875
1724	Villamil	Oct	2003	22.8	Day	Landing	Isabela Sur	Isabela	West	17	-0.79173	-90.81927	1	4	2.275
1725	Villamil	Oct	2003	22.8	Day	Landing	Isabela Sur	Isabela	West	17	-0.79173	-90.81927	1	3.5	1.942857143
1726	Villamil	Oct	2003	22.8	Day	Landing	Isabela Sur	Isabela	West	17	-0.79173	-90.81927	1	3	2.4
1727	Villamil	Oct	2003	22.8	Day	Landing	Isabela Sur	Isabela	West	17	-0.79173	-90.81927	1	3.5	1.428571429
1728	Villamil	Oct	2003	22.8	Day	Landing	Isabela Sur	Isabela	West	4.83	-1.0041	-91.039	1	3	2.433333333
1729	Villamil	Oct	2003	22.8	Day	Landing	Isabela Sur	Isabela	West	4.83	-1.0041	-91.039	1	3	0.6
1730	Villamil	Oct	2003	22.8	Day	Landing	Isabela Sur	Isabela	West	4.83	-1.0041	-91.039	1	3	0.166666667
1731	Villamil	Oct	2003	22.8	Day	Landing	Isabela Sur	Isabela	West	4.83	-1.0041	-91.039	1	4	0.175
1732	Villamil	Oct	2003	22.8	Night	Landing	Isabela Sur	Isabela	West	4.83	-1.0041	-91.039	1	4	0.125
1733	Villamil	Oct	2003	22.8	Day	Landing	Isabela Sur	Isabela	West	4.83	-1.0041	-91.039	2	4	0.5125
1734	Villamil	Oct	2003	22.8	Night	Landing	Isabela Sur	Isabela	West	4.83	-1.0041	-91.039	1	3	0.466666667
1735	Villamil	Oct	2003	22.8	Day	Landing	Isabela Sur	Isabela	West	4.83	-1.0041	-91.039	1	4	0.35
1736	Villamil	Oct	2003	22.8	Day	Landing	Isabela Sur	Isabela	West	4.83	-1.0041	-91.039	1	4	0.1
1737	Villamil	Oct	2003	22.8	Day	Landing	Isabela Sur	Isabela	West	4.83	-1.0041	-91.039	1	2.5	0.456
1738	Villamil	Oct	2003	22.8	Day	Landing	Isabela Sur	Isabela	West	4.83	-1.0041	-91.039	1	3	0.733333333
1739	Villamil	Oct	2003	22.8	Day	Landing	Isabela Sur	Isabela	West	4.83	-1.0041	-91.039	1	3	0.433333333
1740	Villamil	Oct	2003	22.8	Day	Landing	Isabela Sur	Isabela	West	14.7	-1.05069	-91.17433	1	5	0.04
1741	Villamil	Oct	2003	22.8	Day	Landing	Isabela Sur	Isabela	West	14.7	-1.05069	-91.17433	1	8	0.3125
1742	Villamil	Oct	2003	22.8	Day	Landing	Isabela Sur	Isabela	West	14.7	-1.05069	-91.17433	2	5	0.48
1743	Villamil	Oct	2003	22.8	Day	Landing	Isabela Sur	Isabela	West	14.7	-1.05069	-91.17433	2	5	0.48
1744	Villamil	Oct	2003	22.8	Day	Landing	Isabela Sur	Isabela	West	14.7	-1.05069	-91.17433	1	5	0.28
1745	Villamil	Oct	2003	22.8	Day	Landing	Isabela Sur	Isabela	West	14.7	-1.05069	-91.17433	1	5	0.86
1746	Villamil	Oct	2003	22.8	Day	Landing	Isabela Sur	Isabela	West	14.7	-1.05069	-91.17433	1	4	0.125
1747	Villamil	Oct	2003	22.8	Day	Landing	Isabela Sur	Isabela	West	14.7	-1.05069	-91.17433	2	4	0.0875
1748	Villamil	Oct	2003	22.8	Day	Landing	Isabela Sur	Isabela	West	14.7	-1.05069	-91.17433	1	4	0.575
1749	Villamil	Oct	2003	22.8	Day	Landing	Isabela Sur	Isabela	West	14.7	-1.05069	-91.17433	1	8	1.1875
1750	Villamil	Oct	2003	22.8	Night	Landing	Isabela Sur	Isabela	West	14.7	-1.05069	-91.17433	1	3	1.066666667
1751	Villamil	Oct	2003	22.8	Day	Landing	Isabela Sur	Isabela	West	14.7	-1.05069	-91.17433	1	4	2.625
1752	Villamil	Oct	2003	22.8	Day	Landing	Isabela Sur	Isabela	West	14.7	-1.05069	-91.17433	1	8	0.225
1753	Villamil	Oct	2003	22.8	Day	Landing	Isabela Sur	Isabela	West	14.7	-1.05069	-91.17433	1	2	1.6
1754	Villamil	Oct	2003	22.8	Day	Landing	Isabela Sur	Isabela	West	14.7	-1.05069	-91.17433	2	12	0.454166667
1755	Villamil	Oct	2003	22.8	Day	Landing	Isabela Sur	Isabela	West	0.52	-0.96708	-90.9665	1	3	0.9
1756	Villamil	Oct	2003	22.8	Night	Landing	Isabela Sur	Isabela	West	1.93	-0.97723	-90.98803	1	3	0.3
1757	Villamil	Oct	2003	22.8	Day	Landing	Isabela Sur	Isabela	West	1.93	-0.97723	-90.98803	1	4	0.975
1758	Villamil	Oct	2003	22.8	Day	Landing	Isabela Sur	Isabela	West	1.93	-0.97723	-90.98803	2	9	0.027777778
1759	Villamil	Oct	2003	22.8	Night	Landing	Isabela Sur	Isabela	West	12.2	-1.0394	-91.1467	1	4	3.3
1760	Villamil	Oct	2003	22.8	Day	Observer	Isabela Sur	Isabela	West	12.2	-1.04325	-91.16247	1	7	2.6
1761	Villamil	Oct	2003	22.8	Day	Observer	Isabela Sur	Isabela	West	12.2	-1.03939	-91.14686	1	8	1.075
1762	Villamil	Oct	2003	22.8	Day	Landing	Isabela Sur	Isabela	West	12.2	-1.0394	-91.1467	1	3	1.366666667
1763	Villamil	Oct	2003	22.8	Day	Observer	Isabela Sur	Isabela	West	12.2	-1.04331	-91.16294	1	7	0.811428571
1764	Villamil	Oct	2003	22.8	Day	Observer	Isabela Sur	Isabela	West	12.2	-1.03475	-91.14765	1	3	1.893333333
1765	Villamil	Oct	2003	22.8	Day	Landing	Isabela Sur	Isabela	West	12.2	-1.0394	-91.1467	1	35	0.142857143
1766	Villamil	Oct	2003	22.8	Day	Landing	Isabela Sur	Isabela	West	12.2	-1.0394	-91.1467	1	14	2.4
1767	Villamil	Oct	2003	22.8	Day	Landing	Isabela Sur	Isabela	West	12.2	-1.0394	-91.1467	1	20	0.475
1768	Villamil	Oct	2003	22.8	Day	Landing	Isabela Sur	Isabela	West	12.2	-1.0394	-91.1467	1	2	1.35
1769	Villamil	Oct	2003	22.8	Day	Landing	Isabela Sur	Isabela	West	12.2	-1.0394	-91.1467	2	3.5	0.071428571
1770	Villamil	Oct	2003	22.8	Day	Landing	Isabela Sur	Isabela	West	12.2	-1.0394	-91.1467	2	15	0.56
1771	Villamil	Oct	2003	22.8	Day	Landing	Isabela Sur	Isabela	West	12.2	-1.0394	-91.1467	1	18	1.366666667
1772	Villamil	Oct	2003	22.8	Day	Landing	Isabela Sur	Isabela	West	34.2	-0.95519	-91.461	1	12	0.133333333
1773	Villamil	Oct	2003	22.8	Day	Landing	Isabela Sur	Isabela	West	7.27	-1.0306	-90.8846	1	4	0.575
1774	Villamil	Oct	2003	22.8	Day	Landing	Isabela Sur	Isabela	West	9.18	-1.02	-91.1	1	3	0.166666667
1775	Villamil	Oct	2003	22.8	Day	Landing	Isabela Sur	Isabela	West	9.18	-1.02	-91.1	1	4	0.35
1776	Villamil	Oct	2003	22.8	Day	Landing	Isabela Sur	Isabela	West	9.18	-1.02	-91.1	1	5	0.6
1777	Villamil	Oct	2003	22.8	Day	Landing	Isabela Sur	Isabela	West	9.18	-1.02	-91.1	1	5	0.18
1778	Villamil	Oct	2003	22.8	Day	Landing	Isabela Sur	Isabela	West	9.18	-1.02	-91.1	2	5	0.23
1779	Villamil	Oct	2003	22.8	Day	Landing	Isabela Sur	Isabela	West	9.18	-1.02	-91.1	1	5	0.82
1780	Villamil	Oct	2003	22.8	Day	Landing	Isabela Sur	Isabela	West	9.18	-1.02	-91.1	1	5	0.64
1781	Villamil	Oct	2003	22.8	Day	Landing	Isabela Sur	Isabela	West	9.18	-1.02	-91.1	1	5	0.1
1782	Villamil	Oct	2003	22.8	Day	Landing	Isabela Sur	Isabela	West	9.18	-1.02	-91.1	1	4	0.4
1783	Villamil	Oct	2003	22.8	Night	Landing	Isabela Sur	Isabela	West	9.18	-1.02	-91.1	2	4	2.8375
1784	Villamil	Oct	2003	22.8	Day	Landing	Isabela Sur	Isabela	West	9.18	-1.02	-91.1	1	4	0.125
1785	Villamil	Oct	2003	22.8	Day	Landing	Isabela Sur	Isabela	West	9.18	-1.02	-91.1	1	4	0.35
1786	Villamil	Oct	2003	22.8	Night	Landing	Isabela Sur	Isabela	West	9.18	-1.02	-91.1	1	4	1.6
1787	Villamil	Oct	2003	22.8	Day	Landing	Isabela Sur	Isabela	West	9.18	-1.02	-91.1	1	10	0.64
1788	Villamil	Oct	2003	22.8	Day	Landing	Isabela Sur	Isabela	West	9.18	-1.02	-91.1	1	3	1.6
1789	Villamil	Oct	2003	22.8	Day	Landing	Isabela Sur	Isabela	West	9.18	-1.02	-91.1	2	3	0.3
1790	Villamil	Oct	2003	22.8	Day	Landing	Isabela Sur	Isabela	West	9.18	-1.02	-91.1	2	4	0.3875
1791	Villamil	Oct	2003	22.8	Day	Landing	Isabela Sur	Isabela	West	9.18	-1.02	-91.1	1	4	0.1
1792	Villamil	Oct	2003	22.8	Day	Landing	Isabela Sur	Isabela	West	9.18	-1.02	-91.1	1	4	0.45
1793	Villamil	Oct	2003	22.8	Day	Landing	Isabela Sur	Isabela	West	9.18	-1.02	-91.1	1	3	0.066666667
1794	Villamil	Oct	2003	22.8	Day	Landing	Isabela Sur	Isabela	West	9.18	-1.02	-91.1	1	3	0.2
1795	Villamil	Oct	2003	22.8	Day	Landing	Isabela Sur	Isabela	West	9.18	-1.02	-91.1	1	4	0.625
1796	Villamil	Oct	2003	22.8	Day	Landing	Isabela Sur	Isabela	West	9.18	-1.02	-91.1	1	15	0.18
1797	Villamil	Oct	2003	22.8	Day	Landing	Isabela Sur	Isabela	West	9.18	-1.02	-91.1	1	18	0.177777778
1798	Villamil	Oct	2003	22.8	Day	Landing	Isabela Sur	Isabela	West	9.18	-1.02	-91.1	1	3	1.433333333
1799	Villamil	Oct	2003	22.8	Day	Landing	Isabela Sur	Isabela	West	9.18	-1.02	-91.1	1	3	1.966666667
1800	Villamil	Oct	2003	22.8	Day	Landing	Isabela Sur	Isabela	West	1.21	-0.978203	-90.95763	1	3	0.9
1801	Villamil	Oct	2003	22.8	Day	Landing	Isabela Sur	Isabela	West	1.21	-0.978203	-90.95763	1	3.5	1.228571429
1802	Villamil	Oct	2003	22.8	Day	Landing	Isabela Sur	Isabela	West	1.21	-0.978203	-90.95763	1	3	0.076666667
1803	Villamil	Oct	2003	22.8	Day	Landing	Isabela Sur	Isabela	West	1.21	-0.978203	-90.95763	2	3	0.341666667
1804	Villamil	Oct	2003	22.8	Day	Landing	Isabela Sur	Isabela	West	1.21	-0.978203	-90.95763	1	2.5	0.092
1805	Villamil	Oct	2003	22.8	Night	Landing	Isabela Sur	Isabela	West	1.21	-0.978203	-90.95763	1	3	1.833333333
1806	Villamil	Oct	2003	22.8	Day	Landing	Isabela Sur	Isabela	West	1.21	-0.978203	-90.95763	1	3	2.133333333
1807	Villamil	Oct	2003	22.8	Day	Landing	Isabela Sur	Isabela	West	1.21	-0.978203	-90.95763	1	3	0.6
1808	Villamil	Oct	2003	22.8	Day	Landing	Isabela Sur	Isabela	West	2.1	-0.9711	-90.9343	1	3	0.233333333
1809	Villamil	Oct	2003	22.8	Day	Landing	Isabela Sur	Isabela	West	2.1	-0.9711	-90.9343	1	2	5.25
1810	Villamil	Oct	2003	22.8	Day	Landing	Isabela Sur	Isabela	West	14.9	-1.04912	-91.18457	2	8	1.59375
1811	Villamil	Oct	2003	22.8	Day	Landing	Isabela Sur	Isabela	West	14.9	-1.04912	-91.18457	1	12	2.275
1812	Villamil	Oct	2003	22.8	Day	Landing	Isabela Sur	Isabela	West	14.9	-1.04912	-91.18457	1	12	1.891666667
1813	Villamil	Oct	2003	22.8	Day	Landing	Isabela Sur	Isabela	West	14.9	-1.04912	-91.18457	2	20	0.97
1814	Villamil	Oct	2003	22.8	Day	Landing	Isabela Sur	Isabela	West	14.9	-1.04912	-91.18457	1	12	0.883333333
1815	Villamil	Oct	2003	22.8	Day	Landing	Isabela Sur	Isabela	West	9.22	-1.03944	-91.0943	2	4	0.225
1816	Baquerizo	Oct	2003	25	Night	Landing	Marchena	Marchena	North	100	0.640889	-90.76494	5	14	0.683
1817	Baquerizo	Nov	2003	22.7	Night	Landing	Espa�ola	Espa�ola	Centre- South	36.6	-1.3477	-89.6749	8	60	0.134375
1818	Baquerizo	Nov	2003	22.7	Night	Landing	Espa�ola	Espa�ola	Centre- South	36.6	-1.3477	-89.6749	5	20	1.3697
1819	Ayora	Nov	2003	23.7	Day	Observer	Isabela Norte y Este	Isabela	West	42.2	-0.52844	-90.94832	1	3	0.077777778
1820	Ayora	Nov	2003	23.7	Day	Observer	Isabela Norte y Este	Isabela	West	42.2	-0.62653	-90.88127	1	3	0.133333333
1821	Ayora	Nov	2003	23.7	Day	Landing	Isabela Norte y Este	Isabela	West	42.2	-0.58936	-90.94234	2	13	0.297307692
1822	Ayora	Nov	2003	22.5	Day	Landing	Isabela Oeste	Isabela	West	113	-0.49371	-91.20542	2	4	0.5
1823	Villamil	Nov	2003	22.5	Day	Landing	Isabela Oeste	Isabela	West	76.7	-0.43544	-91.23636	1	30	1.35
1824	Villamil	Nov	2003	22.5	Day	Landing	Isabela Oeste	Isabela	West	76.7	-0.43544	-91.23636	1	20	0.445
1825	Villamil	Nov	2003	22.5	Day	Landing	Isabela Oeste	Isabela	West	76.7	-0.43544	-91.23636	1	25	1.236
1826	Villamil	Nov	2003	22.5	Day	Landing	Isabela Oeste	Isabela	West	76.7	-0.43544	-91.23636	1	25	1.216
1827	Baquerizo	Nov	2003	22.5	Night	Landing	Isabela Oeste	Isabela	West	161	-0.65789	-91.14564	10	20	0.48
1828	Villamil	Nov	2003	22.2	Day	Landing	Isabela Sur	Isabela	West	3.7	-0.99697	-91.01602	1	4	0.75
1829	Villamil	Nov	2003	22.2	Day	Landing	Isabela Sur	Isabela	West	17	-0.79173	-90.81927	1	1.5	0.6
1830	Villamil	Nov	2003	22.2	Day	Landing	Isabela Sur	Isabela	West	17	-0.79173	-90.81927	1	4	0.625
1831	Villamil	Nov	2003	22.2	Day	Landing	Isabela Sur	Isabela	West	17	-0.79173	-90.81927	2	5	0.36
1832	Villamil	Nov	2003	22.2	Day	Landing	Isabela Sur	Isabela	West	17	-0.79173	-90.81927	2	4	0.65
1833	Villamil	Nov	2003	22.2	Day	Landing	Isabela Sur	Isabela	West	4.83	-1.0041	-91.039	1	3	0.9
1834	Villamil	Nov	2003	22.2	Day	Landing	Isabela Sur	Isabela	West	4.83	-1.0041	-91.039	1	4	0.375
1835	Villamil	Nov	2003	22.2	Night	Landing	Isabela Sur	Isabela	West	4.83	-1.0041	-91.039	1	3	0.733333333
1836	Villamil	Nov	2003	22.2	Day	Landing	Isabela Sur	Isabela	West	4.83	-1.0041	-91.039	2	3	0.083333333
1837	Villamil	Nov	2003	22.2	Day	Landing	Isabela Sur	Isabela	West	4.83	-1.0041	-91.039	1	3	0.066666667
1838	Villamil	Nov	2003	22.2	Day	Landing	Isabela Sur	Isabela	West	4.83	-1.0041	-91.039	1	4	1.125
1839	Villamil	Nov	2003	22.2	Day	Landing	Isabela Sur	Isabela	West	4.83	-1.0041	-91.039	2	4	0.5625
1840	Villamil	Nov	2003	22.2	Day	Landing	Isabela Sur	Isabela	West	4.83	-1.0041	-91.039	1	4	0.15
1841	Villamil	Nov	2003	22.2	Day	Landing	Isabela Sur	Isabela	West	4.83	-1.0041	-91.039	1	4	0.325
1842	Villamil	Nov	2003	22.2	Day	Landing	Isabela Sur	Isabela	West	4.83	-1.0041	-91.039	1	4	0.225
1843	Villamil	Nov	2003	22.2	Day	Landing	Isabela Sur	Isabela	West	4.83	-1.0041	-91.039	1	4	0.1
1844	Villamil	Nov	2003	22.2	Day	Landing	Isabela Sur	Isabela	West	4.83	-1.0041	-91.039	1	5	0.08
1845	Villamil	Nov	2003	22.2	Day	Landing	Isabela Sur	Isabela	West	4.83	-1.0041	-91.039	1	4	0.85
1846	Villamil	Nov	2003	22.2	Day	Landing	Isabela Sur	Isabela	West	4.83	-1.0041	-91.039	1	2	0.25
1847	Villamil	Nov	2003	22.2	Day	Landing	Isabela Sur	Isabela	West	4.83	-1.0041	-91.039	1	4	1.0225
1848	Villamil	Nov	2003	22.2	Day	Landing	Isabela Sur	Isabela	West	4.83	-1.0041	-91.039	2	4	0.3375
1849	Villamil	Nov	2003	22.2	Day	Landing	Isabela Sur	Isabela	West	4.83	-1.0041	-91.039	2	4	0.2125
1850	Villamil	Nov	2003	22.2	Day	Landing	Isabela Sur	Isabela	West	4.83	-1.0041	-91.039	1	4	0.175
1851	Villamil	Nov	2003	22.2	Day	Landing	Isabela Sur	Isabela	West	4.83	-1.0041	-91.039	1	4	0.575
1852	Villamil	Nov	2003	22.2	Day	Landing	Isabela Sur	Isabela	West	4.83	-1.0041	-91.039	1	4	1.425
1853	Villamil	Nov	2003	22.2	Day	Landing	Isabela Sur	Isabela	West	4.83	-1.0041	-91.039	1	4	0.8
1854	Villamil	Nov	2003	22.2	Day	Landing	Isabela Sur	Isabela	West	14.7	-1.05069	-91.17433	1	4	0.375
1855	Villamil	Nov	2003	22.2	Day	Landing	Isabela Sur	Isabela	West	14.7	-1.05069	-91.17433	1	4	0.85
1856	Villamil	Nov	2003	22.2	Day	Observer	Isabela Sur	Isabela	West	14.7	-0.03879	-91.1297	1	6	0.216666667
1857	Villamil	Nov	2003	22.2	Day	Landing	Isabela Sur	Isabela	West	14.7	-1.05069	-91.17433	2	5	0.13
1858	Villamil	Nov	2003	22.2	Day	Landing	Isabela Sur	Isabela	West	14.7	-1.05069	-91.17433	2	4	0.475
1859	Villamil	Nov	2003	22.2	Day	Landing	Isabela Sur	Isabela	West	14.7	-1.05069	-91.17433	2	4	0.6625
1860	Villamil	Nov	2003	22.2	Day	Landing	Isabela Sur	Isabela	West	14.7	-1.05069	-91.17433	1	4	0.275
1861	Villamil	Nov	2003	22.2	Day	Landing	Isabela Sur	Isabela	West	14.7	-1.05069	-91.17433	2	4	0.025
1862	Villamil	Nov	2003	22.2	Day	Landing	Isabela Sur	Isabela	West	14.7	-1.05069	-91.17433	2	4	0.225
1863	Villamil	Nov	2003	22.2	Day	Landing	Isabela Sur	Isabela	West	0.52	-0.96708	-90.9665	1	5	0.22
1864	Villamil	Nov	2003	22.2	Day	Landing	Isabela Sur	Isabela	West	0.52	-0.96708	-90.9665	1	4	0.325
1865	Villamil	Nov	2003	22.2	Day	Landing	Isabela Sur	Isabela	West	0.52	-0.96708	-90.9665	1	4	0.45
1866	Villamil	Nov	2003	22.2	Night	Landing	Isabela Sur	Isabela	West	1.93	-0.97723	-90.98803	1	4	1.075
1867	Villamil	Nov	2003	22.2	Day	Landing	Isabela Sur	Isabela	West	1.93	-0.97723	-90.98803	1	4	0.05
1868	Villamil	Nov	2003	22.2	Night	Landing	Isabela Sur	Isabela	West	1.93	-0.97723	-90.98803	1	4	0.625
1869	Villamil	Nov	2003	22.2	Night	Observer	Isabela Sur	Isabela	West	12.2	-1.034765	-91.15765	1	5	0.26
1870	Villamil	Nov	2003	22.2	Day	Observer	Isabela Sur	Isabela	West	12.2	-1.04718	-91.18785	1	3	0.733333333
1871	Villamil	Nov	2003	22.2	Day	Observer	Isabela Sur	Isabela	West	12.2	-1.04331	-91.16294	1	7	0.385714286
1872	Villamil	Nov	2003	22.2	Day	Observer	Isabela Sur	Isabela	West	12.2	-1.03745	-91.14745	1	6	0.3
1873	Villamil	Nov	2003	22.2	Day	Observer	Isabela Sur	Isabela	West	12.2	-1.09718	-91.14666	1	6	0.3
1874	Villamil	Nov	2003	22.2	Day	Landing	Isabela Sur	Isabela	West	12.2	-1.0394	-91.1467	1	15	0.3
1875	Villamil	Nov	2003	22.2	Day	Landing	Isabela Sur	Isabela	West	12.2	-1.0394	-91.1467	1	20	0.18
1876	Villamil	Nov	2003	22.2	Day	Landing	Isabela Sur	Isabela	West	12.2	-1.0394	-91.1467	1	10	2.04
1877	Villamil	Nov	2003	22.2	Day	Landing	Isabela Sur	Isabela	West	12.2	-1.0394	-91.1467	2	20	0.795
1878	Villamil	Nov	2003	22.2	Day	Observer	Isabela Sur	Isabela	West	12.2	-1.0394	-91.1467	1	10	0.61
1879	Villamil	Nov	2003	22.2	Day	Observer	Isabela Sur	Isabela	West	12.2	-1.0394	-91.1467	1	10	0.55
1880	Villamil	Nov	2003	22.2	Day	Observer	Isabela Sur	Isabela	West	12.2	-1.0394	-91.1467	1	9	0.5
1881	Villamil	Nov	2003	22.2	Day	Observer	Isabela Sur	Isabela	West	12.2	-1.0394	-91.1467	1	10	0.68
1882	Villamil	Nov	2003	22.2	Night	Observer	Isabela Sur	Isabela	West	12.2	-1.0394	-91.1467	1	3	0.166666667
1883	Villamil	Nov	2003	22.2	Day	Observer	Isabela Sur	Isabela	West	12.2	-1.0394	-91.1467	1	7	0.1
1884	Villamil	Nov	2003	22.2	Day	Observer	Isabela Sur	Isabela	West	12.2	-1.0394	-91.1467	1	5	0.28
1885	Villamil	Nov	2003	22.2	Day	Landing	Isabela Sur	Isabela	West	10.5	-0.89	-90.84	1	4	1.925
1886	Villamil	Nov	2003	22.2	Day	Landing	Isabela Sur	Isabela	West	22.7	-0.72072	-90.80723	1	2	0.1
1887	Villamil	Nov	2003	22.2	Day	Landing	Isabela Sur	Isabela	West	22.7	-0.72072	-90.80723	1	2	1.1
1888	Villamil	Nov	2003	22.2	Day	Landing	Isabela Sur	Isabela	West	34.2	-0.95519	-91.461	1	30	0.106666667
1889	Villamil	Nov	2003	22.2	Day	Landing	Isabela Sur	Isabela	West	34.2	-0.95519	-91.461	2	30	0.628333333
1890	Villamil	Nov	2003	22.2	Day	Landing	Isabela Sur	Isabela	West	7.27	-1.0306	-90.8846	1	4	0.725
1891	Villamil	Nov	2003	22.2	Day	Landing	Isabela Sur	Isabela	West	9.18	-1.02	-91.1	1	4	0.1
1892	Villamil	Nov	2003	22.2	Day	Landing	Isabela Sur	Isabela	West	9.18	-1.02	-91.1	1	4	0.1
1893	Villamil	Nov	2003	22.2	Day	Landing	Isabela Sur	Isabela	West	9.18	-1.02	-91.1	1	3	0.833333333
1894	Villamil	Nov	2003	22.2	Day	Landing	Isabela Sur	Isabela	West	9.18	-1.02	-91.1	1	4	0.35
1895	Villamil	Nov	2003	22.2	Day	Landing	Isabela Sur	Isabela	West	9.18	-1.02	-91.1	1	4	0.05
1896	Villamil	Nov	2003	22.2	Day	Landing	Isabela Sur	Isabela	West	9.18	-1.02	-91.1	1	4	0.05
1897	Villamil	Nov	2003	22.2	Day	Landing	Isabela Sur	Isabela	West	9.18	-1.02	-91.1	1	3	1.8
1898	Villamil	Nov	2003	22.2	Day	Landing	Isabela Sur	Isabela	West	9.18	-1.02	-91.1	2	3	0.3
1899	Villamil	Nov	2003	22.2	Day	Landing	Isabela Sur	Isabela	West	9.18	-1.02	-91.1	1	3	4.3
1900	Villamil	Nov	2003	22.2	Day	Landing	Isabela Sur	Isabela	West	9.18	-1.02	-91.1	1	4	0.55
1901	Villamil	Nov	2003	22.2	Day	Landing	Isabela Sur	Isabela	West	9.18	-1.02	-91.1	1	4	0.55
1902	Villamil	Nov	2003	22.2	Day	Landing	Isabela Sur	Isabela	West	9.18	-1.02	-91.1	1	4	0.775
1903	Villamil	Nov	2003	22.2	Day	Landing	Isabela Sur	Isabela	West	9.18	-1.02	-91.1	1	3	1.866666667
1904	Villamil	Nov	2003	22.2	Day	Landing	Isabela Sur	Isabela	West	9.18	-1.02	-91.1	2	4	0.9875
1905	Villamil	Nov	2003	22.2	Day	Landing	Isabela Sur	Isabela	West	9.18	-1.02	-91.1	1	4	0.05
1906	Villamil	Nov	2003	22.2	Day	Landing	Isabela Sur	Isabela	West	9.18	-1.02	-91.1	1	4	1.125
1907	Villamil	Nov	2003	22.2	Day	Landing	Isabela Sur	Isabela	West	9.18	-1.02	-91.1	1	5	0.3
1908	Villamil	Nov	2003	22.2	Day	Landing	Isabela Sur	Isabela	West	9.18	-1.02	-91.1	2	5	1.09
1909	Villamil	Nov	2003	22.2	Day	Landing	Isabela Sur	Isabela	West	9.18	-1.02	-91.1	1	4	0.125
1910	Villamil	Nov	2003	22.2	Day	Landing	Isabela Sur	Isabela	West	9.18	-1.02	-91.1	1	9	0.766666667
1911	Villamil	Nov	2003	22.2	Day	Landing	Isabela Sur	Isabela	West	9.18	-1.02	-91.1	1	4	0.1
1912	Villamil	Nov	2003	22.2	Day	Landing	Isabela Sur	Isabela	West	9.18	-1.02	-91.1	1	4	1.025
1913	Villamil	Nov	2003	22.2	Day	Landing	Isabela Sur	Isabela	West	9.18	-1.02	-91.1	1	4	0.175
1914	Villamil	Nov	2003	22.2	Day	Landing	Isabela Sur	Isabela	West	9.18	-1.02	-91.1	1	4	0.4
1915	Villamil	Nov	2003	22.2	Day	Landing	Isabela Sur	Isabela	West	9.18	-1.02	-91.1	1	4	0.8
1916	Villamil	Nov	2003	22.2	Day	Landing	Isabela Sur	Isabela	West	9.18	-1.02	-91.1	1	4	0.675
1917	Villamil	Nov	2003	22.2	Day	Landing	Isabela Sur	Isabela	West	9.18	-1.02	-91.1	1	3	0.233333333
1918	Villamil	Nov	2003	22.2	Day	Landing	Isabela Sur	Isabela	West	9.18	-1.02	-91.1	1	4	0.45
1919	Villamil	Nov	2003	22.2	Day	Landing	Isabela Sur	Isabela	West	9.18	-1.02	-91.1	2	4	0.025
1920	Villamil	Nov	2003	22.2	Day	Landing	Isabela Sur	Isabela	West	9.18	-1.02	-91.1	1	4	0.05
1921	Villamil	Nov	2003	22.2	Day	Landing	Isabela Sur	Isabela	West	9.18	-1.02	-91.1	2	4	0.1125
1922	Villamil	Nov	2003	22.2	Day	Landing	Isabela Sur	Isabela	West	9.18	-1.02	-91.1	1	4	1.025
1923	Villamil	Nov	2003	22.2	Day	Landing	Isabela Sur	Isabela	West	1.21	-0.978203	-90.95763	1	4	0.55
1924	Villamil	Nov	2003	22.2	Day	Landing	Isabela Sur	Isabela	West	1.21	-0.978203	-90.95763	1	4	0.45
1925	Villamil	Nov	2003	22.2	Day	Landing	Isabela Sur	Isabela	West	1.21	-0.978203	-90.95763	1	3	0.5
1926	Villamil	Nov	2003	22.2	Day	Landing	Isabela Sur	Isabela	West	14.9	-1.04912	-91.18457	1	4	1.075
1927	Villamil	Nov	2003	22.2	Day	Landing	Isabela Sur	Isabela	West	14.9	-1.04912	-91.18457	1	8	0.45
1928	Villamil	Nov	2003	22.2	Day	Landing	Isabela Sur	Isabela	West	14.9	-1.04912	-91.18457	2	8	2.43125
1929	Villamil	Nov	2003	22.2	Day	Landing	Isabela Sur	Isabela	West	14.9	-1.04912	-91.18457	2	20	0.1475
1930	Villamil	Nov	2003	22.2	Day	Landing	Isabela Sur	Isabela	West	6.56	-1.01864	-91.05577	1	3	0.066666667
1931	Villamil	Nov	2003	22.2	Day	Landing	Isabela Sur	Isabela	West	6.56	-1.01864	-91.05577	1	4	0.1
1932	Villamil	Nov	2003	22.2	Day	Observer	Isabela Sur	Isabela	West	6.56	-1.04529	-91.05668	1	5	0.26
1933	Villamil	Nov	2003	22.2	Day	Landing	Isabela Sur	Isabela	West	9.22	-1.03944	-91.0943	1	4	1.2
1934	Villamil	Nov	2003	22.2	Day	Landing	Isabela Sur	Isabela	West	18	-1.0358	-91.2282	1	8	0.65
1935	Villamil	Nov	2003	22.2	Day	Landing	Isabela Sur	Isabela	West	18	-1.0358	-91.2282	1	25	0.288
1936	Villamil	Nov	2003	22.2	Day	Landing	Isabela Sur	Isabela	West	18	-1.0358	-91.2282	1	20	0.215
1937	Villamil	Nov	2003	22.2	Day	Landing	Isabela Sur	Isabela	West	18	-1.0358	-91.2282	1	4	0.85
1938	Villamil	Nov	2003	22.2	Day	Landing	Isabela Sur	Isabela	West	18	-1.0358	-91.2282	2	15	0.286666667
1939	Baquerizo	Nov	2003	22.2	Night	Landing	Isabela Sur	Isabela	West	137	-0.93874	-91.49262	10	40	0.36
1940	Ayora	Nov	2003	24.8	Night	Landing	Marchena	Marchena	North	104	0.640889	-90.76494	2	7	1.039285714
1941	Baquerizo	Dec	2003	23.7	Night	Landing	Espa�ola	Espa�ola	Centre- South	33	1.3434	-89.6983	2	6	0.908333333
1942	Baquerizo	Dec	2003	23.7	Night	Landing	Espa�ola	Espa�ola	Centre- South	36.6	-1.3477	-89.6749	2	4	0.175
1943	Baquerizo	Dec	2003	23.7	Night	Landing	Espa�ola	Espa�ola	Centre- South	36.6	-1.3477	-89.6749	2	5	0.772
1944	Baquerizo	Dec	2003	23.3	Night	Landing	Floreana	Floreana	Centre- South	69.4	-1.29001	-90.4992	15	20	0.895333333
1945	Ayora	Dec	2003	24.6	Day	Landing	Isabela Norte y Este	Isabela	West	42.2	-0.58936	-90.94234	1	10	0.091
1946	Ayora	Dec	2003	24.6	Day	Landing	Isabela Norte y Este	Isabela	West	50.3	-0.375	-90.9555	4	24	1.609375
1947	Villamil	Dec	2003	23.9	Day	Landing	Isabela Sur	Isabela	West	3.7	-0.99697	-91.01602	1	4	0.05
1948	Villamil	Dec	2003	23.9	Day	Landing	Isabela Sur	Isabela	West	17	-0.79173	-90.81927	1	4	0.05
1949	Villamil	Dec	2003	23.9	Day	Landing	Isabela Sur	Isabela	West	17	-0.79173	-90.81927	1	4	0.275
1950	Villamil	Dec	2003	23.9	Day	Landing	Isabela Sur	Isabela	West	17	-0.79173	-90.81927	1	4	0.85
1951	Villamil	Dec	2003	23.9	Day	Landing	Isabela Sur	Isabela	West	17	-0.79173	-90.81927	2	4	1.25
1952	Villamil	Dec	2003	23.9	Day	Landing	Isabela Sur	Isabela	West	4.83	-1.0041	-91.039	1	4	0.975
1953	Villamil	Dec	2003	23.9	Day	Landing	Isabela Sur	Isabela	West	4.83	-1.0041	-91.039	1	4	0.225
1954	Villamil	Dec	2003	23.9	Day	Landing	Isabela Sur	Isabela	West	4.83	-1.0041	-91.039	1	4	0.125
1955	Villamil	Dec	2003	23.9	Day	Landing	Isabela Sur	Isabela	West	4.83	-1.0041	-91.039	1	4	0.175
1956	Villamil	Dec	2003	23.9	Day	Landing	Isabela Sur	Isabela	West	4.83	-1.0041	-91.039	1	4	0.05
1957	Villamil	Dec	2003	23.9	Day	Landing	Isabela Sur	Isabela	West	4.83	-1.0041	-91.039	1	4	0.05
1958	Villamil	Dec	2003	23.9	Day	Landing	Isabela Sur	Isabela	West	4.83	-1.0041	-91.039	1	3	0.3
1959	Villamil	Dec	2003	23.9	Day	Landing	Isabela Sur	Isabela	West	4.83	-1.0041	-91.039	1	4	0.175
1960	Villamil	Dec	2003	23.9	Day	Landing	Isabela Sur	Isabela	West	4.83	-1.0041	-91.039	1	4	0.05
1961	Villamil	Dec	2003	23.9	Day	Landing	Isabela Sur	Isabela	West	4.83	-1.0041	-91.039	1	3	1.433333333
1962	Villamil	Dec	2003	23.9	Day	Landing	Isabela Sur	Isabela	West	0.52	-0.96708	-90.9665	1	4	0.625
1963	Villamil	Dec	2003	23.9	Day	Landing	Isabela Sur	Isabela	West	0.52	-0.96708	-90.9665	1	4	0.175
1964	Villamil	Dec	2003	23.9	Day	Landing	Isabela Sur	Isabela	West	0.52	-0.96708	-90.9665	1	4	0.05
1965	Villamil	Dec	2003	23.9	Day	Landing	Isabela Sur	Isabela	West	1.93	-0.97723	-90.98803	1	4	0.175
1966	Villamil	Dec	2003	23.9	Day	Landing	Isabela Sur	Isabela	West	1.93	-0.97723	-90.98803	1	4	0.05
1967	Villamil	Dec	2003	23.9	Day	Landing	Isabela Sur	Isabela	West	12.2	-1.0394	-91.1467	1	8	0.3125
1968	Villamil	Dec	2003	23.9	Day	Landing	Isabela Sur	Isabela	West	12.2	-1.0394	-91.1467	1	10	0.07
1969	Villamil	Dec	2003	23.9	Day	Observer	Isabela Sur	Isabela	West	12.2	-1.04532	-91.17563	1	4	1.925
1970	Villamil	Dec	2003	23.9	Day	Observer	Isabela Sur	Isabela	West	12.2	-1.03939	-91.14666	1	8	0.7375
1971	Villamil	Dec	2003	23.9	Day	Observer	Isabela Sur	Isabela	West	12.2	-1.03891	-91.18784	1	7	0.9
1972	Villamil	Dec	2003	23.9	Day	Observer	Isabela Sur	Isabela	West	12.2	-1.04848	-91.24032	1	8	0.675
1973	Villamil	Dec	2003	23.9	Day	Observer	Isabela Sur	Isabela	West	12.2	-1.04951	-91.19331	1	7	0.028571429
1974	Villamil	Dec	2003	23.9	Day	Observer	Isabela Sur	Isabela	West	12.2	-1.03481	-91.18431	1	10	0.22
1975	Villamil	Dec	2003	23.9	Day	Observer	Isabela Sur	Isabela	West	12.2	-1.04398	-91.18345	1	12	0.108333333
1976	Villamil	Dec	2003	23.9	Day	Landing	Isabela Sur	Isabela	West	12.2	-1.0394	-91.1467	1	13	0.176923077
1977	Villamil	Dec	2003	23.9	Day	Landing	Isabela Sur	Isabela	West	12.2	-1.0394	-91.1467	1	15	0.013333333
1978	Villamil	Dec	2003	23.9	Day	Landing	Isabela Sur	Isabela	West	12.2	-1.0394	-91.1467	1	4	0.225
1979	Villamil	Dec	2003	23.9	Day	Landing	Isabela Sur	Isabela	West	12.2	-1.0394	-91.1467	2	6	0.508333333
1980	Villamil	Dec	2003	23.9	Day	Observer	Isabela Sur	Isabela	West	12.2	-1.0394	-91.1467	1	9	0.5
1981	Villamil	Dec	2003	23.9	Day	Observer	Isabela Sur	Isabela	West	12.2	-1.0394	-91.1467	1	8	0.5625
1982	Villamil	Dec	2003	23.9	Night	Observer	Isabela Sur	Isabela	West	12.2	-1.0394	-91.1467	1	5	0.54
1983	Villamil	Dec	2003	23.9	Day	Landing	Isabela Sur	Isabela	West	22.7	-0.72072	-90.80723	1	3.5	0.4
1984	Villamil	Dec	2003	23.9	Day	Landing	Isabela Sur	Isabela	West	22.7	-0.72072	-90.80723	1	4	0.125
1985	Villamil	Dec	2003	23.9	Day	Landing	Isabela Sur	Isabela	West	22.7	-0.72072	-90.80723	1	4	0.175
1986	Villamil	Dec	2003	23.9	Day	Landing	Isabela Sur	Isabela	West	22.7	-0.72072	-90.80723	2	5	0.16
1987	Villamil	Dec	2003	23.9	Day	Landing	Isabela Sur	Isabela	West	22.7	-0.72072	-90.80723	1	3.5	0.142857143
1988	Villamil	Dec	2003	23.9	Day	Landing	Isabela Sur	Isabela	West	22.7	-0.72072	-90.80723	2	4	0.45
1989	Villamil	Dec	2003	23.9	Day	Landing	Isabela Sur	Isabela	West	22.7	-0.72072	-90.80723	1	3	0.466666667
1990	Villamil	Dec	2003	23.9	Day	Landing	Isabela Sur	Isabela	West	34.2	-0.95519	-91.461	1	5	1.82
1991	Villamil	Dec	2003	23.9	Day	Landing	Isabela Sur	Isabela	West	34.2	-0.95519	-91.461	1	20	1.16
1992	Villamil	Dec	2003	23.9	Day	Landing	Isabela Sur	Isabela	West	7.27	-1.0306	-90.8846	2	4	1.075
1993	Villamil	Dec	2003	23.9	Day	Landing	Isabela Sur	Isabela	West	9.18	-1.02	-91.1	1	4	0.275
1994	Villamil	Dec	2003	23.9	Day	Landing	Isabela Sur	Isabela	West	9.18	-1.02	-91.1	2	4	0.0625
1995	Villamil	Dec	2003	23.9	Day	Landing	Isabela Sur	Isabela	West	9.18	-1.02	-91.1	2	4	0.5125
1996	Villamil	Dec	2003	23.9	Day	Landing	Isabela Sur	Isabela	West	9.18	-1.02	-91.1	1	4	0.225
1997	Villamil	Dec	2003	23.9	Day	Landing	Isabela Sur	Isabela	West	9.18	-1.02	-91.1	1	4	0.125
1998	Villamil	Dec	2003	23.9	Day	Landing	Isabela Sur	Isabela	West	9.18	-1.02	-91.1	1	4	0.575
1999	Villamil	Dec	2003	23.9	Night	Landing	Isabela Sur	Isabela	West	9.18	-1.02	-91.1	1	3	1.5
[truncated: 3,087 more rows]
